# Supplementary material for: Co-expression and co-localization of hub proteins and their partners are encoded in protein sequence
Source: Royal Society of Chemistry journal article supplement (doi:10.1039/c3mb70411d), 2014-01-02
Supplement: c3mb70411d.xlsx [file c3mb70411d.xlsx]

## Sheet: Supp.Table S1
				0	1	2	3	4	5	6	7	8	9	10	11	12	13	14	15	16	17	18	19	20	21	22	23	24	25	26	27	28	29	30	31	32	33
Name	party/date	Han et al.	Bertin et al.	ISIS_HS	ISIS_Streches	V	L	I	M	F	W	Y	G	A	P	S	T	C	H	R	K	Q	E	N	D	MD_HS	MD_Streches	Is_NORS	Cytoplasmic	DNA-binding	Not DNA-binding	Extra-cellular	Mitochondria	Organellar	Membrane	LOC_Score	Length
AKR1_YEAST	party	1	0	14	8	53	87	49	14	49	15	22	51	44	31	50	49	12	21	24	40	21	40	46	46	26	5	0	100	0	0	0	0	0	100	2	764
APC1_YEAST	party	1	1	19	9	90	206	132	36	78	19	60	95	85	72	189	95	20	32	72	108	59	99	90	111	194	17	100	100	0	0	0	0	0	100	2	1748
APC2_YEAST	party	1	1	11	6	38	113	63	18	47	13	34	22	27	31	56	50	12	20	35	67	28	54	69	56	45	7	0	0	0	100	0	0	0	0	2	853
APC4_YEAST	party	1	1	12	9	37	72	60	6	36	6	32	27	27	22	51	27	8	12	30	48	19	39	41	52	30	7	100	0	0	100	0	0	0	0	5	652
APC5_YEAST	party	1	1	9	6	36	86	59	18	35	7	27	18	24	17	63	34	12	10	25	46	25	52	50	41	25	4	0	0	0	100	0	0	0	0	6	685
APC9_YEAST	party	1	1	15	7	11	27	12	6	10	2	9	11	8	12	21	10	6	10	19	16	5	25	23	22	152	10	100	0	0	100	0	0	0	0	7	265
ARP2_YEAST	party	1	1	9	2	33	39	20	13	16	5	14	28	22	23	28	17	3	7	25	21	13	28	10	26	6	2	0	100	0	0	0	0	0	0	9	391
ATPA_YEAST	party	1	1	16	13	44	65	30	3	15	2	14	47	61	21	43	27	1	6	35	29	26	37	18	21	16	4	0	0	0	0	0	100	0	0	7	545
ATPB_YEAST	party	1	1	10	6	45	48	34	8	18	1	11	46	54	25	28	37	1	7	25	29	20	38	11	25	12	2	0	0	0	0	0	100	0	0	6	511
ATPD_YEAST	party	1	0	18	6	15	17	7	2	7	0	2	9	20	6	20	5	1	2	5	10	8	14	8	2	69	3	0	100	0	0	0	0	0	0	3	160
ATPG_YEAST	party	1	0	21	11	15	24	28	11	8	0	9	13	32	11	25	22	2	4	14	28	11	18	21	15	42	6	0	0	0	0	0	100	0	0	6	311
ATPO_YEAST	party	1	0	12	4	18	28	10	1	8	0	3	13	21	8	20	9	1	3	7	23	5	11	13	10	66	6	0	0	0	0	0	100	0	0	6	212
CDC10_YEAST	party	1	1	14	8	18	30	30	4	16	2	10	14	16	9	24	24	1	8	22	16	13	29	18	18	26	2	0	100	0	0	0	0	0	0	3	322
CDC11_YEAST	party	1	1	4	2	18	45	37	7	12	2	12	23	11	13	34	27	3	8	31	20	15	45	24	28	122	5	0	100	0	0	0	0	0	0	4	415
CDC12_YEAST	party	1	1	5	5	24	36	25	6	16	3	10	21	28	20	16	26	2	11	29	30	26	36	20	22	116	8	0	0	0	100	0	0	0	0	5	407
CDC16_YEAST	party	1	1	7	5	36	93	36	22	34	6	36	27	63	27	77	50	16	17	31	62	30	44	78	55	185	12	0	0	100	0	0	0	0	0	3	840
CDC23_YEAST	party	1	1	10	6	23	71	35	17	34	10	36	24	42	9	46	26	14	9	28	47	31	50	33	41	35	6	0	0	0	0	100	0	0	0	3	626
CDC26_YEAST	party	1	1	6	5	3	10	6	2	3	0	3	3	6	2	12	10	0	6	4	6	7	7	17	17	124	1	100	0	0	100	0	0	0	0	8	124
CDC27_YEAST	party	1	1	3	2	24	86	45	16	27	5	36	23	51	31	84	42	16	20	22	50	38	30	84	28	103	12	0	0	100	0	0	0	0	0	3	758
CDC53_YEAST	party	1	1	14	9	35	84	63	22	38	8	34	30	52	30	54	46	6	20	33	77	31	59	48	45	80	13	0	0	0	0	100	0	0	0	1	815
COPB2_YEAST	party	1	1	21	14	68	78	41	8	43	20	33	63	63	32	66	55	6	14	30	51	28	77	52	61	80	5	100	100	0	0	0	0	0	0	3	889
COPD_YEAST	party	1	0	14	8	31	41	39	12	23	2	16	24	45	24	64	29	1	14	25	28	25	42	26	35	135	8	100	100	0	0	0	0	0	0	2	546
EIF3B_YEAST	party	1	1	20	10	61	52	40	18	47	17	23	29	41	38	56	45	6	15	38	59	22	62	45	49	32	5	0	100	0	0	0	0	0	0	3	763
EMP24_YEAST	party	1	0	11	7	16	17	12	1	17	2	8	10	10	5	18	15	3	6	13	9	7	12	10	12	27	9	0	0	0	0	100	0	0	100	5	203
GIN4_YEAST	party	1	1	9	6	54	108	74	15	35	6	24	54	49	50	119	61	4	19	75	118	42	112	66	57	756	9	100	0	0	100	0	0	0	0	8	1142
IF4F1_YEAST	party	1	1	4	4	38	55	36	17	25	7	23	54	59	56	85	74	4	14	57	88	42	109	59	50	781	9	100	0	100	0	0	0	0	0	6	952
IMB1_YEAST	party	1	1	0	0	54	90	59	25	33	9	24	33	102	34	66	44	11	6	27	35	55	57	47	50	14	2	0	100	0	0	0	0	0	0	4	861
NAM7_YEAST	party	1	1	4	3	65	99	54	14	39	13	28	53	59	44	80	45	19	22	49	60	50	66	57	55	146	8	100	100	0	0	0	0	0	0	3	971
NDC80_YEAST	party	1	1	0	0	18	77	62	13	20	5	17	24	15	13	63	40	2	16	33	73	43	67	57	33	428	21	100	100	0	0	0	0	0	0	2	691
ORC1_YEAST	party	1	1	4	3	53	78	61	21	31	8	31	40	61	27	57	57	6	11	49	86	29	83	56	69	288	8	100	0	100	0	0	0	0	0	4	914
PRS10_YEAST	party	1	1	17	8	21	38	34	11	16	0	9	32	28	22	17	25	2	9	31	32	21	45	15	29	86	7	0	0	0	100	0	0	0	0	7	437
PRS4_YEAST	party	1	0	17	8	24	47	31	14	10	0	10	32	20	23	28	23	4	6	20	44	17	42	14	28	77	4	0	0	0	100	0	0	0	0	8	437
PRS6A_YEAST	party	1	1	12	5	32	48	21	13	13	1	6	23	36	16	26	24	1	3	24	33	20	36	21	37	59	6	0	100	0	0	0	0	0	0	5	434
PRS6B_YEAST	party	1	1	13	9	35	46	29	11	12	0	12	22	32	19	30	21	0	4	30	26	18	33	17	31	43	5	0	0	0	100	0	0	0	0	6	428
PRS7_YEAST	party	1	1	13	7	30	35	29	12	14	3	11	36	32	26	26	26	6	3	33	36	12	38	19	40	95	7	0	100	0	0	0	0	0	0	6	467
PRS8_YEAST	party	1	1	18	12	37	37	31	14	10	0	8	27	26	16	24	18	4	8	27	36	13	35	14	20	21	7	0	0	0	100	0	0	0	0	3	405
PSA2_YEAST	party	1	0	20	12	16	26	15	4	9	2	10	23	18	12	23	19	0	3	9	18	6	17	6	14	2	1	0	100	0	0	0	0	0	0	2	250
PSA6_YEAST	party	1	0	22	11	18	15	18	6	10	1	13	14	28	10	14	18	3	4	11	18	8	18	11	14	14	2	0	100	0	0	0	0	0	0	4	252
PSB2_YEAST	party	1	1	22	9	15	19	14	5	7	0	11	13	10	7	15	8	1	4	11	14	13	11	3	17	20	3	0	100	0	0	0	0	0	0	5	198
RPA12_YEAST	party	1	0	34	12	9	11	3	2	5	0	4	7	8	4	12	10	8	1	3	12	4	7	9	6	118	3	0	0	0	100	0	0	0	0	5	125
RPA1_YEAST	party	1	1	50	29	115	143	92	43	61	8	54	96	103	64	132	104	24	37	79	130	65	111	98	105	125	13	100	100	0	0	0	0	0	0	2	1664
RPA2_YEAST	party	1	1	28	17	80	103	78	34	52	10	49	100	50	61	86	58	18	30	72	67	59	67	58	71	21	5	0	0	0	100	0	0	0	0	5	1203
RPAB1_YEAST	party	1	1	17	9	15	15	15	9	10	2	7	8	10	12	15	11	3	4	17	17	9	20	8	8	51	9	0	0	100	0	0	0	0	0	5	215
RPAB2_YEAST	party	1	1	21	7	7	10	9	4	8	1	5	9	9	8	5	11	0	2	9	11	6	21	6	14	131	6	100	0	0	100	0	0	0	0	7	155
RPAB3_YEAST	party	1	0	30	11	9	16	6	3	5	1	9	6	12	5	12	9	2	0	9	5	6	8	10	13	59	7	0	100	0	0	0	0	0	0	7	146
RPAB5_YEAST	party	1	1	15	6	5	11	3	2	2	1	3	4	1	2	3	2	4	1	7	5	1	6	2	5	38	5	0	0	0	100	0	0	0	0	7	70
RPAC1_YEAST	party	1	1	10	5	26	23	24	4	19	2	9	15	24	20	22	17	5	5	18	23	8	24	22	25	11	5	0	100	0	0	0	0	0	0	2	335
RPAC2_YEAST	party	1	0	10	6	8	10	9	5	3	0	3	6	6	6	7	13	2	3	3	11	9	22	4	12	99	8	0	0	0	100	0	0	0	0	3	142
RPB9_YEAST	party	1	1	33	14	7	8	4	3	9	0	3	4	2	5	11	9	8	3	12	5	6	9	7	7	103	3	0	0	0	100	0	0	0	0	5	122
RPC1_YEAST	party	1	0	38	21	107	141	95	37	50	10	40	105	98	67	100	67	24	30	84	103	47	87	79	89	30	6	0	0	0	100	0	0	0	0	4	1460
RPC2_YEAST	party	1	0	35	18	71	111	93	42	34	4	48	78	65	44	73	60	19	28	60	85	48	63	49	74	39	7	0	0	0	100	0	0	0	0	4	1149
RPC6_YEAST	party	1	0	8	6	21	31	20	10	16	4	11	17	15	9	25	18	3	5	7	27	17	30	18	13	51	6	0	100	0	0	0	0	0	0	4	317
RPC8_YEAST	party	1	0	12	6	13	17	20	4	12	5	6	13	9	13	10	11	4	2	8	14	7	23	10	11	43	3	0	100	0	0	0	0	0	0	3	212
RPN10_YEAST	party	1	1	13	5	14	24	17	7	12	0	2	18	20	12	19	14	1	6	14	9	24	25	15	15	62	4	0	0	100	0	0	0	0	0	3	268
RPN11_YEAST	party	1	1	4	3	30	27	13	16	6	3	10	19	19	6	21	19	1	8	12	24	14	24	16	18	64	8	0	0	0	100	0	0	0	0	5	306
RPN12_YEAST	party	1	1	7	5	4	37	24	6	14	3	13	4	14	8	26	9	1	4	4	25	10	24	25	19	34	5	0	100	0	0	0	0	0	0	2	274
RPN3_YEAST	party	1	1	8	3	24	71	36	13	21	3	23	12	22	11	51	27	7	13	19	40	20	36	35	39	90	6	0	0	0	100	0	0	0	0	2	523
RPN5_YEAST	party	1	1	4	3	27	61	35	8	8	5	18	10	20	9	33	19	2	11	15	46	24	45	24	25	44	8	0	0	0	0	100	0	0	0	1	445
RPN6_YEAST	party	1	1	1	1	24	57	21	10	16	1	23	13	30	7	36	21	6	10	13	43	21	35	19	28	42	3	0	0	0	0	0	100	0	0	3	434
RPN7_YEAST	party	1	0	0	0	28	50	22	6	14	3	26	18	32	8	33	21	5	4	16	38	16	42	23	24	56	7	0	0	0	0	100	0	0	0	5	429
RPN8_YEAST	party	1	1	8	4	23	39	26	4	7	2	7	14	16	10	20	17	3	8	11	34	16	28	26	27	71	4	0	0	0	100	0	0	0	0	7	338
RPN9_YEAST	party	1	1	6	3	17	57	28	8	23	5	14	11	14	9	35	19	1	8	14	35	18	23	19	35	31	4	0	100	0	0	0	0	0	0	4	393
RRP41_YEAST	party	1	1	25	7	16	29	20	9	5	1	5	16	12	7	24	12	0	6	18	15	5	19	14	13	41	4	0	0	0	100	0	0	0	0	7	246
RRP42_YEAST	party	1	1	19	8	26	32	20	4	10	1	7	10	15	14	36	8	1	7	7	16	5	13	14	19	3	2	0	100	0	0	0	0	0	0	2	265
RRP43_YEAST	party	1	1	23	10	24	40	36	8	9	2	11	18	27	14	32	29	5	5	23	22	7	37	19	26	34	7	0	0	0	0	0	100	0	0	3	394
RRP44_YEAST	party	1	1	37	20	84	94	59	22	37	7	33	35	65	53	74	48	15	21	68	62	32	59	53	80	78	10	0	100	0	0	0	0	0	0	4	1001
RRP45_YEAST	party	1	1	15	8	22	23	29	8	14	1	4	20	19	10	21	14	10	7	15	18	10	29	12	19	31	3	0	0	0	100	0	0	0	0	3	305
RRP46_YEAST	party	1	1	17	7	19	28	22	2	6	0	1	10	16	9	16	12	8	3	10	10	12	18	8	13	28	4	0	100	0	0	0	0	0	0	2	223
RRP4_YEAST	party	1	1	5	4	26	28	26	11	6	4	11	29	19	11	42	19	3	7	20	16	12	22	28	19	57	6	0	0	100	0	0	0	0	0	6	359
SEC13_YEAST	party	1	1	39	16	27	24	16	1	5	15	7	22	23	10	26	18	3	12	8	20	7	23	13	17	4	2	0	100	0	0	0	0	0	0	6	297
SEC17_YEAST	party	1	1	6	4	9	30	14	4	15	3	11	17	30	3	25	6	7	3	10	27	15	24	15	24	37	4	0	100	0	0	0	0	0	0	5	292
SEC23_YEAST	party	1	1	19	13	40	79	44	16	39	6	28	38	62	48	62	52	11	18	30	31	37	35	46	46	14	4	0	0	0	100	0	0	0	0	2	768
SMC1_YEAST	party	1	0	2	2	51	131	94	17	39	3	40	49	61	22	94	53	6	18	60	134	62	135	86	70	380	48	0	100	0	0	0	0	0	0	3	1225
SMD1_YEAST	party	1	0	42	7	6	21	10	3	2	1	2	9	8	8	11	9	0	0	12	10	11	2	14	7	94	3	0	100	0	0	0	0	0	0	6	146
STE5_YEAST	party	1	1	20	15	43	93	68	10	41	6	20	33	36	51	112	58	16	20	41	50	28	56	72	63	376	12	100	0	0	100	0	0	0	0	6	917
SXM1_YEAST	party	1	1	5	4	54	119	87	23	59	9	30	25	52	38	71	39	11	14	27	52	42	82	54	56	38	7	0	100	0	0	0	0	0	0	3	944
TBG_YEAST	party	1	1	17	10	32	39	27	15	24	4	15	27	26	20	53	26	3	10	19	15	18	25	36	39	34	2	0	0	0	100	0	0	0	0	8	473
TLG2_YEAST	party	1	1	1	1	20	45	23	9	14	0	13	15	19	9	25	20	3	10	24	29	19	34	29	37	219	8	0	0	0	0	0	0	100	0	1	397
TOM40_YEAST	party	1	1	10	8	23	42	16	6	21	3	11	30	30	20	37	26	4	4	10	19	28	16	22	19	36	3	0	0	0	0	0	100	0	0	1	387
VA0D_YEAST	party	1	1	3	3	14	38	24	8	17	4	21	16	20	9	24	22	6	5	15	12	16	28	22	24	2	2	0	100	0	0	0	0	0	0	2	345
VATA_YEAST	party	1	1	24	16	80	87	63	23	41	10	43	83	80	45	87	64	12	20	55	71	27	81	38	61	18	5	0	0	0	0	0	100	0	0	7	1071
VATB_YEAST	party	1	1	19	12	31	42	42	12	20	1	19	37	36	27	33	31	1	7	33	26	16	44	23	36	30	2	0	0	0	0	0	100	0	0	6	517
VATD_YEAST	party	1	1	9	6	19	20	15	6	9	0	8	13	22	4	14	16	0	1	21	19	17	27	10	15	60	2	0	0	0	0	0	100	0	0	4	256
VATE_YEAST	party	1	1	2	1	11	27	20	6	5	0	5	7	18	6	16	9	0	0	11	26	9	28	16	13	156	5	0	100	0	0	0	0	0	0	6	233
VATF_YEAST	party	1	1	16	5	5	9	12	1	7	0	2	5	9	5	3	11	0	3	6	9	4	13	5	9	67	6	0	0	0	0	0	0	100	0	7	118
VATL1_YEAST	party	1	0	15	6	17	22	16	3	8	0	6	22	19	5	10	6	6	0	4	3	6	2	2	3	11	3	0	0	0	100	0	0	0	100	4	160
VATL2_YEAST	party	1	0	16	5	14	21	16	8	9	0	7	22	17	6	12	6	5	2	3	4	2	4	4	2	14	2	0	0	0	100	0	0	0	100	8	164
VATO_YEAST	party	1	0	17	8	17	25	25	6	13	3	9	24	21	2	20	11	3	2	3	10	1	5	7	6	10	2	0	0	0	100	0	0	0	100	7	213
VPH1_YEAST	party	1	1	7	5	49	87	61	32	53	15	35	50	62	23	61	45	7	21	31	45	28	53	32	50	58	7	0	0	0	0	0	100	0	100	3	840
YSH1_YEAST	party	1	1	7	5	59	76	55	21	39	5	15	44	40	26	58	41	10	23	33	45	27	62	47	53	63	6	0	100	0	0	0	0	0	0	4	779
APP1_YEAST	party	0	1	18	12	29	42	37	17	24	4	22	27	24	45	59	49	5	9	33	31	23	28	36	43	173	10	100	0	0	0	0	100	0	0	3	587
ARB1_YEAST	party	0	1	22	15	42	75	28	13	21	4	18	38	44	23	42	30	3	13	31	49	28	45	21	42	77	5	0	0	0	0	0	100	0	0	3	610
ARF1_YEAST	party	0	1	14	7	12	19	11	6	8	5	5	15	11	3	12	12	1	2	12	9	5	14	12	7	12	3	0	0	0	100	0	0	0	0	5	181
ARP3_YEAST	party	0	1	11	5	33	33	26	5	27	5	15	34	33	22	40	28	5	6	21	23	14	29	28	22	1	1	0	100	0	0	0	0	0	0	4	449
ARP7_YEAST	party	0	1	13	10	26	45	30	16	18	7	19	26	31	21	36	30	4	4	15	34	28	32	30	25	21	7	100	100	0	0	0	0	0	100	6	477
ARPC1_YEAST	party	0	1	20	10	33	26	24	3	14	10	15	26	27	14	42	20	10	11	13	25	10	19	21	21	3	1	0	0	0	100	0	0	0	0	2	384
ARPC4_YEAST	party	0	1	20	10	14	18	12	6	10	0	6	2	11	7	15	7	0	4	12	7	7	20	8	5	52	7	0	0	0	0	0	100	0	0	4	171
ARX1_YEAST	party	0	1	25	11	40	68	38	9	12	6	15	38	35	27	51	52	9	15	23	40	27	34	23	31	34	6	0	100	0	0	0	0	0	0	2	593
ASF1_YEAST	party	0	1	6	3	22	18	12	1	7	2	7	16	11	14	18	10	2	3	10	13	4	58	16	35	132	3	0	0	0	0	100	0	0	0	1	279
ATPF_YEAST	party	0	1	5	3	23	27	13	6	7	1	6	10	23	6	26	11	1	2	11	21	13	18	10	9	32	6	0	0	0	0	0	100	0	100	9	244
BMH2_YEAST	party	0	1	16	7	11	24	14	5	5	2	12	8	23	7	31	16	1	5	12	17	28	31	7	14	59	4	0	100	0	0	0	0	0	0	8	273
BRR2_YEAST	party	0	1	46	30	136	232	155	41	93	26	73	92	116	85	177	109	24	44	85	157	79	176	135	128	262	10	100	0	0	100	0	0	0	0	3	2163
BSP1_YEAST	party	0	1	1	1	19	53	29	9	9	0	13	13	28	61	67	41	1	6	38	66	12	45	42	24	576	1	100	100	0	0	0	0	0	0	3	576
BZZ1_YEAST	party	0	1	1	1	31	49	35	10	17	8	21	31	35	24	55	49	4	10	21	64	19	43	55	52	255	20	100	100	0	0	0	0	0	0	6	633
CBF3A_YEAST	party	0	1	7	5	28	97	59	16	57	10	38	29	30	46	79	55	11	25	40	84	48	77	61	66	290	17	100	0	0	0	0	0	100	0	5	956
CDC45_YEAST	party	0	1	27	15	28	86	45	7	21	8	29	35	29	16	54	33	7	9	34	33	28	48	41	59	120	6	0	100	0	0	0	0	0	0	2	650
CDC4_YEAST	party	0	1	9	6	51	73	54	11	26	11	26	47	47	28	86	55	8	24	31	46	15	33	59	48	197	5	100	0	0	100	0	0	0	0	3	779
CIC1_YEAST	party	0	1	2	2	25	37	26	5	13	2	8	12	18	13	36	21	1	5	9	53	10	35	25	22	164	6	0	0	0	100	0	0	0	0	3	376
CLH_YEAST	party	0	1	39	23	103	205	128	21	67	14	70	67	127	58	101	76	14	30	52	118	74	127	101	100	39	4	0	100	0	0	0	0	0	0	3	1653
COG1_YEAST	party	0	1	4	4	21	63	27	2	20	3	11	2	8	16	34	36	5	10	12	28	28	20	36	35	37	7	0	0	0	0	0	0	100	0	5	417
COG3_YEAST	party	0	1	7	6	49	91	59	9	37	2	38	16	36	20	68	53	10	10	36	66	36	54	44	67	154	16	0	100	0	0	0	0	0	0	2	801
COG4_YEAST	party	0	1	2	2	51	107	66	15	43	9	21	19	45	19	84	45	4	18	32	63	48	56	62	54	113	17	0	100	0	0	0	0	0	0	3	861
COG6_YEAST	party	0	1	9	4	39	118	63	18	38	2	26	18	26	27	70	44	5	10	30	73	41	64	64	63	199	11	100	0	0	0	0	100	0	0	3	839
COG8_YEAST	party	0	1	0	0	35	63	42	10	16	1	15	12	24	13	49	43	6	6	28	55	15	80	43	51	345	11	0	0	0	100	0	0	0	0	5	607
COPG_YEAST	party	0	1	4	3	58	111	68	12	49	2	23	25	63	34	97	53	11	14	35	59	35	69	58	59	90	6	100	0	0	100	0	0	0	0	4	935
CSK21_YEAST	party	0	1	24	15	23	32	30	12	20	7	22	13	10	16	14	17	2	13	20	38	10	25	19	29	48	6	0	0	0	100	0	0	0	0	5	372
CSK2B_YEAST	party	0	1	43	12	15	21	8	7	18	4	12	16	12	13	22	10	9	8	13	15	11	36	6	22	89	5	0	100	0	0	0	0	0	0	5	278
CTF18_YEAST	party	0	1	9	5	36	74	59	14	28	11	17	34	36	33	58	35	9	13	35	66	32	43	56	52	216	13	100	0	0	100	0	0	0	0	2	741
DAD1_YEAST	party	0	1	13	2	3	11	8	3	2	1	2	4	3	2	13	7	0	0	2	5	5	10	7	6	90	3	0	100	0	0	0	0	0	0	6	94
DAM1_YEAST	party	0	1	12	7	13	31	19	8	9	1	6	18	16	13	44	19	1	6	24	26	13	25	32	19	277	4	100	0	0	100	0	0	0	0	7	343
DBF2_YEAST	party	0	1	25	14	26	56	24	18	34	5	24	30	26	24	47	35	6	11	40	42	23	33	27	41	205	9	100	0	0	100	0	0	0	0	4	572
DBF4_YEAST	party	0	1	6	6	33	61	31	10	23	7	20	19	46	27	52	62	6	19	38	77	28	50	53	42	516	11	100	0	0	100	0	0	0	0	7	704
DPOA_YEAST	party	0	1	19	8	91	145	87	35	46	7	49	68	66	68	112	78	29	22	86	111	60	95	94	119	408	9	100	0	100	0	0	0	0	0	5	1468
DPOE_YEAST	party	0	1	36	21	126	226	152	56	112	30	90	105	103	92	165	104	33	40	97	185	86	155	128	137	201	20	0	0	100	0	0	0	0	0	1	2222
DSL1_YEAST	party	0	1	1	1	34	94	52	18	33	14	27	20	32	15	57	38	7	14	26	60	28	74	58	53	142	5	100	0	0	0	0	0	100	0	5	754
DUO1_YEAST	party	0	1	27	7	12	19	17	5	4	2	4	12	13	13	28	16	1	6	15	21	10	10	27	12	174	7	100	0	0	100	0	0	0	0	7	247
EAF5_YEAST	party	0	1	10	6	14	35	22	9	6	1	4	18	9	6	15	20	0	7	14	24	14	21	24	16	72	11	0	0	0	100	0	0	0	0	4	279
EAF7_YEAST	party	0	1	1	1	17	22	17	8	6	4	8	18	13	17	34	26	1	9	24	55	14	72	31	29	386	3	100	0	0	100	0	0	0	0	6	425
ECO1_YEAST	party	0	1	22	11	20	17	24	6	2	6	12	19	12	11	29	16	3	8	20	25	8	15	19	9	38	4	0	0	0	0	0	0	100	0	1	281
EI2BG_YEAST	party	0	1	5	3	27	52	40	9	29	3	19	22	27	29	52	27	11	10	21	38	36	36	38	52	41	2	100	0	100	0	0	0	0	0	3	578
EIF3A_YEAST	party	0	1	8	5	56	88	54	19	27	6	31	26	92	36	64	51	1	18	59	96	42	113	30	55	511	17	0	100	0	0	0	0	0	0	3	964
EIF3C_YEAST	party	0	1	11	6	42	85	53	11	41	7	28	18	45	24	94	33	4	9	37	60	42	66	46	67	249	10	100	0	0	100	0	0	0	0	4	812
EIF3G_YEAST	party	0	1	23	8	20	19	12	6	6	3	6	20	22	13	23	11	4	3	20	23	8	33	11	11	132	5	100	100	0	0	0	0	0	0	3	274
EIF3I_YEAST	party	0	1	23	11	22	22	24	4	16	5	16	26	20	11	31	25	6	12	8	28	8	26	14	23	14	1	0	100	0	0	0	0	0	0	8	347
ELP2_YEAST	party	0	1	31	15	41	74	60	13	35	24	18	49	47	26	64	49	15	22	36	51	24	59	26	55	1	1	0	0	0	100	0	0	0	0	4	788
ELP5_YEAST	party	0	1	17	10	17	31	23	6	14	1	15	10	14	13	27	25	3	7	8	18	15	25	17	20	46	5	0	0	0	0	100	0	0	0	3	309
ENP1_YEAST	party	0	1	15	7	25	43	27	7	23	4	17	20	39	18	34	22	2	9	24	38	19	49	21	42	219	3	0	0	0	100	0	0	0	0	6	483
FBRL_YEAST	party	0	1	17	9	27	16	18	8	10	1	8	62	25	16	24	6	3	7	35	18	6	20	5	12	99	3	100	0	0	0	0	100	0	0	3	327
GGA2_YEAST	party	0	1	3	3	24	70	34	10	19	3	10	25	50	34	57	30	3	11	19	40	32	37	49	28	309	10	100	0	0	100	0	0	0	0	1	585
GPA1_YEAST	party	0	1	9	6	20	43	38	9	24	4	13	26	29	7	28	24	8	5	26	43	29	30	28	38	61	7	0	100	0	0	0	0	0	0	4	472
GYS2_YEAST	party	0	1	22	10	52	70	34	14	36	8	29	46	52	31	35	34	7	24	44	37	20	44	36	52	46	5	100	100	0	0	0	0	0	0	2	705
H2A1_YEAST	party	0	1	11	6	6	17	7	1	1	0	3	14	19	5	8	5	0	3	10	11	6	5	8	3	88	6	0	0	100	0	0	0	0	0	7	132
H2B1_YEAST	party	0	1	11	6	5	6	8	2	2	0	5	4	18	5	18	12	0	2	6	20	4	8	3	3	118	4	0	0	100	0	0	0	0	0	6	131
H3_YEAST	party	0	1	31	9	6	13	7	1	5	0	2	7	16	5	10	9	0	2	17	16	8	7	1	4	105	6	0	0	100	0	0	0	0	0	7	136
H4_YEAST	party	0	1	15	11	8	9	7	1	2	0	4	16	6	1	6	6	0	2	14	11	2	4	1	3	78	3	0	100	0	0	0	0	0	0	3	103
HSC82_YEAST	party	0	1	14	8	42	68	47	13	34	5	19	25	44	27	45	40	0	4	27	73	22	96	28	46	155	9	0	100	0	0	0	0	0	0	7	705
HSP72_YEAST	party	0	1	14	9	43	48	38	8	28	1	10	49	59	28	39	45	3	5	26	52	24	53	32	48	62	5	0	100	0	0	0	0	0	0	7	639
IF2A_YEAST	party	0	1	10	5	23	26	26	7	5	2	13	10	20	9	23	13	5	3	14	29	12	34	7	23	50	4	0	0	0	100	0	0	0	0	7	304
IF2B_YEAST	party	0	1	1	1	14	25	13	4	13	0	4	19	20	11	28	13	5	2	15	40	9	21	11	18	159	5	100	0	0	100	0	0	0	0	6	285
IF5_YEAST	party	0	1	3	2	24	33	29	6	14	3	9	23	30	19	27	15	7	8	16	37	11	39	20	35	144	5	0	0	0	100	0	0	0	0	4	405
IMB2_YEAST	party	0	1	2	1	51	111	76	28	47	12	21	35	56	37	68	46	16	19	23	44	37	64	57	70	31	2	0	100	0	0	0	0	0	0	7	918
KIN28_YEAST	party	0	1	27	14	19	30	22	13	14	5	13	13	19	20	16	16	4	7	16	20	9	19	12	19	18	2	0	0	0	100	0	0	0	0	7	306
KRR1_YEAST	party	0	1	7	4	20	25	19	10	13	4	8	9	18	18	11	14	4	4	23	40	11	31	16	18	140	5	0	0	0	100	0	0	0	0	6	316
LAS17_YEAST	party	0	1	12	8	27	42	18	9	21	3	11	39	61	112	47	47	1	11	31	24	41	22	40	26	527	2	100	0	0	100	0	0	0	0	5	633
LRP1_YEAST	party	0	1	5	3	7	18	12	5	5	0	5	7	9	4	20	7	0	2	8	31	6	16	10	12	155	3	0	0	0	100	0	0	0	0	4	184
LSM3_YEAST	party	0	1	11	4	7	12	6	2	2	0	2	4	4	2	6	7	2	1	6	2	2	10	4	8	41	3	0	0	0	100	0	0	0	0	8	89
MPP10_YEAST	party	0	1	1	1	33	47	30	9	15	3	11	20	38	21	64	24	1	6	27	57	20	80	27	60	528	7	100	0	0	100	0	0	0	0	3	593
MRE11_YEAST	party	0	1	7	3	47	56	38	16	29	3	13	37	34	38	53	45	7	18	34	54	20	50	44	56	256	7	100	0	0	100	0	0	0	0	6	692
MTR3_YEAST	party	0	1	17	9	12	25	16	8	8	1	7	18	13	8	25	17	5	4	10	13	10	17	16	17	30	6	0	0	0	100	0	0	0	0	4	250
MTW1_YEAST	party	0	1	10	6	19	43	17	6	6	0	8	9	11	7	18	15	2	1	15	32	9	30	16	25	119	10	0	0	0	100	0	0	0	0	3	289
MYO2_YEAST	party	0	1	29	14	94	168	117	29	61	16	58	62	92	40	103	95	14	29	62	134	90	138	94	78	209	21	0	100	0	0	0	0	0	0	6	1574
MYO3_YEAST	party	0	1	108	40	70	85	89	24	46	10	50	71	101	61	101	73	10	24	57	131	55	65	70	79	409	9	100	0	0	0	100	0	0	0	1	1272
MYO5_YEAST	party	0	1	62	31	62	85	86	21	42	10	50	63	109	68	90	71	9	26	70	94	63	69	68	63	316	10	100	0	0	0	100	0	0	0	1	1219
NIC96_YEAST	party	0	1	16	13	36	108	69	15	30	8	34	32	45	23	72	36	5	15	38	65	33	59	67	49	132	11	0	0	0	0	100	0	0	0	5	839
NOG1_YEAST	party	0	1	8	6	40	57	38	19	25	3	19	30	44	24	37	26	7	13	50	58	25	51	34	47	179	11	0	0	0	0	0	100	0	0	7	647
NOP2_YEAST	party	0	1	6	3	33	48	31	11	26	1	16	31	52	27	35	31	7	10	33	57	19	73	28	49	231	4	100	0	0	100	0	0	0	0	6	618
NOP3_YEAST	party	0	1	5	1	18	16	9	5	19	1	20	62	21	51	29	10	1	11	38	8	21	42	14	18	253	3	100	0	0	100	0	0	0	0	5	414
NOP58_YEAST	party	0	1	19	5	23	53	30	9	8	2	14	20	58	8	44	22	1	6	21	77	10	52	16	37	124	6	0	0	0	100	0	0	0	0	3	511
NU100_YEAST	party	0	1	0	0	28	67	27	10	60	1	12	120	40	45	138	92	5	7	14	45	61	19	144	24	552	38	100	0	0	0	100	0	0	0	3	959
NU120_YEAST	party	0	1	1	1	55	150	66	15	71	10	52	34	31	24	96	56	18	27	35	51	42	66	74	64	15	2	0	0	0	0	0	100	0	0	3	1037
NU159_YEAST	party	0	1	13	7	85	97	62	18	87	4	20	81	89	75	209	102	6	19	28	113	58	128	88	91	1030	19	100	0	100	0	0	0	0	0	5	1460
NUG1_YEAST	party	0	1	6	5	30	49	31	9	11	5	11	27	48	22	46	22	2	6	29	55	16	40	24	37	183	9	0	0	0	100	0	0	0	0	9	520
NUP60_YEAST	party	0	1	4	4	31	25	23	6	23	0	15	20	40	35	87	31	0	6	21	52	18	41	46	19	539	1	100	100	0	0	0	0	0	0	4	539
NUP85_YEAST	party	0	1	5	4	44	94	49	21	35	11	31	30	44	26	61	30	12	5	27	43	24	61	38	58	76	9	100	100	0	0	0	0	0	0	4	744
ORC2_YEAST	party	0	1	10	6	30	54	35	17	29	4	19	22	25	34	52	46	3	11	31	62	27	43	47	29	292	6	100	0	0	100	0	0	0	0	5	620
ORC3_YEAST	party	0	1	6	4	28	78	42	14	46	4	24	16	24	17	47	27	4	15	24	46	19	44	50	47	58	7	0	100	0	0	0	0	0	0	2	616
ORC5_YEAST	party	0	1	3	3	22	55	43	7	24	5	25	12	27	21	37	30	7	8	19	31	20	32	28	26	23	4	0	0	0	100	0	0	0	100	4	479
OST1_YEAST	party	0	1	15	7	31	39	31	7	38	9	21	23	27	25	47	32	2	11	13	21	15	33	31	20	6	2	0	0	0	0	100	0	0	100	2	476
OST2_YEAST	party	0	1	7	4	8	16	12	2	17	0	2	4	11	5	8	8	5	2	4	9	5	3	6	3	35	2	0	0	0	0	0	100	0	100	3	130
OST3_YEAST	party	0	1	15	8	20	37	35	9	33	4	9	8	26	21	34	23	5	7	7	21	13	12	14	12	5	1	0	0	0	0	0	0	100	100	5	350
OST6_YEAST	party	0	1	6	4	29	32	31	10	27	5	18	14	17	16	28	15	7	5	6	20	14	10	17	11	1	1	0	0	0	0	0	0	100	100	3	332
OSTB_YEAST	party	0	1	11	5	32	38	27	2	28	9	20	22	16	16	41	27	4	8	17	28	15	30	27	23	11	1	0	0	0	0	100	0	0	100	4	430
PAP2_YEAST	party	0	1	4	3	30	45	46	2	24	5	16	31	32	25	48	32	3	18	25	54	12	54	33	49	252	3	100	0	0	100	0	0	0	0	4	584
PCNA_YEAST	party	0	1	6	3	13	32	24	6	17	0	4	12	13	8	24	12	4	2	8	18	9	19	6	27	8	3	0	0	100	0	0	0	0	0	2	258
PEP3_YEAST	party	0	1	3	3	41	124	88	22	45	19	24	24	21	23	57	53	12	20	24	89	26	61	88	57	31	6	0	100	0	0	0	0	0	0	3	918
PEP5_YEAST	party	0	1	15	7	60	112	91	15	60	4	30	37	40	38	90	57	18	22	42	76	33	74	63	67	50	8	0	100	0	0	0	0	0	0	4	1029
PESC_YEAST	party	0	1	8	5	32	52	37	10	22	4	22	20	37	25	42	22	4	6	26	75	26	70	30	43	295	11	0	0	0	100	0	0	0	0	5	605
PEX10_YEAST	party	0	1	12	7	13	41	22	11	18	4	14	16	15	14	25	15	13	7	19	30	16	21	13	10	41	5	100	0	0	0	100	0	0	100	3	337
PEX13_YEAST	party	0	1	9	5	9	26	25	13	20	4	21	39	25	21	40	21	0	3	16	26	10	25	30	12	219	5	100	0	0	0	0	100	0	100	6	386
PEX14_YEAST	party	0	1	1	1	17	23	25	12	9	4	6	14	26	14	28	15	0	1	12	36	14	37	20	28	298	4	100	0	0	100	0	0	0	0	4	341
PEX5_YEAST	party	0	1	1	1	27	55	28	18	25	8	18	35	39	21	50	23	6	10	22	40	39	54	60	34	182	15	0	100	0	0	0	0	0	0	4	612
PRP46_YEAST	party	0	1	13	11	38	37	22	9	14	12	11	28	26	16	40	34	5	16	23	32	14	25	17	32	9	3	0	100	0	0	0	0	0	0	7	451
PSB4_YEAST	party	0	1	20	8	21	21	18	9	8	3	13	19	23	11	18	16	0	3	13	12	10	11	20	17	10	3	0	100	0	0	0	0	0	0	3	266
PSB5_YEAST	party	0	1	15	8	20	23	16	4	12	6	12	27	25	8	22	16	5	7	13	14	13	15	12	17	34	7	0	0	0	0	0	100	0	0	4	287
PWP2_YEAST	party	0	1	23	8	64	75	55	13	60	14	22	53	58	25	86	52	8	18	44	52	34	61	54	75	92	3	100	100	0	0	0	0	0	0	3	923
RAD3_YEAST	party	0	1	16	9	46	81	57	26	33	4	33	33	38	32	54	42	13	14	49	50	27	71	27	48	48	4	0	0	100	0	0	0	0	0	4	778
RFA1_YEAST	party	0	1	15	11	31	48	41	10	32	7	20	31	47	21	45	36	5	9	33	39	32	37	55	42	79	7	100	0	100	0	0	0	0	0	1	621
RFC2_YEAST	party	0	1	8	6	20	38	25	6	13	3	11	18	23	13	27	22	5	6	18	29	13	21	20	22	22	2	0	0	0	100	0	0	0	0	3	353
RIO2_YEAST	party	0	1	11	5	23	33	22	17	16	1	23	25	16	12	36	13	5	11	26	31	12	34	27	42	105	6	100	0	0	100	0	0	0	0	7	425
RIX1_YEAST	party	0	1	6	3	47	99	66	11	37	6	15	28	28	34	66	42	9	18	24	59	26	73	43	32	189	6	100	0	0	100	0	0	0	0	6	763
RLF2_YEAST	party	0	1	0	0	24	51	26	9	20	5	12	21	24	31	48	32	5	4	33	83	29	76	31	42	535	9	100	0	100	0	0	0	0	0	5	606
RPN1_YEAST	party	0	1	10	7	64	115	56	23	28	6	31	67	76	32	75	54	8	22	25	63	34	98	40	76	170	7	0	100	0	0	0	0	0	0	7	993
RPN2_YEAST	party	0	1	3	2	59	104	55	21	38	5	34	60	88	28	68	56	8	12	33	75	31	60	52	58	120	8	100	0	0	100	0	0	0	0	2	945
RRP6_YEAST	party	0	1	2	2	42	78	50	11	22	7	26	20	42	44	65	25	3	17	43	62	20	56	48	52	278	11	100	0	0	100	0	0	0	0	2	733
RSC1_YEAST	party	0	1	11	8	41	74	63	19	41	8	36	29	38	74	73	58	9	19	48	65	34	63	76	60	523	15	100	100	0	0	0	0	0	0	4	928
RSC2_YEAST	party	0	1	10	7	42	74	51	19	28	9	38	42	37	71	65	52	5	16	66	62	43	55	53	61	450	11	100	100	0	0	0	0	0	0	2	889
RSC3_YEAST	party	0	1	3	2	33	110	74	17	49	5	25	24	29	35	85	49	12	16	34	64	45	53	85	41	220	12	100	0	100	0	0	0	0	0	10	885
RSC58_YEAST	party	0	1	0	0	29	44	36	7	20	5	21	25	15	23	32	30	5	6	24	47	15	37	50	31	178	13	100	0	100	0	0	0	0	0	2	502
RSC7_YEAST	party	0	1	9	7	24	31	26	5	16	2	16	26	21	17	32	24	2	10	29	27	12	47	31	37	180	9	100	0	0	100	0	0	0	0	2	435
RSC8_YEAST	party	0	1	3	3	36	48	33	9	20	5	14	32	25	21	44	26	7	14	21	51	28	57	29	37	277	14	100	0	0	100	0	0	0	0	4	557
RSP5_YEAST	party	0	1	16	12	53	57	32	12	41	13	28	58	38	37	63	74	4	17	58	39	41	51	40	53	105	12	100	100	0	0	0	0	0	0	2	809
RUVB2_YEAST	party	0	1	17	10	32	41	40	12	12	1	8	34	34	12	39	37	2	7	23	32	21	40	15	29	38	5	0	0	0	0	0	100	0	0	5	471
SDA1_YEAST	party	0	1	9	5	41	73	39	23	24	6	13	47	55	19	53	34	8	15	46	76	33	67	36	59	357	10	0	0	0	100	0	0	0	0	2	767
SEC15_YEAST	party	0	1	4	3	35	117	77	24	57	7	26	23	35	33	78	52	7	10	30	63	40	72	62	62	111	11	0	0	0	0	0	100	0	0	2	910
SEC5_YEAST	party	0	1	2	1	32	109	93	14	52	10	32	32	25	27	95	54	14	11	33	72	57	67	91	51	214	16	100	100	0	0	0	0	0	0	3	971
SEC8_YEAST	party	0	1	11	5	37	134	94	23	54	8	27	35	42	33	95	52	7	24	34	85	48	77	105	51	204	16	0	0	0	0	100	0	0	0	1	1065
SEM1_YEAST	party	0	1	5	3	4	4	5	1	3	3	1	1	7	1	4	7	0	0	2	9	4	13	8	12	89	1	100	100	0	0	0	0	0	0	6	89
SFH1_YEAST	party	0	1	17	9	15	37	35	12	15	4	11	18	24	14	27	25	3	13	23	20	21	28	45	36	165	9	100	100	0	0	0	0	0	0	3	426
SGF73_YEAST	party	0	1	5	4	27	38	24	12	12	1	15	44	34	31	71	37	7	18	31	50	73	29	62	41	569	9	100	100	0	0	0	0	0	0	6	657
SGS1_YEAST	party	0	1	7	4	69	103	91	38	50	6	40	62	71	61	147	93	18	33	82	104	67	101	104	107	812	12	100	0	100	0	0	0	0	0	4	1447
SHS1_YEAST	party	0	1	2	2	24	49	36	10	21	1	16	24	26	25	54	34	2	9	32	38	25	55	41	29	264	12	0	0	0	0	0	100	0	0	3	551
SIR2_YEAST	party	0	1	15	7	37	53	41	13	22	3	22	27	29	35	42	30	11	17	19	49	17	26	35	34	168	5	100	100	0	0	0	0	0	0	5	562
SKI7_YEAST	party	0	1	15	7	33	95	63	8	27	5	19	21	24	31	76	46	8	20	17	73	26	49	66	40	229	7	100	100	0	0	0	0	0	0	4	747
SLA1_YEAST	party	0	1	4	4	60	80	47	46	49	11	23	97	91	88	104	106	5	12	49	77	83	74	76	66	1041	19	100	0	0	100	0	0	0	0	8	1244
SLT2_YEAST	party	0	1	18	10	25	48	26	12	25	3	19	24	29	26	25	18	9	13	21	26	46	33	23	33	143	5	100	0	0	100	0	0	0	0	6	484
SMC2_YEAST	party	0	1	4	3	58	134	82	25	34	3	27	47	52	23	86	78	9	16	52	130	60	123	70	61	367	40	0	100	0	0	0	0	0	0	5	1170
SN114_YEAST	party	0	1	32	17	65	116	81	22	38	9	40	59	39	53	80	50	9	17	40	76	33	74	48	59	84	8	100	0	0	100	0	0	0	0	3	1008
SPC42_YEAST	party	0	1	1	1	17	30	16	11	7	0	15	5	11	23	33	18	2	6	24	35	13	28	39	30	341	6	0	0	0	100	0	0	0	0	6	363
SSF1_YEAST	party	0	1	7	3	30	39	23	11	13	0	5	19	21	20	37	20	2	12	30	55	22	44	21	29	277	11	0	0	0	100	0	0	0	0	8	453
STE20_YEAST	party	0	1	4	2	49	62	49	23	17	5	18	45	54	67	120	78	7	21	30	80	30	57	72	55	679	8	100	0	0	100	0	0	0	0	3	939
STT3_YEAST	party	0	1	2	1	55	72	57	22	53	21	37	46	59	26	51	43	5	12	32	32	14	24	19	38	13	1	0	0	0	0	0	0	100	100	8	718
SUI1_YEAST	party	0	1	7	6	5	8	11	3	5	0	2	8	4	3	4	6	2	2	5	11	8	7	6	8	92	6	0	100	0	0	0	0	0	0	1	108
SWD1_YEAST	party	0	1	25	9	27	42	34	5	14	11	15	18	20	18	38	24	10	12	17	19	15	38	20	29	26	2	0	100	0	0	0	0	0	0	6	426
SWD2_YEAST	party	0	1	11	7	16	30	22	6	25	3	14	19	14	16	31	19	8	7	7	21	12	14	24	21	0	0	0	100	0	0	0	0	0	0	8	329
SWM1_YEAST	party	0	1	33	9	4	11	6	5	6	4	6	11	15	6	15	9	0	6	13	3	8	13	17	12	155	4	100	0	0	0	100	0	0	0	1	170
TAP42_YEAST	party	0	1	17	5	13	49	16	7	16	2	12	17	11	8	28	18	2	8	18	32	22	35	24	28	169	8	0	100	0	0	0	0	0	0	2	366
TBA1_YEAST	party	0	1	10	8	35	38	19	8	20	4	19	35	31	21	28	25	11	11	21	22	13	38	21	27	16	2	0	0	0	100	0	0	0	0	8	447
TFB2_YEAST	party	0	1	26	19	31	70	32	16	21	5	16	20	25	18	40	29	2	9	17	42	27	34	31	28	67	5	0	0	0	0	0	100	0	0	3	513
TFB4_YEAST	party	0	1	17	10	26	29	28	6	13	1	10	15	23	15	33	23	9	5	14	30	10	22	13	13	62	7	0	100	0	0	0	0	0	100	4	338
TIM17_YEAST	party	0	1	15	9	10	10	9	5	9	5	1	23	21	11	10	4	4	3	10	5	4	4	5	5	35	5	0	0	0	0	0	100	0	0	9	158
TIM23_YEAST	party	0	1	13	7	8	29	12	6	5	3	5	31	18	11	18	12	3	4	5	14	7	8	12	11	96	7	100	0	0	100	0	0	0	100	7	222
TSR1_YEAST	party	0	1	8	7	48	65	48	15	42	9	25	43	42	35	51	30	5	18	44	67	31	73	38	59	294	7	100	0	0	100	0	0	0	0	5	788
UFE1_YEAST	party	0	1	1	1	19	33	26	11	17	2	9	9	13	5	21	17	4	8	15	30	21	32	31	23	154	9	0	100	0	0	0	0	0	0	6	346
URB1_YEAST	party	0	1	6	2	97	211	152	37	94	25	68	52	68	51	173	105	15	25	64	139	57	117	126	88	61	8	0	0	0	0	0	0	100	0	2	1764
USE1_YEAST	party	0	1	1	1	14	27	13	6	11	0	12	12	13	3	23	13	0	3	12	18	21	18	7	19	127	7	0	0	0	0	0	0	100	0	2	245
VPS20_YEAST	party	0	1	2	2	10	27	11	7	6	0	4	6	8	6	16	11	0	4	10	23	13	27	18	14	205	4	0	0	0	0	0	100	0	0	1	221
VPS33_YEAST	party	0	1	9	4	30	91	57	14	29	8	22	29	22	21	56	46	7	15	25	44	35	49	46	45	60	7	100	100	0	0	0	0	0	0	3	691
VPS41_YEAST	party	0	1	6	5	45	97	95	17	49	12	31	44	34	31	87	53	12	22	31	75	30	70	62	95	120	7	100	0	0	100	0	0	0	0	6	992
VPS54_YEAST	party	0	1	4	4	37	95	74	18	36	6	26	32	40	26	95	46	10	20	47	62	35	65	62	57	244	15	100	100	0	0	0	0	0	0	4	889
YIP1_YEAST	party	0	1	25	8	15	37	17	6	22	2	9	23	12	13	22	15	2	6	2	5	9	4	21	6	24	3	100	0	0	100	0	0	0	100	5	248
YKT6_YEAST	party	0	1	14	8	13	16	13	6	8	1	10	12	13	4	16	11	3	3	8	17	11	18	6	11	76	6	0	0	0	100	0	0	0	0	5	200
YSC84_YEAST	party	0	1	5	2	25	25	17	7	19	4	20	52	38	21	51	26	1	7	40	22	6	19	26	42	141	7	100	0	0	100	0	0	0	100	5	468
ACT_YEAST	date	1	1	5	3	26	25	30	16	14	4	14	29	26	19	31	21	4	10	18	18	14	27	9	20	1	1	0	100	0	0	0	0	0	0	8	375
ADA2_YEAST	date	1	1	0	0	13	39	26	9	18	4	20	19	25	22	31	14	12	12	31	30	22	41	21	25	152	8	100	0	100	0	0	0	0	0	4	434
APC10_YEAST	date	1	1	12	7	17	25	15	8	13	4	7	10	14	15	14	8	3	11	11	12	13	12	16	22	33	8	100	100	0	0	0	0	0	0	6	250
APC11_YEAST	date	1	1	11	8	11	9	12	3	8	3	2	9	7	9	8	7	9	7	9	6	8	13	9	16	122	8	100	0	0	100	0	0	0	0	6	165
BEM1_YEAST	date	1	1	7	4	34	43	33	6	23	5	22	32	29	21	60	35	4	7	19	54	24	30	33	37	188	11	100	100	0	0	0	0	0	0	7	551
BET3_YEAST	date	1	1	9	4	11	23	15	6	8	4	5	8	7	5	14	12	6	2	7	14	5	14	13	14	37	2	0	100	0	0	0	0	0	0	5	193
BET5_YEAST	date	1	0	23	9	8	13	12	4	9	3	10	8	6	2	19	9	3	3	8	9	8	7	12	6	69	4	0	100	0	0	0	0	0	0	2	159
BUD6_YEAST	date	1	1	8	6	45	75	40	21	24	4	13	32	43	34	72	50	5	14	38	77	36	62	51	52	610	16	100	0	0	0	100	0	0	0	3	788
CALM_YEAST	date	1	1	11	8	7	18	8	5	8	0	0	8	12	1	18	4	0	2	3	8	6	18	9	12	146	1	0	100	0	0	0	0	0	0	10	147
CDC24_YEAST	date	1	1	3	3	35	84	62	22	41	6	18	17	37	31	127	46	7	25	34	62	40	54	70	36	277	19	100	0	0	100	0	0	0	0	2	854
CDC25_YEAST	date	1	1	1	1	75	143	102	31	74	12	49	50	74	65	213	107	12	33	66	115	45	94	136	93	859	25	100	0	0	100	0	0	0	0	6	1589
CDC42_YEAST	date	1	1	16	9	22	18	10	2	8	1	7	10	11	13	10	12	7	3	9	13	8	11	4	12	17	2	0	100	0	0	0	0	0	0	8	191
CDK1_YEAST	date	1	1	24	13	18	36	23	5	12	4	13	21	17	17	15	7	4	7	20	22	10	16	8	23	6	1	0	0	0	100	0	0	0	0	6	298
CFT2_YEAST	date	1	1	6	4	57	83	73	11	25	9	24	41	40	36	80	54	10	12	34	81	21	55	54	59	156	9	100	100	0	0	0	0	0	0	4	859
CG13_YEAST	date	1	0	5	5	11	71	32	12	31	5	21	7	42	28	92	43	11	12	22	34	24	16	42	24	228	5	100	0	0	100	0	0	0	0	5	580
DMC1_YEAST	date	1	1	4	4	24	31	22	8	9	0	9	31	21	8	27	20	6	6	19	20	17	27	11	18	22	2	0	0	0	100	0	0	0	0	4	334
FIP1_YEAST	date	1	1	30	10	12	22	14	13	10	2	7	18	18	27	40	20	0	2	11	15	14	18	29	35	283	4	100	0	0	100	0	0	0	0	7	327
FUS3_YEAST	date	1	1	18	8	15	35	32	9	18	3	14	14	20	24	21	16	6	12	21	22	12	24	14	21	25	5	0	0	0	100	0	0	0	0	5	353
GBB_YEAST	date	1	1	22	8	23	28	29	11	12	8	16	25	34	13	54	23	9	8	16	22	21	15	27	29	2	1	0	100	0	0	0	0	0	0	8	423
GCN5_YEAST	date	1	1	4	2	26	31	31	15	19	3	22	24	22	20	15	24	3	9	22	42	16	44	27	24	122	4	100	100	0	0	0	0	0	0	2	439
GIP1_YEAST	date	1	0	2	2	22	46	30	8	30	2	21	19	22	23	83	43	10	13	38	52	20	59	39	59	515	17	100	0	0	0	100	0	0	0	1	639
GSP1_YEAST	date	1	1	8	6	18	17	11	4	12	3	9	14	17	12	6	13	3	4	8	18	11	15	11	13	66	3	0	0	0	0	0	0	100	0	3	219
HFI1_YEAST	date	1	1	8	6	20	53	33	10	13	4	14	27	27	26	47	22	3	10	21	33	11	36	48	30	259	9	100	0	100	0	0	0	0	0	6	488
KSS1_YEAST	date	1	1	19	8	18	41	28	15	14	6	15	11	19	22	24	18	6	10	17	25	11	28	14	26	24	5	0	0	0	100	0	0	0	0	3	368
LSM8_YEAST	date	1	1	6	4	8	11	11	2	4	1	2	4	6	2	6	5	2	1	3	14	1	9	9	8	54	2	0	0	0	100	0	0	0	0	5	109
MED16_YEAST	date	1	1	19	17	51	98	75	21	54	13	36	32	45	46	96	62	14	20	33	74	46	49	63	46	32	9	0	100	0	0	0	0	0	0	4	974
MED17_YEAST	date	1	1	4	3	34	77	59	14	24	2	15	24	21	26	66	28	2	15	27	65	20	63	50	55	277	14	100	0	100	0	0	0	0	0	4	687
MED19_YEAST	date	1	1	25	16	7	14	9	6	8	2	9	14	11	13	24	12	1	3	13	12	20	9	15	18	191	5	100	0	0	100	0	0	0	0	9	220
MED22_YEAST	date	1	1	10	6	8	14	9	5	3	1	1	1	7	1	7	13	1	1	4	8	8	13	9	7	106	2	0	100	0	0	0	0	0	0	4	121
MED2_YEAST	date	1	1	1	1	15	31	13	9	13	1	6	24	18	9	42	30	1	2	8	27	26	34	90	32	381	4	100	0	0	100	0	0	0	0	5	431
MED3_YEAST	date	1	1	6	4	13	33	15	20	8	0	6	20	38	28	32	32	2	8	11	18	41	11	46	15	370	5	100	0	100	0	0	0	0	0	6	397
MED4_YEAST	date	1	1	10	6	14	30	13	6	11	1	5	9	17	12	21	18	2	3	10	27	9	33	14	29	170	9	100	0	0	0	100	0	0	0	1	284
MED7_YEAST	date	1	1	15	6	8	27	13	5	3	1	12	8	6	17	21	10	2	4	9	18	16	21	14	7	138	7	0	0	0	100	0	0	0	0	3	222
MED8_YEAST	date	1	1	12	9	16	25	6	4	9	3	4	8	8	10	25	23	0	5	11	13	13	19	9	12	150	8	0	0	0	0	100	0	0	0	1	223
MOB1_YEAST	date	1	0	16	10	18	25	14	7	20	4	9	15	17	23	16	24	7	11	16	9	20	19	29	11	117	3	100	100	0	0	0	0	0	0	5	314
NCBP1_YEAST	date	1	0	23	8	49	91	69	12	61	11	36	30	43	34	52	47	4	8	38	52	26	75	70	53	65	5	0	0	0	100	0	0	0	0	9	861
NGG1_YEAST	date	1	1	1	1	25	62	38	11	21	5	12	34	34	43	52	40	1	6	30	70	37	60	56	65	617	13	100	0	0	100	0	0	0	0	2	702
NSP1_YEAST	date	1	1	0	0	15	31	15	2	62	2	4	65	84	42	120	70	0	3	3	90	29	47	90	49	662	9	100	0	0	100	0	0	0	0	6	823
PABP_YEAST	date	1	1	10	7	30	38	25	16	27	1	23	42	54	29	36	22	3	9	22	47	41	49	34	29	156	12	100	100	0	0	0	0	0	0	4	577
PAN1_YEAST	date	1	1	1	1	61	90	70	33	47	4	34	98	105	150	148	104	4	11	40	78	151	80	107	65	1360	11	100	0	100	0	0	0	0	0	7	1480
PAP_YEAST	date	1	1	14	9	43	50	38	9	29	7	17	27	38	27	35	29	8	10	30	48	17	40	30	36	85	8	0	0	0	0	0	100	0	0	3	568
PAT1_YEAST	date	1	1	34	19	30	76	55	25	30	4	21	51	50	54	76	37	0	11	37	47	60	44	47	41	504	10	100	0	0	0	100	0	0	0	3	796
PHO85_YEAST	date	1	1	31	12	15	42	14	9	12	5	11	19	12	17	18	19	3	10	13	22	14	18	17	15	6	1	0	100	0	0	0	0	0	0	6	305
POP7_YEAST	date	1	0	9	3	14	11	8	3	3	0	4	6	7	2	9	14	1	6	4	20	6	9	4	9	106	8	0	0	0	100	0	0	0	0	4	140
PP12_YEAST	date	1	1	16	9	15	33	24	7	18	3	13	21	12	16	18	6	12	4	19	19	14	20	13	25	19	2	0	100	0	0	0	0	0	0	7	312
PRP4_YEAST	date	1	1	15	10	27	53	30	12	11	10	8	34	21	11	43	19	4	14	26	25	24	34	25	34	16	3	0	100	0	0	0	0	0	0	6	465
PRP6_YEAST	date	1	0	3	3	39	113	50	17	33	17	29	27	59	36	58	43	11	11	53	77	46	67	54	59	177	9	100	100	0	0	0	0	0	0	8	899
RNA14_YEAST	date	1	1	3	3	28	73	35	17	35	12	40	22	24	18	57	34	8	5	30	54	39	59	54	33	83	3	0	100	0	0	0	0	0	0	2	677
RPB1_YEAST	date	1	1	67	35	117	143	97	44	58	13	58	115	98	124	163	115	21	35	83	93	66	117	71	102	232	12	100	0	0	100	0	0	0	0	5	1733
RPB7_YEAST	date	1	1	10	6	16	12	15	4	11	0	6	14	5	8	15	8	4	4	6	13	7	9	5	9	26	3	0	0	0	100	0	0	0	0	6	171
RU17_YEAST	date	1	1	49	10	11	21	19	3	10	1	19	17	18	24	26	15	1	4	31	24	8	14	16	18	187	8	100	0	0	100	0	0	0	0	6	300
SEC9_YEAST	date	1	1	8	4	22	40	17	18	14	2	25	34	51	26	60	28	0	6	42	39	53	59	71	44	639	3	100	0	0	100	0	0	0	0	4	651
SIN3_YEAST	date	1	1	46	27	69	122	95	24	61	14	49	59	86	98	132	87	9	47	57	105	116	120	90	96	888	30	100	0	0	100	0	0	0	0	5	1536
SKP1_YEAST	date	1	1	37	4	15	13	10	5	5	3	3	5	10	7	17	5	1	4	13	10	3	22	17	26	125	7	0	0	0	100	0	0	0	0	4	194
SNF5_YEAST	date	1	0	19	9	36	71	61	14	18	5	24	39	43	81	64	58	4	18	45	37	151	36	57	43	592	16	100	0	100	0	0	0	0	0	7	905
SPA2_YEAST	date	1	1	0	0	78	102	95	32	32	4	22	52	76	85	173	88	5	25	50	139	62	145	98	103	1265	13	100	0	0	100	0	0	0	0	5	1466
SPC24_YEAST	date	1	1	0	0	12	28	16	3	4	1	5	7	7	5	17	4	0	2	10	24	5	27	17	19	174	4	0	100	0	0	0	0	0	0	3	213
SPH1_YEAST	date	1	0	1	1	39	66	53	13	24	1	12	25	29	27	77	42	7	8	35	56	24	40	43	40	398	13	100	0	0	100	0	0	0	0	4	661
SPO12_YEAST	date	1	1	6	6	5	13	8	4	7	0	4	3	10	5	18	11	1	5	9	22	5	13	19	11	173	1	0	0	100	0	0	0	0	0	6	173
SPT20_YEAST	date	1	1	8	7	23	44	22	18	17	2	17	22	46	35	60	42	2	11	34	39	46	36	70	18	468	9	100	0	0	100	0	0	0	0	5	604
SPT3_YEAST	date	1	1	14	7	16	27	21	12	13	5	3	20	15	11	21	18	2	9	23	32	17	25	18	29	155	8	0	0	100	0	0	0	0	0	4	337
SPT7_YEAST	date	1	1	3	2	51	128	74	28	47	8	34	49	58	39	108	80	6	22	46	129	57	139	104	125	926	21	100	0	100	0	0	0	0	0	1	1332
SPT8_YEAST	date	1	1	12	6	33	49	32	13	10	7	18	52	35	19	58	23	6	15	21	29	22	55	37	68	136	7	100	0	0	100	0	0	0	0	7	602
STE11_YEAST	date	1	1	31	11	38	74	54	15	26	5	15	39	38	25	56	40	8	21	29	58	34	49	52	41	311	12	100	100	0	0	0	0	0	0	7	717
STV1_YEAST	date	1	0	8	4	56	98	62	35	56	15	30	56	50	26	60	48	7	21	39	42	37	60	41	51	47	7	0	0	0	0	0	100	0	100	5	890
TAF10_YEAST	date	1	1	32	7	16	12	9	4	8	0	7	10	19	8	14	9	0	1	10	12	17	15	13	22	149	4	100	0	100	0	0	0	0	0	3	206
TAF13_YEAST	date	1	1	23	7	7	16	4	2	5	0	4	6	12	4	9	11	2	1	9	21	11	17	11	15	140	4	0	0	0	100	0	0	0	0	7	167
TAF1_YEAST	date	1	1	9	7	40	88	73	27	39	9	29	69	51	42	83	56	4	28	43	102	57	71	79	76	656	21	100	0	0	100	0	0	0	0	4	1066
TAF2_YEAST	date	1	1	16	10	99	121	112	33	58	15	47	59	47	56	115	71	26	30	60	112	49	122	88	87	206	11	100	100	0	0	0	0	0	0	3	1407
TAF5_YEAST	date	1	1	22	7	40	65	43	12	30	9	26	52	45	41	78	44	9	18	33	63	35	41	58	56	176	8	0	0	0	100	0	0	0	0	5	798
TAF6_YEAST	date	1	1	15	10	38	66	32	5	21	3	16	23	29	22	39	39	2	10	19	34	25	34	25	34	101	11	100	0	0	100	0	0	0	0	3	516
TAF9_YEAST	date	1	1	18	10	11	19	3	5	2	2	6	13	13	9	10	7	1	3	7	10	10	10	7	9	133	3	0	0	0	100	0	0	0	0	4	157
TBP_YEAST	date	1	1	2	2	16	16	19	5	15	1	6	12	23	11	14	16	2	2	15	22	8	19	8	10	58	1	0	0	100	0	0	0	0	0	3	240
TR120_YEAST	date	1	0	8	6	70	131	126	28	63	12	51	33	43	65	137	82	18	17	50	95	47	78	77	66	126	10	100	0	0	100	0	0	0	0	2	1289
TR130_YEAST	date	1	0	10	6	72	128	89	19	72	12	41	43	36	31	81	46	17	16	44	92	45	91	66	61	17	5	0	0	0	100	0	0	0	0	5	1102
TRA1_YEAST	date	1	1	43	25	191	490	289	90	212	41	130	90	202	163	264	201	37	83	167	243	156	244	243	208	200	15	100	100	0	0	0	0	0	0	1	3744
TRS20_YEAST	date	1	1	20	8	10	13	12	5	10	1	9	14	9	9	13	7	1	5	7	9	7	7	17	10	94	6	0	0	0	0	0	100	0	0	3	175
TRS23_YEAST	date	1	0	25	9	9	19	15	8	11	1	9	11	9	10	18	18	2	2	8	16	13	9	20	11	106	6	0	100	0	0	0	0	0	0	7	219
TRS31_YEAST	date	1	1	12	9	10	27	17	7	17	1	10	17	17	11	37	16	4	6	17	11	17	16	13	12	53	4	0	0	0	100	0	0	0	0	4	283
TRS33_YEAST	date	1	0	8	4	15	27	24	9	12	1	7	13	7	13	24	9	2	8	12	17	17	22	17	12	79	6	0	0	0	100	0	0	0	0	3	268
TRS65_YEAST	date	1	0	10	8	30	61	38	8	26	5	20	21	21	23	66	31	7	10	21	36	24	29	64	19	86	4	100	0	0	100	0	0	0	0	8	560
TRS85_YEAST	date	1	0	7	5	32	81	40	21	37	9	26	19	37	25	68	36	12	17	31	49	24	46	44	44	80	8	0	0	0	0	100	0	0	0	1	698
YTH1_YEAST	date	1	1	26	10	5	14	13	6	12	1	9	10	3	19	11	4	15	7	15	19	7	17	9	12	131	9	100	0	0	0	100	0	0	0	3	208
ABP1_YEAST	date	0	1	16	9	22	31	28	5	17	8	11	22	56	66	51	22	1	4	17	59	20	75	30	47	449	6	100	100	0	0	0	0	0	0	3	592
ADR1_YEAST	date	0	1	53	28	48	147	74	29	75	4	49	46	57	48	151	71	22	37	61	86	37	75	120	86	354	23	100	0	100	0	0	0	0	0	6	1323
AF9_YEAST	date	0	1	9	6	16	14	18	3	11	2	8	9	9	16	14	11	1	6	8	19	6	24	19	12	114	5	0	0	0	100	0	0	0	0	3	226
AME1_YEAST	date	0	1	4	4	13	39	25	5	11	1	8	6	10	13	28	14	1	5	18	22	19	18	28	40	197	8	100	0	100	0	0	0	0	0	3	324
ARP4_YEAST	date	0	1	8	5	28	44	30	5	17	9	16	30	25	28	43	35	7	6	20	37	14	44	27	24	47	6	100	100	0	0	0	0	0	0	4	489
ARP9_YEAST	date	0	1	8	6	22	41	48	5	22	6	13	21	23	19	36	30	4	8	14	36	24	38	27	30	43	4	100	100	0	0	0	0	0	100	2	467
ASK1_YEAST	date	0	1	23	11	14	16	18	6	7	1	2	17	16	15	32	19	2	12	9	14	18	26	23	25	232	2	100	0	0	100	0	0	0	0	6	292
ATG17_YEAST	date	0	1	0	0	25	51	32	6	17	4	12	12	12	5	22	24	4	3	14	43	26	36	33	36	98	11	0	0	0	100	0	0	0	0	5	417
BDF1_YEAST	date	0	1	0	0	28	51	36	18	16	2	20	37	45	45	59	29	2	10	38	60	35	54	47	54	464	7	100	0	0	100	0	0	0	0	3	686
BET1_YEAST	date	0	1	18	8	5	13	8	8	8	3	2	14	8	1	18	10	0	1	8	7	8	5	6	9	124	4	0	0	0	100	0	0	0	0	3	142
BNI1_YEAST	date	0	1	6	4	93	208	75	53	60	10	42	76	113	96	215	103	10	38	84	181	90	170	121	115	1276	23	100	0	0	100	0	0	0	0	4	1953
BNR1_YEAST	date	0	1	24	13	55	179	97	26	56	12	29	38	55	72	137	64	15	26	50	133	58	95	94	84	721	21	100	0	0	0	0	100	0	0	2	1375
BOB1_YEAST	date	0	1	3	2	36	65	44	15	38	6	26	40	50	55	154	70	4	26	44	88	42	69	62	46	784	14	100	100	0	0	0	0	0	0	7	980
BOS1_YEAST	date	0	1	0	0	13	26	14	5	10	2	8	16	15	4	21	13	0	4	10	19	18	16	20	10	112	7	0	0	0	0	0	100	0	0	6	244
BRE2_YEAST	date	0	1	10	6	25	38	31	8	19	5	29	34	22	19	31	23	7	9	27	42	29	43	30	34	122	13	100	0	0	100	0	0	0	0	3	505
CAF40_YEAST	date	0	1	52	16	25	52	17	14	12	2	8	28	18	21	25	22	7	7	19	12	16	16	36	16	97	3	100	0	0	100	0	0	0	0	6	373
CBF1_YEAST	date	0	1	3	2	8	27	14	7	0	2	8	17	29	9	33	21	1	9	19	29	21	42	27	28	327	3	100	0	100	0	0	0	0	0	7	351
CCR4_YEAST	date	0	1	13	6	34	92	34	22	40	10	26	44	51	46	55	51	9	26	25	52	61	35	74	50	121	16	0	100	0	0	0	0	0	0	3	837
CDC13_YEAST	date	0	1	7	4	46	89	64	14	51	4	28	31	48	47	97	48	20	21	45	62	43	59	49	58	203	13	100	0	0	100	0	0	0	0	6	924
CDC14_YEAST	date	0	1	5	4	30	42	34	9	28	4	21	36	37	27	44	29	7	18	31	30	21	28	44	31	193	2	100	0	0	100	0	0	0	0	3	551
CDC20_YEAST	date	0	1	12	8	27	46	43	11	14	11	16	41	36	27	76	45	10	14	34	39	24	28	34	34	130	11	100	0	0	100	0	0	0	0	5	610
CDC31_YEAST	date	0	1	7	4	3	20	12	6	9	0	5	9	7	3	9	4	1	3	8	12	4	21	7	18	152	3	0	100	0	0	0	0	0	0	8	161
CDC3_YEAST	date	0	1	5	4	25	45	36	8	22	3	14	25	16	18	41	16	3	13	17	55	35	56	37	35	255	5	100	0	0	100	0	0	0	0	6	520
CDC48_YEAST	date	0	1	20	14	64	69	51	23	28	3	18	59	81	41	40	39	4	11	51	49	20	73	42	69	118	7	0	0	0	100	0	0	0	0	4	835
CDC5_YEAST	date	0	1	19	13	36	66	51	15	34	5	26	37	32	34	57	34	9	24	43	63	21	51	27	40	210	9	100	100	0	0	0	0	0	0	4	705
CDC6_YEAST	date	0	1	9	4	22	64	39	12	27	1	10	18	25	31	43	40	6	7	26	43	26	25	22	26	80	4	0	0	0	0	0	100	0	0	3	513
CDC73_YEAST	date	0	1	14	11	27	35	24	5	14	7	10	23	17	16	37	22	3	10	20	30	17	26	27	23	107	9	0	100	0	0	0	0	0	0	4	393
CDH1_YEAST	date	0	1	8	8	37	49	26	11	17	9	15	32	31	29	75	39	6	17	36	29	17	25	32	34	128	6	100	0	0	100	0	0	0	0	6	566
CEF1_YEAST	date	0	1	1	1	27	52	29	15	12	4	18	23	42	31	36	28	3	9	35	63	36	64	32	31	456	11	0	0	100	0	0	0	0	0	6	590
CG12_YEAST	date	0	1	1	1	30	47	39	18	21	4	21	24	18	30	60	30	9	12	21	23	31	35	51	21	169	11	100	0	0	100	0	0	0	0	5	545
CG22_YEAST	date	0	1	3	3	26	49	31	11	21	4	14	20	24	19	42	24	5	13	23	40	22	43	35	25	223	3	100	0	100	0	0	0	0	0	6	491
CG23_YEAST	date	0	1	5	2	23	44	28	7	10	8	22	10	31	18	38	17	5	16	26	19	15	39	23	28	147	4	100	0	100	0	0	0	0	0	7	427
CGS5_YEAST	date	0	1	6	3	22	40	27	12	17	5	19	12	31	15	32	17	6	10	25	33	18	34	34	26	146	3	100	0	0	100	0	0	0	0	6	435
CHD1_YEAST	date	0	1	4	2	60	133	79	34	48	18	45	76	79	59	118	76	6	31	87	138	52	131	87	111	616	25	100	0	0	100	0	0	0	0	4	1468
CHL4_YEAST	date	0	1	9	4	28	50	36	10	26	5	18	29	13	23	31	16	4	11	21	40	12	28	31	26	99	4	100	0	0	0	0	100	0	0	6	458
CLF1_YEAST	date	0	1	3	3	34	69	51	12	32	20	36	18	36	18	37	28	4	9	42	60	36	74	28	43	66	8	0	0	0	100	0	0	0	0	1	687
COG2_YEAST	date	0	1	8	5	7	43	20	4	8	0	10	6	6	5	24	17	4	6	9	16	14	26	14	23	22	4	0	0	0	100	0	0	0	0	7	262
CSK22_YEAST	date	0	1	19	11	26	34	23	8	14	5	21	18	13	17	16	16	5	8	15	31	11	20	17	21	38	2	0	0	0	100	0	0	0	0	4	339
CSK2C_YEAST	date	0	1	28	12	17	26	13	8	12	2	14	16	7	11	19	11	6	7	14	19	12	15	5	24	59	2	0	100	0	0	0	0	0	0	4	258
CTF19_YEAST	date	0	1	4	4	16	48	28	9	14	2	11	15	10	8	24	24	7	7	23	29	18	21	30	25	83	4	0	100	0	0	0	0	0	0	5	369
CTR9_YEAST	date	0	1	8	6	33	135	58	20	39	10	42	34	73	23	79	47	7	23	44	113	50	108	74	65	205	5	100	100	0	0	0	0	0	0	3	1077
CWC2_YEAST	date	0	1	9	7	15	34	14	7	18	5	7	25	18	14	25	12	6	5	19	32	11	25	23	24	168	12	100	100	0	0	0	0	0	0	4	339
CYC8_YEAST	date	0	1	1	1	43	71	33	15	11	10	32	29	122	67	69	59	5	22	28	32	166	68	50	34	527	6	100	0	0	0	100	0	0	0	6	966
CYPH_YEAST	date	0	1	23	9	15	8	7	3	12	1	5	23	10	10	9	8	2	4	5	12	4	7	7	10	53	5	0	100	0	0	0	0	0	0	6	162
DCP2_YEAST	date	0	1	12	9	40	86	52	25	35	7	19	37	41	60	129	36	4	15	31	78	53	68	97	57	756	5	100	0	100	0	0	0	0	0	2	970
EAF1_YEAST	date	0	1	3	3	30	92	62	20	23	10	24	30	60	65	96	39	7	21	70	74	69	74	62	54	824	9	100	0	0	100	0	0	0	0	4	982
EAF3_YEAST	date	0	1	15	7	16	46	22	10	8	6	16	25	17	18	51	12	6	8	18	37	18	27	16	24	187	7	100	0	0	100	0	0	0	0	4	401
ELP1_YEAST	date	0	1	6	5	107	130	82	26	56	10	54	60	93	45	100	70	14	24	66	87	51	118	60	96	112	12	0	0	0	100	0	0	0	0	1	1349
EPL1_YEAST	date	0	1	0	0	30	61	52	12	35	4	27	26	37	28	84	38	5	22	55	75	62	62	58	59	513	22	100	0	0	100	0	0	0	0	6	832
ERF3_YEAST	date	0	1	14	9	50	35	32	19	16	4	35	60	43	30	35	39	5	13	18	66	53	57	45	30	225	7	100	0	0	0	0	100	0	0	4	685
ESA1_YEAST	date	0	1	31	12	17	43	33	8	16	7	26	18	13	18	25	28	7	11	27	42	15	32	23	36	96	5	100	100	0	0	0	0	0	0	5	445
EXO84_YEAST	date	0	1	6	2	36	83	45	20	27	4	12	22	34	31	81	38	6	11	43	58	37	46	66	53	324	10	100	0	0	0	0	100	0	0	1	753
FAR1_YEAST	date	0	1	8	7	49	83	47	19	40	10	24	41	26	41	74	52	15	19	32	63	36	61	36	62	408	11	100	0	0	100	0	0	0	0	6	830
FUS1_YEAST	date	0	1	8	4	22	41	35	11	11	7	23	19	19	31	62	49	8	10	21	41	21	25	32	24	356	12	100	0	0	100	0	0	0	0	5	512
GAL4_YEAST	date	0	1	4	3	39	95	56	19	38	12	27	29	43	46	100	66	18	17	36	47	46	40	62	45	241	10	100	0	100	0	0	0	0	0	8	881
GBP2_YEAST	date	0	1	11	8	22	23	17	9	25	2	14	44	19	16	27	17	6	5	50	17	12	33	31	38	174	6	100	0	100	0	0	0	0	0	6	427
GCN4_YEAST	date	0	1	1	1	21	27	9	5	11	1	4	6	19	20	31	20	0	4	13	23	8	24	13	22	277	2	100	0	100	0	0	0	0	0	8	281
GDI1_YEAST	date	0	1	5	4	24	40	36	10	19	3	24	31	21	21	32	24	5	11	16	38	19	31	13	33	26	4	0	100	0	0	0	0	0	0	6	451
GRR1_YEAST	date	0	1	3	2	70	138	80	29	52	7	27	37	37	40	73	71	21	25	72	52	56	60	127	77	98	9	100	0	100	0	0	0	0	0	7	1151
H2AZ_YEAST	date	0	1	13	5	7	17	7	1	1	0	3	15	16	3	12	6	0	4	11	16	3	5	2	5	101	4	0	0	100	0	0	0	0	0	6	134
HOG1_YEAST	date	0	1	8	8	25	37	31	10	22	4	15	22	39	22	20	30	6	16	16	22	24	20	18	36	105	3	100	100	0	0	0	0	0	0	4	435
HOS2_YEAST	date	0	1	13	10	21	48	29	10	24	2	23	30	16	22	34	23	8	16	18	24	9	31	28	36	59	4	0	0	0	100	0	0	0	0	4	452
HOS4_YEAST	date	0	1	11	7	49	83	58	20	29	8	25	46	61	40	95	53	2	21	61	115	36	111	76	94	379	21	0	0	0	100	0	0	0	0	2	1083
HPR1_YEAST	date	0	1	0	0	22	67	54	14	43	10	28	20	34	28	70	35	7	8	37	65	25	76	61	48	282	11	100	100	0	0	0	0	0	0	2	752
HRB1_YEAST	date	0	1	12	10	28	21	18	5	16	1	23	40	19	13	39	17	4	11	60	19	5	29	36	50	189	5	100	0	0	100	0	0	0	0	8	454
HRP1_YEAST	date	0	1	5	4	13	19	14	24	18	3	19	51	24	29	48	29	2	6	28	34	48	26	54	45	381	5	100	0	0	100	0	0	0	0	6	534
HRR25_YEAST	date	0	1	8	7	17	47	26	13	22	4	23	28	21	29	35	20	5	14	32	33	43	27	31	24	207	4	100	100	0	0	0	0	0	0	8	494
HSP71_YEAST	date	0	1	12	8	41	48	40	8	28	1	10	50	60	28	41	45	3	5	26	53	23	51	32	49	71	7	0	100	0	0	0	0	0	0	7	642
HST1_YEAST	date	0	1	19	7	28	56	38	14	27	3	16	20	21	25	30	27	11	14	18	48	18	25	31	33	71	4	0	0	0	100	0	0	0	0	3	503
IMB3_YEAST	date	0	1	2	2	68	132	84	25	43	11	30	38	103	46	82	60	15	16	32	54	50	77	52	71	12	3	0	100	0	0	0	0	0	0	6	1089
IMB4_YEAST	date	0	1	0	0	76	126	80	21	50	3	29	39	120	37	94	59	9	15	31	57	47	101	57	62	23	5	0	0	0	0	100	0	0	0	1	1113
IMB5_YEAST	date	0	1	5	3	75	130	80	18	49	6	27	20	56	28	87	54	17	12	28	59	47	82	59	70	76	4	100	100	0	0	0	0	0	0	2	1004
INO80_YEAST	date	0	1	2	2	59	126	86	37	54	18	34	51	88	38	120	77	9	30	82	127	67	129	141	116	696	12	100	0	100	0	0	0	0	0	2	1489
IQG1_YEAST	date	0	1	8	5	93	151	109	25	74	10	65	46	59	68	135	71	20	26	80	131	57	100	95	80	265	17	100	100	0	0	0	0	0	0	4	1495
KPC1_YEAST	date	0	1	81	35	43	98	71	25	48	13	29	55	64	49	86	73	24	30	56	98	72	87	58	72	486	19	100	0	0	100	0	0	0	0	5	1151
LEO1_YEAST	date	0	1	0	0	21	20	19	5	15	2	10	15	21	13	38	27	2	8	33	29	23	74	30	59	395	6	100	0	100	0	0	0	0	0	6	464
LSB3_YEAST	date	0	1	8	5	23	22	21	4	21	4	18	47	46	22	59	24	1	1	39	21	8	16	19	43	179	3	100	0	0	100	0	0	0	100	6	459
LST8_YEAST	date	0	1	20	10	25	22	15	5	6	9	8	15	21	9	29	24	7	16	18	10	11	11	17	25	0	0	0	100	0	0	0	0	0	0	7	303
MCM16_YEAST	date	0	1	3	3	6	30	15	3	2	1	5	3	6	5	15	11	0	7	9	12	14	21	9	7	122	8	0	0	0	0	100	0	0	0	4	181
MCM1_YEAST	date	0	1	13	8	10	17	10	6	7	0	5	15	15	19	13	12	1	10	8	11	77	18	16	16	218	4	100	0	0	100	0	0	0	0	7	286
MCM21_YEAST	date	0	1	9	5	20	41	32	6	25	3	5	8	13	15	28	11	1	8	16	34	17	34	14	37	137	8	0	0	0	100	0	0	0	0	3	368
MCM2_YEAST	date	0	1	27	13	59	73	55	18	25	3	26	46	52	36	68	36	9	17	77	38	32	86	43	69	220	7	100	0	100	0	0	0	0	0	7	868
MCM3_YEAST	date	0	1	11	9	63	90	57	16	32	3	22	59	77	48	75	64	2	22	67	47	32	68	49	78	218	13	100	0	100	0	0	0	0	0	3	971
MCM7_YEAST	date	0	1	25	14	56	90	52	25	29	1	25	38	54	35	60	55	12	10	46	51	41	55	45	65	78	5	0	0	100	0	0	0	0	0	4	845
MED10_YEAST	date	0	1	11	6	12	12	12	3	4	0	5	7	5	8	12	9	0	2	10	8	11	13	12	12	147	2	0	0	0	100	0	0	0	0	3	157
MED14_YEAST	date	0	1	23	15	57	126	96	33	41	9	30	37	44	43	92	69	9	27	41	75	53	62	96	42	127	10	100	0	0	100	0	0	0	0	1	1082
MED15_YEAST	date	0	1	1	1	46	69	59	33	25	5	13	30	107	55	88	61	4	13	34	77	173	37	118	34	950	12	100	0	0	100	0	0	0	0	4	1081
MED18_YEAST	date	0	1	11	8	17	30	26	10	10	3	10	16	11	14	34	19	2	4	10	14	13	16	29	19	45	2	100	100	0	0	0	0	0	0	5	307
MED1_YEAST	date	0	1	13	9	25	49	44	9	26	5	20	19	19	16	75	31	7	10	16	38	21	44	48	44	170	10	100	0	0	100	0	0	0	0	6	566
MED20_YEAST	date	0	1	14	7	11	24	17	4	7	2	5	13	19	7	21	16	2	4	9	11	5	13	7	13	39	7	0	0	0	0	100	0	0	0	1	210
MED21_YEAST	date	0	1	4	3	9	15	12	4	4	0	1	3	5	4	8	10	2	3	5	14	8	14	6	13	135	3	0	0	0	0	0	0	100	0	2	140
MED31_YEAST	date	0	1	25	8	5	16	8	4	5	4	7	5	5	10	8	5	3	0	2	5	10	10	12	3	45	4	0	0	0	0	100	0	0	0	4	127
MED6_YEAST	date	0	1	14	7	18	20	17	14	10	3	12	23	13	16	22	30	0	2	12	12	16	16	26	13	90	9	100	0	0	100	0	0	0	0	4	295
MED9_YEAST	date	0	1	3	3	2	20	10	1	3	1	3	2	3	8	14	9	1	5	8	11	12	12	14	10	148	1	0	0	0	100	0	0	0	0	4	149
MEX67_YEAST	date	0	1	7	4	36	58	34	21	28	7	16	26	35	33	59	35	1	8	22	36	42	28	53	21	110	10	0	0	0	100	0	0	0	0	1	599
MFT1_YEAST	date	0	1	1	1	24	34	22	4	8	3	9	18	11	6	37	18	1	5	17	37	16	60	20	42	340	8	0	0	0	100	0	0	0	0	6	392
MND2_YEAST	date	0	1	1	1	16	27	18	10	10	3	15	20	16	15	30	9	0	9	33	14	15	41	28	39	316	5	100	0	0	100	0	0	0	0	9	368
MPE1_YEAST	date	0	1	3	3	21	25	22	12	21	4	7	27	20	36	27	39	8	6	24	35	21	34	24	28	270	11	100	0	0	0	100	0	0	0	3	441
MSH2_YEAST	date	0	1	19	12	65	119	71	19	33	7	27	45	52	32	70	46	13	27	29	85	35	78	53	58	44	5	0	100	0	0	0	0	0	0	2	964
MSN5_YEAST	date	0	1	2	1	65	158	94	34	59	24	45	38	54	45	87	57	23	18	53	84	44	83	71	88	80	6	0	0	0	100	0	0	0	0	6	1224
NAM8_YEAST	date	0	1	7	5	31	43	17	17	23	5	19	42	30	22	66	32	6	6	16	17	37	13	65	16	173	5	100	0	0	100	0	0	0	0	6	523
NAP1_YEAST	date	0	1	2	2	16	39	24	4	20	4	10	21	20	22	23	18	4	4	14	28	28	60	19	39	200	7	0	100	0	0	0	0	0	0	6	417
NET1_YEAST	date	0	1	0	0	62	68	60	17	24	2	11	51	67	86	197	73	2	10	44	122	48	74	80	91	1089	4	100	0	0	100	0	0	0	0	4	1189
NOT1_YEAST	date	0	1	34	21	134	275	163	44	115	19	48	58	124	87	159	124	13	34	84	134	130	127	125	111	235	15	100	0	0	100	0	0	0	100	5	2108
NOT2_YEAST	date	0	1	35	13	9	23	6	6	14	4	7	7	7	12	16	13	2	4	11	10	10	13	5	12	93	8	0	0	0	0	0	100	0	0	6	191
NOT5_YEAST	date	0	1	18	6	18	46	28	12	27	6	20	11	16	32	49	28	6	10	25	59	30	53	33	51	444	10	100	100	0	0	0	0	0	0	6	560
NTC20_YEAST	date	0	1	6	4	7	11	11	2	2	0	3	7	5	6	9	8	1	1	8	14	12	13	10	10	140	1	0	0	0	0	0	0	100	0	1	140
NU116_YEAST	date	0	1	0	0	29	64	35	15	73	0	14	156	75	48	119	95	4	7	19	56	110	34	136	24	244	19	100	0	0	100	0	0	0	0	4	1113
NU133_YEAST	date	0	1	5	4	68	131	96	17	69	11	43	39	30	40	98	63	15	23	27	83	48	86	99	71	73	8	0	100	0	0	0	0	0	0	3	1157
NU145_YEAST	date	0	1	10	8	56	134	68	19	68	11	35	84	72	58	154	85	14	12	47	91	53	84	101	71	639	17	100	0	100	0	0	0	0	0	5	1317
NUD1_YEAST	date	0	1	2	2	39	99	36	13	31	7	15	46	35	37	102	60	7	23	23	60	41	41	89	47	378	9	100	0	0	100	0	0	0	0	3	851
NUP2_YEAST	date	0	1	5	3	32	32	19	8	45	0	6	33	59	48	99	60	1	1	15	89	18	54	51	50	652	3	100	100	0	0	0	0	0	0	6	720
NUP42_YEAST	date	0	1	0	0	9	14	11	8	38	0	0	57	46	32	66	49	0	0	3	15	17	5	55	5	430	1	100	0	100	0	0	0	0	0	7	430
NUP49_YEAST	date	0	1	0	0	7	47	24	7	25	0	5	58	37	17	54	40	2	5	6	22	38	14	46	18	351	6	100	0	0	100	0	0	0	0	8	472
NUP57_YEAST	date	0	1	0	0	14	44	22	7	23	5	6	70	32	21	47	58	1	3	12	34	60	23	49	10	409	10	100	0	0	100	0	0	0	0	9	541
NUP84_YEAST	date	0	1	8	5	37	97	64	11	28	9	28	21	36	24	60	32	7	15	27	42	30	72	44	42	49	10	0	100	0	0	0	0	0	0	3	726
OKP1_YEAST	date	0	1	4	2	14	41	23	12	10	2	12	15	13	12	37	19	1	13	24	41	17	49	28	23	215	13	0	0	100	0	0	0	0	0	5	406
ORC6_YEAST	date	0	1	7	5	24	40	26	13	13	5	12	15	14	24	35	22	11	7	27	40	18	36	25	28	243	6	100	0	0	100	0	0	0	0	6	435
PAF1_YEAST	date	0	1	2	2	21	39	26	12	10	3	12	14	16	21	25	24	0	7	23	49	17	51	24	51	253	13	100	0	0	100	0	0	0	0	3	445
PBS2_YEAST	date	0	1	12	10	36	57	38	13	17	2	16	47	41	41	79	42	6	18	30	44	32	34	46	29	368	6	100	100	0	0	0	0	0	0	4	668
PCF11_YEAST	date	0	1	19	9	27	72	34	10	19	6	22	21	22	20	54	42	10	14	19	55	51	40	56	32	419	8	100	0	0	100	0	0	0	0	4	626
PEP12_YEAST	date	0	1	0	0	21	24	24	7	14	2	5	12	18	3	23	13	0	0	18	18	23	31	16	16	146	6	0	100	0	0	0	0	0	0	4	288
PEX7_YEAST	date	0	1	33	15	21	34	22	7	23	11	10	27	21	13	35	20	7	10	18	19	13	14	31	19	1	1	0	100	0	0	0	0	0	0	3	375
PHO4_YEAST	date	0	1	13	6	21	22	11	5	5	2	4	12	26	23	40	22	1	13	18	20	10	20	19	18	292	3	100	0	100	0	0	0	0	0	8	312
POB3_YEAST	date	0	1	12	8	34	42	28	8	27	4	20	32	31	18	42	27	3	7	30	38	30	55	30	46	164	9	100	0	100	0	0	0	0	0	2	552
POP2_YEAST	date	0	1	40	14	24	44	18	17	25	5	15	25	14	27	33	18	1	8	12	17	63	17	32	18	150	4	100	0	0	100	0	0	0	0	5	433
POP4_YEAST	date	0	1	15	12	8	34	23	5	12	2	13	10	8	8	15	14	6	2	16	34	14	15	18	22	92	6	0	0	0	100	0	0	0	0	3	279
PP11_YEAST	date	0	1	18	10	26	29	15	8	16	6	14	22	16	13	15	15	10	9	14	15	13	23	14	18	15	2	0	100	0	0	0	0	0	0	8	311
PRA1_YEAST	date	0	1	20	11	16	24	12	3	14	1	5	12	10	6	16	11	2	1	3	10	9	10	10	1	55	4	0	0	0	0	0	100	0	100	3	176
PRP19_YEAST	date	0	1	11	5	28	50	32	10	15	6	22	21	31	22	44	37	9	5	17	38	18	33	28	37	7	4	0	0	0	0	0	0	100	0	3	503
PRP40_YEAST	date	0	1	5	4	19	54	37	8	20	13	24	14	31	17	37	42	1	12	37	62	29	54	35	37	312	19	100	100	0	0	0	0	0	0	3	583
PTI1_YEAST	date	0	1	5	4	23	40	33	12	14	2	5	16	19	46	39	25	1	4	13	21	34	20	41	17	342	7	100	0	100	0	0	0	0	0	4	425
RAD23_YEAST	date	0	1	1	1	24	29	15	10	11	0	6	30	48	24	29	30	4	2	14	15	25	46	14	22	223	9	100	100	0	0	0	0	0	0	6	398
RAD53_YEAST	date	0	1	8	2	49	68	62	19	32	6	17	56	37	27	73	42	10	15	35	66	57	50	51	49	353	16	100	100	0	0	0	0	0	0	5	821
REF2_YEAST	date	0	1	2	2	23	56	32	11	17	0	12	18	23	32	58	30	3	10	17	73	18	24	39	37	406	12	100	0	0	100	0	0	0	0	7	533
RHO1_YEAST	date	0	1	13	9	23	17	10	2	6	2	7	17	12	8	12	11	7	1	10	16	14	15	7	12	51	3	0	100	0	0	0	0	0	0	7	209
RNA15_YEAST	date	0	1	41	9	18	30	14	7	12	2	6	18	17	16	27	8	4	1	10	15	24	17	35	15	143	7	100	100	0	0	0	0	0	0	2	296
RPB2_YEAST	date	0	1	30	16	61	106	91	40	50	7	46	83	80	53	75	70	17	33	79	74	48	93	41	77	57	12	0	0	0	100	0	0	0	0	6	1224
RPB4_YEAST	date	0	1	14	7	10	28	8	3	7	0	2	7	14	2	12	16	1	6	13	18	12	29	14	19	177	5	0	100	0	0	0	0	0	0	4	221
RPD3_YEAST	date	0	1	21	12	35	28	17	16	19	2	32	39	27	20	21	18	10	14	21	23	6	28	24	33	50	3	0	0	0	100	0	0	0	0	6	433
RSC4_YEAST	date	0	1	4	3	25	68	44	14	31	3	29	23	24	29	44	26	3	13	15	54	30	52	58	40	330	9	100	0	0	100	0	0	0	0	5	625
RSC6_YEAST	date	0	1	24	12	25	55	21	8	8	3	19	26	22	25	38	36	1	9	19	30	23	33	37	45	173	10	100	0	0	100	0	0	0	0	2	483
RSC9_YEAST	date	0	1	11	9	27	81	39	12	27	4	16	19	41	34	54	31	9	7	25	40	21	36	31	27	99	9	100	0	0	0	0	100	0	0	3	581
RSE1_YEAST	date	0	1	36	18	86	147	107	36	60	12	35	61	56	47	125	82	23	40	50	83	49	82	90	90	44	5	100	0	0	100	0	0	0	0	5	1361
RT102_YEAST	date	0	1	16	6	7	11	5	4	2	3	6	9	8	7	15	9	1	1	7	15	10	11	13	13	157	1	0	0	100	0	0	0	0	0	5	157
RTF1_YEAST	date	0	1	2	2	24	38	13	13	23	1	25	24	28	11	37	25	2	9	45	59	27	70	30	54	440	5	0	0	100	0	0	0	0	0	5	558
RUVB1_YEAST	date	0	1	26	12	45	48	34	8	7	0	12	36	36	19	25	33	3	6	24	34	12	43	16	22	30	5	0	0	0	0	0	100	0	0	3	463
RUXF_YEAST	date	0	1	14	5	8	9	4	2	5	0	3	6	3	4	7	4	1	2	4	4	2	7	9	2	33	2	0	0	0	0	100	0	0	0	5	86
SEC4_YEAST	date	0	1	6	3	15	16	19	4	10	2	4	20	11	2	19	15	3	1	7	19	6	12	16	14	58	5	0	0	0	0	0	0	100	0	2	215
SET1_YEAST	date	0	1	21	12	40	83	67	14	38	4	47	45	63	52	107	47	13	34	70	100	41	90	68	57	693	16	100	0	0	100	0	0	0	0	9	1080
SGF11_YEAST	date	0	1	29	8	2	12	8	1	1	0	4	5	5	2	8	8	3	2	9	2	9	5	7	6	89	3	0	0	0	0	100	0	0	0	3	99
SGF29_YEAST	date	0	1	9	5	21	24	8	5	7	3	9	17	13	15	14	16	3	3	18	17	8	26	17	15	87	7	0	0	0	100	0	0	0	0	6	259
SHO1_YEAST	date	0	1	18	8	13	21	33	6	17	7	19	21	29	16	37	27	2	6	18	12	13	13	33	24	166	4	100	0	0	100	0	0	0	100	7	367
SIC1_YEAST	date	0	1	10	7	16	19	11	5	11	1	2	11	12	27	25	20	0	4	23	20	16	27	19	15	284	1	100	0	0	100	0	0	0	0	6	284
SIF2_YEAST	date	0	1	18	10	40	52	38	7	15	12	15	42	27	13	55	27	5	14	15	30	19	37	34	38	29	3	0	100	0	0	0	0	0	0	7	535
SIR3_YEAST	date	0	1	5	5	59	81	87	22	37	9	24	41	40	38	92	47	7	13	41	95	35	89	65	56	406	15	100	0	100	0	0	0	0	0	5	978
SMD2_YEAST	date	0	1	15	10	10	10	10	4	5	1	0	3	4	4	7	4	1	4	9	10	1	12	7	4	63	4	0	0	0	100	0	0	0	0	7	110
SMD3_YEAST	date	0	1	15	4	9	9	7	5	3	0	1	7	5	8	6	6	0	2	7	7	5	5	5	4	48	5	0	0	0	100	0	0	0	0	7	101
SMT3_YEAST	date	0	1	7	4	4	6	8	4	4	0	2	5	6	5	6	5	0	2	6	9	5	12	3	9	91	3	0	0	0	100	0	0	0	0	8	101
SN309_YEAST	date	0	1	25	9	9	16	15	2	4	1	9	6	4	7	9	10	1	2	15	15	9	13	13	15	169	3	0	100	0	0	0	0	0	0	2	175
SNC1_YEAST	date	0	1	13	6	10	9	10	5	3	1	2	4	11	4	9	4	1	2	9	8	4	8	5	8	86	2	0	100	0	0	0	0	0	0	4	117
SNC2_YEAST	date	0	1	10	5	12	8	10	5	3	2	2	5	8	6	9	3	1	1	8	7	4	6	8	7	82	3	0	100	0	0	0	0	0	0	4	115
SNF2_YEAST	date	0	1	10	9	76	163	90	41	52	11	44	75	108	77	118	97	8	37	102	126	109	129	132	108	922	20	100	0	0	100	0	0	0	0	5	1703
SNF6_YEAST	date	0	1	17	11	20	24	12	8	13	1	13	18	26	13	26	17	1	9	19	18	31	23	16	24	173	12	0	100	0	0	0	0	0	0	7	332
SNT1_YEAST	date	0	1	1	1	55	78	59	17	34	8	37	44	67	91	145	79	4	35	74	108	39	101	92	59	1177	7	100	0	0	100	0	0	0	0	5	1226
SNU71_YEAST	date	0	1	1	1	25	59	31	6	24	3	16	17	35	13	66	29	4	17	35	50	26	73	36	55	464	14	0	0	0	100	0	0	0	0	5	620
SP110_YEAST	date	0	1	1	1	26	111	58	16	15	3	23	14	29	14	80	36	2	14	69	122	40	123	78	71	808	10	0	0	0	100	0	0	0	0	6	944
SP382_YEAST	date	0	1	15	8	33	83	50	18	31	13	32	28	17	22	54	39	8	17	28	62	22	65	31	55	159	10	100	0	0	100	0	0	0	0	5	708
SPP1_YEAST	date	0	1	4	4	19	29	20	6	13	7	13	17	8	11	20	17	18	9	20	36	18	30	13	29	180	8	100	0	100	0	0	0	0	0	4	353
SPT16_YEAST	date	0	1	51	20	53	90	69	12	55	11	33	50	50	44	80	47	9	9	51	87	39	96	70	80	233	10	100	100	0	0	0	0	0	0	3	1035
SPT4_YEAST	date	0	1	18	11	9	6	4	5	3	2	2	9	6	6	9	5	6	2	4	5	3	9	3	4	58	4	0	100	0	0	0	0	0	0	6	102
SPT5_YEAST	date	0	1	55	21	61	54	55	16	23	15	23	109	78	39	91	74	3	15	60	73	48	76	58	92	612	18	100	0	0	100	0	0	0	0	7	1063
SRS2_YEAST	date	0	1	22	11	46	123	88	21	49	6	33	42	64	49	106	62	8	25	69	108	43	83	69	80	406	9	100	0	100	0	0	0	0	0	5	1174
SSN2_YEAST	date	0	1	17	9	66	141	101	33	61	12	41	55	65	87	137	78	15	35	38	102	60	82	116	95	630	13	100	0	0	100	0	0	0	0	6	1420
SSN3_YEAST	date	0	1	15	11	32	48	32	16	15	6	27	36	45	25	31	31	5	19	34	41	28	25	33	26	221	7	100	0	0	100	0	0	0	0	4	555
SSN8_YEAST	date	0	1	9	7	15	39	29	6	12	7	18	6	18	16	25	18	7	13	14	17	19	19	11	14	15	4	0	0	0	100	0	0	0	0	2	323
SSO1_YEAST	date	0	1	2	2	27	23	18	5	9	1	7	10	25	4	15	10	1	8	15	21	24	29	18	20	128	7	0	100	0	0	0	0	0	0	6	290
SST2_YEAST	date	0	1	9	6	30	73	44	21	37	6	21	21	29	32	72	53	10	23	24	62	22	36	41	41	204	15	100	100	0	0	0	0	0	0	1	698
SSU72_YEAST	date	0	1	21	10	11	18	11	6	7	2	9	9	10	8	20	6	7	4	9	15	7	13	16	18	49	11	0	0	0	100	0	0	0	0	6	206
STE12_YEAST	date	0	1	30	18	34	48	19	19	33	5	32	28	33	65	68	42	7	9	27	44	38	41	54	42	554	5	100	0	100	0	0	0	0	0	6	688
STH1_YEAST	date	0	1	15	9	59	145	85	24	49	10	30	50	81	44	83	89	6	24	87	129	67	135	71	91	547	29	100	0	0	100	0	0	0	0	4	1359
SUB2_YEAST	date	0	1	13	11	30	39	31	6	21	0	13	25	35	15	23	24	6	11	25	31	20	41	20	30	58	2	0	0	100	0	0	0	0	0	4	446
SWC4_YEAST	date	0	1	22	12	19	50	17	11	21	5	15	12	23	22	52	22	2	8	24	53	27	45	31	17	260	13	100	0	0	100	0	0	0	0	3	476
SWC5_YEAST	date	0	1	4	2	14	27	11	1	5	3	9	20	21	10	28	10	0	4	22	26	20	38	10	24	296	3	100	0	100	0	0	0	0	0	7	303
SWD3_YEAST	date	0	1	21	9	23	33	23	7	13	7	8	24	12	11	34	20	12	11	9	13	10	10	14	21	0	0	0	100	0	0	0	0	0	0	9	315
SWI3_YEAST	date	0	1	0	0	39	55	48	18	25	5	17	35	39	44	80	49	2	14	26	68	41	91	75	54	589	12	100	0	100	0	0	0	0	0	4	825
SWI5_YEAST	date	0	1	8	7	28	59	34	14	22	2	20	37	22	44	83	43	9	13	39	57	34	48	63	38	507	18	100	0	100	0	0	0	0	0	3	709
SWI6_YEAST	date	0	1	4	3	26	96	47	17	22	5	17	40	37	33	66	38	6	18	25	62	37	72	71	68	277	19	0	0	100	0	0	0	0	0	5	803
SWR1_YEAST	date	0	1	5	5	83	158	66	24	63	10	47	60	78	44	115	83	14	41	85	137	72	132	82	120	724	16	100	0	0	100	0	0	0	0	2	1514
SYF1_YEAST	date	0	1	0	0	38	94	66	17	37	19	42	28	45	27	76	41	14	14	43	58	31	85	39	45	41	3	0	100	0	0	0	0	0	0	9	859
T2FA_YEAST	date	0	1	3	1	41	45	29	18	18	4	15	48	46	40	55	44	2	7	44	75	20	76	53	55	679	7	100	0	0	100	0	0	0	0	7	735
T2FB_YEAST	date	0	1	6	4	22	35	16	10	8	3	15	19	18	12	22	19	3	7	26	46	18	46	28	27	276	11	100	0	100	0	0	0	0	0	4	400
TAF11_YEAST	date	0	1	17	10	15	34	23	5	12	4	17	10	9	14	21	24	1	3	12	31	35	24	28	24	205	10	100	0	0	100	0	0	0	0	3	346
TAF14_YEAST	date	0	1	14	7	19	23	16	3	10	3	4	14	11	16	10	25	0	5	9	19	7	25	13	12	70	4	0	0	0	100	0	0	0	0	6	244
TAF3_YEAST	date	0	1	6	4	12	39	22	9	12	3	8	11	20	13	31	23	2	5	18	21	18	33	24	29	225	7	100	100	0	0	0	0	0	0	3	353
TAF4_YEAST	date	0	1	7	2	21	27	18	8	7	1	6	22	32	20	48	21	1	8	22	38	14	24	30	20	315	7	100	0	100	0	0	0	0	0	7	388
TAF7_YEAST	date	0	1	0	0	32	51	32	10	9	3	10	31	32	24	28	17	1	13	24	62	22	106	24	59	488	5	100	0	100	0	0	0	0	0	7	590
TAF8_YEAST	date	0	1	1	1	16	56	30	11	15	3	6	8	29	31	42	43	1	16	18	34	27	55	41	28	404	6	100	0	0	100	0	0	0	0	4	510
TEM1_YEAST	date	0	1	7	4	15	21	26	6	8	1	9	14	13	13	23	15	1	5	10	17	14	9	14	11	58	2	0	0	0	0	0	0	100	100	5	245
TEX1_YEAST	date	0	1	12	9	22	38	32	9	15	8	14	24	16	10	53	30	10	12	12	39	4	15	32	27	34	1	0	100	0	0	0	0	0	0	7	422
TF2B_YEAST	date	0	1	11	6	22	31	26	10	9	1	7	23	23	13	20	23	10	5	16	36	9	23	17	21	74	4	0	0	0	100	0	0	0	0	5	345
TFB1_YEAST	date	0	1	8	6	38	61	40	18	20	3	15	22	31	24	51	38	5	14	26	59	26	42	62	47	271	20	0	0	0	0	100	0	0	0	1	642
TFC4_YEAST	date	0	1	4	3	53	110	56	21	51	11	51	29	71	22	74	33	9	18	67	75	41	102	52	79	143	13	0	100	0	0	0	0	0	0	4	1025
THO2_YEAST	date	0	1	112	43	72	171	111	28	74	15	68	53	77	59	157	82	15	32	80	122	59	118	121	83	508	13	100	0	0	100	0	0	0	0	3	1597
THP2_YEAST	date	0	1	3	3	12	33	15	7	4	3	11	8	11	8	23	13	2	5	14	22	12	26	9	23	129	12	0	100	0	0	0	0	0	0	5	261
TLG1_YEAST	date	0	1	7	4	16	22	16	9	4	1	3	11	8	3	7	12	2	4	12	12	19	23	18	22	184	4	0	100	0	0	0	0	0	0	4	224
TOP2_YEAST	date	0	1	33	24	61	115	116	28	52	15	60	78	65	56	94	83	9	23	60	159	50	133	80	91	340	13	100	0	100	0	0	0	0	0	5	1428
TOR2_YEAST	date	0	1	8	6	136	316	185	58	92	34	74	99	156	101	196	119	31	65	120	163	110	160	134	125	95	13	0	100	0	0	0	0	0	0	4	2474
TUP1_YEAST	date	0	1	28	14	48	60	27	8	13	6	20	34	51	36	70	72	7	14	27	36	61	36	44	43	74	10	0	0	0	0	0	100	0	0	5	713
UBC2_YEAST	date	0	1	12	6	10	11	6	8	7	3	5	4	12	15	10	8	1	3	8	9	3	12	9	28	113	6	0	0	0	100	0	0	0	0	5	172
UBI4P_YEAST	date	0	1	1	1	20	45	35	5	10	0	5	30	5	10	25	35	0	5	20	35	30	25	11	30	2	2	0	0	0	100	0	0	0	0	6	381
UBP8_YEAST	date	0	1	3	2	20	41	37	10	25	5	16	26	16	11	43	20	26	21	10	38	25	23	35	23	9	4	0	0	100	0	0	0	0	0	1	471
VAM3_YEAST	date	0	1	3	2	14	25	23	3	8	0	4	10	9	8	26	16	4	10	13	22	35	26	16	11	195	4	0	0	0	0	100	0	0	0	2	283
VPS71_YEAST	date	0	1	10	6	13	27	16	4	8	1	12	12	7	11	34	19	7	6	21	25	8	14	20	15	209	6	100	100	0	0	0	0	0	0	6	280
XPO1_YEAST	date	0	1	2	2	81	129	80	30	53	12	33	34	64	35	72	61	12	20	38	72	63	80	56	59	30	4	0	0	0	0	0	0	100	0	1	1084
YIF1_YEAST	date	0	1	42	14	20	37	19	11	24	4	15	22	14	16	24	14	3	2	9	14	20	5	28	13	63	2	100	0	0	100	0	0	0	100	7	314
YIP4_YEAST	date	0	1	31	9	20	33	19	6	11	6	7	12	18	11	26	10	4	5	9	7	7	6	7	11	43	3	0	0	0	0	0	0	100	100	2	235
YNG2_YEAST	date	0	1	9	7	15	24	13	4	7	2	6	12	12	14	29	9	9	4	14	35	12	33	15	13	176	10	100	100	0	0	0	0	0	0	1	282
YPT1_YEAST	date	0	1	12	7	14	20	11	5	8	2	9	15	8	1	15	18	4	1	7	18	9	12	12	17	45	3	0	0	0	0	0	0	100	0	5	206
YPT6_YEAST	date	0	1	14	6	9	15	19	4	9	2	8	12	12	4	20	14	3	1	10	21	10	17	9	16	73	5	0	0	0	0	0	0	100	0	5	215
YRA1_YEAST	date	0	1	54	10	16	15	8	5	5	0	2	21	20	15	14	6	0	0	29	22	9	11	17	11	168	5	100	0	100	0	0	0	0	0	7	226

## Sheet: Supp. Table S2
feature_number	feature	MeanDecreaseGini
f23	Disorder_residues	20.2423
f11	A	13.5808
f19	Q	13.1228
f20	E	12.6212
f3	V	11.2859
f12	P	10.3873
f13	S	10.2963
f34	Length	10.2869
f18	K	10.1647
f21	N	9.83938
f4	L	9.74852
f7	F	9.50029
f24	Disorder_stretches	9.35816
f17	R	9.32063
f22	D	9.27124
f5	I	9.15438
f10	G	9.15177
f14	T	8.97494
f16	H	8.70915
f6	M	8.46895
f1	Hotspot_residues	8.32406
f9	Y	8.008
f15	C	7.79625
f8	W	7.55254
f2	Hotspot_stretches	6.92746
f33	LOC_Score	6.86407
f25	Is_NORS	5.33816
f27	Nuclear_DNA_binding	2.33783
f28	Nuclear_not_DNA-binding	2.18641
f32	Membrane	1.87518
f26	Cytoplasmic	1.61384
f30	Mitochondria	1.26784
f29	Extracellular	0.796984
f31	Organellar	0.727094

## Sheet: Supp. Table S3
groups of features	start	end	AUC	maximum_accuracy
hotspots_only	f1	f2	0.51	0.55
amino_acid_composition_only	f3	f22	0.66	0.64
disorder_only	f23	f25	0.64	0.63
sub_cellular_loclalization_only	f26	f33	0.58	0.6
length_only	f34	f34	0.57	0.57

## Sheet: Supp. Table S4
gene_symbol	uniprot	degree	interactors	prediction	uniprot_function_annotation
MSH2	MSH2_HUMAN	10	ATR|BRCA1|BTBD12|CHEK2|ESR1|ESR2|EXO1|MAX|MSH3|MSH6	0.878	Component of the post-replicative DNA mismatch repair system (MMR). Forms two different heterodimers: MutS alpha (MSH2- MSH6 heterodimer) and MutS beta (MSH2-MSH3 heterodimer) which binds to DNA mismatches thereby initiating DNA repair. When bound, heterodimers bend the DNA helix and shields approximately 20 base pairs. MutS alpha recognizes single base mismatches and dinucleotide insertion-delet…
PRKAR1A	KAP0_HUMAN	7	AKAP1|AKAP10|AKAP4|ARFGEF2|GRB2|MYO7A|PRKAR1B	0.868	Regulatory subunit of the cAMP-dependent protein kinases involved in cAMP signaling in cells.
PLD1	PLD1_HUMAN	6	AMPH|CDC42|PEA15|PKN1|RHOA|SNCA	0.862	Implicated as a critical step in numerous cellular pathways, including signal transduction, membrane trafficking, and the regulation of mitosis. May be involved in the regulation of perinuclear intravesicular membrane traffic (By similarity).
PLD2	PLD2_HUMAN	6	ALDOA|AMPH|GAPDH|PLCG1|PRKCD|SRC	0.854	May have a role in signal-induced cytoskeletal regulation and/or endocytosis (By similarity).
MCM7	MCM7_HUMAN	14	CDC45|CDC6|CDC7|HIF1A|MCM2|MCM3|MCM4|MCM5|MCM6|MNAT1|MYC|RB1|UBE3A|VHL	0.842	Acts as component of the MCM2-7 complex (MCM complex) which is the putative replicative helicase essential for 'once per cell cycle' DNA replication initiation and elongation in eukaryotic cells. The active ATPase sites in the MCM2-7 ring are formed through the interaction surfaces of two neighboring subunits such that a critical structure of a conserved arginine finger motif is provided in trans…
ARRB1	ARRB1_HUMAN	7	ARF6|CYTH2|DVL2|MDM2|OPRD1|PTHLH|STAM	0.836	Functions in regulating agonist-mediated G-protein coupled receptor (GPCR) signaling by mediating both receptor desensitization and resensitization processes. During homologous desensitization, beta-arrestins bind to the GPRK-phosphorylated receptor and sterically preclude its coupling to the cognate G- protein; the binding appears to require additional receptor determinants exposed only in the a…
RUVBL2	RUVB2_HUMAN	8	APPL1|APPL2|DPCD|EHMT2|PIH1D1|RPAP3|RUVBL1|YY1	0.836	Proposed core component of the chromatin remodeling INO80 complex which is involved in transcriptional regulation, DNA replication and probably DNA repair.
PSMC5	PRS8_HUMAN	7	ERCC3|NLRC4|PARK2|PSMC3|PSMC4|SP1|TP53	0.834	The 26S protease is involved in the ATP-dependent degradation of ubiquitinated proteins. The regulatory (or ATPase) complex confers ATP dependency and substrate specificity to the 26S complex.
KPNB1	IMB1_HUMAN	13	AMFR|HIST1H1C|NUP153|NUP50|NUP62|RAN|RANBP1|RANBP2|SELS|SMAD3|SMN1|TERF1|TP53	0.834	Functions in nuclear protein import, either in association with an adapter protein, like an importin-alpha subunit, which binds to nuclear localization signals (NLS) in cargo substrates, or by acting as autonomous nuclear transport receptor. Acting autonomously, serves itself as NLS receptor. Docking of the importin/substrate complex to the nuclear pore complex (NPC) is mediated by KPNB1 through …
VCP	TERA_HUMAN	16	AMFR|ANKZF1|ATXN3|BRCA1|COPS5|DERL1|HERPUD1|NFKBIA|NSFL1C|RNF19A|SELS|SYVN1|UBE4B|UBXN6|VCPIP1|WAC	0.834	Necessary for the fragmentation of Golgi stacks during mitosis and for their reassembly after mitosis. Involved in the formation of the transitional endoplasmic reticulum (tER). The transfer of membranes from the endoplasmic reticulum to the Golgi apparatus occurs via 50-70 nm transition vesicles which derive from part-rough, part-smooth transitional elements of the endoplasmic reticulum (tER). V…
GNAI3	GNAI3_HUMAN	8	RGS10|RGS12|RGS14|RGS16|RGS19|RGS5|RIC8A|S1PR1	0.824	Guanine nucleotide-binding proteins (G proteins) are involved as modulators or transducers in various transmembrane signaling systems. G(k) is the stimulatory G protein of receptor- regulated K(+) channels. The active GTP-bound form prevents the association of RGS14 with centrosomes and is required for the translocation of RGS14 from the cytoplasm to the plasma membrane. May play a role in cell d…
NFKB1	NFKB1_HUMAN	22	BCL3|BTRC|E2F1|EP300|HDAC1|HMGA2|IKBKB|ITGB3BP|LYL1|MAP3K8|MEN1|NFKBIA|NFKBIE|NOTCH1|NR3C1|PSMD10|RELA|SP1|STAT3|STAT6|TAB2|TSC22D3	0.824	NF-kappa-B is a pleiotropic transcription factor present in almost all cell types and is the endpoint of a series of signal transduction events that are initiated by a vast array of stimuli related to many biological processes such as inflammation, immunity, differentiation, cell growth, tumorigenesis and apoptosis. NF-kappa-B is a homo- or heterodimeric complex formed by the Rel-like domain-cont…
DDB1	DDB1_HUMAN	22	AMBRA1|CDT1|CUL4A|DCAF11|DCAF12|DCAF15|DCAF16|DCAF17|DCAF4|DCAF5|DCAF6|DCAF8|DDA1|DDB2|DET1|DTL|ERCC8|HIST1H3A|KAT2A|SUPT3H|VPRBP|WDTC1	0.822	Required for DNA repair. Binds to DDB2 to form the UV- damaged DNA-binding protein complex (the UV-DDB complex). The UV- DDB complex may recognize UV-induced DNA damage and recruit proteins of the nucleotide excision repair pathway (the NER pathway) to initiate DNA repair. The UV-DDB complex preferentially binds to cyclobutane pyrimidine dimers (CPD), 6-4 photoproducts (6-4 PP), apurinic sites an…
RET	RET_HUMAN	5	DOK1|DOK5|GRB10|GRB7|SHC1	0.818	Receptor tyrosine-protein kinase involved in numerous cellular mechanisms including cell proliferation, neuronal navigation, cell migration, and cell differentiation upon binding with glial cell derived neurotrophic factor family ligands. Phosphorylates PTK2/FAK1. Regulates both cell death/survival balance and positional information. Required for the molecular mechanisms orchestration during inte…
RUVBL1	RUVB1_HUMAN	7	CTNNB1|EP400|MYC|OFD1|PIH1D1|RUVBL2|YY1	0.818	May be able to bind plasminogen at cell surface and enhance plasminogen activation.
KIT	KIT_HUMAN	13	CRKL|DOK1|GRB10|GRB2|KITLG|LYN|MPDZ|PIK3R1|PTPN11|PTPN6|SOCS1|STAT1|TEC	0.808	Tyrosine-protein kinase that acts as cell-surface receptor for the cytokine KITLG/SCF and plays an essential role in the regulation of cell survival and proliferation, hematopoiesis, stem cell maintenance, gametogenesis, mast cell development, migration and function, and in melanogenesis. In response to KITLG/SCF binding, KIT can activate several signaling pathways. Phosphorylates PIK3R1, PLCG1, …
PICK1	PICK1_HUMAN	14	ACCN2|BNC1|BTG2|ERBB2|GRIA2|GRIA3|GRIA4|GRIK1|GRIK2|GRIK3|GRM3|GRM7|PARK2|SLC6A3	0.806	Probable adapter protein that bind to and organize the subcellular localization of a variety of membrane proteins containing some PDZ recognition sequence. Involved in the clustering of various receptors, possibly by acting at the receptor internalization level. Plays a role in synaptic plasticity by regulating the trafficking and internalization of AMPA receptors. May be regulated upon PRKCA act…
GNAI2	GNAI2_HUMAN	5	EYA2|GPSM2|MDFI|RGS5|RIC8A	0.804	Guanine nucleotide-binding proteins (G proteins) are involved as modulators or transducers in various transmembrane signaling systems. The G(i) proteins are involved in hormonal regulation of adenylate cyclase: they inhibit the cyclase in response to beta-adrenergic stimuli. May play a role in cell division.
COPB1	COPB_HUMAN	6	ARCN1|ARF1|COPA|COPB2|COPG|COPG2	0.804	The coatomer is a cytosolic protein complex that binds to dilysine motifs and reversibly associates with Golgi non- clathrin-coated vesicles, which further mediate biosynthetic protein transport from the ER, via the Golgi up to the trans Golgi network. Coatomer complex is required for budding from Golgi membranes, and is essential for the retrograde Golgi-to-ER transport of dilysine-tagged protei…
EPHA2	EPHA2_HUMAN	5	ACP1|GRB2|PIK3R1|SHC1|SLA	0.802	Receptor tyrosine kinase which binds promiscuously membrane-bound ephrin-A family ligands residing on adjacent cells, leading to contact-dependent bidirectional signaling into neighboring cells. The signaling pathway downstream of the receptor is referred to as forward signaling while the signaling pathway downstream of the ephrin ligand is referred to as reverse signaling. Activated by the ligan…
PHB	PHB_HUMAN	8	ANXA2|E2F1|HDAC1|RAF1|RB1|RBL1|RBL2|TP53	0.802	Prohibitin inhibits DNA synthesis. It has a role in regulating proliferation. As yet it is unclear if the protein or the mRNA exhibits this effect. May play a role in regulating mitochondrial respiration activity and in aging.
GNAI1	GNAI1_HUMAN	6	GPR143|GPSM3|RGS12|RGS14|RIC8A|S1PR1	0.8	Guanine nucleotide-binding proteins (G proteins) are involved as modulators or transducers in various transmembrane signaling systems. The G(i) proteins are involved in hormonal regulation of adenylate cyclase: they inhibit the cyclase in response to beta-adrenergic stimuli. The inactive GDP-bound form prevents the association of RGS14 with centrosomes and is required for the translocation of RGS…
UCHL5	UCHL5_HUMAN	8	ADRM1|ARG1|CTSD|HAUS7|HSPA5|PRDX1|PSMD8|SMAD7	0.794	Protease that specifically cleaves 'Lys-48'-linked polyubiquitin chains. Deubiquitinating enzyme associated with the 19S regulatory subunit of the 26S proteasome. Putative regulatory component of the INO80 complex; however is inactive in the INO80 complex and is activated by a transient interaction of the INO80 complex with the proteasome via ADRM1.
HK3	HXK3_HUMAN	5	GRN|HPGDS|IGFBP4|LEP|ZBTB17	0.79	-
PCNA	PCNA_HUMAN	42	APEX2|ATAD5|CCND1|CCNO|CDC25C|CDKN1A|CDKN1C|CDT1|CHAF1A|DNMT1|DNTT|EGFR|EP300|FANCD2|FANCL|FEN1|GADD45A|GADD45B|GADD45G|HDAC1|HUS1|KCTD13|KIAA0101|MCL1|MSH3|MSH6|MUTYH|PARP1|POLD2|POLD3|POLDIP2|POLH|POLI|POLK|RFC1|RFC2|RFC4|RFC5|SETD8|WRN|XRCC1|YBX1	0.78	Auxiliary protein of DNA polymerase delta and is involved in the control of eukaryotic DNA replication by increasing the polymerase's processibility during elongation of the leading strand. Induces a robust stimulatory effect on the 3'- 5' exonuclease and 3'-phosphodiesterase, but not apurinic- apyrimidinic (AP) endonuclease, APEX2 activities. Has to be loaded onto DNA in order to be able to stim…
AP2B1	AP2B1_HUMAN	6	AP1M2|ARRB2|BUB1B|LDLRAP1|MEA1|TGFBR2	0.778	Component of the adaptor protein complex 2 (AP-2). Adaptor protein complexes function in protein transport via transport vesicles in different membrane traffic pathways. Adaptor protein complexes are vesicle coat components and appear to be involved in cargo selection and vesicle formation. AP-2 is involved in clathrin-dependent endocytosis in which cargo proteins are incorporated into vesicles s…
RFC4	RFC4_HUMAN	5	BRD4|CHTF18|PCNA|RFC3|RFC5	0.778	The elongation of primed DNA templates by DNA polymerase delta and epsilon requires the action of the accessory proteins proliferating cell nuclear antigen (PCNA) and activator 1. This subunit may be involved in the elongation of the multiprimed DNA template.
CUL2	CUL2_HUMAN	11	ARID1B|CAND1|COMMD1|DCUN1D1|NEDD8|RBX1|SAP130|TCEB1|TCEB2|UBE2D1|VHL	0.776	Core component of multiple cullin-RING-based ECS (ElonginB/C-CUL2/5-SOCS-box protein) E3 ubiquitin-protein ligase complexes, which mediate the ubiquitination of target proteins. May serve as a rigid scaffold in the complex and may contribute to catalysis through positioning of the substrate and the ubiquitin- conjugating enzyme. The E3 ubiquitin-protein ligase activity of the complex is dependent…
YWHAZ	1433Z_HUMAN	20	AKT1|BAD|BCAR1|CDC25B|CHAF1A|CSF2RB|EXO1|GP1BA|GP1BB|HMGN1|IL9R|LIMK1|MAPT|PRKCZ|RAF1|REM1|TNFAIP3|TP53|TSC2|VIM	0.77	Adapter protein implicated in the regulation of a large spectrum of both general and specialized signaling pathways. Binds to a large number of partners, usually by recognition of a phosphoserine or phosphothreonine motif. Binding generally results in the modulation of the activity of the binding partner.
PRMT5	ANM5_HUMAN	10	CLNS1A|JAK2|MYOD1|SIN3A|SMARCA2|SMARCA4|SNRPD3|SUPT5H|WDR77|ZNF224	0.768	Arginine methyltransferase that can both catalyze the formation of omega-N monomethylarginine (MMA) and symmetrical dimethylarginine (sDMA), with a preference for the formation of MMA. Specifically mediates the symmetrical dimethylation of arginine residues in the small nuclear ribonucleoproteins Sm D1 (SNRPD1) and Sm D3 (SNRPD3); such methylation being required for the assembly and biogenesis of…
CNTN2	CNTN2_HUMAN	5	HDAC1|KAT2B|NFYB|SUV39H1|UBC	0.766	May play a role in the initial growth and guidance of axons. May be involved in cell adhesion.
CPNE1	CPNE1_HUMAN	6	ACTB|CPNE4|MYCBP2|PPP5C|RDX|UBE2O	0.764	May function in membrane trafficking. Exhibits calcium- dependent phospholipid binding properties.
CDH1	CADH1_HUMAN	10	APC2|CBLL1|CDC27|CTNND1|FYN|IQGAP1|JUP|MDM2|NEDD9|TK1	0.762	Cadherins are calcium-dependent cell adhesion proteins. They preferentially interact with themselves in a homophilic manner in connecting cells; cadherins may thus contribute to the sorting of heterogeneous cell types. CDH1 is involved in mechanisms regulating cell-cell adhesions, mobility and proliferation of epithelial cells. Has a potent invasive suppressor role. It is a ligand for integrin al…
TRPC1	TRPC1_HUMAN	6	HOMER3|ITPR3|PKD2|RHOA|TRPC4|TRPC5	0.762	Thought to form a receptor-activated non-selective calcium permeant cation channel. Probably is operated by a phosphatidylinositol second messenger system activated by receptor tyrosine kinases or G-protein coupled receptors. Seems to be also activated by intracellular calcium store depletion.
YWHAQ	1433T_HUMAN	16	BAD|BAX|CBL|E2F1|HDAC4|HDAC5|HDAC7|MEF2D|MLXIPL|PFKFB2|PRKCZ|PRKD1|RAF1|TERT|UCP3|YWHAE	0.76	Adapter protein implicated in the regulation of a large spectrum of both general and specialized signaling pathways. Binds to a large number of partners, usually by recognition of a phosphoserine or phosphothreonine motif. Binding generally results in the modulation of the activity of the binding partner. Negatively regulates the kinase activity of PDPK1.
RPTOR	RPTOR_HUMAN	5	EIF4EBP1|MTOR|RHEB|RPS6KB1|RRAGA	0.752	Involved in the control of the mammalian target of rapamycin complex 1 (mTORC1) activity which regulates cell growth and survival, and autophagy in response to nutrient and hormonal signals; functions as a scaffold for recruiting mTORC1 substrates. mTORC1 is activated in response to growth factors or amino acids. Growth factor-stimulated mTORC1 activation involves a AKT1- mediated phosphorylation…
TNKS	TNKS1_HUMAN	5	FANCD2|FNBP1|MCL1|TERF1|TNKS1BP1	0.752	Poly-ADP-ribosyltransferase involved in various processes such as Wnt signaling pathway, telomere length and vesicle trafficking. Acts as an activator of the Wnt signaling pathway by mediating poly-ADP-ribosylation (PARsylation) of AXIN1 and AXIN2, 2 key components of the beta-catenin destruction complex: poly-ADP-ribosylated target proteins are recognized by RNF146, which mediates their ubiquiti…
YWHAH	1433F_HUMAN	12	CDC25B|EPB41L3|ING1|KIF5B|KLC3|NR3C1|PDPK1|RIMS1|RIMS2|TLX2|TNFAIP3|ZFP36	0.75	Adapter protein implicated in the regulation of a large spectrum of both general and specialized signaling pathways. Binds to a large number of partners, usually by recognition of a phosphoserine or phosphothreonine motif. Binding generally results in the modulation of the activity of the binding partner. Negatively regulates the kinase activity of PDPK1.
COPS5	CSN5_HUMAN	13	BCL3|CDKN1B|EDNRA|GFER|IKBKB|JUN|MDM2|MIF|S100A7|SMAD4|TP53|UCHL1|VCP	0.746	Probable protease subunit of the COP9 signalosome complex (CSN), a complex involved in various cellular and developmental processes. The CSN complex is an essential regulator of the ubiquitin (Ubl) conjugation pathway by mediating the deneddylation of the cullin subunits of the SCF-type E3 ligase complexes, leading to decrease the Ubl ligase activity of SCF-type complexes such as SCF, CSA or DDB2…
IPO8	IPO8_HUMAN	5	EIF2C1|EIF2C2|EIF2C3|EIF2C4|SRP19	0.746	Seems to function in nuclear protein import, either by acting as autonomous nuclear transport receptor or as an adapter- like protein in association with the importin-beta subunit KPNB1. Acting autonomously, is thought to serve itself as receptor for nuclear localization signals (NLS) and to promote translocation of import substrates through the nuclear pore complex (NPC) by an energy requiring, …
RASA1	RASA1_HUMAN	15	ANXA6|CAV2|DNAJA3|EPHB2|EPHB3|GNB2L1|HCK|HRAS|HTT|IGF1R|KHDRBS1|NCK1|PTK2B|SOCS3|SRC	0.746	Inhibitory regulator of the Ras-cyclic AMP pathway. Stimulates the GTPase of normal but not oncogenic Ras p21; this stimulation may be further increased in the presence of NCK1.
TH1L	NELFD_HUMAN	6	AR|ARAF|COBRA1|RDBP|UBC|UBE3A	0.744	Essential component of the NELF complex, a complex that negatively regulates the elongation of transcription by RNA polymerase II. The NELF complex, which acts via an association with the DSIF complex and causes transcriptional pausing, is counteracted by the P-TEFb kinase complex.
YWHAE	1433E_HUMAN	13	CDC25B|EXO1|HDAC4|HDAC9|IGF1R|IRS1|KCNH2|MAP3K3|NDEL1|NGFRAP1|RAF1|TGFB1|YWHAQ	0.744	Adapter protein implicated in the regulation of a large spectrum of both general and specialized signaling pathways. Binds to a large number of partners, usually by recognition of a phosphoserine or phosphothreonine motif. Binding generally results in the modulation of the activity of the binding partner.
PDGFRB	PGFRB_HUMAN	7	CAV1|CRK|GRB2|NCK2|PDGFRA|PTPN11|SLC9A3R1	0.744	Tyrosine-protein kinase that acts as cell-surface receptor for homodimeric PDGFB and PDGFD and for heterodimers formed by PDGFA and PDGFB, and plays an essential role in the regulation of embryonic development, cell proliferation, survival, differentiation, chemotaxis and migration. Plays an essential role in blood vessel development by promoting proliferation, migration and recruitment of pericy…
RAD51	RAD51_HUMAN	14	ABL1|ATRX|BLM|BRCA1|BRCA2|DMC1|MDC1|PALB2|RAD18|RAD51AP1|RAD52|RAD54B|TP53|WRN	0.742	Participates in a common DNA damage response pathway associated with the activation of homologous recombination and double-strand break repair. Binds to single and double stranded DNA and exhibits DNA-dependent ATPase activity. Underwinds duplex DNA and forms helical nucleoprotein filaments. Plays a role in regulating mitochondrial DNA copy number under conditions of oxidative stress in the prese…
CNOT8	CNOT8_HUMAN	5	BTG1|BTG2|CNOT1|CNOT3|PRMT1	0.742	Ubiquitous transcription factor required for a diverse set of processes. The CCR4-NOT complex functions as general transcription regulation complex.
COBRA1	NELFB_HUMAN	6	BRCA1|ESR1|FOS|JUN|RDBP|TH1L	0.738	Essential component of the NELF complex, a complex that negatively regulates the elongation of transcription by RNA polymerase II. The NELF complex, which acts via an association with the DSIF complex and causes transcriptional pausing, is counteracted by the P-TEFb kinase complex. May be able to induce chromatin unfolding.
YWHAG	1433G_HUMAN	5	EPB41L3|FAM82A2|KIF1C|MDM4|SAMSN1	0.736	Adapter protein implicated in the regulation of a large spectrum of both general and specialized signaling pathways. Binds to a large number of partners, usually by recognition of a phosphoserine or phosphothreonine motif. Binding generally results in the modulation of the activity of the binding partner.
CUL4A	CUL4A_HUMAN	13	CDT1|DCAF11|DCAF4|DCAF5|DCAF6|DDA1|DDB1|DDB2|DET1|DTL|HIST1H3A|RBX1|WDTC1	0.736	Core component of multiple cullin-RING-based E3 ubiquitin-protein ligase complexes which mediate the ubiquitination and subsequent proteasomal degradation of target proteins. As a scaffold protein may contribute to catalysis through positioning of the substrate and the ubiquitin-conjugating enzyme. The E3 ubiquitin-protein ligase activity of the complex is dependent on the neddylation of the cull…
NPHS1	NPHN_HUMAN	6	CASK|CD2AP|CDH3|CTNND1|FYN|NPHS2	0.734	Seems to play a role in the development or function of the kidney glomerular filtration barrier. Regulates glomerular vascular permeability. May anchor the podocyte slit diaphragm to the actin cytoskeleton. Plays a role in skeletal muscle formation through regulation of myoblast fusion (By similarity).
JAK2	JAK2_HUMAN	19	CSF2RB|DNAJA3|EPOR|FYN|GRB2|IL12RB2|IL5RA|IRS1|PRMT5|PTPN11|SH2B1|SOCS1|SOCS3|STAM|STAT5A|STAT5B|TEC|TNFRSF1A|VAV1	0.734	Non-receptor tyrosine kinase involved in various processes such as cell growth, development, differentiation or histone modifications. Mediates essential signaling events in both innate and adaptive immunity. In the cytoplasm, plays a pivotal role in signal transduction via its association with type I receptors such as growth hormone (GHR), prolactin (PRLR), leptin (LEPR), erythropoietin (EPOR), …
YWHAB	1433B_HUMAN	19	CBL|CDC25A|CDC25B|CHAF1A|EPB41L3|EXO1|ITGB1|KCNK3|MAPK7|MLXIP|PRKCZ|PTPN3|RAF1|RPS6KA1|SAMSN1|TESK1|TNFAIP3|TSC2|WEE1	0.734	Adapter protein implicated in the regulation of a large spectrum of both general and specialized signaling pathways. Binds to a large number of partners, usually by recognition of a phosphoserine or phosphothreonine motif. Binding generally results in the modulation of the activity of the binding partner. Negative regulator of osteogenesis. Blocks the nuclear translocation of the phosphorylated f…
NAPA	SNAA_HUMAN	5	NSF|SNAP23|STX1A|STX4|STX5	0.732	Required for vesicular transport between the endoplasmic reticulum and the Golgi apparatus.
CTBP2	CTBP2_HUMAN	12	CBX2|CBX4|CTBP1|FHL3|HGD|HIC1|KLF3|KLF8|MDM2|NRIP1|SOX6|ZFPM2	0.732	Corepressor targeting diverse transcription regulators. Functions in brown adipose tissue (BAT) differentiation (By similarity).
PDGFRA	PGFRA_HUMAN	7	CAV1|CBL|CRK|PDGFC|PDGFRB|PLCG1|SLC9A3R1	0.728	Tyrosine-protein kinase that acts as a cell-surface receptor for PDGFA, PDGFB and PDGFC and plays an essential role in the regulation of embryonic development, cell proliferation, survival and chemotaxis. Depending on the context, promotes or inhibits cell proliferation and cell migration. Plays an important role in the differentiation of bone marrow-derived mesenchymal stem cells. Required for n…
NTRK1	NTRK1_HUMAN	11	ABL1|ARHGAP32|FRS2|GRB2|MATK|NEDD4|PLCG1|SH2B1|SH2B2|SHC1|SQSTM1	0.726	Receptor tyrosine kinase involved in the development and the maturation of the central and peripheral nervous systems through regulation of proliferation, differentiation and survival of sympathetic and nervous neurons. High affinity receptor for NGF which is its primary ligand, it can also bind and be activated by NTF3/neurotrophin-3. However, NTF3 only supports axonal extension through NTRK1 bu…
CPNE4	CPNE4_HUMAN	16	4922501C03RIK|ACTB|ALG2|BCOR|BICD2|CCDC22|CDC42BPB|CENPF|CPNE1|MYCBP2|NONO|PITPNM2|RDX|SKIL|SPNB2|UBE2O	0.724	May function in membrane trafficking. Exhibits calcium- dependent phospholipid binding properties (By similarity).
TAT	ATTY_HUMAN	20	CCNT1|CREBBP|EP300|GRN|IL8|IRF1|MDFIC|MDM2|PBRM1|POLR2A|POLR2B|SATB1|SETDB1|SETDB2|SIRT1|SIRT2|SMARCA2|SMARCA4|SMARCB1|TBP	0.724	Transaminase involved in tyrosine breakdown. Converts tyrosine to p-hydroxyphenylpyruvate. Can catalyze the reverse reaction, using glutamic acid, with 2-oxoglutarate as cosubstrate (in vitro). Has much lower affinity and transaminase activity towards phenylalanine.
GNAQ	GNAQ_HUMAN	6	ADRBK1|BTK|RGS16|RGS4|RIC8A|SLC9A3R1	0.722	Guanine nucleotide-binding proteins (G proteins) are involved as modulators or transducers in various transmembrane signaling systems. Regulates B-cell selection and survival and is required to prevent B-cell-dependent autoimmunity. Regulates chemotaxis of BM-derived neutrophils and dendritic cells (in vitro) (By similarity).
MAP2K1	MP2K1_HUMAN	7	GRB10|MAPK1|MAPK3|MAPK8IP3|MAPKSP1|PEBP4|RAF1	0.722	Dual specificity protein kinase which acts as an essential component of the MAP kinase signal transduction pathway. Binding of extracellular ligands such as growth factors, cytokines and hormones to their cell-surface receptors activates RAS and this initiates RAF1 activation. RAF1 then further activates the dual-specificity protein kinases MAP2K1/MEK1 and MAP2K2/MEK2. Both MAP2K1/MEK1 and MAP2K2…
TRAF5	TRAF5_HUMAN	5	TNFRSF11A|TNFRSF13B|TNFRSF14|TNFRSF4|TNFRSF8	0.72	Adapter protein and signal transducer that links members of the tumor necrosis factor receptor family to different signaling pathways by association with the receptor cytoplasmic domain and kinases. Mediates activation of NF-kappa-B and probably JNK. Seems to be involved in apoptosis.
PPP2R1B	2AAB_HUMAN	5	PPP2CA|PPP2CB|PPP2R2A|PPP2R3B|PPP2R5A	0.716	The PR65 subunit of protein phosphatase 2A serves as a scaffolding molecule to coordinate the assembly of the catalytic subunit and a variable regulatory B subunit.
PRKAG1	AAKG1_HUMAN	5	PRKAA1|PRKAA2|PRKAB1|PRKAB2|PRKAG2	0.716	AMP/ATP-binding subunit of AMP-activated protein kinase (AMPK), an energy sensor protein kinase that plays a key role in regulating cellular energy metabolism. In response to reduction of intracellular ATP levels, AMPK activates energy-producing pathways and inhibits energy-consuming processes: inhibits protein, carbohydrate and lipid biosynthesis, as well as cell growth and proliferation. AMPK a…
SMURF1	SMUF1_HUMAN	11	ARHGEF9|ESR1|JUNB|KLF2|PDLIM7|PLEKHO1|PSME3|RHOA|SMAD1|TRAF4|WFS1	0.712	E3 ubiquitin-protein ligase that acts as a negative regulator of BMP signaling pathway. Mediates ubiquitination and degradation of SMAD1 and SMAD5, 2 receptor-regulated SMADs specific for the BMP pathway. Promotes ubiquitination and subsequent proteasomal degradation of TRAF family members and RHOA.
COPS2	CSN2_HUMAN	8	ING1|ING2|IRF8|NIF3L1|NR0B1|SIN3A|THRA|VDR	0.712	Essential component of the COP9 signalosome complex (CSN), a complex involved in various cellular and developmental processes. The CSN complex is an essential regulator of the ubiquitin (Ubl) conjugation pathway by mediating the deneddylation of the cullin subunits of SCF-type E3 ligase complexes, leading to decrease the Ubl ligase activity of SCF-type complexes such as SCF, CSA or DDB2. The comp…
NMI	NMI_HUMAN	7	BRCA1|HHLA3|IFI35|KAT5|MYC|STAT5A|TUBA3C	0.71	May be involved in augmenting coactivator protein recruitment to a group of sequence-specific transcription factors. Augments cytokine-mediated STAT transcription. Enhances CBP/p300 coactivator protein recruitment to STAT1 and STAT5.
JUP	PLAK_HUMAN	9	APC|CDH1|CTNNA1|CTNNBIP1|DSC1|DSG2|DSP|PKP2|PTPRK	0.71	Common junctional plaque protein. The membrane- associated plaques are architectural elements in an important strategic position to influence the arrangement and function of both the cytoskeleton and the cells within the tissue. The presence of plakoglobin in both the desmosomes and in the intermediate junctions suggests that it plays a central role in the structure and function of submembranous …
RBBP4	RBBP4_HUMAN	11	BCL11B|BRCA1|CHD4|CREBBP|EZH2|GATAD2B|HDAC1|LMNA|RB1|SAP30|SIN3A	0.71	Core histone-binding subunit that may target chromatin assembly factors, chromatin remodeling factors and histone deacetylases to their histone substrates in a manner that is regulated by nucleosomal DNA. Component of several complexes which regulate chromatin metabolism. These include the chromatin assembly factor 1 (CAF-1) complex, which is required for chromatin assembly following DNA replicat…
SIN3B	SIN3B_HUMAN	5	MXD1|REST|RNF220|SUDS3|ZBTB16	0.71	Acts as a transcriptional repressor. Interacts with MXI1 to repress MYC responsive genes and antagonize MYC oncogenic activities. Interacts with MAD-MAX heterodimers by binding to MAD. The heterodimer then represses transcription by tethering SIN3B to DNA. Also forms a complex with FOXK1 which represses transcription (By similarity).
RBBP7	RBBP7_HUMAN	7	BCL11B|BRCA1|CHD4|GATAD2B|RB1|SAP30|SIN3A	0.708	Core histone-binding subunit that may target chromatin remodeling factors, histone acetyltransferases and histone deacetylases to their histone substrates in a manner that is regulated by nucleosomal DNA. Component of several complexes which regulate chromatin metabolism. These include the type B histone acetyltransferase (HAT) complex, which is required for chromatin assembly following DNA repli…
TRAF2	TRAF2_HUMAN	28	BCL10|BIRC2|BIRC3|CASP8AP2|CD40|CHUK|CYLD|ERN2|HIVEP3|IKBKB|MAP3K14|MAP4K2|NGFR|RIPK1|SPHK1|TANK|TNFAIP3|TNFRSF11A|TNFRSF13B|TNFRSF14|TNFRSF1B|TNFRSF4|TNFRSF8|TNFRSF9|TNFSF9|TRADD|TRAIP|ZFAND6	0.706	Regulates activation of NF-kappa-B and JNK and plays a central role in the regulation of cell survival and apoptosis. Required for normal antibody isotype switching from IgM to IgG. Has E3 ubiquitin-protein ligase activity and promotes 'Lys-63'- linked ubiquitination of target proteins, such as BIRC3, RIPK1 and TICAM1. Is an essential constituent of several E3 ubiquitin- protein ligase complexes,…
ITGB1	ITB1_HUMAN	10	FHL2|FLNA|FLNB|ITGA3|ITGB1BP1|LGALS8|MAP4K4|NME1|PXN|YWHAB	0.706	Integrins alpha-1/beta-1, alpha-2/beta-1, alpha-10/beta- 1 and alpha-11/beta-1 are receptors for collagen. Integrins alpha- 1/beta-1 and alpha-2/beta-2 recognize the proline-hydroxylated sequence G-F-P-G-E-R in collagen. Integrins alpha-2/beta-1, alpha- 3/beta-1, alpha-4/beta-1, alpha-5/beta-1, alpha-8/beta-1, alpha- 10/beta-1, alpha-11/beta-1 and alpha-V/beta-1 are receptors for fibronectin. Alp…
PTK2	FAK1_HUMAN	23	BCAR1|BMX|CRK|DCC|GIT1|GRB2|GRB7|IRS1|ITGB3|ITGB5|NCK1|NCK2|NEDD9|NEO1|PIK3R1|PXN|RB1CC1|SRC|STAT1|TGFB1I1|TLN1|TP53|TSC2	0.704	Non-receptor protein-tyrosine kinase that plays an essential role in regulating cell migration, adhesion, spreading, reorganization of the actin cytoskeleton, formation and disassembly of focal adhesions and cell protrusions, cell cycle progression, cell proliferation and apoptosis. Required for early embryonic development and placenta development. Required for embryonic angiogenesis, normal card…
TRPC4	TRPC4_HUMAN	6	ITPR1|ITPR2|ITPR3|SLC9A3R1|TRPC1|TRPC5	0.704	Form a receptor-activated non-selective calcium permeant cation channel. Acts as a cell-cell contact-dependent endothelial calcium entry channel. Probably operated by a phosphatidylinositol second messenger system activated by receptor tyrosine kinases or G-protein coupled receptors. Mediates cation entry, with an enhanced permeability to barium over calcium. May also be activated by intracellula…
KEAP1	KEAP1_HUMAN	5	BCL2|CUL3|ETF1|IKBKB|NFE2L2	0.704	Retains NFE2L2/NRF2 in the cytosol. Functions as substrate adapter protein for the E3 ubiquitin ligase complex formed by CUL3 and RBX1. Targets NFE2L2/NRF2 for ubiquitination and degradation by the proteasome, thus resulting in the suppression of its transcriptional activity and the repression of antioxidant response element-mediated detoxifying enzyme gene expression. May also retain BPTF in the…
STX4	STX4_HUMAN	9	NAPA|RAB4A|SNAP23|SNAP25|STXBP1|STXBP3|STXBP5|VAMP2|VAMP3	0.702	Plasma membrane t-SNARE that mediates docking of transport vesicles. Necessary for the translocation of SLC2A4 from intracellular vesicles to the plasma membrane. Together with STXB3 and VAMP2, may also play a role in docking/fusion of intracellular GLUT4-containing vesicles with the cell surface in adipocytes (By similarity). May also play a role in docking of synaptic vesicles at presynaptic ac…
TERT	TERT_HUMAN	8	MCRS1|MDM2|NCL|PINX1|SMG6|XRCC5|XRCC6|YWHAQ	0.7	Telomerase is a ribonucleoprotein enzyme essential for the replication of chromosome termini in most eukaryotes. Active in progenitor and cancer cells. Inactive, or very low activity, in normal somatic cells. Catalytic component of the teleromerase holoenzyme complex whose main activity is the elongation of telomeres by acting as a reverse transcriptase that adds simple sequence repeats to chromo…
JAK1	JAK1_HUMAN	13	ABL1|ELP2|GNB2L1|GRB2|IL2RB|IL6ST|IRS1|PTPN11|STAM2|STAT3|STAT5A|STAT5B|TNFRSF1A	0.7	Tyrosine kinase of the non-receptor type, involved in the IFN-alpha/beta/gamma signal pathway. Kinase partner for the interleukin (IL)-2 receptor.
SMC3	SMC3_HUMAN	9	CDCA5|FEZ1|KIFAP3|MXD1|MXD3|MXD4|MXI1|RPGR|STAG1	0.698	Central component of cohesin, a complex required for chromosome cohesion during the cell cycle. The cohesin complex may form a large proteinaceous ring within which sister chromatids can be trapped. At anaphase, the complex is cleaved and dissociates from chromatin, allowing sister chromatids to segregate. Cohesion is coupled to DNA replication and is involved in DNA repair. The cohesin complex p…
SUFU	SUFU_HUMAN	6	GLI1|GLI3|GLIS3|PEX26|RCN3|SAP18	0.698	Negative regulator in the hedgehog signaling pathway. Down-regulates GLI1-mediated transactivation of target genes. Part of a corepressor complex that acts on DNA-bound GLI1. May also act by linking GLI1 to BTRC and thereby targeting GLI1 to degradation by the proteasome. Sequesters GLI1, GLI2 and GLI3 in the cytoplasm, this effect is overcome by binding of STK36 to both SUFU and a GLI protein. N…
CUL3	CUL3_HUMAN	11	ABTB2|ARHGEF12|CCNE1|COMMD1|DCUN1D1|KCTD11|KCTD5|KEAP1|KLHDC5|RBX1|SPOP	0.698	Core component of multiple cullin-RING-based BCR (BTB- CUL3-RBX1) E3 ubiquitin-protein ligase complexes which mediate the ubiquitination and subsequent proteasomal degradation of target proteins. As a scaffold protein may contribute to catalysis through positioning of the substrate and the ubiquitin-conjugating enzyme. The E3 ubiquitin-protein ligase activity of the complex is dependent on the ne…
KPNA2	IMA2_HUMAN	7	ARL4A|ITK|LEF1|PLAG1|RECQL|SGK1|SLC2A2	0.696	Functions in nuclear protein import as an adapter protein for nuclear receptor KPNB1. Binds specifically and directly to substrates containing either a simple or bipartite NLS motif. Docking of the importin/substrate complex to the nuclear pore complex (NPC) is mediated by KPNB1 through binding to nucleoporin FxFG repeats and the complex is subsequently translocated through the pore by an energy …
CNOT7	CNOT7_HUMAN	5	BTG1|BTG2|PABPC1|TOB1|TOB2	0.696	Ubiquitous transcription factor required for a diverse set of processes. It is a component of the CCR4 complex involved in the control of gene expression (By similarity).
PLCG1	PLCG1_HUMAN	21	BAG3|CBL|EEF1A1|FLT1|GAB1|GIT1|GRB2|ITK|KHDRBS1|LAT|LCP2|NTRK1|NTRK2|PDGFRA|PECAM1|PLD2|RHOA|SH3BP2|SOS1|SOS2|TUB	0.692	Mediates the production of the second messenger molecules diacylglycerol (DAG) and inositol 1,4,5-trisphosphate (IP3). Plays an important role in the regulation of intracellular signaling cascades. Becomes activated in response to ligand- mediated activation of receptor-type tyrosine kinases, such as PDGFRA, PDGFRB, FGFR1, FGFR2, FGFR3 and FGFR4. Plays a role in actin reorganization and cell migr…
EGFR	EGFR_HUMAN	19	ARF4|CAV1|CAV3|CBLC|CDC25A|CRK|CTNNB1|DCN|GRB2|HDAC6|HSPA4|MAP3K12|MUC1|NCK1|NCK2|PCNA|PTPN6|SOS1|USP8	0.69	Receptor tyrosine kinase binding ligands of the EGF family and activating several signaling cascades to convert extracellular cues into appropriate cellular responses. Known ligands include EGF, TGFA/TGF-alpha, amphiregulin, epigen/EPGN, BTC/betacellulin, epiregulin/EREG and HBEGF/heparin-binding EGF. Ligand binding triggers receptor homo- and/or heterodimerization and autophosphorylation on key …
VIM	VIME_HUMAN	5	DSP|MEN1|PKN1|PLEC|YWHAZ	0.69	Vimentins are class-III intermediate filaments found in various non-epithelial cells, especially mesenchymal cells. Vimentin is attached to the nucleus, endoplasmic reticulum, and mitochondria, either laterally or terminally.
POLR2C	RPB3_HUMAN	5	ATF4|CCHCR1|MYOG|POLR2J|TAF15	0.688	DNA-dependent RNA polymerase catalyzes the transcription of DNA into RNA using the four ribonucleoside triphosphates as substrates. Component of RNA polymerase II which synthesizes mRNA precursors and many functional non-coding RNAs. Pol II is the central component of the basal RNA polymerase II transcription machinery. It is composed of mobile elements that move relative to each other. RPB3 is p…
MCM4	MCM4_HUMAN	7	CDC7|CDT1|MCM2|MCM6|MCM7|SSRP1|SUPT16H	0.686	Acts as component of the MCM2-7 complex (MCM complex) which is the putative replicative helicase essential for 'once per cell cycle' DNA replication initiation and elongation in eukaryotic cells. The active ATPase sites in the MCM2-7 ring are formed through the interaction surfaces of two neighboring subunits such that a critical structure of a conserved arginine finger motif is provided in trans…
CTBP1	CTBP1_HUMAN	24	ACTL6B|CBX4|CREBBP|CTBP2|EP300|FOXP2|HDAC1|HDAC2|HDAC4|HIC1|IKZF1|IKZF4|KAT2B|KDM1A|LCOR|MDM2|MECOM|MLL|NRIP1|PNN|RBBP8|RCOR1|SATB1|TGIF1	0.686	Involved in controlling the equilibrium between tubular and stacked structures in the Golgi complex. Functions in brown adipose tissue (BAT) differentiation. Corepressor targeting diverse transcription regulators such as GLIS2. Has dehydrogenase activity.
ACTN1	ACTN1_HUMAN	7	CDK5R1|CDK5R2|COL17A1|GIPC1|PDLIM1|SSX2IP|ZYX	0.686	F-actin cross-linking protein which is thought to anchor actin to a variety of intracellular structures. This is a bundling protein.
DIABLO	DBLOH_HUMAN	7	BIRC2|BIRC3|BIRC5|BIRC6|BIRC7|NGFRAP1|XIAP	0.684	Promotes apoptosis by activating caspases in the cytochrome c/Apaf-1/caspase-9 pathway. Acts by opposing the inhibitory activity of inhibitor of apoptosis proteins (IAP). Inhibits the activity of BIRC6/bruce by inhibiting its binding to caspases. Isoform 3 attenuates the stability and apoptosis- inhibiting activity of XIAP/BIRC4 by promoting XIAP/BIRC4 ubiquitination and degradation through the u…
IGF1R	IGF1R_HUMAN	15	ARHGEF12|CAMP|CBL|CSK|GRB10|IRS1|MDM2|NEDD4|PIK3R3|PTPN11|RASA1|SHC1|SOCS2|SOCS3|YWHAE	0.684	Receptor tyrosine kinase which mediates actions of insulin-like growth factor 1 (IGF1). Binds IGF1 with high affinity and IGF2 and insulin (INS) with a lower affinity. The activated IGF1R is involved in cell growth and survival control. IGF1R is crucial for tumor transformation and survival of malignant cell. Ligand binding activates the receptor kinase, leading to receptor autophosphorylation, a…
TGFBR1	TGFR1_HUMAN	8	BMPR2|CLU|ENG|FKBP1A|FNTA|HSP90AA1|PPP2R2A|SMAD7	0.684	Transmembrane serine/threonine kinase forming with the TGF-beta type II serine/threonine kinase receptor, TGFBR2, the non-promiscuous receptor for the TGF-beta cytokines TGFB1, TGFB2 and TGFB3. Transduces the TGFB1, TGFB2 and TGFB3 signal from the cell surface to the cytoplasm and is thus regulating a plethora of physiological and pathological processes including cell cycle arrest in epithelial a…
ERBB2	ERBB2_HUMAN	7	CTNNB1|DLG4|ERBB2IP|ERRFI1|PICK1|PIK3R2|STUB1	0.682	Protein tyrosine kinase that is part of several cell surface receptor complexes, but that apparently needs a coreceptor for ligand binding. Essential component of a neuregulin-receptor complex, although neuregulins do not interact with it alone. GP30 is a potential ligand for this receptor. Regulates outgrowth and stabilization of peripheral microtubules (MTs). Upon ERBB2 activation, the MEMO1-RH…
FEN1	FEN1_HUMAN	8	APEX1|BLM|CCNA2|CDK2|EP300|HNRNPA1|PCNA|WRN	0.682	Structure-specific nuclease with 5'-flap endonuclease and 5'-3' exonuclease activities involved in DNA replication and repair. During DNA replication, cleaves the 5'-overhanging flap structure that is generated by displacement synthesis when DNA polymerase encounters the 5'-end of a downstream Okazaki fragment. It enters the flap from the 5'-end and then tracks to cleave the flap base, leaving a …
SMARCA5	SMCA5_HUMAN	7	BAZ1A|BAZ2A|CDT1|CHRAC1|CTNNB1|DNMT3B|POLE3	0.682	Helicase that possesses intrinsic ATP-dependent nucleosome-remodeling activity. Complexes containing SMARCA5 are capable of forming ordered nucleosome arrays on chromatin; this may require intact histone H4 tails. Also required for replication of pericentric heterochromatin in S-phase specifically in conjunction with BAZ1A. Probably plays a role in repression of polI dependent transcription of th…
ACTN4	ACTN4_HUMAN	9	COL17A1|HDAC7|INO80|LRRC7|MAGI1|MEF2A|PDLIM1|SLC9A3R2|TRIM3	0.68	F-actin cross-linking protein which is thought to anchor actin to a variety of intracellular structures. This is a bundling protein. Probably involved in vesicular trafficking via its association with the CART complex. The CART complex is necessary for efficient transferrin receptor recycling but not for EGFR degradation.
CSK	CSK_HUMAN	7	DAB2|DAG1|HNRNPK|IGF1R|JUN|PAG1|YTHDC1	0.68	Non-receptor tyrosine-protein kinase that plays an important role in the regulation of cell growth, differentiation, migration and immune response. Phosphorylates tyrosine residues located in the C-terminal tails of Src-family kinases (SFKs) including LCK, SRC, HCK, FYN, LYN or YES1. Upon tail phosphorylation, Src-family members engage in intramolecular interactions between the phosphotyrosine ta…
DHX9	DHX9_HUMAN	13	ACTA1|AKAP8L|BRCA1|EWSR1|H2AFX|HINFP|HNRNPC|KHDRBS1|NXF1|PRKDC|PRMT1|RELA|SMN1	0.68	Unwinds double-stranded DNA and RNA in a 3' to 5' direction. Alteration of secondary structure may subsequently influence interactions with proteins or other nucleic acids. Functions as a transcriptional activator. Component of the CRD- mediated complex that promotes MYC mRNA stability. Involved with LARP6 in the stabilization of type I collagen mRNAs for CO1A1 and CO1A2.
PRKCD	KPCD_HUMAN	12	C1QBP|CHUK|IKBKB|IRS1|MUC1|NFE2L2|PDPK1|PLD2|PTPN6|RASGRP3|SHC1|SP1	0.676	Calcium-independent, phospholipid- and diacylglycerol (DAG)-dependent serine/threonine-protein kinase that plays contrasting roles in cell death and cell survival by functioning as a pro-apoptotic protein during DNA damage-induced apoptosis, but acting as an anti-apoptotic protein during cytokine receptor- initiated cell death, is involved in tumor suppression as well as survival of several cance…
RIC8A	RIC8A_HUMAN	7	GNA13|GNAI1|GNAI2|GNAI3|GNAO1|GNAQ|GNAS	0.674	Guanine nucleotide exchange factor (GEF), which can activate some, but not all, G-alpha proteins. Able to activate GNAI1, GNAO1 and GNAQ, but not GNAS by exchanging bound GDP for free GTP. Involved in regulation of microtubule pulling forces during mitotic movement of chromosomes by stimulating G(i)-alpha protein, possibly leading to release G(i)-alpha-GTP and NuMA proteins from the NuMA-GPSM2-G(…
PRKG1	KGP1_HUMAN	5	GTF2I|ITPR1|MRVI1|RGS2|TNNT1	0.672	Serine/threonine protein kinasethat acts as key mediator of the nitric oxide (NO)/cGMP signaling pathway. GMP binding activates PRKG1, which phosphorylates serines and threonines on many cellular proteins. Numerous protein targets for PRKG1 phosphorylation are implicated in modulating cellular calcium, but the contribution of each of these targets may vary substantially among cell types. Proteins…
TNFRSF11A	TNR11_HUMAN	5	TRAF1|TRAF2|TRAF3|TRAF5|TRAF6	0.672	Receptor for TNFSF11/RANKL/TRANCE/OPGL; essential for RANKL-mediated osteoclastogenesis. Involved in the regulation of interactions between T-cells and dendritic cells.
PRMT1	ANM1_HUMAN	21	BRCA1|BTG1|BTG2|CNOT8|DHX9|FBL|FUS|HIST2H4A|HNF4A|HNRNPA1|HNRNPK|HNRNPR|IFNAR1|ILF3|KHDRBS1|NRIP1|RELA|STAT5A|SUPT5H|TERF2|YY1	0.67	Arginine methyltransferase that methylates (mono and asymmetric dimethylation) the guanidino nitrogens of arginyl residues present in proteins such as ESR1, histone H2, H3 and H4, PIAS1, HNRNPA1, HNRNPD, NFATC2IP, SUPT5H, TAF15 and EWS. Constitutes the main enzyme that mediates monomethylation and asymmetric dimethylation of histone H4 'Arg-4' (H4R3me1 and H4R3me2a, respectively), a specific tag …
GSK3B	GSK3B_HUMAN	15	AKAP11|AKT1|AR|AXIN1|CTNNB1|DNM1L|EPM2A|MUC1|NOTCH1|NOTCH2|SGK3|SMAD3|SNAI1|SNCAIP|TSC2	0.67	Constitutively active protein kinase that acts as a negative regulator in the hormonal control of glucose homeostasis, Wnt signaling and regulation of transcription factors and microtubules, by phosphorylating and inactivating glycogen synthase (GYS1 or GYS2), EIF2B, CTNNB1/beta-catenin, APC, AXIN1, DPYSL2/CRMP2, JUN, NFATC1/NFATC, MAPT/TAU and MACF1. Requires primed phosphorylation of the majori…
HDAC6	HDAC6_HUMAN	16	AURKA|CTTN|CYLD|EGFR|FNTA|FNTB|G3BP1|LCOR|MAPT|MIIP|NR3C1|PKN1|PPP1CC|SYK|TUBB2B|ZBTB16	0.67	Responsible for the deacetylation of lysine residues on the N-terminal part of the core histones (H2A, H2B, H3 and H4). Histone deacetylation gives a tag for epigenetic repression and plays an important role in transcriptional regulation, cell cycle progression and developmental events. Histone deacetylases act via the formation of large multiprotein complexes (By similarity). Plays a central rol…
H3F3A	H33_HUMAN	5	CARM1|CBX3|CBX5|DAXX|PARP1	0.668	Variant histone H3 which replaces conventional H3 in a wide range of nucleosomes in active genes. Constitutes the predominant form of histone H3 in non-dividing cells and is incorporated into chromatin independently of DNA synthesis. Deposited at sites of nucleosomal displacement throughout transcribed genes, suggesting that it represents an epigenetic imprint of transcriptionally active chromati…
AP1G1	AP1G1_HUMAN	5	AP1B1|AP1S1|RABEP1|SYNRG|SYP	0.668	Subunit of clathrin-associated adaptor protein complex 1 that plays a role in protein sorting in the late-Golgi/trans-Golgi network (TGN) and/or endosomes. The AP complexes mediate both the recruitment of clathrin to membranes and the recognition of sorting signals within the cytosolic tails of transmembrane cargo molecules.
INSR	INSR_HUMAN	6	ENPP1|GRB10|GRB7|PTPN11|SH2B1|SMAD2	0.668	Receptor tyrosine kinase which mediates the pleiotropic actions of insulin. Binding of insulin leads to phosphorylation of several intracellular substrates, including, insulin receptor substrates (IRS1, 2, 3, 4), SHC, GAB1, CBL and other signaling intermediates. Each of these phosphorylated proteins serve as docking proteins for other signaling proteins that contain Src- homology-2 domains (SH2 d…
FGFR1	FGFR1_HUMAN	5	FDPS|FRS2|GRB14|NEDD4|SHB	0.664	Tyrosine-protein kinase that acts as cell-surface receptor for fibroblast growth factors and plays an essential role in the regulation of embryonic development, cell proliferation, differentiation and migration. Required for normal mesoderm patterning and correct axial organization during embryonic development, normal skeletogenesis and normal development of the gonadotropin-releasing hormone (Gn…
RAPGEF1	RPGF1_HUMAN	5	BCAR1|CRK|CRKL|GRB2|HCK	0.664	Guanine nucleotide-releasing protein that binds to SH3 domain of CRK and GRB2/ASH. Transduces signals from CRK to activate RAS.
HIST1H3A	H31_HUMAN	30	AIRE|ANP32A|ASF1A|AURKB|CBX1|CBX3|CBX5|CTCFL|CUL4A|DDB1|EHMT2|EP300|ERCC6|EZH2|GSG2|KDM1A|KDM4A|MYOD1|NASP|PELP1|PHF8|RCOR1|RTT109|SET|SETDB1|TAF1A|TAF1B|UHRF1|WDR5|WWC1	0.662	Core component of nucleosome. Nucleosomes wrap and compact DNA into chromatin, limiting DNA accessibility to the cellular machineries which require DNA as a template. Histones thereby play a central role in transcription regulation, DNA repair, DNA replication and chromosomal stability. DNA accessibility is regulated via a complex set of post-translational modifications of histones, also called h…
MAPK9	MK09_HUMAN	5	HDAC9|MAPK8IP1|MAPK8IP2|TOB1|TP53	0.66	Serine/threonine-protein kinase involved in various processes such as cell proliferation, differentiation, migration, transformation and programmed cell death. Extracellular stimuli such as proinflammatory cytokines or physical stress stimulate the stress-activated protein kinase/c-Jun N-terminal kinase (SAP/JNK) signaling pathway. In this cascade, two dual specificity kinases MAP2K4/MKK4 and MAP…
RBL1	RBL1_HUMAN	9	BEGAIN|BRF1|CCNA2|DHX30|E2F1|HDAC1|MYBL2|PHB|SMAD3	0.66	Key regulator of entry into cell division. Directly involved in heterochromatin formation by maintaining overall chromatin structure and, in particular, that of constitutive heterochromatin by stabilizing histone methylation. Recruits and targets histone methyltransferases SUV420H1 and SUV420H2, leading to epigenetic transcriptional repression. Controls histone H4 'Lys-20' trimethylation. Probabl…
RAB6A	RAB6A_HUMAN	6	BICD1|BICD2|DCTN1|ERC1|KIF20A|SYTL5	0.658	Protein transport. Regulator of membrane traffic from the Golgi apparatus towards the endoplasmic reticulum (ER). Has a low GTPase activity.
RAB11A	RB11A_HUMAN	5	RAB11FIP1|RAB11FIP2|RAB11FIP3|RAB11FIP4|RAB11FIP5	0.658	Regulates endocytic recycling. May exert its functions by interacting with multiple effector proteins in different complexes. Acts as a major regulator of membrane delivery during cytokinesis. Together with MYO5B and RAB8A participates in epithelial cell polarization. Together with RAB3IP, RAB8A, the exocyst complex, PARD3, PRKCI, ANXA2, CDC42 and DNMBP promotes transcytosis of PODXL to the apica…
DNMT3A	DNM3A_HUMAN	16	CBX4|DNMT1|DNMT3B|DNMT3L|EZH2|HDAC1|HIST1H3E|MYC|PIAS1|PIAS2|SPI1|SUV39H1|TDG|UBE2I|UHRF1|ZNF238	0.658	Required for genome-wide de novo methylation and is essential for the establishment of DNA methylation patterns during development. DNA methylation is coordinated with methylation of histones. It modifies DNA in a non-processive manner and also methylates non-CpG sites. May preferentially methylate DNA linker between 2 nucleosomal cores and is inhibited by histone H1. Plays a role in paternal and…
CCND1	CCND1_HUMAN	20	AR|BRCA1|CCNDBP1|CDK4|CDK6|CDKN1A|CDKN1B|CRYAB|ESR1|FBXO31|FBXO4|FBXW8|INSM1|MYBL2|NCOA1|PCNA|RB1|STAT3|TAF1|THRB	0.658	Regulatory component of the cyclin D1-CDK4 (DC) complex that phosphorylates and inhibits members of the retinoblastoma (RB) protein family including RB1 and regulates the cell-cycle during G(1)/S transition. Phosphorylation of RB1 allows dissociation of the transcription factor E2F from the RB/E2F complex and the subsequent transcription of E2F target genes which are responsible for the progressi…
ARRB2	ARRB2_HUMAN	9	ADRB2|AP2B1|CYTH2|ITCH|MDM2|PARK2|RALGDS|UBC|USP33	0.656	Functions in regulating agonist-mediated G-protein coupled receptor (GPCR) signaling by mediating both receptor desensitization and resensitization processes. During homologous desensitization, beta-arrestins bind to the GPRK-phosphorylated receptor and sterically preclude its coupling to the cognate G- protein; the binding appears to require additional receptor determinants exposed only in the a…
MET	MET_HUMAN	6	CBL|GLMN|GRB2|HGF|RANBP10|RANBP9	0.656	Receptor tyrosine kinase that transduces signals from the extracellular matrix into the cytoplasm by binding to hepatocyte growth factor/HGF ligand. Regulates many physiological processes including proliferation, scattering, morphogenesis and survival. Ligand binding at the cell surface induces autophosphorylation of MET on its intracellular domain that provides docking sites for downstream signa…
PKN1	PKN1_HUMAN	10	AKAP9|CCDC85B|HDAC6|NEFH|NEFL|NEUROD2|PDPK1|PLD1|RHOA|VIM	0.656	PKC-related serine/threonine-protein kinase involved in various processes such as regulation of the intermediate filaments of the actin cytoskeleton, cell migration, tumor cell invasion and transcription regulation. Regulates the cytoskeletal network by phosphorylating proteins such as VIM and neurofilament proteins NEFH, NEFL and NEFM, leading to inhibit their polymerization. Phosphorylates 'Ser…
HSPA1A	HSP71_HUMAN	8	FANCC|GPR37|HSF1|MAP3K5|MSR1|PARK2|SNCA|STUB1	0.656	In cooperation with other chaperones, Hsp70s stabilize preexistent proteins against aggregation and mediate the folding of newly translated polypeptides in the cytosol as well as within organelles. These chaperones participate in all these processes through their ability to recognize nonnative conformations of other proteins. They bind extended peptide segments with a net hydrophobic character ex…
STX1A	STX1A_HUMAN	12	CFTR|CPLX1|NAPA|RNF40|SCNN1G|SLC6A1|SNAP23|SNAP25|STXBP1|SYTL4|VAMP2|VAMP8	0.654	Potentially involved in docking of synaptic vesicles at presynaptic active zones. May play a critical role in neurotransmitter exocytosis. May mediate Ca(2+)-regulation of exocytosis acrosomal reaction in sperm.
PPP2R1A	2AAA_HUMAN	5	PPP2CA|PPP2CB|PPP2R2A|PPP2R3B|PPP2R5A	0.654	The PR65 subunit of protein phosphatase 2A serves as a scaffolding molecule to coordinate the assembly of the catalytic subunit and a variable regulatory B subunit. Required for proper chromosome segregation and for centromeric localization of SGOL1 in mitosis.
SART3	SART3_HUMAN	6	AR|LSM7|PRPF3|PRPF4|RNPS1|USP4	0.654	Regulates Tat transactivation activity through direct interaction. May be a cellular factor for HIV-1 gene expression and viral replication.
NOS1	NOS1_HUMAN	5	DLG4|NOS1AP|STUB1|SUMO1|ZDHHC23	0.652	Produces nitric oxide (NO) which is a messenger molecule with diverse functions throughout the body. In the brain and peripheral nervous system, NO displays many properties of a neurotransmitter. Probably has nitrosylase activity and mediates cysteine S-nitrosylation of cytoplasmic target proteins such SRR.
IQGAP1	IQGA1_HUMAN	5	CDC42|CDH1|CLIP1|RAC1|S100B	0.65	Binds to activated CDC42 but does not stimulate its GTPase activity. It associates with calmodulin. Could serve as an assembly scaffold for the organization of a multimolecular complex that would interface incoming signals to the reorganization of the actin cytoskeleton at the plasma membrane. May promote neurite outgrowth.
TRIM27	TRI27_HUMAN	8	CHD4|EIF3E|MBD4|PIAS1|PIAS2|PIAS3|PIAS4|PRAM1	0.65	Has a transcriptional repressor activity by cooperating with EPC1. Induces apoptosis by activating Jun N-terminal kinase and p38 kinase and also increases caspase-3-like activity independently of mitochondrial events. May function in male germ cell development. Has DNA-binding activity and preferentially bound to double-stranded DNA (By similarity). E3 ubiquitin-protein ligase that mediates ubiqu…
MCM2	MCM2_HUMAN	7	AKAP8|CDC7|MCM4|MCM5|MCM6|MCM7|ORC2L	0.648	Acts as component of the MCM2-7 complex (MCM complex) which is the putative replicative helicase essential for 'once per cell cycle' DNA replication initiation and elongation in eukaryotic cells. The active ATPase sites in the MCM2-7 ring are formed through the interaction surfaces of two neighboring subunits such that a critical structure of a conserved arginine finger motif is provided in trans…
XPO1	XPO1_HUMAN	11	APC|CDCA4|CDKN1B|CIITA|CRK|NMD3|NUP62|RAN|RANBP3|SERTAD2|SMARCB1	0.646	Mediates the nuclear export of cellular proteins (cargos) bearing a leucine-rich nuclear export signal (NES) and of RNAs. In the nucleus, in association with RANBP3, binds cooperatively to the NES on its target protein and to the GTPase RAN in its active GTP-bound form (Ran-GTP). Docking of this complex to the nuclear pore complex (NPC) is mediated through binding to nucleoporins. Upon transit of…
FANCC	FANCC_HUMAN	12	CDK1|DNAJB1|FANCA|FANCE|GSTP1|HSP90B1|HSPA1A|HSPA4|HSPA8|POR|STAT1|ZBTB32	0.646	DNA repair protein that may operate in a postreplication repair or a cell cycle checkpoint function. May be implicated in interstrand DNA cross-link repair and in the maintenance of normal chromosome stability. Upon IFNG induction, may facilitate STAT1 activation by recruiting STAT1 to IFNGR1.
HSPA8	HSP7C_HUMAN	11	BAG1|BAG2|BAG3|CFTR|DNAJB1|FANCC|HDAC10|IL16|PARK2|STUB1|UBC	0.646	Acts as a repressor of transcriptional activation. Inhibits the transcriptional coactivator activity of CITED1 on Smad-mediated transcription. Chaperone. Component of the PRP19- CDC5L complex that forms an integral part of the spliceosome and is required for activating pre-mRNA splicing. May have a scaffolding role in the spliceosome assembly as it contacts all other components of the core comple…
CFTR	CFTR_HUMAN	10	DNAJC5|GOPC|HSPA8|PDZK1|PRKAA1|SLC9A3R1|SLC9A3R2|SNAP23|STX1A|UBC	0.646	Involved in the transport of chloride ions. May regulate bicarbonate secretion and salvage in epithelial cells by regulating the SLC4A7 transporter.
RPS6KA1	KS6A1_HUMAN	5	MAPK1|NFKBIA|TOB1|TSC2|YWHAB	0.646	Serine/threonine-protein kinase that acts downstream of ERK (MAPK1/ERK2 and MAPK3/ERK1) signaling and mediates mitogenic and stress-induced activation of the transcription factors CREB1, ETV1/ER81 and NR4A1/NUR77, regulates translation through RPS6 and EIF4B phosphorylation, and mediates cellular proliferation, survival, and differentiation by modulating mTOR signaling and repressing pro-apoptoti…
ZAP70	ZAP70_HUMAN	5	CD3E|DBNL|SH3BP2|SHB|SHC1	0.644	Tyrosine kinase that plays an essential role in regulation of the adaptive immune response. Regulates motility, adhesion and cytokine expression of mature T-cells, as well as thymocyte development. Contributes also to the development and activation of primary B-lymphocytes. When antigen presenting cells (APC) activate T-cell receptor (TCR), a serie of phosphorylations lead to the recruitment of Z…
TRIM21	RO52_HUMAN	7	CUL1|FADD|FBXW11|IRF3|IRF8|SKP2|USP4	0.642	E3 ubiquitin-protein ligase whose activity is dependent on E2 enzymes, UBE2D1, UBE2D2, UBE2E1 and UBE2E2. Forms a ubiquitin ligase complex in cooperation with the E2 UBE2D2 that is used not only for the ubiquitination of USP4 and IKBKB but also for its self-ubiquitination. Component of cullin-RING-based SCF (SKP1-CUL1-F-box protein) E3 ubiquitin-protein ligase complexes such as SCF(SKP2)-like com…
USP7	UBP7_HUMAN	14	ATXN1|BMI1|CBX8|CLSPN|DAXX|DNMT1|FOXN2|MDM2|MDM4|PCGF2|RING1|RNF2|TP53|UHRF1	0.642	Hydrolase that deubiquitinates target proteins such as FOXO4, p53/TP53, MDM2, ERCC6, PTEN and DAXX. Together with DAXX, prevents MDM2 self-ubiquitination and enhances the E3 ligase activity of MDM2 towards p53/TP53, thereby promoting p53/TP53 ubiquitination and proteasomal degradation. Deubiquitinates p53/TP53 and MDM2 and strongly stabilizes p53/TP53 even in the presence of excess MDM2, and also…
EED	EED_HUMAN	8	EZH1|EZH2|GAG|HDAC2|ITGB7|PPP1R8|SUZ12|TGS1	0.64	Polycomb group (PcG) protein. Component of the PRC2/EED- EZH2 complex, which methylates 'Lys-9' and 'Lys-27' of histone H3, leading to transcriptional repression of the affected target gene. The PRC2/EED-EZH2 complex may also serve as a recruiting platform for DNA methyltransferases, thereby linking two epigenetic repression systems. Genes repressed by the PRC2/EED-EZH2 complex include HOXC8, HOX…
EHMT2	EHMT2_HUMAN	6	BAT2L1|CDYL|HIST1H3A|MED12|RERE|RUVBL2	0.64	Histone methyltransferase that specifically mono- and dimethylates 'Lys-9' of histone H3 (H3K9me1 and H3K9me2, respectively) in euchromatin. H3K9me represents a specific tag for epigenetic transcriptional repression by recruiting HP1 proteins to methylated histones. Also mediates monomethylation of 'Lys-56' of histone H3 (H3K56me1) in G1 phase, leading to promote interaction between histone H3 an…
TRAF1	TRAF1_HUMAN	8	BIRC2|CASP8|HIVEP3|TNFAIP3|TNFRSF11A|TNFRSF8|TNFSF9|TRAIP	0.64	Adapter molecule that regulates the activation of NF- kappa-B and JNK. Plays a role in the regulation of cell survival and apoptosis. The heterotrimer formed by TRAF1 and TRAF2 is part of a E3 ubiquitin-protein ligase complex that promotes ubiquitination of target proteins, such as MAP3K14. The TRAF1/TRAF2 complex recruits the antiapoptotic E3 protein- ubiquitin ligases BIRC2 and BIRC3 to TNFRSF1…
RBL2	RBL2_HUMAN	6	BRF1|CDK2|EZH2|PHB|RAF1|RBBP8	0.64	Key regulator of entry into cell division. Directly involved in heterochromatin formation by maintaining overall chromatin structure and, in particular, that of constitutive heterochromatin by stabilizing histone methylation. Recruits and targets histone methyltransferases SUV420H1 and SUV420H2, leading to epigenetic transcriptional repression. Controls histone H4 'Lys-20' trimethylation. Probabl…
ACTN2	ACTN2_HUMAN	5	ACTN3|ADAM12|DISC1|KCNA5|MYOZ1	0.64	F-actin cross-linking protein which is thought to anchor actin to a variety of intracellular structures. This is a bundling protein.
PARP1	PARP1_HUMAN	34	APTX|CDK8|CDKN1A|EP300|FOXO1|GTF2F1|H2AFX|H2AFY|H3F3A|HDAC1|HDAC2|HDAC3|HIST1H1C|HSPA2|KLF8|MED14|MED6|MYBL2|NCAPD2|NFATC1|PARP2|PARP3|PCNA|PIAS4|POLA1|POLA2|POLB|RELA|SP1|TP53|XRCC1|XRCC5|XRCC6|ZNF423	0.64	Involved in the base excision repair (BER) pathway, by catalyzing the poly(ADP-ribosyl)ation of a limited number of acceptor proteins involved in chromatin architecture and in DNA metabolism. This modification follows DNA damages and appears as an obligatory step in a detection/signaling pathway leading to the reparation of DNA strand breaks. Mediates the poly(ADP- ribosyl)ation of APLF and CHFR.…
PRKCI	KPCI_HUMAN	9	ADAP1|CHUK|FRS2|GAPDH|IKBKB|PARD3|PDPK1|SMG1|SQSTM1	0.638	Calcium- and diacylglycerol-independent serine/ threonine-protein kinase that plays a general protective role against apoptotic stimuli, is involved in NF-kappa-B activation, cell survival, differentiation and polarity, and contributes to the regulation of microtubule dynamics in the early secretory pathway. Is necessary for BCR-ABL oncogene-mediated resistance to apoptotic drug in leukemia cells…
RAB4A	RAB4A_HUMAN	5	CD2AP|KIF3B|RAB11FIP1|RABEP1|STX4	0.638	Protein transport. Probably involved in vesicular traffic (By similarity).
PPP5C	PPP5_HUMAN	5	CDC27|CPNE1|CRY2|GNA12|MAP3K5	0.636	May play a role in the regulation of RNA biogenesis and/or mitosis. In vitro, dephosphorylates serine residues of skeletal muscle phosphorylase and histone H1.
HIST3H3	H31T_HUMAN	6	ASF1A|ASH2L|MDM2|MLL|RAG1|WDR5	0.636	Core component of nucleosome. Nucleosomes wrap and compact DNA into chromatin, limiting DNA accessibility to the cellular machineries which require DNA as a template. Histones thereby play a central role in transcription regulation, DNA repair, DNA replication and chromosomal stability. DNA accessibility is regulated via a complex set of post-translational modifications of histones, also called h…
PIK3R2	P85B_HUMAN	6	CRKL|CSF1|EGF|ERBB2|FYN|PIK3CD	0.636	Binds to activated (phosphorylated) protein-tyrosine kinases, through its SH2 domain, and acts as an adapter, mediating the association of the p110 catalytic unit to the plasma membrane.
PTK2B	FAK2_HUMAN	19	ASAP2|DLG3|DLG4|EWSR1|FYN|GSN|MBD2|NPHP1|PITPNM1|PITPNM2|PITPNM3|PTPN11|PTPN6|PXN|RASA1|RB1CC1|SORBS2|SRC|TGFB1I1	0.634	Non-receptor protein-tyrosine kinase that regulates reorganization of the actin cytoskeleton, cell polarization, cell migration, adhesion, spreading and bone remodeling. Plays a role in the regulation of the humoral immune response, and is required for normal levels of marginal B-cells in the spleen and normal migration of splenic B-cells. Required for normal macrophage polarization and migration…
TRAF3	TRAF3_HUMAN	7	CD40|LTBR|NUP62|TANK|TNFRSF11A|TNFRSF8|TRAF3IP1	0.634	Regulates pathways leading to the activation of NF- kappa-B and MAP kinases, and plays a central role in the regulation of B-cell survival. Part of signaling pathways leading to the production of cytokines and interferon. Required for normal antibody isotype switching from IgM to IgG. Plays a role T-cell dependent immune responses. Plays a role in the regulation of antiviral responses. Is an esse…
CIITA	C2TA_HUMAN	6	HDAC2|MAPK1|NCOA1|RFX5|RFXANK|XPO1	0.634	Essential for transcriptional activity of the HLA class II promoter; activation is via the proximal promoter. No DNA binding of in vitro translated CIITA was detected. May act in a coactivator-like fashion through protein-protein interactions by contacting factors binding to the proximal MHC class II promoter, to elements of the transcription machinery, or both. Alternatively it may activate HLA …
CUL1	CUL1_HUMAN	13	CAND1|COMMD1|DCUN1D1|E2F1|FBXO18|PARK2|PSMA6|RBX1|RNF7|SKP1|SKP2|TRIM21|ZC3HC1	0.634	Core component of multiple cullin-RING-based SCF (SKP1- CUL1-F-box protein) E3 ubiquitin-protein ligase complexes, which mediate the ubiquitination of proteins involved in cell cycle progression, signal transduction and transcription. In the SCF complex, serves as a rigid scaffold that organizes the SKP1-F-box protein and RBX1 subunits. May contribute to catalysis through positioning of the subst…
CDK9	CDK9_HUMAN	18	AR|CCNK|CCNT1|CCNT2|CDC34|DHX30|EP300|GATA4|MDFIC|MYBL2|MYC|NR2E3|POLR2A|RB1|RELA|SKP1|STAT3|SUPT5H	0.632	Protein kinase involved in the regulation of transcription. Member of the cyclin-dependent kinase pair (CDK9/cyclin-T) complex, also called positive transcription elongation factor b (P-TEFb), which facilitates the transition from abortive to productive elongation by phosphorylating the CTD (C-terminal domain) of the large subunit of RNA polymerase II (RNAP II) POLR2A, SUPT5H and RDBP. This compl…
CIB1	CIB1_HUMAN	6	ITGB3|PAX3|PRKDC|PSEN2|RAC3|UBR5	0.63	May convert the inactive conformation of integrin alpha- IIb/beta3 to an active form through binding to the integrin cytoplasmic domain. Induces cell migration and spreading mediated through integrin (possibly via focal adhesion complexes). Functions as a negative regulator of stress activated MAP kinase (MAPK) signaling pathways. May play a role in regulation of apoptosis. Interacts with and up-…
TNFRSF1A	TNR1A_HUMAN	11	BAG4|IKBKB|JAK1|JAK2|NSMAF|PIP4K2B|PSMD2|SUMO1|TRADD|TRPC4AP|UBE2I	0.63	Receptor for TNFSF2/TNF-alpha and homotrimeric TNFSF1/lymphotoxin-alpha. The adapter molecule FADD recruits caspase-8 to the activated receptor. The resulting death-inducing signaling complex (DISC) performs caspase-8 proteolytic activation which initiates the subsequent cascade of caspases (aspartate- specific cysteine proteases) mediating apoptosis. Contributes to the induction of non-cytocidal…
ITK	ITK_HUMAN	6	KHDRBS1|KPNA2|LAT|LCP2|PLCG1|PPIA	0.63	Tyrosine kinase that plays an essential role in regulation of the adaptive immune response. Regulates the development, function and differentiation of conventional T-cells and nonconventional NKT-cells. When antigen presenting cells (APC) activate T-cell receptor (TCR), a series of phosphorylation lead to the recruitment of ITK to the cell membrane, in the vicinity of the stimulated TCR receptor,…
SMURF2	SMUF2_HUMAN	8	AIMP1|ID1|ID3|RNF11|SMAD1|SMAD2|SMAD3|UBC	0.63	E3 ubiquitin-protein ligase which accepts ubiquitin from an E2 ubiquitin-conjugating enzyme in the form of a thioester and then directly transfers the ubiquitin to targeted substrates. Interacts with SMAD1 and SMAD7 in order to trigger their ubiquitination and proteasome-dependent degradation. In addition, interaction with SMAD7 activates autocatalytic degradation, which is prevented by interacti…
AXIN1	AXIN1_HUMAN	7	APC|CTNNB1|DAXX|DVL1|DVL3|GSK3B|PPP2R5A	0.628	Component of the beta-catenin destruction complex required for regulating CTNNB1 levels through phosphorylation and ubiquitination, and modulating Wnt-signaling. Controls dorsoventral patterning via two opposing effects; down-regulates CTNNB1 to inhibit the Wnt signaling pathway and ventralize embryos, but also dorsalizes embryos by activating a Wnt- independent JNK signaling pathway. In Wnt sign…
CSF3R	CSF3R_HUMAN	6	FZR1|GRB2|HCK|SHC1|WSB1|WSB2	0.628	Receptor for granulocyte colony-stimulating factor (CSF3), essential for granulocytic maturation. Plays a crucial role in the proliferation, differientation and survival of cells along the neutrophilic lineage. In addition it may function in some adhesion or recognition events at the cell surface.
SYK	KSYK_HUMAN	12	CBL|CRKL|FCGR2A|FYN|HDAC1|HDAC3|HDAC6|HDAC9|LCK|LYN|PTPN6|VAV1	0.628	Non-receptor tyrosine kinase which mediates signal transduction downstream of a variety of transmembrane receptors including classical immunoreceptors like the B-cell receptor (BCR). Regulates several biological processes including innate and adaptive immunity, cell adhesion, osteoclast maturation, platelet activation and vascular development. Assembles into signaling complexes with activated rec…
GAPDH	G3P_HUMAN	8	AR|ATXN1|CCNB1|CDKN1A|PLD2|POU2F1|PRKCI|SET	0.628	Has both glyceraldehyde-3-phosphate dehydrogenase and nitrosylase activities, thereby playing a role in glycolysis and nuclear functions, respectively. Participates in nuclear events including transcription, RNA transport, DNA replication and apoptosis. Nuclear functions are probably due to the nitrosylase activity that mediates cysteine S-nitrosylation of nuclear target proteins such as SIRT1, H…
H2AFX	H2AX_HUMAN	20	ATM|BRCA1|BRCA2|CALM1|DHX9|KAT5|MAPK8|MDC1|NBN|PARP1|PBK|PPM1D|PRKDC|SMARCA4|SSRP1|STK4|SUPT16H|TP53BP1|WRN|XRCC6	0.628	Variant histone H2A which replaces conventional H2A in a subset of nucleosomes. Nucleosomes wrap and compact DNA into chromatin, limiting DNA accessibility to the cellular machineries which require DNA as a template. Histones thereby play a central role in transcription regulation, DNA repair, DNA replication and chromosomal stability. DNA accessibility is regulated via a complex set of post-tran…
MSN	MOES_HUMAN	6	EZR|ICAM3|NCF1|NCF4|SPN|VCAM1	0.626	Probably involved in connections of major cytoskeletal structures to the plasma membrane. May inhibit herpes simplex virus 1 infection at an early stage.
DCUN1D1	DCNL1_HUMAN	5	CAND1|CUL1|CUL2|CUL3|RBX1	0.626	Part of an E3 ubiquitin ligase complex for neddylation. Required for neddylation of cullin components of E3 cullin-RING ubiquitin ligase complexes by enhancing the rate of cullins neddylation. Functions to recruit the NEDD8-charged E2 enzyme to the cullin component. Involved in the release of inhibitory effets of CAND1 on cullin-RING ligase E3 complex assembly and activity. Acts also as an oncoge…
SETD7	SETD7_HUMAN	6	DNMT1|ESR1|L3MBTL|RELA|SIRT1|TAF10	0.626	Histone methyltransferase that specifically monomethylates 'Lys-4' of histone H3. H3 'Lys-4' methylation represents a specific tag for epigenetic transcriptional activation. Plays a central role in the transcriptional activation of genes such as collagenase or insulin. Recruited by IPF1/PDX-1 to the insulin promoter, leading to activate transcription. Has also methyltransferase activity toward no…
DLG4	DLG4_HUMAN	32	ADRB1|AKAP5|CASK|CRIPT|DLG3|DLGAP1|DLGAP2|DYNLL1|DYNLL2|ERBB2|ERBB4|EXOC4|FZD7|GRIK1|GRIK2|GRIK5|GRIN2A|GRIN2B|GRIN2C|HGS|KCNA1|KCNA2|KCNA4|KCNA5|KCNJ2|KCNJ4|LRP1|LRP2|NLGN1|NOS1|PTK2B|SEMA4C	0.624	Interacts with the cytoplasmic tail of NMDA receptor subunits and shaker-type potassium channels. Required for synaptic plasticity associated with NMDA receptor signaling. Overexpression or depletion of DLG4 changes the ratio of excitatory to inhibitory synapses in hippocampal neurons. May reduce the amplitude of ASIC3 acid-evoked currents by retaining the channel intracellularly. May regulate th…
DDX20	DDX20_HUMAN	12	EIF2C2|GEMIN4|LSM2|SIP1|SMN1|SNRPB|SNRPD1|SNRPD2|SNRPD3|SNRPE|SNRPF|SNRPG	0.624	The SMN complex plays an essential role in spliceosomal snRNP assembly in the cytoplasm and is required for pre-mRNA splicing in the nucleus. It may also play a role in the metabolism of snoRNPs.
KAT2B	KAT2B_HUMAN	38	ATXN3|BRCA2|CCNA2|CDCA4|CEBPB|CNTN2|CREBBP|CTBP1|CTNNB1|EP300|ESRRA|ETV1|HDAC3|HNF1A|HSD11B2|IRF2|KLF13|KLF15|MDM2|MECOM|MYC|MYOD1|NCOA1|NFE4|NOTCH1|RB1|RBPJ|RPS6KB1|RPS6KB2|SATB1|SERTAD1|SERTAD2|SIRT1|SMAD2|SMAD3|TCF3|TP53|TWIST1	0.624	Functions as a histone acetyltransferase (HAT) to promote transcriptional activation. Has significant histone acetyltransferase activity with core histones (H3 and H4), and also with nucleosome core particles. Inhibits cell-cycle progression and counteracts the mitogenic activity of the adenoviral oncoprotein E1A. In case of HIV-1 infection, it is recruited by the viral protein Tat. Regulates Tat…
PAFAH1B1	LIS1_HUMAN	8	CLIP1|DCX|DYNC1H1|NDE1|NDEL1|NUDC|PAFAH1B2|PAFAH1B3	0.622	Required for proper activation of Rho GTPases and actin polymerization at the leading edge of locomoting cerebellar neurons and postmigratory hippocampal neurons in response to calcium influx triggered via NMDA receptors. Non-catalytic subunit of an acetylhydrolase complex which inactivates platelet- activating factor (PAF) by removing the acetyl group at the SN-2 position (By similarity). Positi…
MAPK14	MK14_HUMAN	21	AKT1|ATF2|CDC25B|CDC25C|CSNK2A1|DUSP1|DUSP10|DUSP16|DUSP4|FUBP1|GADD45A|HTRA2|KRT8|MAP2K3|MAP2K6|MAPKAPK3|MKNK1|RPS6KA4|RPS6KA5|TAB1|ZFP36L1	0.622	Serine/threonine kinase which acts as an essential component of the MAP kinase signal transduction pathway. MAPK14 is one of the four p38 MAPKs which play an important role in the cascades of cellular responses evoked by extracellular stimuli such as proinflammatory cytokines or physical stress leading to direct activation of transcription factors. Accordingly, p38 MAPKs phosphorylate a broad ran…
FANCF	FANCF_HUMAN	6	FANCA|FANCE|FANCG|FANCM|GINS2|HES1	0.622	DNA repair protein that may operate in a postreplication repair or a cell cycle checkpoint function. May be implicated in interstrand DNA cross-link repair and in the maintenance of normal chromosome stability (By similarity).
CD4	CD4_HUMAN	5	ENV|NEF|SPG21|UNC119|VPU	0.618	Accessory protein for MHC class-II antigen/T-cell receptor interaction. May regulate T-cell activation. Induces the aggregation of lipid rafts.
TEC	TEC_HUMAN	5	DOK1|JAK2|KIT|PRLR|SOCS1	0.618	Non-receptor tyrosine kinase that contributes to signaling from many receptors and participates as a signal transducer in multiple downstream pathways, including regulation of the actin cytoskekleton. Plays a redundant role to ITK in regulation of the adaptive immune response. Regulates the development, function and differentiation of conventional T-cells and nonconventional NKT-cells. Required f…
CHUK	IKKA_HUMAN	19	AKT1|AKT2|CTNNB1|CUEDC2|FANCA|HIST2H3C|IKBKB|IKBKG|MAP3K14|MAP3K8|NCOA3|NFKBIA|PEBP1|PRKCA|PRKCD|PRKCI|PRKDC|TP73|TRAF2	0.618	Serine kinase that plays an essential role in the NF- kappa-B signaling pathway which is activated by multiple stimuli such as inflammatory cytokines, bacterial or viral products, DNA damages or other cellular stresses. Acts as part of the canonical IKK complex in the conventional pathway of NF-kappa-B activation and phosphorylates inhibitors of NF-kappa-B on serine residues. These modifications …
AKAP1	AKAP1_HUMAN	6	C3ORF15|MYCBP|PRKAR1A|PRKAR1B|PRKAR2A|SIAH2	0.616	Binds to type I and II regulatory subunits of protein kinase A and anchors them to the cytoplasmic face of the mitochondrial outer membrane.
NGFR	TNR16_HUMAN	9	CBL|FSCN1|NDN|NDNL2|NGFRAP1|PRKACB|TCF19|TRAF2|TRAF4	0.616	Low affinity receptor which can bind to NGF, BDNF, NT-3, and NT-4. Can mediate cell survival as well as cell death of neural cells.
MYD88	MYD88_HUMAN	6	CISH|IRAK4|IRF7|RAC1|TIRAP|TLR4	0.614	Adapter protein involved in the Toll-like receptor and IL-1 receptor signaling pathway in the innate immune response. Acts via IRAK1, IRAK2, IRF7 and TRAF6, leading to NF-kappa-B activation, cytokine secretion and the inflammatory response. Increases IL-8 transcription. Involved in IL-18-mediated signaling pathway. Activates IRF1 resulting in its rapid migration into the nucleus to mediate an eff…
STUB1	CHIP_HUMAN	25	ATXN1|ATXN3|BAG1|DAXX|DNAJB1|ERBB2|ESR1|FBXO2|GUCY1A2|HSP90AA1|HSPA1A|HSPA4|HSPA8|IRF1|MAPT|MST1R|NOS1|NQO1|PARK2|RAF1|RUNX1|RUNX2|SMAD1|TP53|UBC	0.614	E3 ubiquitin-protein ligase which targets misfolded chaperone substrates towards proteasomal degradation. Collaborates with ATXN3 in the degradation of misfolded chaperone substrates: ATXN3 restricting the length of ubiquitin chain attached to STUB1/CHIP substrates and preventing further chain extension. Ubiquitinates NOS1 in concert with Hsp70 and Hsp40. Modulates the activity of several chapero…
ADAM15	ADA15_HUMAN	5	GRB2|HCK|LCK|SH3GL2|SNX9	0.614	Active metalloproteinase with gelatinolytic and collagenolytic activity. Plays a role in the wound healing process. Mediates both heterotypic intraepithelial cell/T-cell interactions and homotypic T-cell aggregation. Inhibits beta-1 integrin-mediated cell adhesion and migration of airway smooth muscle cells. Suppresses cell motility on or towards fibronectin possibly by driving alpha-v/beta-1 int…
HUS1	HUS1_HUMAN	5	HDAC1|PCNA|RAD1|RAD17|RAD9A	0.612	Component of the 9-1-1 cell-cycle checkpoint response complex that plays a major role in DNA repair. The 9-1-1 complex is recruited to DNA lesion upon damage by the RAD17-replication factor C (RFC) clamp loader complex. Acts then as a sliding clamp platform on DNA for several proteins involved in long-patch base excision repair (LP-BER). The 9-1-1 complex stimulates DNA polymerase beta (POLB) act…
USP11	UBP11_HUMAN	6	BMI1|BRCA2|CBX8|PCGF2|RANBP9|RNF2	0.612	Protease that can remove conjugated ubiquitin from target proteins and polyubiquitin chains. Inhibits the degradation of target proteins by the proteasome. Plays a role in the regulation of pathways leading to NF-kappa-B activation. Plays a role in the regulation of DNA repair after double-stranded DNA breaks.
ORC1L	-	6	CDC6|CDK2|MYST2|ORC2L|SKP2|TERF2	0.61	-
BMPR2	BMPR2_HUMAN	5	ACVR1|BMP2|FHL2|LIMK1|TGFBR1	0.61	On ligand binding, forms a receptor complex consisting of two type II and two type I transmembrane serine/threonine kinases. Type II receptors phosphorylate and activate type I receptors which autophosphorylate, then bind and activate SMAD transcriptional regulators. Binds to BMP-7, BMP-2 and, less efficiently, BMP-4. Binding is weak but enhanced by the presence of type I receptors for BMPs.
XRCC5	XRCC5_HUMAN	10	BAZ1A|BRCA1|CHAF1A|NR1H4|PARP1|PDX1|PRKDC|TERT|WRN|XRCC6	0.61	Single stranded DNA-dependent ATP-dependent helicase. Has a role in chromosome translocation. The DNA helicase II complex binds preferentially to fork-like ends of double-stranded DNA in a cell cycle-dependent manner. It works in the 3'-5' direction. Binding to DNA may be mediated by XRCC6. Involved in DNA non-homologous end joining (NHEJ) required for double-strand break repair and V(D)J recombi…
NF2	MERL_HUMAN	10	AKT1|EZR|HGS|MED28|SCHIP1|SDCBP|SGSM3|SPTBN1|UBC|VPRBP	0.61	Probable regulator of the Hippo/SWH (Sav/Wts/Hpo) signaling pathway, a signaling pathway that plays a pivotal role in tumor suppression by restricting proliferation and promoting apoptosis. Along with WWC1 can synergistically induce the phosphorylation of LATS1 and LATS2 and can probably function in the regulation of the Hippo/SWH (Sav/Wts/Hpo) signaling pathway. May act as a membrane stabilizing…
BCL3	BCL3_HUMAN	10	BARD1|COPS5|EP300|FOS|JUN|KAT5|N4BP2|NFKB1|PIR|RXRA	0.606	Contributes to the regulation of transcriptional activation of NF-kappa-B target genes. In the cytoplasm, inhibits the nuclear translocation of the NF-kappa-B p50 subunit. In the nucleus, acts as transcriptional activator that promotes transcription of NF-kappa-B target genes. Contributes to the regulation of cell proliferation (By similarity).
UBE3A	UBE3A_HUMAN	18	ANXA1|BPY2|CDKN1B|HCVGP1|LCK|MCM7|NDUFA13|PGR|RAD23A|RAD23B|RNF2|TH1L|TP53|TSC2|UBE2D2|UBE2L3|UBQLN1|UBQLN2	0.606	E3 ubiquitin-protein ligase which accepts ubiquitin from an E2 ubiquitin-conjugating enzyme in the form of a thioester and transfers it to its substrates. Several substrates have been identified including the RAD23A and RAD23B, MCM7 (which is involved in DNA replication), annexin A1, the PML tumor suppressor, and the cell cycle regulator CDKN1B. Additionally, may function as a cellular quality co…
HRAS	RASH_HUMAN	15	BRAF|IKZF3|MLLT4|PIK3CA|PIK3R1|RAF1|RALGDS|RAP1GDS1|RASA1|RASIP1|RASSF1|RGL2|RGL4|RIN1|SHOC2	0.606	Ras proteins bind GDP/GTP and possess intrinsic GTPase activity.
RPA1	RFA1_HUMAN	10	ATR|BLM|BRCA2|BRIP1|HNRNPUL1|MUTYH|RFWD3|RPA4|TP53|XPA	0.604	Plays an essential role in several cellular processes in DNA metabolism including replication, recombination and DNA repair. Binds and subsequently stabilizes single-stranded DNA intermediates and thus prevents complementary DNA from reannealing.
MAD2L1	MD2L1_HUMAN	6	ADAM17|CDC20|CSF2RB|ESR2|MAD1L1|UBD	0.604	Component of the spindle-assembly checkpoint that prevents the onset of anaphase until all chromosomes are properly aligned at the metaphase plate. Required for the execution of the mitotic checkpoint which monitors the process of kinetochore- spindle attachment and inhibits the activity of the anaphase promoting complex by sequestering CDC20 until all chromosomes are aligned at the metaphase pla…
MAP4K1	M4K1_HUMAN	8	BLNK|CRK|CRKL|DBNL|GRAP2|GRB2|NCK1|PPP4C	0.604	May play a role in the response to environmental stress. Appears to act upstream of the JUN N-terminal pathway. May play a role in hematopoietic lineage decisions and growth regulation.
ERCC3	ERCC3_HUMAN	5	BCR|ERCC2|PSMC5|TP53|XPC	0.604	ATP-dependent 3'-5' DNA helicase, component of the core- TFIIH basal transcription factor, involved in nucleotide excision repair (NER) of DNA and, when complexed to CAK, in RNA transcription by RNA polymerase II. Acts by opening DNA either around the RNA transcription start site or the DNA damage.
CLU	CLUS_HUMAN	5	COMMD1|LEP|TGFBR1|TGFBR2|XRCC6	0.602	Isoform 1 functions as extracellular chaperone that prevents aggregation of nonnative proteins. Prevents stress- induced aggregation of blood plasma proteins. Inhibits formation of amyloid fibrils by APP, APOC2, B2M, CALCA, CSN3, SNCA and aggregation-prone LYZ variants (in vitro). Does not require ATP. Maintains partially unfolded proteins in a state appropriate for subsequent refolding by other …
RHEB	RHEB_HUMAN	6	ATM|ATR|MTOR|RAF1|RPTOR|TSC2	0.602	Stimulates the phosphorylation of S6K1 and EIF4EBP1 through activation of mTORC1 signaling. Activates the protein kinase activity of mTORC1. Has low intrinsic GTPase activity.
TLE1	TLE1_HUMAN	13	FOXA2|FOXG1|HDAC1|HES1|HES6|IL6ST|RUNX1|RUNX3|SIRT1|SIX3|SIX6|TLE2|UTY	0.6	Transcriptional corepressor that binds to a number of transcription factors. Inhibits NF-kappa-B-regulated gene expression. Inhibits the transcriptional activation mediated by FOXA2, and by CTNNB1 and TCF family members in Wnt signaling. The effects of full-length TLE family members may be modulated by association with dominant-negative AES. Unusual function as coactivator for ESRRG.
CCNG1	CCNG1_HUMAN	5	CDKN2A|GAK|MDM2|PPP2R4|TP53	0.6	May play a role in growth regulation. Is associated with G2/M phase arrest in response to DNA damage. May be an intermediate by which p53 mediates its role as an inhibitor of cellular proliferation (By similarity).
SKI	SKI_HUMAN	15	GLI2|GLI3|HIPK2|MECP2|MYB|NCOR1|PML|SIN3A|SKIL|SMAD1|SMAD2|SMAD3|SMAD4|SNW1|SPI1	0.6	May play a role in terminal differentiation of skeletal muscle cells but not in the determination of cells to the myogenic lineage. Functions as a repressor of TGF-beta signaling.
MLH1	MLH1_HUMAN	7	BLM|EXO1|MBD4|MSH4|MYC|PMS1|PMS2	0.6	Heterodimerizes with PMS2 to form MutL alpha, a component of the post-replicative DNA mismatch repair system (MMR). DNA repair is initiated by MutS alpha (MSH2-MSH6) or MutS beta (MSH2-MSH6) binding to a dsDNA mismatch, then MutL alpha is recruited to the heteroduplex. Assembly of the MutL-MutS- heteroduplex ternary complex in presence of RFC and PCNA is sufficient to activate endonuclease activi…
XIAP	XIAP_HUMAN	13	AKT1|BIRC5|CASP3|CASP9|DIABLO|HTRA2|MAGED1|MAP3K2|STRADB|TAB1|UBE2D1|UBE2D3|XAF1	0.598	Multi-functional protein which regulates not only caspases and apoptosis, but also modulates inflammatory signaling and immunity, copper homeostasis, mitogenic kinase signaling, cell proliferation, as well as cell invasion and metastasis. Acts as a direct caspase inhibitor. Directly bind to the active site pocket of CASP3 and CASP7 and obstructs substrate entry. Inactivates CASP9 by keeping it in…
RCHY1	ZN363_HUMAN	6	AR|CDKN1B|COPE|KRIT1|TP53|UBC	0.596	Mediates E3-dependent ubiquitination and proteasomal degradation of target proteins, including p53/TP53, P73, HDAC1 and CDKN1B. Preferentially acts on tetrameric p53/TP53. Monoubiquitinates the translesion DNA polymerase POLH. Contributes to the regulation of the cell cycle progression. Increases AR transcription factor activity.
BUB1B	BUB1B_HUMAN	5	AP2B1|BRCA2|BUB3|CDC20|SNCG	0.596	Essential component of the mitotic checkpoint. Required for normal mitosis progression. The mitotic checkpoint delays anaphase until all chromosomes are properly attached to the mitotic spindle. One of its checkpoint functions is to inhibit the activity of the anaphase-promoting complex/cyclosome (APC/C) by blocking the binding of CDC20 to APC/C, independently of its kinase activity. The other is…
PFN1	PROF1_HUMAN	5	FMNL1|MLLT4|VASP|WASF1|WASL	0.596	Binds to actin and affects the structure of the cytoskeleton. At high concentrations, profilin prevents the polymerization of actin, whereas it enhances it at low concentrations. By binding to PIP2, it inhibits the formation of IP3 and DG. Inhibits androgen receptor (AR) and HTT aggregation and binding of G-actin is essential for its inhibition of AR.
SREBF1	SRBP1_HUMAN	10	AR|CREBBP|EP300|FBXW7|LMNA|MED15|MED23|MED7|NR0B1|TWIST2	0.596	Transcriptional activator required for lipid homeostasis. Regulates transcription of the LDL receptor gene as well as the fatty acid and to a lesser degree the cholesterol synthesis pathway (By similarity). Binds to the sterol regulatory element 1 (SRE-1) (5'-ATCACCCCAC-3'). Has dual sequence specificity binding to both an E-box motif (5'-ATCACGTGA-3') and to SRE-1 (5'-ATCACCCCAC-3').
PKN2	PKN2_HUMAN	7	AKT1|HDAC5|MAP3K2|NCK1|PDPK1|PTPN13|RHOA	0.596	PKC-related serine/threonine-protein kinase and Rho/Rac effector protein that participates in specific signal transduction responses in the cell. Plays a role in the regulation of cell cycle progression, actin cytoskeleton assembly, cell migration, cell adhesion, tumor cell invasion and transcription activation signaling processes. Phosphorylates CTTN in hyaluronan-induced astrocytes and hence de…
RFXANK	RFXK_HUMAN	5	CIITA|HDAC4|HDAC5|HDAC9|RFXAP	0.594	Activates transcription from class II MHC promoters. Activation requires the activity of the MHC class II transactivator (MHC2TA). May regulate other genes in the cell. RFX binds the X1 box of MHC-II promoters. Isoform RFX-B-delta5 is not involved in the positive regulation of MHC class II genes.
FANCA	FANCA_HUMAN	13	AKT1|BRCA1|CAPN1|CENPE|CHUK|FANCC|FANCE|FANCF|FANCG|HES1|IKBKB|SMARCA4|SNX5	0.592	DNA repair protein that may operate in a postreplication repair or a cell cycle checkpoint function. May be involved in interstrand DNA cross-link repair and in the maintenance of normal chromosome stability.
TNK2	ACK1_HUMAN	10	AMPH|BIN1|CDC42|CLTA|FABP4|FYN|GRB2|HSH2D|NEDD4|NEDD4L	0.592	Non-receptor tyrosine-protein and serine/threonine- protein kinase that is implicated in cell spreading and migration, cell survival, cell growth and proliferation. Transduces extracellular signals to cytosolic and nuclear effectors. Phosphorylates AKT1, AR, MCF2, WASL and WWOX. Implicated in trafficking and clathrin-mediated endocytosis through binding to epidermal growth factor receptor (EGFR) …
HNRNPK	HNRPK_HUMAN	8	CSK|DDX1|HNRNPL|KHDRBS1|KHDRBS2|PCBP2|PRMT1|PTBP1	0.59	One of the major pre-mRNA-binding proteins. Binds tenaciously to poly(C) sequences. Likely to play a role in the nuclear metabolism of hnRNAs, particularly for pre-mRNAs that contain cytidine-rich sequences. Can also bind poly(C) single- stranded DNA.
HSP90AA1	HS90A_HUMAN	25	AHSA1|AHSA2|AIP|AR|CDC37|DAP3|EPRS|ERN1|ESR1|FKBP5|GNA12|GUCY1B3|HIF1A|HSF1|NOS3|NR3C1|PPARA|PTGES3|RPS3|SP1|STIP1|STK11|STUB1|TGFBR1|TGFBR2	0.59	Molecular chaperone that promotes the maturation, structural maintenance and proper regulation of specific target proteins involved for instance in cell cycle control and signal transduction. Undergoes a functional cycle that is linked to its ATPase activity. This cycle probably induces conformational changes in the client proteins, thereby causing their activation. Interacts dynamically with var…
PRKD1	KPCD1_HUMAN	6	ADAP1|BTK|C1QBP|HSPB1|MT2A|YWHAQ	0.588	Serine/threonine-protein kinase that converts transient diacylglycerol (DAG) signals into prolonged physiological effects downstream of PKC, and is involved in the regulation of MAPK8/JNK1 and Ras signaling, Golgi membrane integrity and trafficking, cell survival through NF-kappa-B activation, cell migration, cell differentiation by mediating HDAC7 nuclear export, cell proliferation via MAPK1/3 (…
RABEP1	RABE1_HUMAN	5	AP1G1|GGA1|GGA2|RAB4A|RAB5A	0.588	Rab effector protein acting as linker between gamma- adaptin, RAB4A and RAB5A. Involved in endocytic membrane fusion and membrane trafficking of recycling endosomes. Stimulates RABGEF1 mediated nucleotide exchange on RAB5A.
FBXW11	FBW1B_HUMAN	9	CDC25A|CDC25B|GLI2|IFNAR1|NFKBIA|PER1|PRLR|SKP1|TRIM21	0.588	Substrate recognition component of a SCF (SKP1-CUL1-F- box protein) E3 ubiquitin-protein ligase complex which mediates the ubiquitination and subsequent proteasomal degradation of target proteins. Probably recognizes and binds to phosphorylated target proteins. SCF(FBXW11) mediates the ubiquitination of CTNNB1 and participates in Wnt signaling. SCF(FBXW11) mediates the ubiquitination of phosphory…
TGFBR2	TGFR2_HUMAN	5	AP2B1|CLU|ENG|HSP90AA1|TGFB3	0.588	Transmembrane serine/threonine kinase forming with the TGF-beta type I serine/threonine kinase receptor, TGFBR1, the non- promiscuous receptor for the TGF-beta cytokines TGFB1, TGFB2 and TGFB3. Transduces the TGFB1, TGFB2 and TGFB3 signal from the cell surface to the cytoplasm and is thus regulating a plethora of physiological and pathological processes including cell cycle arrest in epithelial a…
UBC	UBC_HUMAN	85	AMFR|ANKS1B|APP|ARRB2|ATXN3|BAIAP2L1|BCL2|BECN1|BIRC2|BIRC3|BRCA1|CBL|CCNA2|CDC25C|CDKN1A|CFTR|CHFR|CNTN2|DAXX|DIO2|DLL1|ELF4|EPN1|EPS15|EPS15L1|FOXO1|GGA3|HCVGP1|HERC3|HSPA8|HTT|HUWE1|IKBKG|ITCH|JUN|KCNJ1|MARK4|MDM2|MDM4|NCOA3|NDFIP2|NEDD4|NF2|NFE2L2|NFE4|NFKBIA|NUAK1|OTUB1|PDCD6IP|PJA1|PJA2|POLH|POLI|POLR2A|PRPF8|PSMD4|PTEN|RABGEF1|RCHY1|RELA|RHOA|RIPK1|RNF11|RNF125|RYBP|SCNN1G|SFPQ|SH3KBP1|SMA…	0.588	Ubiquitin exists either covalently attached to another protein, or free (unanchored). When covalently bound, it is conjugated to target proteins via an isopeptide bond either as a monomer (monoubiquitin), a polymer linked via different Lys residues of the ubiquitin (polyubiquitin chains) or a linear polymer linked via the initiator Met of the ubiquitin (linear polyubiquitin chains). Polyubiquitin…
PTPN11	PTN11_HUMAN	19	CD33|CEACAM1|CSF2RB|FRS2|GAB1|GAB2|GRB2|IGF1R|INSR|IRS1|JAK1|JAK2|KIT|PDGFRB|PECAM1|PTK2B|SOCS3|STAT5A|STAT5B	0.584	Acts downstream of various receptor and cytoplasmic protein tyrosine kinases to participate in the signal transduction from the cell surface to the nucleus. Dephosphorylates ROCK2 at Tyr-722 resulting in stimulatation of its RhoA binding activity.
MAP3K5	M3K5_HUMAN	14	CDC25A|GADD45B|GSTM1|HSPA1A|MAP2K6|MAP3K6|MAP3K7|MAPK8IP3|PDCD6|PPP5C|RAF1|SOCS1|TXN|USP9X	0.582	Serine/threonine kinase which acts as an essential component of the MAP kinase signal transduction pathway. Plays an important role in the cascades of cellular responses evoked by changes in the environment. Mediates signaling for determination of cell fate such as differentiation and survival. Plays a crucial role in the apoptosis signal transduction pathway through mitochondria-dependent caspas…
GRIN2B	NMDE2_HUMAN	6	ARHGAP32|DLG2|DLG3|DLG4|LIN7B|MIB2	0.582	NMDA receptor subtype of glutamate-gated ion channels with high calcium permeability and voltage-dependent sensitivity to magnesium. Mediated by glycine. In concert with DAPK1 at extrasynaptic sites, acts as a central mediator for stroke damage. Its phosphorylation at Ser-1303 by DAPK1 enhances synaptic NMDA receptor channel activity inducing injurious Ca2+ influx through them, resulting in an ir…
PRKAR2A	KAP2_HUMAN	12	AKAP1|AKAP11|AKAP13|AKAP14|AKAP2|AKAP3|AKAP8|AKAP9|ARFGEF2|CBFA2T3|RAB32|RUNX1T1	0.58	Regulatory subunit of the cAMP-dependent protein kinases involved in cAMP signaling in cells. Type II regulatory chains mediate membrane association by binding to anchoring proteins, including the MAP2 kinase.
RAB3A	RAB3A_HUMAN	5	CHM|RIMS1|RPH3A|SYTL4|SYTL5	0.58	Involved in exocytosis by regulating a late step in synaptic vesicle fusion. Could play a role in neurotransmitter release by regulating membrane flow in the nerve terminal.
ERC2	ERC2_HUMAN	5	PPFIA1|PPFIA2|PPFIA3|PPFIA4|RIMS1	0.58	Thought to be involved in the organization of the cytomatrix at the nerve terminals active zone (CAZ) which regulates neurotransmitter release. Seems to act together with BSN. May recruit liprin-alpha proteins to the CAZ.
RALGDS	GNDS_HUMAN	8	ARRB2|HRAS|KRAS|MRAS|RAP1A|RAP2A|RAPGEF2|RRAS	0.58	Stimulates the dissociation of GDP from the Ras-related RalA and RalB GTPases which allows GTP binding and activation of the GTPases. Interacts and acts as an effector molecule for R-Ras, H-Ras, K-Ras, and Rap.
LIMK1	LIMK1_HUMAN	6	BMPR2|CDKN1C|NRG1|PAK1|PAK4|YWHAZ	0.58	Serine/threonine-protein kinase that plays an essential role in the regulation of actin filament dynamics. Acts downstream of several Rho family GTPase signal transduction pathways. Activated by upstream kinases including ROCK1, PAK1 and PAK4, which phosphorylate LIMK1 on a threonine residue located in its activation loop. LIMK1 subsequently phosphorylates and inactivates the actin binding/depoly…
FANCG	FANCG_HUMAN	12	BRCA2|CAPN1|CDK1|CYP2E1|ERCC1|FANCA|FANCE|FANCF|HES1|PRDX3|SPTAN1|XRCC3	0.58	DNA repair protein that may operate in a postreplication repair or a cell cycle checkpoint function. May be implicated in interstrand DNA cross-link repair and in the maintenance of normal chromosome stability. Candidate tumor suppressor gene.
IRAK1	IRAK1_HUMAN	5	IKBKG|IRAK1BP1|IRAK4|PELI1|TRAF6	0.578	Serine/threonine-protein kinase that plays a critical role in initiating innate immune response against foreign pathogens. Involved in Toll-like receptor (TLR) and IL-1R signaling pathways. Is rapidly recruited by MYD88 to the receptor- signaling complex upon TLR activation. Association with MYD88 leads to IRAK1 phosphorylation by IRAK4 and subsequent autophosphorylation and kinase activation. Ph…
HDAC3	HDAC3_HUMAN	40	ANKRD11|ATXN3|CEBPD|CREB3|CREBBP|EP300|GATA1|GCM1|GTF2I|HDAC4|HDAC7|HDAC9|HIF1A|IL16|KAT2B|L3MBTL2|LCOR|MAPK11|MEF2D|NCOR1|NCOR2|NR2C1|NRIP1|PARP1|PML|PPARD|PPARG|PPP4C|RUNX2|SRC|SUV39H1|SYK|TAB2|TBL1X|TCP1|THAP7|THRA|THRB|TMPO|YY1	0.578	Responsible for the deacetylation of lysine residues on the N-terminal part of the core histones (H2A, H2B, H3 and H4), and some other non-histone substrates. Histone deacetylation gives a tag for epigenetic repression and plays an important role in transcriptional regulation, cell cycle progression and developmental events. Histone deacetylases act via the formation of large multiprotein complex…
FYN	FYN_HUMAN	33	ADD2|ARHGAP32|BCAR1|CBL|CBLC|CDH1|CSF1R|CTNND1|DAG1|EPHA8|FYB|GNB2L1|GRIN2A|ITCH|JAK2|KHDRBS1|MAPT|NPHS1|NTRK2|PAG1|PIK3R2|PRKCQ|PTK2B|RAF1|SH2D1A|SKAP1|SYK|TNK2|TRPC6|TUBA3C|TYK2|UNC119|WAS	0.578	Non-receptor tyrosine-protein kinase that plays a role in many biological processes including regulation of cell growth and survival, cell adhesion, integrin-mediated signaling, cytoskeletal remodeling, cell motility, immune response and axon guidance. Inactive FYN is phosphorylated on its C-terminal tail within the catalytic domain. Following activation by PKA, the protein subsequently associate…
HIST2H2AC	H2A2C_HUMAN	7	CTCFL|EP300|MYSM1|RNF168|RNF2|TAF1B|UBE2B	0.578	Core component of nucleosome. Nucleosomes wrap and compact DNA into chromatin, limiting DNA accessibility to the cellular machineries which require DNA as a template. Histones thereby play a central role in transcription regulation, DNA repair, DNA replication and chromosomal stability. DNA accessibility is regulated via a complex set of post-translational modifications of histones, also called h…
BIRC3	BIRC3_HUMAN	9	CASP9|DIABLO|RIPK1|RIPK2|TRAF2|UBC|UBE2D1|UBE2D2|UBE2D3	0.578	Multi-functional protein which regulates not only caspases and apoptosis, but also modulates inflammatory signaling and immunity, mitogenic kinase signaling and cell proliferation, as well as cell invasion and metastasis. Acts as an E3 ubiquitin- protein ligase regulating NF-kappa-B signaling and regulates both canonical and non-canonical NF-kappa-B signaling by acting in opposite directions: act…
XRCC6	XRCC6_HUMAN	24	CBX5|CHAF1A|CLU|CREBBP|H2AFX|HOXC4|HTT|KAT2A|MRE11A|NCF4|NCOA6|NR1H4|PARP1|PDX1|POU2F2|PTTG1|SIRT3|TERF2|TERT|TP53|VAV1|WRN|XRCC5|XRCC6BP1	0.576	Single stranded DNA-dependent ATP-dependent helicase. Has a role in chromosome translocation. The DNA helicase II complex binds preferentially to fork-like ends of double-stranded DNA in a cell cycle-dependent manner. It works in the 3'-5' direction. Binding to DNA may be mediated by XRCC6. Involved in DNA non-homologous end joining (NHEJ) required for double-strand break repair and V(D)J recombi…
SIN3A	SIN3A_HUMAN	50	BCL6|CABIN1|COPS2|HBP1|HCFC1|HDAC1|HDAC2|HDAC9|IRF5|KLF1|KLF11|KLF16|MBD2|MBD4|MECP2|MEN1|MNT|MXD1|MYB|NCOR1|NFX1|NR0B2|OGT|PA2G4|PHF12|PML|PRMT5|RBBP4|RBBP7|REST|RUNX1T1|SAP18|SAP25|SAP30|SAP30L|SFPQ|SKI|SKIL|SMARCA2|SMARCA4|SMARCB1|SMARCC1|SPI1|SUDS3|SYT1|TAL1|TGIF1|TOPORS|TP53|ZBTB16	0.576	Acts as a transcriptional repressor. Corepressor for REST. Interacts with MXI1 to repress MYC responsive genes and antagonize MYC oncogenic activities. Also interacts with MXD1-MAX heterodimers to repress transcription by tethering SIN3A to DNA (By similarity). Acts cooperatively with OGT to repress transcription in parallel with histone deacetylation.
PML	PML_HUMAN	30	ANKRD2|BANP|CCNT1|CREBBP|DAXX|GATA2|HDAC1|HDAC2|HDAC3|HHEX|KAT5|MAPK11|MDM2|MYB|NCOR1|NCOR2|NR4A1|RARA|RB1|RPL11|SATB1|SIN3A|SKI|SP1|SRF|STAT3|SUMO1|TDG|TP53|ZBTB16	0.574	Key component of PML nuclear bodies that regulate a large number of cellular processes by facilitating post- translational modification of target proteins, promoting protein- protein contacts, or by sequestering proteins. Functions as tumor suppressor. Required for normal, caspase-dependent apoptosis in response to DNA damage, FAS, TNF, or interferons. Plays a role in transcription regulation, DN…
GTF2H1	TF2H1_HUMAN	5	E2F1|ERCC2|ESR1|RXRB|TXNRD2	0.574	Component of the core-TFIIH basal transcription factor involved in nucleotide excision repair (NER) of DNA and, when complexed to CAK, in RNA transcription by RNA polymerase II.
PLK1	PLK1_HUMAN	8	BRCA2|C13ORF34|CHEK2|NUDC|PIN1|PSMA3|PSMA4|TANK	0.574	Serine/threonine-protein kinase that performs several important functions throughout M phase of the cell cycle, including the regulation of centrosome maturation and spindle assembly, the removal of cohesins from chromosome arms, the inactivation of anaphase-promoting complex/cyclosome (APC/C) inhibitors, and the regulation of mitotic exit and cytokinesis. Polo-like kinase proteins acts by bindin…
MED18	MED18_HUMAN	6	MED1|MED12|MED13|MED17|MED20|MED21	0.574	Component of the Mediator complex, a coactivator involved in the regulated transcription of nearly all RNA polymerase II-dependent genes. Mediator functions as a bridge to convey information from gene-specific regulatory proteins to the basal RNA polymerase II transcription machinery. Mediator is recruited to promoters by direct interactions with regulatory proteins and serves as a scaffold for t…
LCK	LCK_HUMAN	11	ADAM15|CD2|CD3E|DLG1|NR2F2|PIK3CA|PTPN6|PTPRC|SYK|UBE3A|UNC119	0.574	Non-receptor tyrosine-protein kinase that plays an essential role in the selection and maturation of developing T- cells in the thymus and in the function of mature T-cells. Plays a key role in T-cell antigen receptor (TCR)-linked signal transduction pathways. Constitutively associated with the cytoplasmic portions of the CD4 and CD8 surface receptors. Association of the TCR with a peptide antige…
RAB27A	RB27A_HUMAN	8	MLPH|MYO5A|RPH3AL|SYTL1|SYTL2|SYTL3|SYTL4|SYTL5	0.574	Plays a role in cytotoxic granule exocytosis in lymphocytes. Required for both granule maturation and granule docking and priming at the immunologic synapse.
CTNNB1	CTNB1_HUMAN	47	APC|APC2|AR|AXIN1|BCL9L|BTRC|CACYBP|CBY1|CDK5R1|CHD8|CHUK|CTNNA1|CTNNBIP1|EGFR|ERBB2|FHL2|GSK3B|HIST1H1C|HNF4A|IKBKB|KAT2A|KAT2B|LEF1|MAGI1|MEN1|MLL|MUC1|NOTCH1|NR5A1|PHF17|PIK3R1|PROP1|PSEN1|PTPRF|PTPRK|RBBP5|RUVBL1|SATB1|SKP1|SLC9A3R1|SMARCA4|SMARCA5|SOX6|TBL1X|TCF4|TRRAP|USP9X	0.574	Key downstream component of the canonical Wnt signaling pathway. In the absence of Wnt, forms a complex with AXIN1, AXIN2, APC, CSNK1A1 and GSK3B that promotes phosphorylation on N-terminal Ser and Thr residues and ubiquitination of CTNNB1 via BTRC and its subsequent degradation by the proteasome. In the presence of Wnt ligand, CTNNB1 is not ubiquitinated and accumulates in the nucleus, where it …
MAP3K10	M3K10_HUMAN	5	CDC42|KIF3A|MAPK8IP1|MAPK8IP2|NEUROD1	0.572	Activates the JUN N-terminal pathway (By similarity).
WWP1	WWP1_HUMAN	6	CPSF6|ERBB4|KLF2|KLF5|RNF11|RTN4	0.572	E3 ubiquitin-protein ligase which accepts ubiquitin from an E2 ubiquitin-conjugating enzyme in the form of a thioester and then directly transfers the ubiquitin to targeted substrates. Ubiquitinates ERBB4 isoforms JM-A CYT-1 and JM-B CYT-1, KLF2, KLF5 and TP63 and promotes their proteasomal degradation. Ubiquitinates RNF11 without targeting it for degradation. Ubiquitinates and promotes degradati…
LYN	LYN_HUMAN	20	BANK1|CD22|CDK1|CENPV|CSF2RB|DOK1|EPOR|GP6|INPP5D|KIT|LCP2|MUC1|NDFIP2|NEDD9|PLCG2|PPP1R15A|PTPRC|SYK|TRPV4|UNC119	0.57	Non-receptor tyrosine-protein kinase that transmits signals from cell surface receptors and plays an important role in the regulation of innate and adaptive immune responses, hematopoiesis, responses to growth factors and cytokines, integrin signaling, but also responses to DNA damage and genotoxic agents. Functions primarily as negative regulator, but can also function as activator, depending on…
HDAC7	HDAC7_HUMAN	15	ACTN4|BCL6|EDNRA|HDAC3|KAT5|MARK2|MARK3|MEF2A|MEF2C|NCOR1|NCOR2|PPP2CA|RUNX2|UBE2I|YWHAQ	0.57	Responsible for the deacetylation of lysine residues on the N-terminal part of the core histones (H2A, H2B, H3 and H4). Histone deacetylation gives a tag for epigenetic repression and plays an important role in transcriptional regulation, cell cycle progression and developmental events. Histone deacetylases act via the formation of large multiprotein complexes. Involved in muscle maturation by re…
MED14	MED14_HUMAN	7	ESR1|HNF4A|NR3C1|PARP1|PPARGC1A|STAT2|VDR	0.57	Component of the Mediator complex, a coactivator involved in the regulated transcription of nearly all RNA polymerase II-dependent genes. Mediator functions as a bridge to convey information from gene-specific regulatory proteins to the basal RNA polymerase II transcription machinery. Mediator is recruited to promoters by direct interactions with regulatory proteins and serves as a scaffold for t…
USP4	UBP4_HUMAN	5	IGKV2D-29|PRPF3|RB1|SART3|TRIM21	0.57	Hydrolase that deubiquitinates target proteins such as the receptor ADORA2A, PDPK1 and TRIM21. Deubiquitination of ADORA2A increases the amount of functional receptor at the cell surface. Plays a role in the regulation of quality control in the ER.
KDM1A	KDM1A_HUMAN	11	CTBP1|HIST1H3A|NR2E1|PELP1|PHF21A|PPP1R12A|PRDM1|RCOR1|SNAI1|SUMO2|TP53	0.57	Histone demethylase that demethylates both 'Lys-4' (H3K4me) and 'Lys-9' (H3K9me) of histone H3, thereby acting as a coactivator or a corepressor, depending on the context. Acts by oxidizing the substrate by FAD to generate the corresponding imine that is subsequently hydrolyzed. Acts as a corepressor by mediating demethylation of H3K4me, a specific tag for epigenetic transcriptional activation. D…
MAPK3	MK03_HUMAN	8	CDC25C|DUSP3|DUSP6|GTF2I|HDAC4|MAP2K1|MAP2K2|PTPN7	0.568	Serine/threonine kinase which acts as an essential component of the MAP kinase signal transduction pathway. MAPK1/ERK2 and MAPK3/ERK1 are the 2 MAPKs which play an important role in the MAPK/ERK cascade. They participate also in a signaling cascade initiated by activated KIT and KITLG/SCF. Depending on the cellular context, the MAPK/ERK cascade mediates diverse biological functions such as cell g…
DISC1	DISC1_HUMAN	11	ACTN2|ATF5|CEP63|EIF3A|FEZ1|MAP1A|NDEL1|RANBP9|SPTBN4|SYNE1|TRAF3IP1	0.568	Involved in the regulation of multiple aspects of embryonic and adult neurogenesis. Required for neural progenitor proliferation in the ventrical/subventrical zone during embryonic brain development and in the adult dentate gyrus of the hippocampus. Participates in the Wnt-mediated neural progenitor proliferation as a positive regulator by modulating GSK3B activity and CTNNB1 abundance. Plays a r…
CRK	CRK_HUMAN	17	ARHGAP32|BCAR1|DOCK1|EGFR|EPS15|GRB2|IRS4|MAP4K1|MAPK8|NEDD9|PDGFRA|PDGFRB|PTK2|PXN|RAPGEF1|SOS1|XPO1	0.568	The Crk-I and Crk-II forms differ in their biological activities. Crk-II has less transforming activity than Crk-I. Crk- II mediates attachment-induced MAPK8 activation, membrane ruffling and cell motility in a Rac-dependent manner. Involved in phagocytosis of apoptotic cells and cell motility via its interaction with DOCK1 and DOCK4. May regulate the EFNA5-EPHA3 signaling.
CTNND1	CTND1_HUMAN	11	CDH1|COL17A1|CTTN|FYN|MUC1|NPHS1|PSEN1|PTPN6|PTPRJ|PTPRM|ZBTB33	0.568	Binds to and inhibits the transcriptional repressor ZBTB33, which may lead to activation of target genes of the Wnt signaling pathway (By similarity). May associate with and regulate the cell adhesion properties of both C- and E-cadherins. Implicated both in cell transformation by SRC and in ligand- induced receptor signaling through the EGF, PDGF, CSF-1 and ERBB2 receptors. Promotes GLIS2 C-term…
BAX	BAX_HUMAN	6	BCL2|BCL2A1|BCL2L1|SH3GLB1|SLC25A4|YWHAQ	0.568	Accelerates programmed cell death by binding to, and antagonizing the apoptosis repressor BCL2 or its adenovirus homolog E1B 19k protein. Under stress conditions, undergoes a conformation change that causes translocation to the mitochondrion membrane, leading to the release of cytochrome c that then triggers apoptosis. Promotes activation of CASP3, and thereby apoptosis.
TRADD	TRADD_HUMAN	7	FADD|KRT18|RIPK1|STAT1|TNFRSF1A|TNFRSF25|TRAF2	0.568	The nuclear form acts as a tumor suppressor by preventing ubiquitination and degradation of isoform p19ARF/ARF of CDKN2A by TRIP12: acts by interacting with TRIP12, leading to disrupt interaction between TRIP12 and isoform p19ARF/ARF of CDKN2A (By similarity). Adapter molecule for TNFRSF1A/TNFR1 that specifically associates with the cytoplasmic domain of activated TNFRSF1A/TNFR1 mediating its int…
PSEN2	PSN2_HUMAN	8	BCL2L1|CAPN1|CIB1|FHL2|FLNB|KCNIP3|KCNIP4|UBQLN1	0.566	Probable catalytic subunit of the gamma-secretase complex, an endoprotease complex that catalyzes the intramembrane cleavage of integral membrane proteins such as Notch receptors and APP (beta-amyloid precursor protein). Requires the other members of the gamma-secretase complex to have a protease activity. May play a role in intracellular signaling and gene expression or in linking chromatin to t…
VAV1	VAV_HUMAN	17	ABL1|ARHGDIB|CBL|EZH2|GRB2|JAK2|LAT|LCP2|PIK3R1|PRLR|S100B|SH3BP2|SHB|SIAH2|SLA|SYK|XRCC6	0.566	Couples tyrosine kinase signals with the activation of the Rho/Rac GTPases, thus leading to cell differentiation and/or proliferation.
HSPA4	HSP74_HUMAN	12	APAF1|BAG3|DNAJB1|EGFR|ESR1|FANCC|HIF1A|HSPBP1|PRKCB|RCOR1|STUB1|TTC1	0.564	-
INCENP	INCE_HUMAN	6	AURKA|AURKB|BIRC5|CDCA8|EVI5|H2AFZ	0.562	Component of the chromosomal passenger complex (CPC), a complex that acts as a key regulator of mitosis. The CPC complex has essential functions at the centromere in ensuring correct chromosome alignment and segregation and is required for chromatin-induced microtubule stabilization and spindle assembly. Probably acts through association with AURKB or AURKC. Seems to bind directly to microtubules…
DNAJB1	DNJB1_HUMAN	5	DNAJC3|FANCC|HSPA4|HSPA8|STUB1	0.56	Interacts with HSP70 and can stimulate its ATPase activity. Stimulates the association between HSC70 and HIP.
ABL1	ABL1_HUMAN	41	ABI1|ABI2|ABL2|ATM|ATR|BCAR1|BCR|CAT|CBL|CREB1|CRKL|DOK1|EPHB2|GPX1|GRB10|GRB2|JAK1|MDM2|NCK1|NCOA3|NFKBIA|NTRK1|PAG1|PAK2|PARK2|PSTPIP1|RAD51|RAD9A|RB1|RFX1|RYBP|SHD|SORBS2|SPTA1|SPTAN1|STK4|TOPBP1|TP73|VAV1|YTHDC1|ZDHHC16	0.56	Non-receptor tyrosine-protein kinase that plays a role in many key processes linked to cell growth and survival such as cytoskeleton remodeling in response to extracellular stimuli, cell motility and adhesion, receptor endocytosis, autophagy, DNA damage response and apoptosis. Coordinates actin remodeling through tyrosine phosphorylation of proteins controlling cytoskeleton dynamics like WASF3 (i…
RB1	RB_HUMAN	59	AATF|ABL1|AHR|AR|ARID4A|AURKB|BRCA1|BRF1|CCNA1|CCND1|CDK9|CUX1|DNMT1|E2F1|E2F4|E4F1|EID1|ENC1|FIE|FRK|HBP1|HDAC1|HDAC2|HMGA2|JUN|KAT2B|KDM4A|KDM5A|LIN9|MCM7|MDM2|MORF4L1|MYOD1|NCOA6|PA2G4|PELP1|PHB|PIK3R3|PML|PPARG|PRDM2|PRKRA|RAF1|RBBP4|RBBP7|RBBP8|RBBP9|SERPINB2|SMARCA4|SMYD2|SNAPC1|STAT3|SUV39H1|TAF1|THOC1|TRAP1|TRIP11|UBTF|USP4	0.56	Key regulator of entry into cell division that acts as a tumor suppressor. Promotes G0-G1 transition when phosphorylated by CDK3/cyclin-C. Acts as a transcription repressor of E2F1 target genes. The underphosphorylated, active form of RB1 interacts with E2F1 and represses its transcription activity, leading to cell cycle arrest. Directly involved in heterochromatin formation by maintaining overal…
TBL1X	TBL1X_HUMAN	6	CTNNB1|GPS2|HDAC3|NCOR1|NCOR2|TBL1XR1	0.558	F-box-like protein involved in the recruitment of the ubiquitin/19S proteasome complex to nuclear receptor-regulated transcription units. Plays an essential role in transcription activation mediated by nuclear receptors. Probably acts as integral component of corepressor complexes that mediates the recruitment of the 19S proteasome complex, leading to the subsequent proteasomal degradation of tra…
ID3	ID3_HUMAN	5	ELSPBP1|GATA4|SMURF2|TCF3|TCF4	0.558	ID (inhibitor of DNA binding) HLH proteins lack a basic DNA-binding domain but are able to form heterodimers with other HLH proteins, thereby inhibiting DNA binding. ID-3 inhibits the binding of E2A-containing protein complexes to muscle creatine kinase E-box enhancer. May inhibit other transcription factors.
CHTF18	CTF18_HUMAN	5	DSCC1|RFC2|RFC3|RFC4|RFC5	0.558	Chromosome cohesion factor involved in sister chromatid cohesion and fidelity of chromosome transmission. Component of one of the cell nuclear antigen loader complexes, CTF18-replication factor C (CTF18-RFC), which consists of CTF18, CTF8, DCC1, RFC2, RFC3, RFC4 and RFC5. The CTF18-RFC complex binds to single- stranded and primed DNAs and has weak ATPase activity that is stimulated by the presenc…
CCND3	CCND3_HUMAN	7	AKAP8|CDK11B|CDK4|CDKN1B|CRABP2|EIF3K|RARA	0.558	Regulatory component of the cyclin D3-CDK4 (DC) complex that phosphorylates and inhibits members of the retinoblastoma (RB) protein family including RB1 and regulates the cell-cycle during G(1)/S transition. Phosphorylation of RB1 allows dissociation of the transcription factor E2F from the RB/E2F complex and the subsequent transcription of E2F target genes which are responsible for the progressi…
SUPT5H	SPT5H_HUMAN	5	CDK7|CDK9|PIN1|PRMT1|PRMT5	0.556	Component of the DRB sensitivity-inducing factor complex (DSIF complex), which regulates mRNA processing and transcription elongation by RNA polymerase II. DSIF positively regulates mRNA capping by stimulating the mRNA guanylyltransferase activity of RNGTT/CAP1A. DSIF also acts cooperatively with the negative elongation factor complex (NELF complex) to enhance transcriptional pausing at sites pro…
HSPH1	HS105_HUMAN	5	ADD1|CFL1|PAFAH1B3|PGK1|UBA1	0.556	Prevents the aggregation of denatured proteins in cells under severe stress, on which the ATP levels decrease markedly. Inhibits HSPA8/HSC70 ATPase and chaperone activities (By similarity).
NCK2	NCK2_HUMAN	6	CD3E|EGFR|LIMS1|NTRK2|PDGFRB|PTK2	0.556	Adapter protein which associates with tyrosine- phosphorylated growth factor receptors or their cellular substrates. Maintains low levels of EIF2S1 phosphorylation by promoting its dephosphorylation by PP1. Plays a role in ELK1- dependent transcriptional activation in response to activated Ras signaling.
KAT2A	KAT2A_HUMAN	11	ADA2|BRCA1|CEBPB|CTNNB1|DDB1|HSD11B2|MYC|NOTCH1|PYGO2|TADA2A|XRCC6	0.554	Functions as a histone acetyltransferase (HAT) to promote transcriptional activation. Acetylation of histones gives a specific tag for epigenetic transcription activation. Has significant histone acetyltransferase activity with core histones, but not with nucleosome core particles. In case of HIV-1 infection, it is recruited by the viral protein Tat. Regulates Tat's transactivating activity and m…
FEZ1	FEZ1_HUMAN	10	CLASP2|DISC1|DRAP1|HTT|NBR1|RAI14|SAP30L|SMARCD1|SMC3|WWC1	0.552	May be involved in axonal outgrowth as component of the network of molecules that regulate cellular morphology and axon guidance machinery. Able to restore partial locomotion and axonal fasciculation to C.elegans unc-76 mutants in germline transformation experiments. May participate in the transport of mitochondria and other cargos along microtubules.
PPP4C	PP4C_HUMAN	9	HDAC3|IGBP1|MAP4K1|PPP4R2|PPP4R4|REL|SMEK1|TIPRL|TRAF6	0.552	Protein phosphatase that is involved in many processes such as microtubule organization at centrosomes, maturation of spliceosomal snRNPs, apoptosis, DNA repair, tumor necrosis factor (TNF)-alpha signaling, activation of c-Jun N-terminal kinase MAPK8, regulation of histone acetylation, DNA damage checkpoint signaling, NF-kappa-B activation and cell migration. The PPP4C- PPP4R1 PP4 complex may pla…
DLG3	DLG3_HUMAN	10	APC|CRIPT|DLG4|EXOC4|GDA|GRIN2A|GRIN2B|GRIN2C|PTK2B|SYNGAP1	0.552	Required for learning most likely through its role in synaptic plasticity following NMDA receptor signaling.
WDR5	WDR5_HUMAN	9	ASH2L|CHD8|HIST1H1C|HIST1H3A|HIST3H3|MLL|POU5F1|PYGO2|RBBP5	0.552	Contributes to histone modification. May position the N- terminus of histone H3 for efficient trimethylation at 'Lys-4'. As part of the MLL1/MLL complex it is involved in methylation and dimethylation at 'Lys-4' of histone H3. H3 'Lys-4' methylation represents a specific tag for epigenetic transcriptional activation. As part of the NSL complex it may be involved in acetylation of nucleosomal hist…
GTF2I	GTF2I_HUMAN	7	BTK|HDAC3|MAPK3|MYC|PIAS2|PRKG1|USF1	0.552	Interacts with the basal transcription machinery by coordinating the formation of a multiprotein complex at the C-FOS promoter, and linking specific signal responsive activator complexes. Promotes the formation of stable high-order complexes of SRF and PHOX1 and interacts cooperatively with PHOX1 to promote serum-inducible transcription of a reporter gene deriven by the C- FOS serum response elem…
PARK2	PRKN2_HUMAN	27	ABL1|AIMP2|ARR3|ARRB2|BCL2|CASK|CDK5|CUL1|EPS15|FBXW7|GPR37|HSPA1A|HSPA8|MFN1|PARK7|PDCD2|PICK1|PINK1|PSMA4|PSMC5|RANBP2|RNF41|SEPT5|SNCAIP|STUB1|SYT11|ZNF746	0.552	Functions within a multiprotein E3 ubiquitin ligase complex, catalyzing the covalent attachment of ubiquitin moieties onto substrate proteins, such as BCL2, SYT11, CCNE1, GPR37, STUB1, a 22 kDa O-linked glycosylated isoform of SNCAIP, SEPT5, ZNF746 and AIMP2. Mediates monoubiquitination as well as 'Lys-48'-linked and 'Lys-63'-linked polyubiquitination of substrates depending on the context. Parti…
PRKCZ	KPCZ_HUMAN	16	ADAP1|AKT3|C1QBP|MAP2K5|NFATC2|PARD6A|PARD6B|PAWR|PDPK1|RAF1|RELA|SP1|WWC1|YWHAB|YWHAQ|YWHAZ	0.55	Calcium- and diacylglycerol-independent serine/threonine-protein kinase that functions in phosphatidylinositol 3-kinase (PI3K) pathway and mitogen-activated protein (MAP) kinase cascade, and is involved in NF-kappa-B activation, mitogenic signaling, cell proliferation, cell polarity, inflammatory response and maintenance of long-term potentiation (LTP). Upon lipopolysaccharide (LPS) treatment in …
BTRC	FBW1A_HUMAN	16	ATF4|C13ORF34|CDC25A|CDC25B|CDC34|CTNNB1|DLG1|MYC|NFKB1|NFKB2|NFKBIA|PER1|SKP1|SMAD4|TP53|TP63	0.55	Substrate recognition component of a SCF (SKP1-CUL1-F- box protein) E3 ubiquitin-protein ligase complex which mediates the ubiquitination and subsequent proteasomal degradation of target proteins. Recognizes and binds to phosphorylated target proteins. SCF(BTRC) mediates the ubiquitination of CTNNB1 and participates in Wnt signaling. SCF(BTRC) mediates the ubiquitination of NFKBIA, NFKBIB and NFK…
SNTA1	SNTA1_HUMAN	5	DMD|GLS|MAPK12|SCN1A|SCN5A	0.55	Adapter protein that binds to and probably organizes the subcellular localization of a variety of membrane proteins. May link various receptors to the actin cytoskeleton and the extracellular matrix via the dystrophin glycoprotein complex. Plays an important role in synapse formation and in the organization of UTRN and acetylcholine receptors at the neuromuscular synapse. Binds to phosphatidylino…
EZR	EZRI_HUMAN	14	ICAM1|ICAM2|ICAM3|MSN|NF2|PALLD|PIK3R1|S100P|SDC2|SLC9A3R1|SLC9A3R2|SPN|TSC1|VCAM1	0.548	Probably involved in connections of major cytoskeletal structures to the plasma membrane. In epithelial cells, required for the formation of microvilli and membrane ruffles on the apical pole. Along with PLEKHG6, required for normal macropinocytosis.
BARD1	BARD1_HUMAN	5	BCL3|BRCA1|BRCA2|CSTF1|EWSR1	0.548	Probable E3 ubiquitin-protein ligase. The BRCA1-BARD1 heterodimer specifically mediates the formation of 'Lys-6'-linked polyubiquitin chains and coordinates a diverse range of cellular pathways such as DNA damage repair, ubiquitination and transcriptional regulation to maintain genomic stability. Plays a central role in the control of the cell cycle in response to DNA damage. Acts by mediating ub…
UNC119	U119A_HUMAN	7	ARL2|CD247|CD4|FYN|IL5RA|LCK|LYN	0.546	Myristoyl-binding protein that acts as a cargo adapter: specifically binds the myristoyl moiety of a subset of N- terminally myristoylated proteins and is required for their localization. Binds myristoylated GNAT1 and is required for G- protein localization and trafficking in sensory neurons. Binds myristoylated NPHP3; however, in contrast to UNC119B, does not seem to play a major role in ciliary…
VDAC1	VDAC1_HUMAN	5	BCL2L1|BCL2L11|DYNLT3|PRKCE|SNCA	0.546	Forms a channel through the mitochondrial outer membrane and also the plasma membrane. The channel at the outer mitochondrial membrane allows diffusion of small hydrophilic molecules; in the plasma membrane it is involved in cell volume regulation and apoptosis. It adopts an open conformation at low or zero membrane potential and a closed conformation at potentials above 30-40 mV. The open state …
CSF2RB	IL3RB_HUMAN	7	GNB2L1|JAK2|LYN|MAD2L1|PTPN11|PTPN6|YWHAZ	0.546	High affinity receptor for interleukin-3, interleukin-5 and granulocyte-macrophage colony-stimulating factor.
HCK	HCK_HUMAN	8	ADAM15|CBL|CSF3R|ELMO1|NEF|RAPGEF1|RASA1|RASA3	0.544	Non-receptor tyrosine-protein kinase found in hematopoietic cells that transmits signals from cell surface receptors and plays an important role in the regulation of innate immune responses, including neutrophil, monocyte, macrophage and mast cell functions, phagocytosis, cell survival and proliferation, cell adhesion and migration. Acts downstream of receptors that bind the Fc region of immunogl…
DTL	DTL_HUMAN	5	CDKN1A|CUL4A|CUL4B|DDB1|SETD8	0.544	Substrate-specific adapter of a DCX (DDB1-CUL4-X-box) E3 ubiquitin-protein ligase complex required for cell cycle control, DNA damage response and translesion DNA synthesis. The DCX(DTL) complex, also named CRL4(CDT2) complex, mediates the polyubiquitination and subsequent degradation of CDT1 and CDKN1A/p21(CIP1). CDT1 degradation in response to DNA damage is necessary to ensure proper cell cycle…
ITCH	ITCH_HUMAN	19	ARRB2|ATN1|CBLC|CPSF6|CXCR4|ERBB4|FYN|MLANA|N4BP1|NEDD9|NFE2|NUDT21|NUMB|POLR2A|SNX9|TP73|UBAP2L|UBC|USP9X	0.544	Acts as an E3 ubiquitin-protein ligase which accepts ubiquitin from an E2 ubiquitin-conjugating enzyme in the form of a thioester and then directly transfers the ubiquitin to targeted substrates. It catalyzes 'Lys-29'-, 'Lys-48'- and 'Lys-63'-linked ubiquitin conjugation. It is involved in the control of inflammatory signaling pathways. Is an essential component of a ubiquitin-editing protein com…
SIRT1	SIRT1_HUMAN	23	AR|ARNTL|BCL11A|CLOCK|CTTN|DBC1|ESRRA|HES1|HEY2|HNF1A|KAT2B|KAT5|MAPK8|MAPT|NBN|NCOR1|NR0B2|NR1H4|SETD7|SMAD7|TAT|TLE1|VDR	0.544	-
CSNK2A2	CSK22_HUMAN	11	ATF1|ATF2|CREBBP|CSNK2B|FOS|JUN|KLF1|NCL|PIN1|PTEN|RELA	0.544	Catalytic subunit of a constitutively active serine/threonine-protein kinase complex that phosphorylates a large number of substrates containing acidic residues C-terminal to the phosphorylated serine or threonine. Regulates numerous cellular processes, such as cell cycle progression, apoptosis and transcription, as well as viral infection. May act as a regulatory node which integrates and coordi…
VAMP2	VAMP2_HUMAN	5	RABAC1|SNAP23|SNAP25|STX1A|STX4	0.542	Involved in the targeting and/or fusion of transport vesicles to their target membrane.
CAV1	CAV1_HUMAN	9	AR|EDNRB|EGFR|ESR1|GJA1|PDGFRA|PDGFRB|PTGS2|SCP2	0.542	May act as a scaffolding protein within caveolar membranes. Interacts directly with G-protein alpha subunits and can functionally regulate their activity (By similarity). Involved in the costimulatory signal essential for T-cell receptor (TCR)- mediated T-cell activation. Its binding to DPP4 induces T-cell proliferation and NF-kappa-B activation in a T-cell receptor/CD3- dependent manner. Recruit…
CYLD	CYLD_HUMAN	5	HDAC6|IKBKG|OPTN|TRAF2|TRAIP	0.542	Protease that specifically cleaves 'Lys-63'-linked polyubiquitin chains. Has endodeubiquitinase activity. Plays an important role in the regulation of pathways leading to NF-kappa-B activation. Contributes to the regulation of cell survival, proliferation and differentiation via its effects on NF-kappa-B activation. Negative regulator of Wnt signaling. Inhibits HDAC6 and thereby promotes acetylat…
SAFB	SAFB1_HUMAN	8	ESR1|HNRNPD|NCOR1|SAFB2|SRSF1|SRSF9|TAF15|TRA2B	0.542	Binds to scaffold/matrix attachment region (S/MAR) DNA and forms a molecular assembly point to allow the formation of a 'transcriptosomal' complex (consisting of SR proteins and RNA polymerase II) coupling transcription and RNA processing (By similarity). Can function as an estrogen receptor corepressor and can also bind to the HSP27 promoter and decrease its transcription. When associated with R…
TRAF6	TRAF6_HUMAN	15	BECN1|FHL2|IKBKG|IRAK1|MALT1|MAP3K14|NUMBL|PPP4C|RANBP9|TAB2|TAX1BP1|TNFRSF11A|TNFRSF13B|UBE2N|ZNF675	0.54	E3 ubiquitin ligase that, together with UBE2N and UBE2V1, mediates the synthesis of 'Lys-63'-linked-polyubiquitin chains conjugated to proteins, such as IKBKG, AKT1 and AKT2. Also mediates ubiquitination of free/unanchored polyubiquitin chain that leads to MAP3K7 activation. Leads to the activation of NF- kappa-B and JUN. May be essential for the formation of functional osteoclasts. Seems to also…
HDAC4	HDAC4_HUMAN	29	ANKRA2|AR|BCL6|CAMK2D|CBX5|CSRP3|CTBP1|ESR1|GATA1|GNB1|HDAC3|HIF1A|MAPK1|MAPK3|MEF2A|MEF2C|NCOR1|NCOR2|NR1H2|NR2C1|NUP155|RFXANK|RL2|SMAD3|SRF|UBE2I|YWHAE|YWHAQ|ZBTB16	0.54	Responsible for the deacetylation of lysine residues on the N-terminal part of the core histones (H2A, H2B, H3 and H4). Histone deacetylation gives a tag for epigenetic repression and plays an important role in transcriptional regulation, cell cycle progression and developmental events. Histone deacetylases act via the formation of large multiprotein complexes. Involved in muscle maturation via i…
SRC	SRC_HUMAN	36	ADRB3|AHR|AR|ARHGAP32|ARNT|ASAP1|BCAR1|BRCA1|CD44|DAB2|DAG1|EPHB2|EPS8|ESR1|ESR2|GNB2L1|GRIN2A|HDAC3|HNF1A|KHDRBS1|MUC1|NCOA6|ND2|PDE6G|PLD2|PTK2|PTK2B|RAF1|RARA|RASA1|SHB|SMARCC1|SRF|STAT3|VDR|WAS	0.54	Non-receptor protein tyrosine kinase which is activated following engagement of many different classes of cellular receptors including immune response receptors, integrins and other adhesion receptors, receptor protein tyrosine kinases, G protein- coupled receptors as well as cytokine receptors. Participates in signaling pathways that control a diverse spectrum of biological activities including …
AKT1	AKT1_HUMAN	38	AKTIP|AR|BRAF|BRCA1|CDKN1B|CHUK|CREBBP|DNMT1|EZH2|FANCA|GAB2|GSK3B|ILK|IMPDH2|KRT10|MAP2K4|MAP3K11|MAP3K8|MAPK14|MDM2|MTOR|MXD1|NCOR2|NF2|NPM1|NR4A1|PKN2|PLXNA1|PRKCQ|RAF1|SETDB1|SMARCB1|SMARCC1|TCL1A|TRIB3|TSC2|XIAP|YWHAZ	0.54	AKT1 is one of 3 closely related serine/threonine- protein kinases (AKT1, AKT2 and AKT3) called the AKT kinase, and which regulate many processes including metabolism, proliferation, cell survival, growth and angiogenesis. This is mediated through serine and/or threonine phosphorylation of a range of downstream substrates. Over 100 substrate candidates have been reported so far, but for most of t…
NFKBIA	IKBA_HUMAN	17	ABL1|BTRC|CHUK|DYNLL1|FBXW11|G3BP2|HNRNPA1|IKBKB|NFKB1|RELA|RPS6KA1|SKP1|SLC25A4|SUMO4|TP53|UBC|VCP	0.54	Inhibits the activity of dimeric NF-kappa-B/REL complexes by trapping REL dimers in the cytoplasm through masking of their nuclear localization signals. On cellular stimulation by immune and proinflammatory responses, becomes phosphorylated promoting ubiquitination and degradation, enabling the dimeric RELA to translocate to the nucleus and activate transcription.
ESRRA	ERR1_HUMAN	5	DPF2|ESRRG|HDAC8|KAT2B|SIRT1	0.538	Binds to an ERR-alpha response element (ERRE) containing a single consensus half-site, 5'-TNAAGGTCA-3'. Can bind to the medium-chain acyl coenzyme A dehydrogenase (MCAD) response element NRRE-1 and may act as an important regulator of MCAD promoter. Binds to the C1 region of the lactoferrin gene promoter. Requires dimerization and the coactivator, PGC-1A, for full activity. The ERRalpha/PGC1alpha…
BCL2L1	B2CL1_HUMAN	20	AVEN|BAD|BAK1|BAX|BCAP31|BCL2|BCL2L11|BIK|BLID|BNIP3|BNIPL|HRK|IKZF3|PMAIP1|PPP1CA|PSEN2|RAD9A|RTN1|RTN4|VDAC1	0.538	Potent inhibitor of cell death. Inhibits activation of caspases (By similarity). Appears to regulate cell death by blocking the voltage-dependent anion channnel (VDAC) by binding to it and preventing the release of the caspase activator, CYC1, from the mitochondrial membrane. Also acts as a regulator of G2 checkpoint and progression to cytokinesis during mitosis.
RPA2	RFA2_HUMAN	9	CCNO|MEN1|PRKDC|RFWD3|RPA4|SERTAD3|STAT3|UNG|XPA	0.536	Required for DNA recombination, repair and replication. The activity of RP-A is mediated by single-stranded DNA binding and protein interactions. Required for the efficient recruitment of the DNA double-strand break repair factor RAD51 to chromatin in response to DNA damage.
CDK2	CDK2_HUMAN	14	BRCA1|CCNA1|CCNA2|CCNE1|CDK2AP1|CDKN1A|CDKN3|CEBPA|CHAF1A|FEN1|IKBKG|ORC1L|RBL2|SKP2	0.536	Serine/threonine-protein kinase involved in the control of the cell cycle; essential for meiosis, but dispensable for mitosis. Phosphorylates CTNNB1, USP37, p53/TP53, NPM1, CDK7, RB1, BRCA2, MYC, NPAT, EZH2. Interacts with cyclins A, B1, B3, D, or E. Triggers duplication of centrosomes and DNA. Acts at the G1-S transition to promote the E2F transcriptional program and the initiation of DNA synthe…
PGR	PRGR_HUMAN	5	CUEDC2|KLF9|NCOR2|NR0B1|UBE3A	0.536	The steroid hormones and their receptors are involved in the regulation of eukaryotic gene expression and affect cellular proliferation and differentiation in target tissues. Progesterone receptor isoform B (PRB) is involved activation of c-SRC/MAPK signaling on hormone stimulation.
GRIP1	GRIP1_HUMAN	10	CARM1|EP300|ESR1|GRIA2|GRIA3|GRIA4|GRIK3|GRIPAP1|GRM3|THRA	0.536	May play a role as a localized scaffold for the assembly of a multiprotein signaling complex and as mediator of the trafficking of its binding partners at specific subcellular location in neurons.
INPP5D	SHIP1_HUMAN	5	CRKL|DOK1|GRB2|LYN|PECAM1	0.534	Phosphatidylinositol (PtdIns) phosphatase that specifically hydrolyzes the 5-phosphate of phosphatidylinositol- 3,4,5-trisphosphate (PtdIns(3,4,5)P3) to produce PtdIns(3,4)P2, thereby negatively regulating the PI3K (phosphoinositide 3-kinase) pathways. Acts as a negative regulator of B-cell antigen receptor signaling. Mediates signaling from the FC-gamma-RIIB receptor (FCGR2B), playing a central …
IKBKG	NEMO_HUMAN	18	BCL10|CALB1|CDK2|CHUK|CYLD|IKBKB|IRAK1|NCOA3|RNF7|SENP2|SYT1|TANK|TBK1|TNFAIP3|TNIP1|TRAF3IP2|TRAF6|UBC	0.534	Regulatory subunit of the IKK core complex which phosphorylates inhibitors of NF-kappa-B thus leading to the dissociation of the inhibitor/NF-kappa-B complex and ultimately the degradation of the inhibitor. Its binding to scaffolding polyubiquitin seems to play a role in IKK activation by multiple signaling receptor pathways. However, the specific type of polyubiquitin recognized upon cell stimul…
CDK4	CDK4_HUMAN	9	BRCA1|CCND1|CCND3|CDC37|CDKN1B|CDKN2A|CDKN2C|CEBPA|MYOD1	0.534	Ser/Thr-kinase component of cyclin D-CDK4 (DC) complexes that phosphorylate and inhibit members of the retinoblastoma (RB) protein family including RB1 and regulate the cell-cycle during G(1)/S transition. Phosphorylation of RB1 allows dissociation of the transcription factor E2F from the RB/E2F complexes and the subsequent transcription of E2F target genes which are responsible for the progressi…
APP	A4_HUMAN	12	APBA1|APBA2|APBA3|APBB1|APPBP2|FBLN1|GSN|HSD17B10|NAE1|SHC1|SYVN1|UBC	0.534	N-APP binds TNFRSF21 triggering caspase activation and degeneration of both neuronal cell bodies (via caspase-3) and axons (via caspase-6).
SDCBP	SDCB1_HUMAN	8	EFNB1|GRIK1|GRIK2|IL5RA|NF2|RAB5A|SOX4|ULK1	0.532	Seems to function as an adapter protein. In adherens junctions may function to couple syndecans to cytoskeletal proteins or signaling components. Seems to couple transcription factor SOX4 to the IL-5 receptor (IL5RA). May also play a role in vesicular trafficking. Seems to be required for the targeting of TGFA to the cell surface in the early secretory pathway.
BCR	BCR_HUMAN	9	ABL1|CRKL|ERCC3|FES|GRB10|GRB2|MLLT4|PIK3CG|TSG101	0.532	GTPase-activating protein for RAC1 and CDC42. Promotes the exchange of RAC or CDC42-bound GDP by GTP, thereby activating them. Displays serine/threonine kinase activity.
FANCL	FANCL_HUMAN	5	FANCB|HES1|PCNA|UBE2T|UBE2W	0.532	Ubiquitin ligase protein that mediates monoubiquitination of FANCD2, a key step in the DNA damage pathway. Also mediates monoubiquitination of FANCI. May stimulate the ubiquitin release from UBE2W. May be required for proper primordial germ cell proliferation in the embryonic stage, whereas it is probably not needed for spermatogonial proliferation after birth.
PTPN6	PTN6_HUMAN	22	CD22|CD33|CD72|CSF2RB|CTNND1|EGFR|EPOR|FCRL3|HOXA10|KIT|LAIR1|LCK|LCP2|LILRB4|NR5A2|PECAM1|PILRA|PRKCD|PTK2B|ROS1|SYK|TYK2	0.532	Modulates signaling by tyrosine phosphorylated cell surface receptors such as KIT and the EGF receptor/EGFR. The SH2 regions may interact with other cellular components to modulate its own phosphatase activity against interacting substrates. Together with MTUS1, induces UBE2V2 expression upon angiotensin II stimulation. Plays a key role in hematopoiesis.
CARM1	CARM1_HUMAN	12	CEBPB|CREBBP|EP300|FOS|GRIP1|H3F3A|NCOA2|NCOA3|RELA|SMARCA4|SRCAP|STAT5A	0.53	Methylates (mono- and asymmetric dimethylation) the guanidino nitrogens of arginyl residues in several proteins involved in DNA packaging, transcription regulation, pre-mRNA splicing, and mRNA stability. Recruited to promoters upon gene activation together with histone acetyltransferases from EP300/P300 and p160 families, methylates histone H3 at 'Arg-17' (H3R17me), forming mainly asymmetric dime…
U2AF1	U2AF1_HUMAN	5	NXF1|RP9|SRSF1|U2AF2|ZRANB2	0.53	Plays a critical role in both constitutive and enhancer- dependent splicing by mediating protein-protein interactions and protein-RNA interactions required for accurate 3'-splice site selection. Recruits U2 snRNP to the branch point. Directly mediates interactions between U2AF2 and proteins bound to the enhancers and thus may function as a bridge between U2AF2 and the enhancer complex to recruit …
CSNK2A1	CSK21_HUMAN	26	APC|AT3G03773|ATF1|ATF2|CDC25B|CHEK1|CREBBP|CSNK2B|DDIT3|FGF1|FGF2|FOS|HDAC1|HDAC2|HIRIP3|HNRNPA2B1|JUN|KLF1|MAPK14|PIN1|PLEKHO1|PPBP|PTEN|RELA|TNP1|UBTF	0.53	Catalytic subunit of a constitutively active serine/threonine-protein kinase complex that phosphorylates a large number of substrates containing acidic residues C-terminal to the phosphorylated serine or threonine. Regulates numerous cellular processes, such as cell cycle progression, apoptosis and transcription, as well as viral infection. May act as a regulatory node which integrates and coordi…
GADD45B	GA45B_HUMAN	5	GADD45GIP1|MAP2K7|MAP3K4|MAP3K5|PCNA	0.53	Involved in the regulation of growth and apoptosis. Mediates activation of stress-responsive MTK1/MEKK4 MAPKKK.
CBL	CBL_HUMAN	31	ABL1|ARHGEF7|CD2AP|CDC42|CRKL|CSF1R|EPHB1|FRS2|FYN|GRB2|HCK|IGF1R|MET|MYH9|NGFR|PDGFRA|PLCG1|SH2B2|SLA|SLA2|SORBS2|SPRY2|STAP2|SYK|UBASH3A|UBASH3B|UBC|UBE2L3|VAV1|YWHAB|YWHAQ	0.528	Adapter protein that functions as a negative regulator of many signaling pathways that are triggered by activation of cell surface receptors. Acts as an E3 ubiquitin-protein ligase, which accepts ubiquitin from specific E2 ubiquitin-conjugating enzymes, and then transfers it to substrates promoting their degradation by the proteasome. Recognizes activated receptor tyrosine kinases, including KIT,…
RHOA	RHOA_HUMAN	27	ARHGAP1|ARHGAP5|ARHGDIA|ARHGEF11|ARHGEF3|CIT|DGKQ|DIAP3|DIAPH1|GEFT|GRLF1|ITPR1|KCNA2|MPRIP|NET1|OTUB1|PKN1|PKN2|PLCG1|PLD1|RAP1GDS1|ROCK1|RTKN|SMURF1|TRIO|TRPC1|UBC	0.528	Regulates a signal transduction pathway linking plasma membrane receptors to the assembly of focal adhesions and actin stress fibers. Involved in a microtubule-dependent signal that is required for the myosin contractile ring formation during cell cycle cytokinesis. Plays an essential role in cleavage furrow formation. Required for the apical junction formation of keratinocyte cell-cell adhesion.…
DLGAP1	DLGP1_HUMAN	5	DLG1|DLG4|DYNLL1|DYNLL2|SHANK2	0.528	Part of the postsynaptic scaffold in neuronal cells.
PTEN	PTEN_HUMAN	7	AR|CSNK2A1|CSNK2A2|MAGI3|MVP|NEDD4|UBC	0.526	Tumor suppressor. Acts as a dual-specificity protein phosphatase, dephosphorylating tyrosine-, serine- and threonine- phosphorylated proteins. Also acts as a lipid phosphatase, removing the phosphate in the D3 position of the inositol ring from phosphatidylinositol 3,4,5-trisphosphate, phosphatidylinositol 3,4-diphosphate, phosphatidylinositol 3- phosphate and inositol 1,3,4,5-tetrakisphosphate w…
CDK1	CDK1_HUMAN	14	CCNA1|CCNA2|CCNB1|CDKN3|DAB2|EZH2|FANCC|FANCG|FOXM1|GADD45A|HMGB1|LATS1|LYN|TP53	0.526	Plays a key role in the control of the eukaryotic cell cycle by modulating the centrosome cycle as well as mitotic onset; promotes G2-M transition, and regulates G1 progress and G1-S transition via association with multiple interphase cyclins. Required in higher cells for entry into S-phase and mitosis. Phosphorylates PARVA/actopaxin, APC, AMPH, APC, BARD1, Bcl- xL/BCL2L1, BRCA2, CALD1, CASP8, CD…
NR0B1	NR0B1_HUMAN	6	COPS2|NR5A1|NRIP1|PGR|POU5F1|SREBF1	0.526	Orphan nuclear receptor. Component of a cascade required for the development of the hypothalamic-pituitary-adrenal-gonadal axis. Acts as a coregulatory protein that inhibits the transcriptional activity of other nuclear receptors through heterodimeric interactions. May also have a role in the development of the embryo and in the maintenance of embryonic stem cell pluripotency (By similarity).
USHBP1	USBP1_HUMAN	5	BET1|EXOC8|NOC4L|SERTAD3|USH1C	0.526	-
PPFIA1	LIPA1_HUMAN	6	ERC2|GIT1|PPP2R5D|PTPRD|PTPRF|PTPRS	0.526	May regulate the disassembly of focal adhesions. May localize receptor-like tyrosine phosphatases type 2A at specific sites on the plasma membrane, possibly regulating their interaction with the extracellular environment and their association with substrates.
TRAIP	TRAIP_HUMAN	5	CYLD|FLII|TRAF1|TRAF2|UBC	0.526	Inhibits activation of NF-kappa-B mediated by TNF (By similarity).
NLK	NLK_HUMAN	6	CHD7|FOXO4|HIPK2|MYB|MYBL1|PPARG	0.524	Serine/threonine-protein kinase that regulates a number of transcription factors with key roles in cell fate determination. Positive effector of the non-canonical Wnt signaling pathway, acting downstream of WNT5A, MAP3K7/TAK1 and HIPK2. Activation of this pathway causes binding to and phosphorylation of the histone methyltransferase SETDB1. The NLK- SETDB1 complex subsequently interacts with PPAR…
HDAC5	HDAC5_HUMAN	17	BCL6|CBX5|GATA1|GNB1|HIF1A|MEF2A|NCOR1|NCOR2|NFATC1|PHB2|PKN2|PRKAB1|RFXANK|RL2|SMAD3|YWHAQ|ZBTB16	0.524	Responsible for the deacetylation of lysine residues on the N-terminal part of the core histones (H2A, H2B, H3 and H4). Histone deacetylation gives a tag for epigenetic repression and plays an important role in transcriptional regulation, cell cycle progression and developmental events. Histone deacetylases act via the formation of large multiprotein complexes. Involved in muscle maturation by re…
REST	REST_HUMAN	7	CDYL|HDAC1|RCOR1|SIN3A|SIN3B|SUB1|TBP	0.524	Transcriptional repressor which binds neuron-restrictive silencer element (NRSE) and represses neuronal gene transcription in non-neuronal cells. Restricts the expression of neuronal genes by associating with two distinct corepressors, mSin3 and CoREST, which in turn recruit histone deacetylase to the promoters of REST-regulated genes. Mediates repression by recruiting the BHC complex at RE1/NRSE…
UBE2D3	UB2D3_HUMAN	8	BIRC2|BIRC3|BRCA1|DTX3L|NEDD4|RNF11|RNF125|XIAP	0.524	Accepts ubiquitin from the E1 complex and catalyzes its covalent attachment to other proteins. In vitro catalyzes 'Lys- 11'-, as well as 'Lys-48'-linked polyubiquitination. Cooperates with the E2 CDC34 and the SCF(FBXW11) E3 ligase complex for the polyubiquitination of NFKBIA leading to its subsequent proteasomal degradation. Acts as an initiator E2, priming the phosphorylated NFKBIA target at po…
UBE2L3	UB2L3_HUMAN	8	ARIH1|ARIH2|CBL|NEDD4|RNF144A|RNF144B|UBE3A|UBOX5	0.524	Ubiquitin-conjugating enzyme E2 that specifically acts with HECT-type and RBR family E3 ubiquitin-protein ligases. Does not function with most RING-containing E3 ubiquitin-protein ligases because it lacks intrinsic E3-independent reactivity with lysine: in contrast, it has activity with the RBR family E3 enzymes, such as PARK2 and ARIH1, that function like function like RING-HECT hybrids. Accepts…
AR	ANDR_HUMAN	78	AES|AKT1|BAG1|BRCA1|CALM1|CAV1|CCND1|CDK7|CDK9|COX5B|CREBBP|CTNNB1|DAXX|DCC|EFCAB6|FHL2|FOXA1|FOXO1|GADD45GIP1|GAPDH|GNB2L1|GSK3B|GSN|HDAC1|HDAC4|HSP90AA1|KAT5|MAGEA11|MED1|MYST2|NCOA1|NCOA2|NCOA3|NCOA4|NCOA6|NCOR1|NCOR2|NONO|NR0B2|NR2C1|NR2C2|NSD1|PA2G4|PAK6|PELP1|PIAS2|PRPF6|PTEN|RAD54L2|RAD9A|RANBP9|RB1|RCHY1|RNF14|RNF4|RNF6|SART3|SFPQ|SIRT1|SMAD3|SMAD4|SMARCA2|SMARCA4|SMARCC1|SRC|SREBF1|SRY|S…	0.524	Steroid hormone receptors are ligand-activated transcription factors that regulate eukaryotic gene expression and affect cellular proliferation and differentiation in target tissues. Transcription factor activity is modulated by bound coactivator and corepressor proteins. Transcription activation is down-regulated by NR0B2. Activated, but not phosphorylated, by HIPK3 and ZIPK/DAPK3.
LMO4	LMO4_HUMAN	5	BRCA1|ESR1|HDAC2|MTA1|RBBP8	0.522	Probable transcriptional factor (By similarity).
GRIN2A	NMDE1_HUMAN	6	DLG1|DLG3|DLG4|FYN|IL16|SRC	0.522	NMDA receptor subtype of glutamate-gated ion channels possesses high calcium permeability and voltage-dependent sensitivity to magnesium. Activation requires binding of agonist to both types of subunits.
FADD	FADD_HUMAN	13	ABCA1|CASP10|CASP8|CFLAR|DAP3|DEDD|FAS|MBD4|NACA|PEA15|RIPK1|TRADD|TRIM21	0.52	Apoptotic adaptor molecule that recruits caspase-8 or caspase-10 to the activated Fas (CD95) or TNFR-1 receptors. The resulting aggregate called the death-inducing signaling complex (DISC) performs caspase-8 proteolytic activation. Active caspase-8 initiates the subsequent cascade of caspases mediating apoptosis. Involved in interferon-mediated antiviral immune response, playing a role in the pos…
ID1	ID1_HUMAN	6	CASK|ELSPBP1|GATA4|MYOD1|SMURF2|TCF3	0.52	ID (inhibitor of DNA binding) HLH proteins lack a basic DNA-binding domain but are able to form heterodimers with other HLH proteins, thereby inhibiting DNA binding.
NR5A1	STF1_HUMAN	7	CTNNB1|NR0B1|NRIP1|SOX9|SP1|TRERF1|ZNF653	0.52	Transcriptional activator. Seems to be essential for sexual differentiation and formation of the primary steroidogenic tissues. Binds to the Ad4 site found in the promoter region of steroidogenic P450 genes such as CYP11A, CYP11B and CYP21B. Also regulates the AMH/Muellerian inhibiting substance gene as well as the AHCH and STAR genes. 5'-YCAAGGYC-3' and 5'-RRAGGTCA-3' are the consensus sequences…
HDAC1	HDAC1_HUMAN	93	APPL1|AR|ATM|BCL11B|BCL6|BHLHE41|CCDC6|CDKN1A|CDYL|CEBPD|CHD4|CHFR|CNTN2|CREB1|CREM|CSNK2A1|CTBP1|DAXX|DMAP1|DNMT1|DNMT3A|DNMT3B|DNMT3L|E4F1|ENO1|EP300|ESR1|FRA10F|GATAD2B|GRLF1|H2AFY|HDAC9|HELLS|HIF1A|HNRNPD|HUS1|IRF5|KLF5|MBD2|MBD3|MBD4|MBTPS1|MDM2|MECOM|MECP2|MIER1|MLL|MTA1|MYC|MYOD1|NFE4|NFKB1|NKX2-5|NKX3-2|NR0B2|NUP98|PADI4|PARP1|PCNA|PHB|PHB2|PML|PPARD|PPARG|RB1|RBBP4|RBL1|RCOR1|RELA|REPIN1…	0.52	Responsible for the deacetylation of lysine residues on the N-terminal part of the core histones (H2A, H2B, H3 and H4). Histone deacetylation gives a tag for epigenetic repression and plays an important role in transcriptional regulation, cell cycle progression and developmental events. Histone deacetylases act via the formation of large multiprotein complexes. Deacetylates SP proteins, SP1 and S…
RRAS	RRAS_HUMAN	5	BCL2|NCK1|RAF1|RALGDS|RASSF5	0.52	Regulates the organization of the actin cytoskeleton.
HMGA1	HMGA1_HUMAN	9	CEBPB|CREBBP|JUN|POU2F1|POU2F2|PPARG|PRMT6|RARA|SP1	0.52	HMG-I/Y bind preferentially to the minor groove of A+T rich regions in double stranded DNA. It is suggested that these proteins could function in nucleosome phasing and in the 3'-end processing of mRNA transcripts. They are also involved in the transcription regulation of genes containing, or in close proximity to A+T-rich regions.
TRIB3	TRIB3_HUMAN	10	AKT1|ATF4|ATF5|CSNK2B|FN1|GRN|LTBP4|MCM3AP|SIAH1|TIAF1	0.518	Disrupts insulin signaling by binding directly to Akt kinases and blocking their activation. May bind directly to and mask the 'Thr-308' phosphorylation site in AKT1. Binds to ATF4 and inhibits its transcriptional activation activity. Interacts with the NF-kappa-B transactivator p65 RELA and inhibits its phosphorylation and thus its transcriptional activation activity. Interacts with MAPK kinases…
HDAC9	HDAC9_HUMAN	17	CBX5|HDAC1|HDAC3|MAML1|MAPK10|MAPK8|MAPK9|MEF2A|NCOR1|PKD1|RFXANK|RL2|SIN3A|SUV39H1|SYK|TRIM29|YWHAE	0.518	Responsible for the deacetylation of lysine residues on the N-terminal part of the core histones (H2A, H2B, H3 and H4). Histone deacetylation gives a tag for epigenetic repression and plays an important role in transcriptional regulation, cell cycle progression and developmental events. Represses MEF2-dependent transcription.
CDC20	CDC20_HUMAN	11	ANAPC7|BUB1B|CCNA1|CCNA2|CDC16|CDC27|FBXO5|HSF1|MAD2L1|RASSF1|SPATC1	0.518	Required for full ubiquitin ligase activity of the anaphase promoting complex/cyclosome (APC/C) and may confer substrate specificity upon the complex. Is regulated by MAD2L1: in metaphase the MAD2L1-CDC20-APC/C ternary complex is inactive and in anaphase the CDC20-APC/C binary complex is active in degrading substrates. The CDC20-APC/C complex positively regulates the formation of synaptic vesicle…
PRKCA	KPCA_HUMAN	6	C1QBP|CHUK|FSCN1|IKBKB|OGG1|TRIM41	0.518	Calcium-activated, phospholipid- and diacylglycerol (DAG)-dependent serine/threonine-protein kinase that is involved in positive and negative regulation of cell proliferation, apoptosis, differentiation, migration and adhesion, tumorigenesis, cardiac hypertrophy, angiogenesis, platelet function and inflammation, by directly phosphorylating targets such as RAF1, BCL2, CSPG4, TNNT2/CTNT, or activat…
TOP2A	TOP2A_HUMAN	6	BRCA1|CDT1|HDAC1|MAPK1|SUMO1|TP53	0.516	Control of topological states of DNA by transient breakage and subsequent rejoining of DNA strands. Topoisomerase II makes double-strand breaks.
GNB2L1	GBLP_HUMAN	22	AGTRAP|AR|CCNA1|CSF2RB|EIF6|FBXW7|FYN|HABP4|IFNAR2|ITGB2|JAK1|NSMAF|PDE4D|PRKCB|PRKCE|PTPRM|RASA1|SRC|ST7|STAT1|TP73|TYK2	0.516	Involved in the recruitment, assembly and/or regulation of a variety of signaling molecules. Interacts with a wide variety of proteins and plays a role in many cellular processes. Component of the 40S ribosomal subunit involved in translational repression. Binds to and stabilizes activated protein kinase C (PKC), increasing PKC-mediated phosphorylation. May recruit activated PKC to the ribosome, …
GOLGA2	GOGA2_HUMAN	5	GORASP1|GORASP2|RAB1A|RAB1B|RAB2A	0.516	Golgi auto-antigen; probably involved in maintaining cis-Golgi structure.
MAP3K12	M3K12_HUMAN	5	EGFR|MAP2K7|MAPK8IP1|MAPK8IP2|MBIP	0.516	May be an activator of the JNK/SAPK pathway. Phosphorylates beta-casein, histone 1 and myelin basic protein in vitro.
EPB41L1	E41L1_HUMAN	5	AGAP2|DRD2|DRD3|ITPR1|NUMA1	0.516	May function to confer stability and plasticity to neuronal membrane via multiple interactions, including the spectrin-actin-based cytoskeleton, integral membrane channels and membrane-associated guanylate kinases.
SUV39H1	SUV91_HUMAN	16	BCL11B|CABIN1|CBX4|CBX5|CNTN2|DNMT3A|EPC2|HDAC1|HDAC2|HDAC3|HDAC9|MBD1|MECOM|MYOD1|RB1|RUNX1	0.514	Histone methyltransferase that specifically trimethylates 'Lys-9' of histone H3 using monomethylated H3 'Lys- 9' as substrate. Also weakly methylates histone H1 (in vitro). H3 'Lys-9' trimethylation represents a specific tag for epigenetic transcriptional repression by recruiting HP1 (CBX1, CBX3 and/or CBX5) proteins to methylated histones. Mainly functions in heterochromatin regions, thereby pla…
HDAC2	HDAC2_HUMAN	30	APPL1|BCL11B|CBX7|CIITA|CSNK2A1|CTBP1|DAXX|DNMT1|DNMT3B|EED|IRS1|KLF4|LMO4|MBD2|MTA1|MXD1|PADI4|PARP1|PHF21A|PML|PPP1R8|PRDM1|RB1|RELA|SIN3A|SUV39H1|TOP2B|TP53|WHSC1|YY1	0.514	Responsible for the deacetylation of lysine residues on the N-terminal part of the core histones (H2A, H2B, H3 and H4). Histone deacetylation gives a tag for epigenetic repression and plays an important role in transcriptional regulation, cell cycle progression and developmental events. Histone deacetylases act via the formation of large multiprotein complexes. Forms transcriptional repressor com…
DCC	DCC_HUMAN	7	APPL1|AR|CASP3|MAZ|NTN1|PTK2|RPL5	0.514	Receptor for netrin required for axon guidance. Mediates axon attraction of neuronal growth cones in the developing nervous system upon ligand binding. Its association with UNC5 proteins may trigger signaling for axon repulsion. It also acts as a dependence receptor required for apoptosis induction when not associated with netrin ligand. Implicated as a tumor suppressor gene.
BCL11B	BC11B_HUMAN	10	HDAC1|HDAC2|MBD3|MTA1|MTA2|NR2F1|RBBP4|RBBP7|SP1|SUV39H1	0.514	Tumor-suppressor protein involved in T-cell lymphomas. May function on the P53-signaling pathway. May be a key regulator of both differentiation and survival during thymocyte development. Repress transcription through direct, TFCOUP2-independent binding to a GC-rich response element (By similarity).
MAP3K11	M3K11_HUMAN	5	AKT1|CDC42|MAPK8IP1|MAPK8IP2|SH3RF1	0.514	Activates the JUN N-terminal pathway. Required for serum-stimulated cell proliferation and for mitogen and cytokine activation of MAPK14 (p38), MAPK3 (ERK) and MAPK8 (JNK1) through phosphorylation and activation of MAP2K4/MKK4 and MAP2K7/MKK7. Plays a role in mitogen-stimulated phosphorylation and activation of BRAF, but does not phosphorylate BRAF directly. Influences microtubule organization du…
EIF3A	EIF3A_HUMAN	5	DISC1|EIF3B|EIF3G|EIF4B|FBXO32	0.512	Component of the eukaryotic translation initiation factor 3 (eIF-3) complex, which is required for several steps in the initiation of protein synthesis. The eIF-3 complex associates with the 40S ribosome and facilitates the recruitment of eIF-1, eIF-1A, eIF-2:GTP:methionyl-tRNAi and eIF-5 to form the 43S preinitiation complex (43S PIC). The eIF-3 complex stimulates mRNA recruitment to the 43S PIC…
FBXW7	FBXW7_HUMAN	10	CCNE1|CCNE2|GNB2L1|KLF5|MYB|MYC|PARK2|PPARGC1A|SKP1|SREBF1	0.51	Substrate recognition component of a SCF (SKP1-CUL1-F- box protein) E3 ubiquitin-protein ligase complex which mediates the ubiquitination and subsequent proteasomal degradation of target proteins. Probably recognizes and binds to phosphorylated target proteins. Involved in the degradation of cyclin-E, MYC, NOTCH1 released notch intracellular domain (NICD), and probably PSEN1.
ZBTB16	ZBT16_HUMAN	19	AGTR1|BCL6|BMI1|FHL2|GATA2|HBEGF|HDAC1|HDAC4|HDAC5|HDAC6|NCOR1|NCOR2|PML|RARA|RUNX1T1|SIN3A|SIN3B|VDR|ZBTB32	0.51	Probable transcription factor. May play a role in myeloid maturation and in the development and/or maintenance of other differentiated tissues. Probable substrate-recognition component of an E3 ubiquitin-protein ligase complex which mediates the ubiquitination and subsequent proteasomal degradation of target proteins.
COL17A1	COHA1_HUMAN	5	ACTN1|ACTN4|CTNND1|ITGB4|KRT18	0.508	May play a role in the integrity of hemidesmosome and the attachment of basal keratinocytes to the underlying basement membrane.
BTK	BTK_HUMAN	5	GNAQ|GTF2I|IBTK|PRKD1|SH3BP5	0.508	Non-receptor tyrosine kinase indispensable for B lymphocyte development, differentiation and signaling. Binding of antigen to the B-cell antigen receptor (BCR) triggers signaling that ultimately leads to B-cell activation. After BCR engagement and activation at the plasma membrane, phosphorylates PLCG2 at several sites, igniting the downstream signaling pathway through calcium mobilization, follo…
DAG1	DAG1_HUMAN	7	CAV3|CSK|FYN|GRB2|NCK1|SHC1|SRC	0.508	Beta-dystroglycan is a transmembrane protein that plays important roles in connecting the extracellular matrix to the cytoskeleton. Acts as a cell adhesion receptor in both muscle and non-muscle tissues. Receptor for both DMD and UTRN and, through these interactions, scaffolds axin to the cytoskeleton. Also functions in cell adhesion-mediated signaling and implicated in cell polarity.
ADAP1	ADAP1_HUMAN	6	CSNK1A1|NCL|PIK3CA|PRKCI|PRKCZ|PRKD1	0.506	GTPase-activating protein for the ADP ribosylation factor family (Probable). Binds phosphatidylinositol 3,4,5- trisphosphate (PtdInsP3) and inositol 1,3,4,5-tetrakisphosphate (InsP4).
CCDC85B	CC85B_HUMAN	7	C19ORF25|CHCHD3|KIAA1267|KRT17|KRT6A|PKN1|TCEANC	0.506	Functions as a transcriptional repressor. May inhibit the activity of CTNNB1 in a TP53-dependent manner and thus regulate cell growth. May function in adipocyte differentiation, negatively regulating mitotic clonal expansion.
DLG1	DLG1_HUMAN	16	ADAM17|AKAP5|ATP2B2|BTRC|CAMK2A|CASK|DLGAP1|GPR124|GRIA1|GRIN2A|KCNA4|KCNJ12|KCNJ4|KIF13B|LCK|TJAP1	0.504	Essential multidomain scaffolding protein required for normal development (By similarity). Recruits channels, receptors and signaling molecules to discrete plasma membrane domains in polarized cells. May play a role in adherens junction assembly, signal transduction, cell proliferation, synaptogenesis and lymphocyte activation. Regulates the excitability of cardiac myocytes by modulating the func…
AMPH	AMPH_HUMAN	7	CABIN1|CDK5R1|DNM1|PLD1|PLD2|SYNJ1|TNK2	0.504	May participate in mechanisms of regulated exocytosis in synapses and certain endocrine cell types. May control the properties of the membrane associated cytoskeleton.
SMAD7	SMAD7_HUMAN	10	EP300|HDAC1|PIAS4|SIRT1|SMAD4|SMAD6|TGFBR1|UCHL5|YAP1|ZEB1	0.504	Antagonist of signaling by TGF-beta (transforming growth factor) type 1 receptor superfamily members; has been shown to inhibit TGF-beta (Transforming growth factor) and activin signaling by associating with their receptors thus preventing SMAD2 access. Functions as an adapter to recruit SMURF2 to the TGF-beta receptor complex. Also acts by recruiting the PPP1R15A- PP1 complex to TGFBR1, which pr…
STAT3	STAT3_HUMAN	24	AR|CCND1|CDK9|CREBBP|ELP2|EP300|JAK1|JUN|MTOR|MYOD1|NCOA1|NDUFA13|NFKB1|NFKBIZ|NR3C1|PELP1|PML|RAC1|RB1|RELA|RPA2|SMARCA4|SRC|TRIP10	0.504	Signal transducer and transcription activator that mediates cellular responses to interleukins, KITLG/SCF and other growth factors. May mediate cellular responses to activated FGFR1, FGFR2, FGFR3 and FGFR4. Binds to the interleukin-6 (IL-6)- responsive elements identified in the promoters of various acute- phase protein genes. Activated by IL31 through IL31RA.
ATXN3	ATX3_HUMAN	10	CREBBP|EP300|HDAC3|KAT2B|NCOR1|RAD23A|RAD23B|STUB1|UBC|VCP	0.504	Deubiquitinating enzyme involved in protein homeostasis maintenance, transcription, cytoskeleton regulation, myogenesis and degradation of misfolded chaperone substrates. Binds long polyubiquitin chains and trims them, while it has weak or no activity against chains of 4 or less ubiquitins. Involved in degradation of misfolded chaperone substrates via its interaction with STUB1/CHIP: recruited to…
SYVN1	SYVN1_HUMAN	5	APP|DERL1|GPR37|HERPUD1|VCP	0.504	Acts as an E3 ubiquitin-protein ligase which accepts ubiquitin specifically from endoplasmic reticulum-associated UBC7 E2 ligase and transfers it to substrates, promoting their degradation. Component of the endoplasmic reticulum quality control (ERQC) system also called ER-associated degradation (ERAD) involved in ubiquitin-dependent degradation of misfolded endoplasmic reticulum proteins. Also p…
SMARCC1	SMRC1_HUMAN	8	ADD1|AKT1|AR|MYC|SIN3A|SMARCB1|SMARCE1|SRC	0.502	Involved in transcriptional activation and repression of select genes by chromatin remodeling (alteration of DNA-nucleosome topology). May stimulate the ATPase activity of the catalytic subunit of the complex. Also involved in vitamin D-coupled transcription regulation via its association with the WINAC complex, a chromatin-remodeling complex recruited by vitamin D receptor (VDR), which is requir…
NCL	NUCL_HUMAN	10	ADAP1|CSNK2A2|HIST1H1C|MDM2|MYBL1|NPM1|S100A11|TERT|TOP1|TP53	0.502	Nucleolin is the major nucleolar protein of growing eukaryotic cells. It is found associated with intranucleolar chromatin and pre-ribosomal particles. It induces chromatin decondensation by binding to histone H1. It is thought to play a role in pre-rRNA transcription and ribosome assembly. May play a role in the process of transcriptional elongation. Binds RNA oligonucleotides with 5'-UUAGGG-3' …
PPP1R9B	NEB2_HUMAN	6	CDKN2A|DRD2|PPP1CA|PPP1CB|PPP1CC|TIAM1	0.502	Seems to act as a scaffold protein in multiple signaling pathways. Modulates excitatory synaptic transmission and dendritic spine morphology. Binds to actin filaments (F-actin) and shows cross-linking activity. Binds along the sides of the F-actin. May play an important role in linking the actin cytoskeleton to the plasma membrane at the synaptic junction. Believed to target protein phosphatase 1…
RHOQ	RHOQ_HUMAN	7	CDC42EP2|CDC42EP3|EXOC7|GOPC|PARD6B|TRIP10|WASL	0.502	Plasma membrane-associated small GTPase which cycles between an active GTP-bound and an inactive GDP-bound state. In active state binds to a variety of effector proteins to regulate cellular responses. Involved in epithelial cell polarization processes. May play a role in CFTR trafficking to the plasma membrane. Causes the formation of thin, actin-rich surface projections called filopodia.
MAPK7	MK07_HUMAN	8	GJA1|MAP2K5|MEF2C|MEF2D|PTPRR|RAF1|SGK1|YWHAB	0.502	Plays a role in various cellular processes such as proliferation, differentiation and cell survival. The upstream activator of MAPK7 is the MAPK kinase MAP2K5. Upon activation, it translocates to the nucleus and phosphorylates various downstream targets including MEF2C. EGF activates MAPK7 through a Ras- independent and MAP2K5-dependent pathway. May have a role in muscle cell differentiation. May…
SMAD4	SMAD4_HUMAN	20	AR|ATF2|BTRC|CEBPD|COPS5|DAXX|DCP1A|FOXH1|NF1|NKX3-2|PIAS3|PIAS4|SKI|SKP2|SMAD2|SMAD3|SMAD7|SMAD9|TGFBRAP1|YY1	0.502	Common SMAD (co-SMAD) is the coactivator and mediator of signal transduction by TGF-beta (transforming growth factor). Component of the heterotrimeric SMAD2/SMAD3-SMAD4 complex that forms in the nucleus and is required for the TGF-mediated signaling. Promotes binding of the SMAD2/SMAD4/FAST-1 complex to DNA and provides an activation function required for SMAD1 or SMAD2 to stimulate transcription…
TOP2B	TOP2B_HUMAN	6	CD3E|HDAC1|HDAC2|RARA|SUMO1|TP53	0.5	Control of topological states of DNA by transient breakage and subsequent rejoining of DNA strands. Topoisomerase II makes double-strand breaks. Indirectly involved in vitamin D- coupled transcription regulation via its association with the WINAC complex, a chromatin-remodeling complex recruited by vitamin D receptor (VDR), which is required for the ligand-bound VDR- mediated transrepression of t…
RFC1	RFC1_HUMAN	5	BRD4|HDAC1|PCNA|RELA|RFC3	0.498	The elongation of primed DNA templates by DNA polymerase delta and epsilon requires the action of the accessory proteins PCNA and activator 1. This subunit binds to the primer-template junction. Binds the PO-B transcription element as well as other GA rich DNA sequences. Could play a role in DNA transcription regulation as well as DNA replication and/or repair. Can bind single- or double-stranded…
NR0B2	NR0B2_HUMAN	16	AR|EID1|ESR1|HDAC1|HNF4A|NR1H3|NR5A2|ONECUT1|PPARG|RARA|RXRA|RXRG|SIN3A|SIRT1|SMARCA2|THRA	0.498	Acts as a transcriptional regulator. Acts as a negative regulator of receptor-dependent signaling pathways. Specifically inhibits transactivation of the nuclear receptor with whom it interacts. Inhibits transcriptional activity of NEUROD1 on E-box- containing promoter by interfering with the coactivation function of the p300/CBP-mediated trancription complex for NEUROD1.
ATXN1	ATX1_HUMAN	6	ATXN1L|COIL|GAPDH|STUB1|UBE2E1|USP7	0.498	Chromatin-binding factor that repress Notch signaling in the absence of Notch intracellular domain by acting as a CBF1 corepressor. Binds to the HEY promoter and might assist, along with NCOR2, RBPJ-mediated repression. Binds RNA in vitro. May be involved in RNA metabolism. The expansion of the polyglutamine tract may alter this function.
BIRC2	BIRC2_HUMAN	13	CASP9|DIABLO|GSPT1|HSP90B1|HTRA2|RIPK1|RIPK2|TRAF1|TRAF2|UBC|UBE2D1|UBE2D3|UBE2J1	0.498	Multi-functional protein which regulates not only caspases and apoptosis, but also modulates inflammatory signaling and immunity, mitogenic kinase signaling, and cell proliferation, as well as cell invasion and metastasis. Acts as an E3 ubiquitin- protein ligase regulating NF-kappa-B signaling and regulates both canonical and non-canonical NF-kappa-B signaling by acting in opposite directions: ac…
MAPK8IP2	JIP2_HUMAN	8	LRP1|LRP2|MAP2K7|MAP3K10|MAP3K11|MAP3K12|MAPK8IP1|MAPK9	0.498	The JNK-interacting protein (JIP) group of scaffold proteins selectively mediates JNK signaling by aggregating specific components of the MAPK cascade to form a functional JNK signaling module. JIP2 inhibits IL1 beta-induced apoptosis in insulin-secreting cells. May function as a regulator of vesicle transport, through interactions with the JNK-signaling components and motor proteins (By similari…
SMAD3	SMAD3_HUMAN	47	ANAPC10|AR|ATF2|ATF3|BRCA1|BRCA2|CEBPD|CITED2|CSNK1G2|CTCF|DAB2|DVL1|E2F4|EID2|EP300|ERBB2IP|FOS|GSK3B|HDAC1|HDAC4|HDAC5|JUN|JUNB|KAT2B|KPNB1|LEF1|MECOM|MYC|MYOCD|NEDD9|NOTCH1|NR3C1|PARD3B|PIAS3|PIAS4|PIN1|RBL1|RBX1|RUNX2|SKI|SKIL|SMAD4|SMURF2|SNW1|TGIF1|VDR|ZFYVE9	0.496	Receptor-regulated SMAD (R-SMAD) that is an intracellular signal transducer and transcriptional modulator activated by TGF-beta (transforming growth factor) and activin type 1 receptor kinases. Binds the TRE element in the promoter region of many genes that are regulated by TGF-beta and, on formation of the SMAD3/SMAD4 complex, activates transcription. Also can form a SMAD3/SMAD4/JUN/FOS complex …
SORBS1	SRBS1_HUMAN	5	FLOT1|INPPL1|INSM1|MLLT4|VCL	0.496	Plays a role in tyrosine phosphorylation of CBL by linking CBL to the insulin receptor. Required for insulin- stimulated glucose transport. Involved in formation of actin stress fibers and focal adhesions (By similarity).
IKBKB	IKKB_HUMAN	22	CHUK|COPS3|COPS4|COPS5|COPS7A|CTNNB1|CUEDC2|FANCA|IKBKG|KEAP1|MAP3K14|NCOA3|NFKB1|NFKBIA|NFKBIB|PEBP1|PPM1B|PRKCA|PRKCD|PRKCI|TNFRSF1A|TRAF2	0.496	Serine kinase that plays an essential role in the NF- kappa-B signaling pathway which is activated by multiple stimuli such as inflammatory cytokines, bacterial or viral products, DNA damages or other cellular stresses. Acts as part of the canonical IKK complex in the conventional pathway of NF-kappa-B activation and phosphorylates inhibitors of NF-kappa-B on 2 critical serine residues. These mod…
CHEK1	CHK1_HUMAN	8	ATM|CDC25A|CDC25B|CDC25C|CLSPN|CSNK2A1|PRKDC|TP53	0.496	Serine/threonine-protein kinase which is required for checkpoint-mediated cell cycle arrest and activation of DNA repair in response to the presence of DNA damage or unreplicated DNA. May also negatively regulate cell cycle progression during unperturbed cell cycles. This regulation is achieved by a number of mechanisms that together help to preserve the integrity of the genome. Recognizes the su…
DNMT3B	DNM3B_HUMAN	16	CBX3|CBX5|DNMT1|DNMT3A|DNMT3L|EZH2|HDAC1|HDAC2|HELLS|NCAPG|NEDD8|SMARCA5|SPI1|SUMO1|TDG|UBE2I	0.496	Required for genome-wide de novo methylation and is essential for the establishment of DNA methylation patterns during development. DNA methylation is coordinated with methylation of histones. May preferentially methylates nucleosomal DNA within the nucleosome core region. May function as transcriptional co- repressor by associating with CBX4 and independently of DNA methylation. Seems to be invo…
WRN	WRN_HUMAN	14	ATR|BLM|CHAF1A|FEN1|H2AFX|PCNA|PRKDC|RAD51|RAD52|TERF2|TP53|WRNIP1|XRCC5|XRCC6	0.496	Multifunctional enzyme that has both magnesium and ATP- dependent DNA-helicase activity and 3'->5' exonuclease activity towards double-stranded DNA with a 5'-overhang. Has no nuclease activity towards single-stranded DNA or blunt-ended double- stranded DNA. Binds preferentially to DNA substrates containing alternate secondary structures, such as replication forks and Holliday junctions. May play …
UHRF1	UHRF1_HUMAN	5	DNMT1|DNMT3A|HIST1H3A|HIST2H2BE|USP7	0.496	Putative E3 ubiquitin-protein ligase. May participate in methylation-dependent transcriptional regulation. Binds to inverted 5'-CCAAT-3' box 2 in the TOP2A promoter, and activates TOP2A expression. Important for G1/S transition. May be involved in DNA repair and chromosomal stability.
MCL1	MCL1_HUMAN	12	BAD|BAK1|BBC3|BCL2L11|BID|BIK|DAD1|HUWE1|PCNA|PIN1|PMAIP1|TNKS	0.496	Involved in the regulation of apoptosis versus cell survival, and in the maintenance of viability but not of proliferation. Mediates its effects by interactions with a number of other regulators of apoptosis. Isoform 1 inhibits apoptosis. Isoform 2 promotes apoptosis.
PSTPIP1	PPIP1_HUMAN	5	ABL1|CD2|PTPN12|PTPN18|WAS	0.492	Involved in regulation of the actin cytoskeleton. May regulate the WAS actin-bundling activity. Bridges the interaction between ABL1 and PTPN18 leading to the ABL1 dephosphorylation. May play a role as a scaffold protein between PTPN12 and WAS and allows PTPN12 to dephosphorylate WAS. Has the potential to physically couple CD2 and CD2AP to WAS. Acts downstream of CD2 and CD2AP to recruit WAS to t…
PTPN12	PTN12_HUMAN	6	BCAR1|GRB2|PSTPIP1|PXN|SHC1|TGFB1I1	0.492	Dephosphorylates cellular tyrosine kinases, including PTK2B/PYK2, and thereby regulates signaling via PTK2B/PYK2.
SETDB1	SETB1_HUMAN	7	AKT1|ATF7IP|ATF7IP2|HIST1H3A|MBD1|TAT|TRIM28	0.492	Histone methyltransferase that specifically trimethylates 'Lys-9' of histone H3. H3 'Lys-9' trimethylation represents a specific tag for epigenetic transcriptional repression by recruiting HP1 (CBX1, CBX3 and/or CBX5) proteins to methylated histones. Mainly functions in euchromatin regions, thereby playing a central role in the silencing of euchromatic genes. H3 'Lys-9' trimethylation is coordina…
CHAF1A	CAF1A_HUMAN	20	ANP32A|ANP32B|ASF1A|ASF1B|BLM|CBX5|CDC7|CDK2|DDX41|HMGB2|MBD1|PCNA|SET|SUMO2|SUMO3|WRN|XRCC5|XRCC6|YWHAB|YWHAZ	0.49	Core component of the CAF-1 complex, a complex thought to mediate chromatin assembly in DNA replication and DNA repair. Assembles histone octamers onto replicating DNA in vitro. CAF-1 performs the first step of the nucleosome assembly process, bringing newly synthesized histones H3 and H4 to replicating DNA; histones H2A/H2B can bind to this chromatin precursor subsequent to DNA replication to co…
DVL1	DVL1_HUMAN	5	AXIN1|DVL3|EPS8|HECW1|SMAD3	0.49	Participates in Wnt signaling by binding to the cytoplasmic C-terminus of frizzled family members and transducing the Wnt signal to down-stream effectors. Plays a role both in canonical and non-canonical Wnt signaling. Plays a role in the signal transduction pathways mediated by multiple Wnt genes. Required for LEF1 activation upon WNT1 and WNT3A signaling. DVL1 and PAK1 form a ternary complex wi…
FANCE	FANCE_HUMAN	5	FANCA|FANCC|FANCD2|FANCF|FANCG	0.49	As part of the Fanconi anemia (FA) complex functions in DNA cross-links repair. Required for the nuclear accumulation of FANCC and provides a critical bridge between the FA complex and FANCD2.
UBE2D2	UB2D2_HUMAN	11	AMFR|BIRC3|DTX3L|DZIP3|NEDD4|PJA1|PJA2|RNF11|RNF2|TRIM5|UBE3A	0.49	Accepts ubiquitin from the E1 complex and catalyzes its covalent attachment to other proteins. In vitro catalyzes 'Lys- 48'-linked polyubiquitination. Mediates the selective degradation of short-lived and abnormal proteins. Functions in the E6/E6-AP- induced ubiquitination of p53/TP53. Mediates ubiquitination of PEX5 and autoubiquitination of STUB1 and TRAF6. Involved in the signal-induced conjug…
STAT1	STAT1_HUMAN	15	BRCA1|CREBBP|EIF2AK2|FANCC|GNB2L1|IL27RA|IRF1|IRF9|KIT|MCM5|PIAS1|PTK2|STAT2|TRADD|VDR	0.49	Signal transducer and transcription activator that mediates cellular responses to interferons (IFNs), cytokine KITLG/SCF and other cytokines and growth factors. Following type I IFN (IFN-alpha and IFN-beta) binding to cell surface receptors, signaling via protein kinases leads to activation of Jak kinases (TYK2 and JAK1) and to tyrosine phosphorylation of STAT1 and STAT2. The phosphorylated STATs…
IL6ST	IL6RB_HUMAN	6	CNTFR|GRB2|JAK1|SHC1|SOCS3|TLE1	0.488	Signal-transducing molecule. The receptor systems for IL6, LIF, OSM, CNTF, IL11, CTF1 and BSF3 can utilize gp130 for initiating signal transmission. Binds to IL6/IL6R (alpha chain) complex, resulting in the formation of high-affinity IL6 binding sites, and transduces the signal. Does not bind IL6. May have a role in embryonic development (By similarity). The type I OSM receptor is capable of tran…
POLR2A	RPB1_HUMAN	27	BRCA1|CDK7|CDK9|CTCF|CTDP1|GTF2B|GTF2F1|ITCH|MEN1|MLL|MYC|NEDD4|PAF1|PCIF1|PPIG|PQBP1|SETD2|SND1|SUPT6H|TAT|TCEA1|TCERG1|UBC|VHL|WAC|WWP2|ZNF74	0.488	DNA-dependent RNA polymerase catalyzes the transcription of DNA into RNA using the four ribonucleoside triphosphates as substrates. Largest and catalytic component of RNA polymerase II which synthesizes mRNA precursors and many functional non-coding RNAs. Forms the polymerase active center together with the second largest subunit. Pol II is the central component of the basal RNA polymerase II tra…
GRB7	GRB7_HUMAN	6	EPHB1|INSR|LY6G6F|PTK2|RET|RND1	0.486	Adapter protein that interacts with the cytoplasmic domain of numerous receptor kinases and modulates down-stream signaling. Promotes activation of down-stream protein kinases, including STAT3, AKT1, MAPK1 and/or MAPK3. Promotes activation of HRAS. Plays a role in signal transduction in response to EGF. Plays a role in the regulation of cell proliferation and cell migration. Plays a role in the a…
DNM1	DYN1_HUMAN	5	AMPH|DNMBP|GRB2|NCK1|PACSIN1	0.486	Microtubule-associated force-producing protein involved in producing microtubule bundles and able to bind and hydrolyze GTP. Most probably involved in vesicular trafficking processes. Involved in receptor-mediated endocytosis.
CFLAR	CFLAR_HUMAN	6	CASP10|CASP3|CASP8|DEDD|DEDD2|FADD	0.486	Apoptosis regulator protein which may function as a crucial link between cell survival and cell death pathways in mammalian cells. Acts as an inhibitor of TNFRSF6 mediated apoptosis. A proteolytic fragment (p43) is likely retained in the death-inducing signaling complex (DISC) thereby blocking further recruitment and processing of caspase-8 at the complex. Full length and shorter isoforms have be…
SOS1	SOS1_HUMAN	7	ABI1|CRK|EGFR|GRB2|ITSN1|NCK1|PLCG1	0.484	Promotes the exchange of Ras-bound GDP by GTP.
TAF6	TAF6_HUMAN	6	TAF1|TAF5|TAF8|TAF9|TBP|TP53	0.484	TAFs are components of the transcription factor IID (TFIID) complex, PCAF histone acetylase complex and TBP-free TAFII complex (TFTC). TIIFD is multimeric protein complex that plays a central role in mediating promoter responses to various activators and repressors.
LRRC7	LRRC7_HUMAN	5	ACTN4|CAMK2A|CDH2|CNKSR2|CTNND2	0.484	Required for normal synaptic spine architecture and function. Necessary for DISC1 and GRM5 localization to postsynaptic density complexes and for both N-methyl D-aspartate receptor-dependent and metabotropic glutamate receptor-dependent long term depression.
LMO2	RBTN2_HUMAN	5	GATA1|GATA2|KDM5A|MLLT4|TAL1	0.484	Acts with TAL1/SCL to regulate red blood cell development. Also acts with LDB1 to maintain erythroid precursors in an immature state.
MNAT1	MAT1_HUMAN	6	DMAP1|ESR1|MCM7|MTA1|POU2F1|TP53	0.482	Stabilizes the cyclin H-CDK7 complex to form a functional CDK-activating kinase (CAK) enzymatic complex. CAK activates the cyclin-associated kinases CDK1, CDK2, CDK4 and CDK6 by threonine phosphorylation. CAK complexed to the core-TFIIH basal transcription factor activates RNA polymerase II by serine phosphorylation of the repetitive C-terminus domain (CTD) of its large subunit (POLR2A), allowing…
SRSF1	SRSF1_HUMAN	8	PSIP1|SAFB|SKY1|SNRNP70|SRPK1|SRPK2|TOP1|U2AF1	0.482	Plays a role in preventing exon skipping, ensuring the accuracy of splicing and regulating alternative splicing. Interacts with other spliceosomal components, via the RS domains, to form a bridge between the 5'- and 3'-splice site binding components, U1 snRNP and U2AF. Can stimulate binding of U1 snRNP to a 5'-splice site-containing pre-mRNA. Binds to purine-rich RNA sequences, either the octamer…
NCK1	NCK1_HUMAN	25	ABL1|ARHGAP32|DAG1|DNM1|EGFR|EIF2B2|EPHB1|KHDRBS1|LCP2|MAP4K1|MAP4K4|MINK1|NCKIPSD|NEDD9|PAK1|PKN2|PTK2|RASA1|RRAS|SOCS7|SOS1|TBK1|WAS|WASL|WIPF1	0.482	Adapter protein which associates with tyrosine- phosphorylated growth factor receptors, such as KDR and PDGFRB, or their cellular substrates. Maintains low levels of EIF2S1 phosphorylation by promoting its dephosphorylation by PP1. Plays a role in the DNA damage response, not in the detection of the damage by ATM/ATR, but for efficient activation of downstream effectors, such as that of CHEK2. Pl…
LMNA	LMNA_HUMAN	8	ALOX12|EMD|NARF|RBBP4|SREBF1|SYNE1|TMPO|ZNF239	0.482	Lamins are components of the nuclear lamina, a fibrous layer on the nucleoplasmic side of the inner nuclear membrane, which is thought to provide a framework for the nuclear envelope and may also interact with chromatin. Lamin A and C are present in equal amounts in the lamina of mammals. Plays an important role in nuclear assembly, chromatin organization, nuclear membrane and telomere dynamics.
NME1	NDKA_HUMAN	7	AURKA|ITGB1|NME3|PRUNE|RORA|RORB|TERF1	0.482	Major role in the synthesis of nucleoside triphosphates other than ATP. Possesses nucleoside-diphosphate kinase, serine/threonine-specific protein kinase, geranyl and farnesyl pyrophosphate kinase, histidine protein kinase and 3'-5' exonuclease activities. Involved in cell proliferation, differentiation and development, signal transduction, G protein- coupled receptor endocytosis, and gene expres…
MEN1	MEN1_HUMAN	18	ASH2L|CTNNB1|ESR1|FANCD2|FOXN3|GFAP|JUND|MLL|MYC|NFKB1|POLR2A|RELA|RPA2|SIN3A|SNW1|TCF3|TCF4|VIM	0.48	Essential component of a MLL/SET1 histone methyltransferase (HMT) complex, a complex that specifically methylates 'Lys-4' of histone H3 (H3K4). Functions as a transcriptional regulator. Binds to the TERT promoter and represses telomerase expression. Plays a role in TGFB1-mediated inhibition of cell-proliferation, possibly regulating SMAD3 transcriptional activity. Represses JUND-mediated transcri…
MED17	MED17_HUMAN	5	MED18|MED19|MED28|MED29|PPARGC1A	0.48	Component of the Mediator complex, a coactivator involved in the regulated transcription of nearly all RNA polymerase II-dependent genes. Mediator functions as a bridge to convey information from gene-specific regulatory proteins to the basal RNA polymerase II transcription machinery. Mediator is recruited to promoters by direct interactions with regulatory proteins and serves as a scaffold for t…
RALBP1	RBP1_HUMAN	5	CCNB1|HSF1|RALA|REPS1|REPS2	0.48	Can activate specifically hydrolysis of GTP bound to RAC1 and CDC42, but not RALA. Mediates ATP-dependent transport of S-(2,4-dinitrophenyl)-glutathione (DNP-SG) and doxorubicin (DOX) and is the major ATP-dependent transporter of glutathione conjugates of electrophiles (GS-E) and DOX in erythrocytes. Can catalyze transport of glutathione conjugates and xenobiotics, and may contribute to the multi…
CCNA1	CCNA1_HUMAN	12	CDC20|CDK1|CDK2|E2F1|GNB2L1|GPS2|INCA1|MYBL2|PROCA1|RB1|SIC1|SKP2	0.478	May be involved in the control of the cell cycle at the G1/S (start) and G2/M (mitosis) transitions. May primarily function in the control of the germline meiotic cell cycle and additionally in the control of mitotic cell cycle in some somatic cells.
RCOR1	RCOR1_HUMAN	10	CTBP1|HDAC1|HIST1H3A|HSPA4|KDM1A|REST|SMARCE1|SUB1|SUMO2|ZMYM2	0.478	Essential component of the BHC complex, a corepressor complex that represses transcription of neuron-specific genes in non-neuronal cells. The BHC complex is recruited at RE1/NRSE sites by REST and acts by deacetylating and demethylating specific sites on histones, thereby acting as a chromatin modifier. In the BHC complex, it serves as a molecular beacon for the recruitment of molecular machiner…
GADD45GIP1	G45IP_HUMAN	5	AR|GADD45A|GADD45B|GADD45G|NR4A1	0.478	Acts as a negative regulator of G1 to S cell cycle phase progression by inhibiting cyclin-dependent kinases. Inhibitory effects are additive with GADD45 proteins but occurs also in the absence of GADD45 proteins. Acts as a repressor of the orphan nuclear receptor NR4A1 by inhibiting AB domain-mediated transcriptional activity. May be involved in the hormone-mediated regulation of NR4A1 transcript…
PRKCB	KPCB_HUMAN	5	ADRBK1|GNB2L1|HSPA4|PDLIM5|RIPK4	0.476	Calcium-activated, phospholipid- and diacylglycerol (DAG)-dependent serine/threonine-protein kinase involved in various cellular processes such as regulation of the B-cell receptor (BCR) signalosome, oxidative stress-induced apoptosis, androgen receptor-dependent transcription regulation, insulin signaling and endothelial cells proliferation. Plays a key role in B-cell activation by regulating BC…
TRIM28	TIF1B_HUMAN	19	CBX1|CBX3|CBX5|CDCA4|CEBPB|HDAC10|MYB|NR3C1|NR4A1|PAX3|PFDN5|PPP1CA|PPP1CB|SERTAD1|SERTAD2|SETDB1|ZNF10|ZNF197|ZNF274	0.476	Nuclear corepressor for KRAB domain-containing zinc finger proteins (KRAB-ZFPs). Mediates gene silencing by recruiting CHD3, a subunit of the nucleosome remodeling and deacetylation (NuRD) complex, and SETDB1 (which specifically methylates histone H3 at 'Lys-9' (H3K9me)) to the promoter regions of KRAB target genes. Enhances transcriptional repression by coordinating the increase in H3K9me, the d…
DCTN1	DCTN1_HUMAN	7	BBS4|DST|FBXL5|GRB2|HAP1|KIF11|RAB6A	0.476	Required for the cytoplasmic dynein-driven retrograde movement of vesicles and organelles along microtubules. Dynein- dynactin interaction is a key component of the mechanism of axonal transport of vesicles and organelles.
BCAR1	BCAR1_HUMAN	18	ABL1|ARHGAP32|CRK|CRKL|DOCK1|FES|FYN|GRB2|INPPL1|NPHP1|PIK3R1|PTK2|PTPN1|PTPN12|RAPGEF1|SRC|SRCIN1|YWHAZ	0.476	Docking protein which plays a central coordinating role for tyrosine kinase-based signaling related to cell adhesion. Implicated in induction of cell migration. Overexpression confers antiestrogen resistance on breast cancer cells.
HIST1H4A	H4_HUMAN	6	ASF1A|BAZ2A|EP300|ERCC6|NCOR2|SETD8	0.476	Core component of nucleosome. Nucleosomes wrap and compact DNA into chromatin, limiting DNA accessibility to the cellular machineries which require DNA as a template. Histones thereby play a central role in transcription regulation, DNA repair, DNA replication and chromosomal stability. DNA accessibility is regulated via a complex set of post-translational modifications of histones, also called h…
CALM1	CALM_HUMAN	7	AKAP9|AR|H2AFX|PPEF1|PPEF2|SNCA|TRPV1	0.476	Calmodulin mediates the control of a large number of enzymes, ion channels and other proteins by Ca(2+). Among the enzymes to be stimulated by the calmodulin-Ca(2+) complex are a number of protein kinases and phosphatases. Together with CEP110 and centrin, is involved in a genetic pathway that regulates the centrosome cycle and progression through cytokinesis.
RAN	RAN_HUMAN	12	DIS3|KPNB1|NEK9|NUTF2|RANBP1|RANBP10|RANGAP1|RANGRF|RCC1|VRK2|XPO1|XPO5	0.476	GTP-binding protein involved in nucleocytoplasmic transport. Required for the import of protein into the nucleus and also for RNA export. Involved in chromatin condensation and control of cell cycle (By similarity). The complex with BIRC5/ survivin plays a role in mitotic spindle formation by serving as a physical scaffold to help deliver the RAN effector molecule TPX2 to microtubules. Acts as a …
YEATS4	YETS4_HUMAN	5	MLLT10|NUMA1|SMARCB1|TACC1|TACC2	0.474	Component of the NuA4 histone acetyltransferase (HAT) complex which is involved in transcriptional activation of select genes principally by acetylation of nucleosomal histones H4 and H2A. This modification may both alter nucleosome - DNA interactions and promote interaction of the modified histones with other proteins which positively regulate transcription. This complex may be required for the …
XPA	XPA_HUMAN	6	ERCC1|ERCC6|RPA1|RPA2|RPA4|XAB2	0.474	Involved in DNA excision repair. Initiates repair by binding to damaged sites with various affinities, depending on the photoproduct and the transcriptional state of the region. Required for UV-induced CHEK1 phosphorylation and the recruitment of CEP164 to cyclobutane pyrimidine dimmers (CPD), sites of DNA damage after UV irradiation.
MAPK8	MK08_HUMAN	22	ATF2|CEBPA|CRK|DUSP1|DUSP10|DUSP22|GSTP1|H2AFX|HDAC9|IKBKAP|IRS1|JUN|JUND|MAP2K4|MAP2K7|MAP3K1|MAPK8IP3|MYC|REL|SH3BP5|SIRT1|TP53	0.474	Serine/threonine-protein kinase involved in various processes such as cell proliferation, differentiation, migration, transformation and programmed cell death. Extracellular stimuli such as proinflammatory cytokines or physical stress stimulate the stress-activated protein kinase/c-Jun N-terminal kinase (SAP/JNK) signaling pathway. In this cascade, two dual specificity kinases MAP2K4/MKK4 and MAP…
APBB1	APBB1_HUMAN	8	APLP1|APLP2|APP|CPSF6|EVL|LRP1|TFCP2|TSHZ3	0.474	Transcription coregulator that can have both coactivator and corepressor functions. Adapter protein that forms a transcriptionally active complex with the gamma-secretase-derived amyloid precursor protein (APP) intracellular domain. Plays a central role in the response to DNA damage by translocating to the nucleus and inducing apoptosis. May act by specifically recognizing and binding histone H2A…
CASP8	CASP8_HUMAN	8	BCAP31|CASP10|CFLAR|DEDD|DEDD2|FADD|PEA15|TRAF1	0.474	Most upstream protease of the activation cascade of caspases responsible for the TNFRSF6/FAS mediated and TNFRSF1A induced cell death. Binding to the adapter molecule FADD recruits it to either receptor. The resulting aggregate called death- inducing signaling complex (DISC) performs CASP8 proteolytic activation. The active dimeric enzyme is then liberated from the DISC and free to activate downs…
SYNJ2BP	SYJ2B_HUMAN	5	ACVR2A|ACVR2B|LRP1|LRP2|SYNJ2	0.474	-
PEX19	PEX19_HUMAN	6	ABCD1|ABCD2|ABCD3|PEX12|PEX13|PEX3	0.474	Necessary for early peroxisomal biogenesis. Acts both as a cytosolic chaperone and as an import receptor for peroxisomal membrane proteins (PMPs). Binds and stabilizes newly synthesized PMPs in the cytoplasm by interacting with their hydrophobic membrane-spanning domains, and targets them to the peroxisome membrane by binding to the integral membrane protein PEX3. Excludes CDKN2A from the nucleus…
ANP32A	AN32A_HUMAN	5	CHAF1A|HIST1H3A|MAP1B|SET|TAF1A	0.474	Implicated in a number of cellular processes, including proliferation, differentiation, caspase-dependent and caspase- independent apoptosis, suppression of transformation (tumor suppressor), inhibition of protein phosphatase 2A, regulation of mRNA trafficking and stability in association with ELAVL1, and inhibition of acetyltransferases as part of the INHAT (inhibitor of histone acetyltransferas…
VDR	VDR_HUMAN	22	BAZ1B|COPS2|FOXO3|MED1|MED12|MED14|NCOA2|NCOA3|NCOA4|NCOR1|NCOR2|RUNX1|RUNX1T1|RXRA|SIRT1|SMAD3|SNW1|SRC|STAT1|TAF11|TCF3|ZBTB16	0.472	Nuclear hormone receptor. Transcription factor that mediates the action of vitamin D3 by controlling the expression of hormone sensitive genes. Regulates transcription of hormone sensitive genes via its association with the WINAC complex, a chromatin-remodeling complex. Recruited to promoters via its interaction with the WINAC complex subunit BAZ1B/WSTF, which mediates the interaction with acetyl…
TACC1	TACC1_HUMAN	5	CKAP5|LSM7|SNRPG|TDRD7|YEATS4	0.472	Likely involved in the processes that promote cell division prior to the formation of differentiated tissues.
DDX17	DDX17_HUMAN	6	CREBBP|EP300|ESR1|NCOA1|NCOA2|NCOA3	0.472	RNA-dependent ATPase activity. Involved in transcriptional regulation. Transcriptional coactivator for estrogen receptor ESR1. Increases ESR1 AF-1 domain-mediated transactivation. Synergizes with DDX5 and SRA1 RNA to activate MYOD1 transcriptional activity and probably involved in skeletal muscle differentiation. Required for zinc-finger antiviral protein ZC3HAV1-mediated mRNA degradation.
ASF1A	ASF1A_HUMAN	8	CHAF1A|CHAF1B|HIRA|HIST1H3A|HIST1H4A|HIST3H3|TLK1|TLK2	0.472	Histone chaperone that facilitates histone deposition and histone exchange and removal during nucleosome assembly and disassembly. Cooperates with chromatin assembly factor 1 (CAF-1) to promote replication-dependent chromatin assembly and with HIRA to promote replication-independent chromatin assembly. Required for the formation of senescence-associated heterochromatin foci (SAHF) and efficient s…
MAP3K1	M3K1_HUMAN	5	DTX1|GRB2|MAPK8|RAF1|UBE2I	0.472	Component of a protein kinase signal transduction cascade. Activates the ERK and JNK kinase pathways by phosphorylation of MAP2K1 and MAP2K4. Activates CHUK and IKBKB, the central protein kinases of the NF-kappa-B pathway.
CDK7	CDK7_HUMAN	5	AR|CCNH|POLR2A|SUPT5H|TP53	0.47	Serine/threonine kinase involved in cell cycle control and in RNA polymerase II-mediated RNA transcription. Cyclin- dependent kinases (CDKs) are activated by the binding to a cyclin and mediate the progression through the cell cycle. Each different complex controls a specific transition between 2 subsequent phases in the cell cycle. Required for both activation and complex formation of CDK1/cycli…
SH2B1	SH2B1_HUMAN	5	FGFR3|GRB2|INSR|JAK2|NTRK1	0.47	Adapter protein for several members of the tyrosine kinase receptor family. Involved in multiple signaling pathways mediated by Janus kinase (JAK) and receptor tyrosine kinases, including the receptors of insulin (INS), insulin-like growth factor I (IGF1), nerve growth factor (NGF), brain-derived neurotrophic factor (BDNF), glial cell line-derived neurotrophic factor (GDNF), platelet-derived grow…
PIK3R1	P85A_HUMAN	27	ADAM12|AGAP2|BCAR1|CD28|CD7|CTNNB1|EPHA2|EPOR|EZR|FCGR2A|GAB1|GAB2|GRB2|HRAS|IRS1|IRS2|KHDRBS1|KIT|LAT|LCP2|PIK3CD|PTK2|SHB|TUBA1B|TYRO3|VAV1|WAS	0.47	Binds to activated (phosphorylated) protein-Tyr kinases, through its SH2 domain, and acts as an adapter, mediating the association of the p110 catalytic unit to the plasma membrane. Necessary for the insulin-stimulated increase in glucose uptake and glycogen synthesis in insulin-sensitive tissues. Plays an important role in signaling in response to FGFR1, FGFR2, FGFR3, FGFR4, KITLG/SCF, KIT, PDGF…
MTA1	MTA1_HUMAN	12	BCL11B|CSNK1G2|ESR1|HDAC1|HDAC2|HIF1A|HSF1|ITGB3BP|LMO4|MNAT1|PARK7|TP53	0.468	May be involved in the regulation of gene expression by covalent modification of histone proteins. Isoform Long is a corepressor of estrogen receptor (ER). Isoform Short binds to ER and sequesters it in the cytoplasm and enhances non-genomic responses of ER.
SNCA	SYUA_HUMAN	8	CALM1|CDC42EP2|HSPA1A|PLD1|SLC6A3|SNCAIP|UBC|VDAC1	0.468	May be involved in the regulation of dopamine release and transport. Induces fibrillization of microtubule-associated protein tau. Reduces neuronal responsiveness to various apoptotic stimuli, leading to a decreased caspase-3 activation.
CTCF	CTCF_HUMAN	5	CHD8|POLR2A|SMAD3|SUZ12|YBX1	0.468	Chromatin binding factor that binds to DNA sequence specific sites. Involved in transcriptional regulation by binding to chromatin insulators and preventing interaction between promoter and nearby enhancers and silencers. Acts as transcriptional repressor binding to promoters of vertebrate MYC gene and BAG1 gene. Also binds to the PLK and PIM1 promoters. Acts as a transcriptional activator of APP…
NDN	NECD_HUMAN	6	E2F1|E2F4|IL1A|NGFR|NUCB2|TP53	0.468	Growth suppressor that facilitates the entry of the cell into cell cycle arrest. Functionally similar to the retinoblastoma protein it binds to and represses the activity of cell-cycle- promoting proteins such as SV40 large T antigen, adenovirus E1A, and the transcription factor E2F. Necdin also interacts with p53 and works in an additive manner to inhibit cell growth. Functions also as transcrip…
CDC27	CDC27_HUMAN	8	CCNB1|CDC16|CDC20|CDH1|MDC1|PIN1|PPP5C|PTTG1	0.466	Component of the anaphase promoting complex/cyclosome (APC/C), a cell cycle-regulated E3 ubiquitin ligase that controls progression through mitosis and the G1 phase of the cell cycle. The APC/C complex acts by mediating ubiquitination and subsequent degradation of target proteins: it mainly mediates the formation of 'Lys-11'-linked polyubiquitin chains and, to a lower extent, the formation of 'Ly…
GADD45A	GA45A_HUMAN	6	CDK1|CDKN1A|GADD45GIP1|MAP3K4|MAPK14|PCNA	0.466	In T-cells, functions as a regulator of p38 MAPKs by inhibiting p88 phosphorylation and activity (By similarity). Might affect PCNA interaction with some CDK (cell division protein kinase) complexes; stimulates DNA excision repair in vitro and inhibits entry of cells into S phase.
HIST1H1C	H12_HUMAN	12	ASXL1|CTNNB1|KPNA7|KPNB1|NCL|PARP1|PRKDC|PUF60|RBM39|WDR12|WDR5|YBX1	0.466	Histone H1 protein binds to linker DNA between nucleosomes forming the macromolecular structure known as the chromatin fiber. Histones H1 are necessary for the condensation of nucleosome chains into higher order structured fibers. Acts also as a regulator of individual gene transcription through chromatin remodeling, nucleosome spacing and DNA methylation (By similarity).
DOK1	DOK1_HUMAN	7	ABL1|INPP5D|KIT|LYN|RET|SH2D1A|TEC	0.464	DOK proteins are enzymatically inert adaptor or scaffolding proteins. They provide a docking platform for the assembly of multimolecular signaling complexes. DOK1 appears to be a negative regulator of the insulin signaling pathway. Modulates integrin activation by competing with talin for the same binding site on ITGB3.
SMARCA4	SMCA4_HUMAN	32	AR|ARID1B|BRCA1|CARM1|CBX5|CDKN2A|CEBPA|CHD4|CTNNB1|DPF2|ESR1|FANCA|GMNN|H2AFX|HIC1|HSF4|MKL1|MYC|MYOCD|NONO|NR3C1|NR4A2|PRMT5|RB1|SIN3A|SP1|SS18L1|STAT2|STAT3|STK11|TAT|TP53	0.464	Transcriptional coactivator cooperating with nuclear hormone receptors to potentiate transcriptional activation. Component of the CREST-BRG1 complex, a multiprotein complex that regulates promoter activation by orchestrating a calcium-dependent release of a repressor complex and a recruitment of an activator complex. In resting neurons, transcription of the c-FOS promoter is inhibited by BRG1-dep…
IRS1	IRS1_HUMAN	12	GRB2|HDAC2|IGF1R|JAK1|JAK2|MAPK8|PIK3R1|PRKCD|PTK2|PTPN1|PTPN11|YWHAE	0.464	May mediate the control of various cellular processes by insulin. When phosphorylated by the insulin receptor binds specifically to various cellular proteins containing SH2 domains such as phosphatidylinositol 3-kinase p85 subunit or GRB2. Activates phosphatidylinositol 3-kinase when bound to the regulatory p85 subunit (By similarity).
NUMB	NUMB_HUMAN	7	AP2A1|DPYSL2|EPS15|ITCH|LNX1|MDM2|SIAH1	0.464	Plays a role in the process of neurogenesis. Required throughout embryonic neurogenesis to maintain neural progenitor cells, also called radial glial cells (RGCs), by allowing their daughter cells to choose progenitor over neuronal cell fate. Not required for the proliferation of neural progenitor cells before the onset of neurogenesis. Also involved postnatally in the subventricular zone (SVZ) n…
MAGI1	MAGI1_HUMAN	9	ACCN3|ACTN4|ATN1|BAI1|CTNNB1|FCHSD2|LRP2|NET1|SYNPO	0.464	May play a role as scaffolding protein at cell-cell junctions. May regulate acid-induced ASIC3 currents by modulating its expression at the cell surface (By similarity).
RAD23A	RD23A_HUMAN	6	ATXN3|FILIP1|MDM2|PSMD4|SQSTM1|UBE3A	0.462	Involved in vpr-dependent replication of HIV-1 in non- proliferating cells and primary macrophages. Required for the association of HIV-1 vpr with the host proteasome.
GIPC1	GIPC1_HUMAN	12	ACTN1|ADRB1|ITGA5|ITGA6|KIF1B|LHCGR|LRP1|LRP2|RGS19|SLC2A1|TPBG|TYRP1	0.462	May be involved in G protein-linked signaling.
CTCFL	CTCFL_HUMAN	5	BAT3|HIST1H1A|HIST1H3A|HIST2H2AC|PRMT7	0.462	Testis-specific DNA binding protein responsible for insulator function, nuclear architecture and transcriptional control, which probably acts by recruiting epigenetic chromatin modifiers. Plays a key role in gene imprinting in male germline, by participating in the establishment of differential methylation at the IGF2/H19 imprinted control region (ICR). Directly binds the unmethylated H19 ICR and…
GRAP2	GRAP2_HUMAN	6	CCNDBP1|CD28|LAT|LCP2|MAP4K1|STAMBP	0.46	Interacts with SLP-76 to regulate NF-AT activation. Binds to tyrosine-phosphorylated shc.
ARNT	ARNT_HUMAN	10	AHR|AHRR|AIP|BRCA1|EPAS1|HIF1A|NCOA2|SIM1|SIM2|SRC	0.46	Required for activity of the Ah (dioxin) receptor. This protein is required for the ligand-binding subunit to translocate from the cytosol to the nucleus after ligand binding. The complex then initiates transcription of genes involved in the activation of PAH procarcinogens. The heterodimer with HIF1A or EPAS1/HIF2A functions as a transcriptional regulator of the adaptive response to hypoxia.
PPARGC1A	PRGC1_HUMAN	14	CREBBP|FBXW7|HNF4A|LRPPRC|MED1|MED12|MED14|MED17|NCOA1|NR1H4|NR1I2|NRF1|RXRA|THRB	0.46	Transcriptional coactivator for steroid receptors and nuclear receptors. Greatly increases the transcriptional activity of PPARG and thyroid hormone receptor on the uncoupling protein promoter. Can regulate key mitochondrial genes that contribute to the program of adaptive thermogenesis.
FHL2	FHL2_HUMAN	19	AR|BMPR2|BRCA1|CREB1|CTNNB1|EIF6|FHL3|IGFBP5|ITGA3|ITGA7|ITGB1|ITGB2|ITGB6|MAPK1|PSEN2|TRAF6|TTN|ZBTB16|ZNF638	0.46	May function as a molecular transmitter linking various signaling pathways to transcriptional regulation. Negatively regulates the transcriptional repressor E4F1 and may function in cell growth. Inhibits the transcriptional activity of FOXO1 and its apoptotic function by enhancing the interaction of FOXO1 with SIRT1 and FOXO1 deacetylation.
DNMT1	DNMT1_HUMAN	14	AKT1|DMAP1|DNMT3A|DNMT3B|EZH2|HDAC1|HDAC2|HELLS|MECP2|PCNA|RB1|SETD7|UHRF1|USP7	0.458	Methylates CpG residues. Preferentially methylates hemimethylated DNA. Associates with DNA replication sites in S phase maintaining the methylation pattern in the newly synthesized strand, that is essential for epigenetic inheritance. Associates with chromatin during G2 and M phases to maintain DNA methylation independently of replication. It is responsible for maintaining methylation patterns es…
CDT1	CDT1_HUMAN	17	ANAPC7|BAZ1B|CDC23|CUL4A|DDB1|FZR1|GMNN|GRWD1|HDAC11|MCM4|MYST2|NPM1|PCNA|SKP2|SMARCA5|TOP1|TOP2A	0.458	Cooperates with CDC6 to promote the loading of the mini- chromosome maintenance complex onto chromatin to form the pre- replication complex necessary to initiate DNA replication. Binds DNA in a sequence-, strand-, and conformation-independent manner. Potential oncogene.
FHL3	FHL3_HUMAN	5	CREB1|CTBP2|FHL2|ITGA7|KLF3	0.456	-
TERF2	TERF2_HUMAN	6	ORC1L|ORC2L|PRMT1|TERF2IP|WRN|XRCC6	0.456	Binds the telomeric double-stranded 5'-TTAGGG-3' repeat and plays a central role in telomere maintenance and protection against end-to-end fusion of chromosomes. In addition to its telomeric DNA-binding role, required to recruit a number of factors and enzymes required for telomere protection, including the shelterin complex, TERF2IP/RAP1 and DCLRE1B/Apollo. Component of the shelterin complex (te…
RBX1	RBX1_HUMAN	13	CDC34|CUL1|CUL2|CUL3|CUL4A|CUL5|CUL7|DCUN1D1|FBXO18|RPS6KB1|SKP1|SKP2|SMAD3	0.456	E3 ubiquitin ligase component of multiple cullin-RING- based E3 ubiquitin-protein ligase complexes which mediate the ubiquitination and subsequent proteasomal degradation of target proteins, including proteins involved in cell cycle progression, signal transduction, transcription and transcription-coupled nucleotide excision repair. The functional specificity of the E3 ubiquitin-protein ligase co…
MTA2	MTA2_HUMAN	6	BCL11B|ESR1|HNRNPD|MBD2|MBD3|TP53	0.454	May be involved in the regulation of gene expression as repressor and activator. The repression might be related to covalent modification of histone proteins.
EPS8	EPS8_HUMAN	6	ABI1|BAIAP2|DVL1|SHB|SHC1|SRC	0.454	Upon binding to EGF receptor/EGFR enhances EGF-dependent mitogenic signals. Can bind multiple cellular targets.
BIRC5	BIRC5_HUMAN	8	AURKB|CASP3|CASP7|CDCA8|DIABLO|EVI5|INCENP|XIAP	0.454	Multitasking protein that has dual roles in promoting cell proliferation and preventing apoptosis. Component of a chromosome passage protein complex (CPC) which is essential for chromosome alignment and segregation during mitosis and cytokinesis. Acts as an important regulator of the localization of this complex; directs CPC movement to different locations from the inner centromere during prometa…
SNAP23	SNP23_HUMAN	12	CFTR|KIF5B|NAPA|SNAPIN|STX11|STX1A|STX2|STX3|STX4|STX6|VAMP2|VAMP7	0.454	Essential component of the high affinity receptor for the general membrane fusion machinery and an important regulator of transport vesicle docking and fusion.
ERBB2IP	LAP2_HUMAN	6	DST|ERBB2|ITGB4|PKP4|SMAD2|SMAD3	0.454	Acts as an adapter for the receptor ERBB2, in epithelia. By binding the unphosphorylated 'Tyr-1248' of receptor ERBB2, it may contribute to stabilize this unphosphorylated state.
SOCS1	SOCS1_HUMAN	7	COMMD1|CSF1R|GHR|JAK2|KIT|MAP3K5|TEC	0.454	SOCS family proteins form part of a classical negative feedback system that regulates cytokine signal transduction. SOCS1 is involved in negative regulation of cytokines that signal through the JAK/STAT3 pathway. Through binding to JAKs, inhibits their kinase activity. In vitro, also suppresses Tec protein- tyrosine activity. Appears to be a major regulator of signaling by interleukin 6 (IL6) and…
SNAP25	SNP25_HUMAN	10	ITSN1|KIF5B|SNAPIN|SRCIN1|STX1A|STX2|STX3|STX4|TRIM9|VAMP2	0.454	t-SNARE involved in the molecular regulation of neurotransmitter release. May play an important role in the synaptic function of specific neuronal systems. Associates with proteins involved in vesicle docking and membrane fusion. Regulates plasma membrane recycling through its interaction with CENPF.
FKBP1A	FKB1A_HUMAN	6	ACVR1B|GLMN|ITPR1|MTOR|RYR1|TGFBR1	0.454	Keeps in an inactive conformation TGFBR1, the TGF-beta type I serine/threonine kinase receptor, preventing TGF-beta receptor activation in absence of ligand. Recruites SMAD7 to ACVR1B which prevents the association of SMAD2 and SMAD3 with the activin receptor complex, thereby blocking the activin signal. May modulate the RYR1 calcium channel activity. PPIases accelerate the folding of proteins. I…
SMAD2	SMAD2_HUMAN	19	ANAPC10|DAB2|ERBB2IP|ESR1|FOXH1|INSR|KAT2B|LEF1|MEF2A|MYC|PIAS3|PIAS4|PIN1|SKI|SMAD4|SMURF2|SNW1|TGIF1|ZFYVE9	0.452	Receptor-regulated SMAD (R-SMAD) that is an intracellular signal transducer and transcriptional modulator activated by TGF-beta (transforming growth factor) and activin type 1 receptor kinases. Binds the TRE element in the promoter region of many genes that are regulated by TGF-beta and, on formation of the SMAD2/SMAD4 complex, activates transcription. May act as a tumor suppressor in colorectal …
PELP1	PELP1_HUMAN	5	AR|HIST1H3A|KDM1A|RB1|STAT3	0.452	Coactivator of estrogen receptor-mediated transcription and a corepressor of other nuclear hormone receptors and sequence- specific transcription factors. Plays a role in estrogen receptor (ER) genomic activity when present in the nuclear compartment by activating the ER target genes in a hormonal stimulation dependent manner. Can facilitate ER non-genomic signaling via SRC and PI3K interaction i…
NEDD4	NEDD4_HUMAN	28	AP1G2|CBLB|CDC25C|CPSF6|FGFR1|IGF1R|MLANA|MTMR4|N4BP3|NDFIP2|NTRK1|PMEPA1|POLR2A|PTEN|RAPGEF2|SCAMP3|SCN5A|SCNN1A|SCNN1B|SCNN1G|SLC6A3|TNK2|TTYH2|UBC|UBE2D2|UBE2D3|UBE2E1|UBE2L3	0.452	E3 ubiquitin-protein ligase which accepts ubiquitin from an E2 ubiquitin-conjugating enzyme in the form of a thioester and then directly transfers the ubiquitin to targeted substrates. Involved in the pathway leading to the degradation of VEGFR- 2/KDFR, independently of its ubiquitin-ligase activity. Monoubiquitinates IGF1R at multiple sites, thus leading to receptor internalization and degradati…
ATN1	ATN1_HUMAN	6	BAIAP2|ITCH|MAGI1|MAGI2|RUNX1T1|WWP2	0.452	Transcriptional corepressor. Recruits NR2E1 to repress transcription. Promotes vascular smooth cell (VSMC) migration and orientation (By similarity). Corepressor of MTG8 transcriptional repression. Has some intrinsic repression activity which is independent of the number of poly-Asn (polyQ) repeats.
MAPK8IP1	JIP1_HUMAN	9	DUSP16|LRP1|LRP2|MAP2K7|MAP3K10|MAP3K11|MAP3K12|MAPK8IP2|MAPK9	0.452	The JNK-interacting protein (JIP) group of scaffold proteins selectively mediates JNK signaling by aggregating specific components of the MAPK cascade to form a functional JNK signaling module. Required for JNK activation in response to excitotoxic stress. Cytoplasmic MAPK8IP1 causes inhibition of JNK- regulated activity by retaining JNK in the cytoplasm and inhibiting JNK phosphorylation of c-Ju…
MED29	MED29_HUMAN	6	MED1|MED12|MED13|MED17|MED20|MED21	0.45	Component of the Mediator complex, a coactivator involved in the regulated transcription of nearly all RNA polymerase II-dependent genes. Mediator functions as a bridge to convey information from gene-specific regulatory proteins to the basal RNA polymerase II transcription machinery. Mediator is recruited to promoters by direct interactions with regulatory proteins and serves as a scaffold for t…
SMARCB1	SNF5_HUMAN	17	AKT1|DPF2|GAG-POL|MCPH1|MLL3|MYC|PPP1CA|PPP1CB|PPP1CC|PPP1R15A|SIN3A|SMARCC1|SMARCE1|TAT|TP53|XPO1|YEATS4	0.45	Core component of the BAF (hSWI/SNF) complex. This ATP- dependent chromatin-remodeling complex plays important roles in cell proliferation and differentiation, in cellular antiviral activities and inhibition of tumor formation. The BAF complex is able to create a stable, altered form of chromatin that constrains fewer negative supercoils than normal. This change in supercoiling would be due to th…
TSG101	TS101_HUMAN	12	AATF|BCR|CDKN1A|EP300|HGS|LRSAM1|MGRN1|UBC|VPS28|VPS37A|VPS37B|VPS37C	0.45	Component of the ESCRT-I complex, a regulator of vesicular trafficking process. Binds to ubiquitinated cargo proteins and is required for the sorting of endocytic ubiquitinated cargos into multivesicular bodies (MVBs). Mediates the association between the ESCRT-0 and ESCRT-I complex. Required for completion of cytokinesis; the function requires CEP55. May be involved in cell growth and differenti…
CRKL	CRKL_HUMAN	19	ABL1|ARHGAP32|BCAR1|BCR|CBL|CD34|EPOR|GAB2|INPP5D|KIT|MAP4K1|MAP4K5|NEDD9|PIK3R2|PXN|RAPGEF1|STAT5A|SYK|WAS	0.45	May mediate the transduction of intracellular signals.
GRB10	GRB10_HUMAN	9	ABL1|BCR|GIGYF1|IGF1R|INSR|KIT|MAP2K1|RAF1|RET	0.448	Adapter protein which modulates coupling of a number of cell surface receptor kinases with specific signaling pathways. Binds to, and suppress signals from, activated receptors tyrosine kinases, including the insulin (INSR) and insulin-like growth factor (IGF1R) receptors. The inhibitory effect can be achieved by 2 mechanisms: interference with the signaling pathway and increased receptor degrada…
UBE2N	UBE2N_HUMAN	10	AURKA|HLTF|OTUB1|TMEM189|TP53|TRAF6|TRIM32|UBC|UBE2V1|UBE2V2	0.448	The UBE2V1-UBE2N and UBE2V2-UBE2N heterodimers catalyze the synthesis of non-canonical 'Lys-63'-linked polyubiquitin chains. This type of polyubiquitination does not lead to protein degradation by the proteasome. Mediates transcriptional activation of target genes. Plays a role in the control of progress through the cell cycle and differentiation. Plays a role in the error-free DNA repair pathway…
PDPK1	PDPK1_HUMAN	7	PKN1|PKN2|PRKACA|PRKCD|PRKCI|PRKCZ|YWHAH	0.448	Serine/threonine kinase which acts as a master kinase, phosphorylating and activating a subgroup of the AGC family of protein kinases. Its targets include: protein kinase B (PKB/AKT1, PKB/AKT2, PKB/AKT3), p70 ribosomal protein S6 kinase (RPS6KB1), p90 ribosomal protein S6 kinase (RPS6KA1, RPS6KA2 and RPS6KA3), cyclic AMP-dependent protein kinase (PRKACA), protein kinase C (PRKCD and PRKCZ), serum…
PPP1R15A	PR15A_HUMAN	6	BAG1|CUEDC2|LYN|MLL|SMARCB1|TSN	0.446	Recruits the serine/threonine-protein phosphatase PP1 to dephosphorylate the translation initiation factor eIF-2A/EIF2S1, thereby reversing the shut-off of protein synthesis initiated by stress-inducible kinases and facilitating recovery of cells from stress. Down-regulates the TGF-beta signaling pathway by promoting dephosphorylation of TGFB1 by PP1. May promote apoptosis by inducing TP53 phosph…
MED1	MED1_HUMAN	20	AR|BRCA1|ESR1|ESR2|GABPA|GATA1|GATA2|HNF4A|MED18|MED28|MED29|POU1F1|PPARG|PPARGC1A|RARA|RXRA|TGS1|THRA|TP53|VDR	0.446	Component of the Mediator complex, a coactivator involved in the regulated transcription of nearly all RNA polymerase II-dependent genes. Mediator functions as a bridge to convey information from gene-specific regulatory proteins to the basal RNA polymerase II transcription machinery. Mediator is recruited to promoters by direct interactions with regulatory proteins and serves as a scaffold for t…
THRB	THB_HUMAN	12	BRD8|CCND1|HDAC3|NCOA1|NCOA6|NCOR1|NCOR2|NR2F6|PPARGC1A|PRKDC|RXRA|TRIP4	0.446	High affinity receptor for triiodothyronine.
BRD4	BRD4_HUMAN	7	CCNT1|RFC1|RFC2|RFC3|RFC4|RFC5|SIPA1	0.446	Plays a role in a process governing chromosomal dynamics during mitosis (By similarity).
NCOA3	NCOA3_HUMAN	23	ABL1|ANKRD11|AR|BRCA1|CARM1|CHUK|CREBBP|CSNK1E|DDX17|EP300|ESR1|ESR2|FOS|IKBKB|IKBKG|NCOR1|NCOR2|NR3C1|PPARG|RARA|SPOP|UBC|VDR	0.446	Nuclear receptor coactivator that directly binds nuclear receptors and stimulates the transcriptional activities in a hormone-dependent fashion. Plays a central role in creating a multisubunit coactivator complex, which probably acts via remodeling of chromatin. Involved in the coactivation of different nuclear receptors, such as for steroids (GR and ER), retinoids (RARs and RXRs), thyroid hormon…
TRIM63	TRI63_HUMAN	6	CKM|GMEB1|SUMO2|TNNC1|TRIM54|TTN	0.446	E3 ubiquitin ligase. Regulates proteasomal degradation of cardiac troponin I/TNNI3 and probably of other sarcomeric- associated proteins. May play a role in striated muscle atrophy and hypertrophy by regulating an anti-hypertrophic PKC-mediated signaling pathway. May regulate the organization of myofibrils through TTN in muscle cells.
COMMD1	COMD1_HUMAN	6	CLU|CUL1|CUL2|CUL3|RELA|SOCS1	0.444	Promotes ubiquitination of NF-kappa-B subunit RELA and its subsequent proteasomal degradation. Down-regulates NF-kappa-B activity. Down-regulates SOD1 activity by interfering with its homodimerization. Plays a role in copper ion homeostasis. Can bind one copper ion per monomer. May function to facilitate biliary copper excretion within hepatocytes.
RANBP9	RANB9_HUMAN	13	AR|C20ORF11|CALB1|DISC1|DYRK1B|HIPK2|MET|MKLN1|NR3C1|S100A7|TP73|TRAF6|USP11	0.444	May act as an adapter protein to couple membrane receptors to intracellular signaling pathways. May be involved in signaling of ITGB2/LFA-1 and other integrins. Enhances HGF-MET signaling by recruiting Sos and activating the Ras pathway. Enhances dihydrotestosterone-induced transactivation activity of AR, as well as dexamethasone-induced transactivation activity of NR3C1, but not affect estrogen-…
MAPK1	MK01_HUMAN	28	ADAM17|CDC25C|CENPE|CIITA|DUSP1|DUSP22|DUSP3|ELK1|EP300|ESR1|FHL2|HDAC4|MAP2K1|MKNK1|MKNK2|MYC|NEK2|PEA15|PTPN7|RPS6KA1|SORBS3|STAT5A|TNIP1|TOB1|TOP2A|TP53|TSC2|UBR5	0.442	Serine/threonine kinase which acts as an essential component of the MAP kinase signal transduction pathway. MAPK1/ERK2 and MAPK3/ERK1 are the 2 MAPKs which play an important role in the MAPK/ERK cascade. They participate also in a signaling cascade initiated by activated KIT and KITLG/SCF. Depending on the cellular context, the MAPK/ERK cascade mediates diverse biological functions such as cell g…
PPP1R8	PP1R8_HUMAN	6	EED|EZH2|HDAC2|PPP1CA|PPP1CC|SF3B1	0.442	Inhibitor subunit of the major nuclear protein phosphatase-1 (PP-1). It has RNA-binding activity but does not cleave RNA and may target PP-1 to RNA-associated substrates. May also be involved in pre-mRNA splicing. Binds DNA and might act as a transcriptional repressor. Seems to be required for cell proliferation.
PPP1CC	PP1G_HUMAN	5	HDAC6|PPP1R8|PPP1R9B|SMARCB1|TLX1	0.442	Protein phosphatase that associates with over 200 regulatory proteins to form highly specific holoenzymes which dephosphorylate hundreds of biological targets. Protein phosphatase 1 (PP1) is essential for cell division, and participates in the regulation of glycogen metabolism, muscle contractility and protein synthesis. Dephosphorylates RPS6KB1. Involved in regulation of ionic conductances and l…
PPARA	PPARA_HUMAN	8	AIP|EP300|HSP90AA1|MECR|NCOA1|NCOR1|NR1H3|NRIP1	0.44	Ligand-activated transcription factor. Key regulator of lipid metabolism. Activated by the endogenous ligand 1-palmitoyl- 2-oleoyl-sn-glycerol-3-phosphocholine (16:0/18:1-GPC). Activated by oleylethanolamide, a naturally occurring lipid that regulates satiety (By similarity). Receptor for peroxisome proliferators such as hypolipidemic drugs and fatty acids. Regulates the peroxisomal beta-oxidatio…
ARHGEF7	ARHG7_HUMAN	7	CBL|CDC42|GIT1|PAK1|SHANK1|SHANK2|SHANK3	0.44	Acts as a RAC1 guanine nucleotide exchange factor (GEF) and can induce membrane ruffling. Functions in cell migration, attachment and cell spreading. Promotes targeting of RAC1 to focal adhesions (By similarity). May function as a positive regulator of apoptosis. Downstream of NMDA receptors and CaMKK-CaMK1 signaling cascade, promotes the formation of spines and synapses in hippocampal neurons.
ASF1B	ASF1B_HUMAN	6	CHAF1A|CHAF1B|HCFC1|HIRA|TLK1|TLK2	0.44	Histone chaperone that facilitates histone deposition and histone exchange and removal during nucleosome assembly and disassembly. Cooperates with chromatin assembly factor 1 (CAF-1) to promote replication-dependent chromatin assembly. Does not participate in replication-independent nucleosome deposition which is mediated by ASF1A and HIRA. Required for spermatogenesis.
NEDD9	CASL_HUMAN	10	CDH1|CRK|CRKL|ID2|ITCH|LYN|MICAL1|NCK1|PTK2|SMAD3	0.44	Docking protein which plays a central coordinating role for tyrosine-kinase-based signaling related to cell adhesion. May function in transmitting growth control signals between focal adhesions at the cell periphery and the mitotic spindle in response to adhesion or growth factor signals initiating cell proliferation. May play an important role in integrin beta-1 or B cell antigen receptor (BCR) …
VHL	VHL_HUMAN	20	CUL2|DNAJA3|EPAS1|HIF1A|HIF3A|MCM7|MYBBP1A|NR4A1|PHF17|POLR2A|POLR2G|PSMC3|TCEB1|TCEB2|TP53|UBC|USP20|USP33|VBP1|ZNF197	0.44	Involved in the ubiquitination and subsequent proteasomal degradation via the von Hippel-Lindau ubiquitination complex. Seems to act as target recruitment subunit in the E3 ubiquitin ligase complex and recruits hydroxylated hypoxia- inducible factor (HIF) under normoxic conditions. Involved in transcriptional repression through interaction with HIF1A, HIF1AN and histone deacetylases. Ubiquitinate…
MAPK8IP3	JIP3_HUMAN	8	KLC1|KLC2|MAP2K1|MAP2K7|MAP3K5|MAPK10|MAPK8|RAF1	0.438	The JNK-interacting protein (JIP) group of scaffold proteins selectively mediates JNK signaling by aggregating specific components of the MAPK cascade to form a functional JNK signaling module. May function as a regulator of vesicle transport, through interactions with the JNK-signaling components and motor proteins (By similarity).
NFYB	NFYB_HUMAN	6	CEBPZ|CNTN2|EP300|MYC|NFYA|TBP	0.438	Stimulates the transcription of various genes by recognizing and binding to a CCAAT motif in promoters, for example in type 1 collagen, albumin and beta-actin genes.
PACSIN1	PACN1_HUMAN	5	ARHGAP17|DNM1|HTT|PACSIN2|PACSIN3	0.436	May play a role in vesicle formation and transport.
BCL6	BCL6_HUMAN	17	BCL6B|BCOR|CHD3|EP300|HDAC1|HDAC4|HDAC5|HDAC7|IRF4|JUN|MTA3|NCOR1|NCOR2|SIN3A|SPI1|ZBTB16|ZBTB7A	0.436	Transcriptional repressor which is required for germinal center formation and antibody affinity maturation. Probably plays an important role in lymphomagenesis.
TNFAIP3	TNAP3_HUMAN	9	IKBKG|RIPK1|TAX1BP1|TNIP1|TRAF1|TRAF2|YWHAB|YWHAH|YWHAZ	0.436	Ubiquitin-editing enzyme that contains both ubiquitin ligase and deubiquitinase activities. Involved in immune and inflammatory responses signaled by cytokines, such as TNF-alpha and IL-1 beta, or pathogens via Toll-like receptors (TLRs) through terminating NF-kappa-B activity. Essential component of a ubiquitin-editing protein complex, comprising also RNF11, ITCH and TAX1BP1, that ensures the tr…
BTG2	BTG2_HUMAN	5	CNOT7|CNOT8|HOXB9|PICK1|PRMT1	0.434	Involved in cell cycle regulation. Could be involved in the growth arrest and differentiation of the neuronal precursors (By similarity). Anti-proliferative protein. Modulates transcription regulation mediated by ESR1. Involved in mitochondrial depolarization and neurite outgrowth.
SMAD1	SMAD1_HUMAN	11	HIPK2|HOXC8|NKX3-2|PIAS4|PSMB4|SKI|SMURF1|SMURF2|STUB1|UBC|ZCCHC12	0.434	Transcriptional modulator activated by BMP (bone morphogenetic proteins) type 1 receptor kinase. SMAD1 is a receptor-regulated SMAD (R-SMAD). SMAD1/OAZ1/PSMB4 complex mediates the degradation of the CREBBP/EP300 repressor SNIP1.
CDC6	CDC6_HUMAN	9	ATR|CCNA2|HUWE1|MCM7|ORC1L|ORC2L|PPP2R3A|PPP2R3B|PSKH1	0.434	Involved in the initiation of DNA replication. Also participates in checkpoint controls that ensure DNA replication is completed before mitosis is initiated.
ESR2	ESR2_HUMAN	11	EP300|ESR1|KLF5|MAD2L1|MED1|MSH2|NCOA1|NCOA3|NCOA6|RBM39|SRC	0.434	Nuclear hormone receptor. Binds estrogens with an affinity similar to that of ESR1, and activates expression of reporter genes containing estrogen response elements (ERE) in an estrogen-dependent manner. Isoform beta-cx lacks ligand binding ability and has no or only very low ere binding activity resulting in the loss of ligand-dependent transactivation ability. DNA- binding by ESR1 and ESR2 is r…
GIT1	GIT1_HUMAN	12	ARHGEF7|GIT2|HTT|PCLO|PLCG1|PPFIA1|PPFIA2|PPFIA3|PPFIA4|PTK2|PXN|TGFB1I1	0.432	GTPase-activating protein for the ADP ribosylation factor family. May serve as a scaffold to bring together molecules to form signaling modules controlling vesicle trafficking, adhesion and cytoskeletal organization. Increases the speed of cell migration, as well as the size and rate of formation of protrusions, possibly by targeting PAK1 to adhesions and the leading edge of lamellipodia. Sequest…
RIPK1	RIPK1_HUMAN	12	BIRC2|BIRC3|CA11|FADD|PELI1|RIPK3|RNF216|SQSTM1|TNFAIP3|TRADD|TRAF2|UBC	0.432	Serine-threonine kinase which transduces inflammatory and cell-death signals (necroptosis) following death receptors ligation, activation of pathogen recognition receptors (PRRs), and DNA damage. Upon activation of TNFR1 by the TNF-alpha family cytokines, TRADD and TRAF2 are recruited to the receptor. Ubiquitination by TRAF2 via 'Lys-63'-link chains acts as a critical enhancer of communication wi…
STAT5A	STA5A_HUMAN	11	CARM1|CENPJ|CRKL|EPOR|JAK1|JAK2|JAK3|MAPK1|NMI|PRMT1|PTPN11	0.432	Carries out a dual function: signal transduction and activation of transcription. Mediates cellular responses to the cytokine KITLG/SCF and other growth factors. Mediates cellular responses to ERBB4. May mediate cellular responses to activated FGFR1, FGFR2, FGFR3 and FGFR4. Binds to the GAS element and activates PRL-induced transcription. Regulates the expression of milk proteins during lactation.
ERCC6	ERCC6_HUMAN	6	HIST1H2AB|HIST1H2BB|HIST1H3A|HIST1H4A|TP53|XPA	0.432	Essential factor involved in transcription-coupled nucleotide excision repair which allows RNA polymerase II-blocking lesions to be rapidly removed from the transcribed strand of active genes. Upon DNA-binding, it locally modifies DNA conformation by wrapping the DNA around itself, thereby modifying the interface between stalled RNA polymerase II and DNA. It is required for transcription-coupled …
NEDD8	NEDD8_HUMAN	8	AHR|CUL2|DNMT3B|NUB1|TP53|UBA3|UBE2M|UCHL3	0.432	Ubiquitin-like protein which plays an important role in cell cycle control and embryogenesis. Covalent attachment to its substrates requires prior activation by the E1 complex UBE1C- APPBP1 and linkage to the E2 enzyme UBE2M. Attachment of NEDD8 to cullins activates their associated E3 ubiquitin ligase activity, and thus promotes polyubiquitination and proteasomal degradation of cyclins and other…
RAD17	RAD17_HUMAN	7	ATM|ATR|HUS1|NHP2L1|POLE|RAD1|RAD9A	0.432	Essential for sustained cell growth, maintenance of chromosomal stability, and ATR-dependent checkpoint activation upon DNA damage. Has a weak ATPase activity required for binding to chromatin. Participates in the recruitment of the RAD1-RAD9- HUS1 complex and C12orf32/RHINO onto chromatin, and in CHEK1 activation. May also serve as a sensor of DNA replication progression, and may be involved in …
TAF1D	TAF1D_HUMAN	5	POLB|TAF1A|TAF1B|TAF1C|UBTF	0.432	Component of the transcription factor SL1/TIF-IB complex, which is involved in the assembly of the PIC (preinitiation complex) during RNA polymerase I-dependent transcription. The rate of PIC formation probably is primarily dependent on the rate of association of SL1/TIF-IB with the rDNA promoter. SL1/TIF-IB is involved in stabilization of nucleolar transcription factor 1/UBTF on rDNA. Formation …
GLI3	GLI3_HUMAN	6	CREBBP|MED12|SKI|SUFU|ZIC1|ZIC2	0.432	Has a dual function as a transcriptional activator and a repressor of the sonic hedgehog (Shh) pathway, and plays a role in limb development. The full-length GLI3 form (GLI3FL) after phosphorylation and nuclear translocation, acts as an activator (GLI3A) while GLI3R, its C-terminally truncated form, acts as a repressor. A proper balance between the GLI3 activator and the repressor GLI3R, rather t…
PARD3	PARD3_HUMAN	5	F11R|JAM2|JAM3|PRKCI|PVRL3	0.432	Adapter protein involved in asymmetrical cell division and cell polarization processes. Seems to play a central role in the formation of epithelial tight junctions. Targets the phosphatase PTEN to cell junctions (By similarity). Association with PARD6B may prevent the interaction of PARD3 with F11R/JAM1, thereby preventing tight junction assembly. The PARD6-PARD3 complex links GTP-bound Rho small…
GOPC	GOPC_HUMAN	7	ACCN3|BECN1|CFTR|CSPG5|GRID2|RHOQ|STX6	0.432	Plays a role in intracellular protein trafficking and degradation. May regulate CFTR chloride currents and acid-induced ASIC3 currents by modulating cell surface expression of both channels. May also regulate the intracellular trafficking of the ADR1B receptor. May play a role in autophagy. Overexpression results in CFTR intracellular retention and degradation in the lysosomes.
ILF3	ILF3_HUMAN	5	EIF2AK2|FUS|PRMT1|XPO5|YY1	0.432	May facilitate double-stranded RNA-regulated gene expression at the level of post-transcription. Can act as a translation inhibitory protein which binds to coding sequences of acid beta-glucosidase (GCase) and other mRNAs and functions at the initiation phase of GCase mRNA translation, probably by inhibiting its binding to polysomes. Can regulate protein arginine N- methyltransferase 1 activity. …
NEK2	NEK2_HUMAN	5	CEP250|CLEC4C|MAPK1|NDC80|PPP1R2	0.432	Protein kinase which is involved in the control of centrosome separation and bipolar spindle formation in mitotic cells and chromatin condensation in meiotic cells. Regulates centrosome separation (essential for the formation of bipolar spindles and high-fidelity chromosome separation) by phosphorylating centrosomal proteins such as CROCC, CEP250 and NINL, resulting in their displacement from the…
SLC9A3R1	NHRF1_HUMAN	15	CFTR|CTNNB1|EZR|GNAQ|KCNJ1|OPRK1|PAG1|PDGFRA|PDGFRB|PDZK1|PLCB1|PTH1R|SLC9A3|TRPC4|YAP1	0.43	Scaffold protein that connects plasma membrane proteins with members of the ezrin/moesin/radixin family and thereby helps to link them to the actin cytoskeleton and to regulate their surface expression. Necessary for recycling of internalized ADRB2. Was first known to play a role in the regulation of the activity and subcellular location of SLC9A3. Necessary for cAMP-mediated phosphorylation and …
KAT5	KAT5_HUMAN	18	AR|BCL3|CDKN2A|CREB1|EDNRA|ETV6|FANCD2|H2AFX|HDAC7|KLF4|MDM2|MYC|NMI|NR1D2|PLA2G4A|PML|SIRT1|SRSF2	0.43	Catalytic subunit of the NuA4 histone acetyltransferase complex which is involved in transcriptional activation of select genes principally by acetylation of nucleosomal histones H4 and H2A. This modification may both alter nucleosome-DNA interactions and promote interaction of the modified histones with other proteins which positively regulate transcription. This complex may be required for the …
SLC9A3R2	NHRF2_HUMAN	8	ACTN4|CFTR|EZR|KCNJ1|PLCB3|PODXL|PTH1R|SGK1	0.43	Scaffold protein that connects plasma membrane proteins with members of the ezrin/moesin/radixin family and thereby helps to link them to the actin cytoskeleton and to regulate their surface expression. Necessary for cAMP-mediated phosphorylation and inhibition of SLC9A3. May also act as scaffold protein in the nucleus.
UBE2D1	UB2D1_HUMAN	10	BIRC2|BIRC3|CUL2|DTX3L|MID1|RNF11|RNF2|RNF4|TOPORS|XIAP	0.43	Accepts ubiquitin from the E1 complex and catalyzes its covalent attachment to other proteins. In vitro catalyzes 'Lys- 48'-linked polyubiquitination. Mediates the selective degradation of short-lived and abnormal proteins. Functions in the E6/E6-AP- induced ubiquitination of p53/TP53. Mediates ubiquitination of PEX5 and auto-ubiquitination of STUB1, TRAF6 and TRIM63/MURF1. Ubiquitinates STUB1-as…
NCF2	NCF2_HUMAN	5	CYBA|NCF1|NCF4|PRDX6|RAC2	0.428	NCF2, NCF1, and a membrane bound cytochrome b558 are required for activation of the latent NADPH oxidase (necessary for superoxide production).
MAPT	TAU_HUMAN	6	BAG1|FYN|HDAC6|SIRT1|STUB1|YWHAZ	0.428	Promotes microtubule assembly and stability, and might be involved in the establishment and maintenance of neuronal polarity. The C-terminus binds axonal microtubules while the N- terminus binds neural plasma membrane components, suggesting that tau functions as a linker protein between both. Axonal polarity is predetermined by TAU/MAPT localization (in the neuronal cell) in the domain of the cel…
MBD1	MBD1_HUMAN	9	ATF7IP|CBX4|CBX5|CHAF1A|PIAS1|PIAS2|RNF2|SETDB1|SUV39H1	0.428	Transcriptional repressor that binds CpG islands in promoters where the DNA is methylated at position 5 of cytosine within CpG dinucleotides. Binding is abolished by the presence of 7-mG that is produced by DNA damage by methylmethanesulfonate (MMS). Acts as transcriptional repressor and plays a role in gene silencing by recruiting AFT7IP, which in turn recruits factors such as the histone methyl…
SUMO3	SUMO3_HUMAN	5	ARNTL|CHAF1A|TDG|UBA2|UBE2I	0.426	Ubiquitin-like protein which can be covalently attached to target lysines either as a monomer or as a lysine-linked polymer. Does not seem to be involved in protein degradation and may function as an antagonist of ubiquitin in the degradation process. Plays a role in a number of cellular processes such as nuclear transport, DNA replication and repair, mitosis and signal transduction. Covalent att…
ARHGDIA	GDIR1_HUMAN	5	CDC42|RAC1|RHOA|RHOH|RNF128	0.426	Regulates the GDP/GTP exchange reaction of the Rho proteins by inhibiting the dissociation of GDP from them, and the subsequent binding of GTP to them (By similarity).
HIPK2	HIPK2_HUMAN	14	DAXX|EP300|MYB|NLK|RANBP9|RUNX1|SIAH1|SIAH2|SKI|SMAD1|TP53|TP53INP1|UBE2I|WSB1	0.426	Serine/threonine-protein kinase involved in transcription regulation, p53/TP53-mediated cellular apoptosis and regulation of the cell cycle. Acts as a corepressor of several transcription factors, including SMAD1 and POU4F1/Brn3a and probably NK homeodomain transcription factors. Phosphorylates PDX1, ATF1, PML, p53/TP53, CREB1, CTBP1, CBX4, RUNX1, EP300, CTNNB1, HMGA1 and ZBTB4. Inhibits cell gro…
EPS15	EPS15_HUMAN	14	AGFG1|AGFG2|CDC40|CRK|EPN1|EPN2|HGS|NUMB|NUMBL|PARK2|REPS2|STON2|SYNJ1|UBC	0.426	Involved in cell growth regulation. May be involved in the regulation of mitogenic signals and control of cell proliferation. Involved in the internalization of ligand-inducible receptors of the receptor tyrosine kinase (RTK) type, in particular EGFR. Plays a role in the assembly of clathrin-coated pits (By similarity).
GHR	GHR_HUMAN	8	CISH|PTPN1|PTPN2|PTPN3|PTPN9|PTPRH|SGTA|SOCS1	0.424	Isoform 2 up-regulates the production of GHBP and acts as a negative inhibitor of GH signaling.
SP1	SP1_HUMAN	46	AATF|ATF7IP|ATF7IP2|BCL11B|BCOR|CCNA2|E2F1|EP300|ESR1|GABPA|GATA3|GATA4|GATA6|HBZ|HCFC1|HDAC1|HMGA1|HNF4A|HSP90AA1|HTT|JUN|KLF6|MEF2C|MEF2D|MYCN|NCOR1|NCOR2|NFKB1|NR5A1|PARP1|PML|POU2F1|PPARG|PPP1R13L|PRKCD|PRKCZ|PSMC5|RARA|RELA|RXRA|SMARCA4|SREBF2|SUMO1|TAL1|TP53|ZBTB7A	0.424	Transcription factor that can activate or repress transcription in response to physiological and pathological stimuli. Binds with high affinity to GC-rich motifs and regulates the expression of a large number of genes involved in a variety of processes such as cell growth, apoptosis, differentiation and immune responses. Highly regulated by post-translational modifications (phosphorylations, sumo…
CHD4	CHD4_HUMAN	7	ATM|HDAC1|PCNT|RBBP4|RBBP7|SMARCA4|TRIM27	0.424	Component of the histone deacetylase NuRD complex which participates in the remodeling of chromatin by deacetylating histones.
SUMO2	SUMO2_HUMAN	8	CHAF1A|KDM1A|PIAS1|RCOR1|SENP3|TDG|TRIM63|ZMYM2	0.422	Ubiquitin-like protein that can be covalently attached to proteins as a monomer or as a lysine-linked polymer. Covalent attachment via an isopeptide bond to its substrates requires prior activation by the E1 complex SAE1-SAE2 and linkage to the E2 enzyme UBE2I, and can be promoted by an E3 ligase such as PIAS1-4, RANBP2 or CBX4. This post-translational modification on lysine residues of proteins …
ELSPBP1	ESPB1_HUMAN	6	ID1|ID2|ID3|MYF5|MYOD1|MYOG	0.422	Binds to spermatozoa upon ejaculation and may play a role in sperm capacitation. Has phosphorylcholine-binding activity (By similarity).
SMARCA2	SMCA2_HUMAN	15	AR|ARID1B|CBX5|CDX2|CEBPA|CEBPB|DPF2|KHDRBS1|MECP2|NR0B2|NR4A2|PRMT5|SIN3A|SS18|TAT	0.422	Transcriptional coactivator cooperating with nuclear hormone receptors to potentiate transcriptional activation. Also involved in vitamin D-coupled transcription regulation via its association with the WINAC complex, a chromatin-remodeling complex recruited by vitamin D receptor (VDR), which is required for the ligand-bound VDR-mediated transrepression of the CYP27B1 gene. Belongs to the neural p…
HGS	HGS_HUMAN	10	CLTC|DLG4|EPS15|HAP1|IL2RB|LYST|NF2|STAM|STAM2|TSG101	0.422	Involved in intracellular signal transduction mediated by cytokines and growth factors. When associated with STAM, it suppresses DNA signaling upon stimulation by IL-2 and GM-CSF. Could be a direct effector of PI3-kinase in vesicular pathway via early endosomes and may regulate trafficking to early and late endosomes by recruiting clathrin. May concentrate ubiquitinated receptors within clathrin-…
MAP2K7	MP2K7_HUMAN	7	DUSP19|GADD45B|MAP3K12|MAPK8|MAPK8IP1|MAPK8IP2|MAPK8IP3	0.42	Dual specificity protein kinase which acts as an essential component of the MAP kinase signal transduction pathway. Essential component of the stress-activated protein kinase/c-Jun N-terminal kinase (SAP/JNK) signaling pathway. With MAP2K4/MKK4, is the one of the only known kinase to directly activate the stress-activated protein kinase/c-Jun N-terminal kinases MAPK8/JNK1, MAPK9/JNK2 and MAPK10/J…
MDM4	MDM4_HUMAN	10	CDKN1A|CSNK1A1|E2F1|MDM2|PSMD2|TP53|TP73|UBC|USP7|YWHAG	0.42	Inhibits p53/TP53- and TP73/p73-mediated cell cycle arrest and apoptosis by binding its transcriptional activation domain. Inhibits degradation of MDM2. Can reverse MDM2-targeted degradation of TP53 while maintaining suppression of TP53 transactivation and apoptotic functions.
PPP1CA	PP1A_HUMAN	18	AKAP11|BCL2L1|BCL2L2|BRCA1|EIF2AK2|HCFC1|KCNQ1|LMTK2|PHACTR1|PHACTR3|PPP1R10|PPP1R8|PPP1R9B|RRP1B|SMARCB1|TOX4|TRIM28|WDR82	0.42	Protein phosphatase that associates with over 200 regulatory proteins to form highly specific holoenzymes which dephosphorylate hundreds of biological targets. Protein phosphatase 1 (PP1) is essential for cell division, and participates in the regulation of glycogen metabolism, muscle contractility and protein synthesis. Involved in regulation of ionic conductances and long-term synaptic plastici…
DVL3	DVL3_HUMAN	5	AXIN1|DAB2|DVL1|KLHL12|PRPF3	0.418	May play a role in the signal transduction pathway mediated by multiple Wnt genes.
PIM1	PIM1_HUMAN	7	CBX3|CDC25A|CDKN1A|NFATC1|NUMA1|SND1|SNX6	0.418	Proto-oncogene with serine/threonine kinase activity involved in cell survival and cell proliferation and thus providing a selective advantage in tumorigenesis. Exerts its oncogenic activity through: the regulation of MYC transcriptional activity, the regulation of cell cycle progression and by phosphorylation and inhibition of proapoptotic proteins (BAD, MAP3K5, FOXO3). Phosphorylation of MYC le…
STAMBP	STABP_HUMAN	9	CHMP1A|CHMP1B|CHMP2A|GRAP2|GRB2|RNF11|STAM|STAM2|VPS24	0.418	Zinc metalloprotease that specifically cleaves 'Lys-63'- linked polyubiquitin chains. Does not cleave 'Lys-48'-linked polyubiquitin chains (By similarity). Functions at the endosome and is able to oppose the ubiquitin-dependent sorting of receptors to lysosomes. Plays a role in signal transduction for cell growth and MYC induction mediated by IL-2 and GM-CSF. Potentiates BMP (bone morphogenetic p…
EPN1	EPN1_HUMAN	8	AP2A2|CLTC|EPS15|REPS2|SCNN1A|SCNN1B|SCNN1G|UBC	0.418	Binds to membranes enriched in phosphatidylinositol 4,5- bisphosphate (PtdIns(4,5)P2). Modifies membrane curvature and facilitates the formation of clathrin-coated invaginations (By similarity). Regulates receptor-mediated endocytosis.
HSPB1	HSPB1_HUMAN	8	CRYAA|CRYAB|CRYBB2|GATA1|HNRNPD|HSPB8|PRKD1|TGFB1I1	0.416	Involved in stress resistance and actin organization.
RING1	RING1_HUMAN	10	BMI1|CBX2|CBX4|CBX7|CBX8|E2F6|PCGF1|RNF2|RYBP|USP7	0.416	Constitutes one of the E3 ubiquitin-protein ligases that mediate monoubiquitination of 'Lys-119' of histone H2A, thereby playing a central role in histone code and gene regulation. H2A 'Lys-119' ubiquitination gives a specific tag for epigenetic transcriptional repression and participates in X chromosome inactivation of female mammals. Essential component of a Polycomb group (PcG) multiprotein PR…
CCNT1	CCNT1_HUMAN	11	AFF1|AHR|BRD4|CDK9|GRN|HEXIM1|MDFIC|MYC|NUFIP1|PML|TAT	0.416	Regulatory subunit of the cyclin-dependent kinase pair (CDK9/cyclin-T1) complex, also called positive transcription elongation factor B (P-TEFb), which is proposed to facilitate the transition from abortive to productive elongation by phosphorylating the CTD (carboxy-terminal domain) of the large subunit of RNA polymerase II (RNA Pol II). In case of HIV or SIV infections, binds to the transactiva…
MRE11A	MRE11_HUMAN	5	BRCA1|MDC1|NBN|RECQL5|XRCC6	0.416	Component of the MRN complex, which plays a central role in double-strand break (DSB) repair, DNA recombination, maintenance of telomere integrity and meiosis. The complex possesses single-strand endonuclease activity and double-strand- specific 3'-5' exonuclease activity, which are provided by MRE11A. RAD50 may be required to bind DNA ends and hold them in close proximity. This could facilitate …
PPP2CA	PP2AA_HUMAN	10	BCL2|BEST1|CCNG2|ETF1|HDAC7|PPP2R1A|PPP2R1B|PPP2R2A|PPP2R3B|TLX1	0.416	PP2A is the major phosphatase for microtubule-associated proteins (MAPs). PP2A can modulate the activity of phosphorylase B kinase casein kinase 2, mitogen-stimulated S6 kinase, and MAP-2 kinase. Cooperates with SGOL2 to protect centromeric cohesin from separase-mediated cleavage in oocytes specifically during meiosis I (By similarity). Can dephosphorylate SV40 large T antigen and p53/TP53. Activ…
NR3C1	GCR_HUMAN	30	CEBPB|CREBBP|DAP3|DAXX|HDAC6|HSP90AA1|MED14|NCOA1|NCOA2|NCOA3|NCOA4|NCOR1|NCOR2|NFKB1|NR2F2|NR3C2|NRIP1|POU2F1|PSMC3IP|RANBP9|RELA|SET|SMAD3|SMARCA4|SMARCD1|STAT3|TP53|TRIM28|TXN|YWHAH	0.416	Receptor for glucocorticoids (GC). Has a dual mode of action: as a transcription factor that binds to glucocorticoid response elements (GRE) and as a modulator of other transcription factors. Affects inflammatory responses, cellular proliferation and differentiation in target tissues. Could act as a coactivator for STAT5-dependent transcription upon growth hormone (GH) stimulation and could revea…
ITSN1	ITSN1_HUMAN	5	CDC42|SCAMP1|SNAP25|SOS1|STON2	0.416	Adapter protein that may provide indirect link between the endocytic membrane traffic and the actin assembly machinery. May regulate the formation of clathrin-coated vesicles. Isoform 1 could be involved in brain-specific synaptic vesicle recycling. Inhibits ARHGAP31 activity toward RAC1.
BLM	BLM_HUMAN	14	ATM|ATR|BRIP1|CHAF1A|FEN1|MLH1|RAD51|RAD51L3|RPA1|TOP3A|TP53|UBE2I|WRN|XRCC2	0.416	Participates in DNA replication and repair. Exhibits a magnesium-dependent ATP-dependent DNA-helicase activity that unwinds single- and double-stranded DNA in a 3'-5' direction. Involved in 5'-end resection of DNA during double-strand break (DSB) repair: unwinds DNA and recruits DNA2 which mediates the cleavage of 5'-ssDNA.
CDC34	UB2R1_HUMAN	5	BTRC|CDK9|CSNK2B|RBX1|RL2	0.416	Accepts ubiquitin from the E1 complex and catalyzes its covalent attachment to other proteins. In vitro catalyzes 'Lys- 48'-linked polyubiquitination. Cooperates with the E2 UBCH5C and the SCF(FBXW11) E3 ligase complex for the polyubiquitination of NFKBIA leading to its subsequent proteasomal degradation. Performs ubiquitin chain elongation building ubiquitin chains from the UBE2D3-primed NFKBIA-…
CSNK2B	CSK2B_HUMAN	12	BRCA1|BTF3|CD163|CDC34|CSNK2A1|CSNK2A2|FGF1|HIRIP3|LYST|RNF7|RPS6KB1|TRIB3	0.416	Participates in Wnt signaling (By similarity). Plays a complex role in regulating the basal catalytic activity of the alpha subunit.
SRF	SRF_HUMAN	18	ASCC1|ASCC2|ASCC3|ATF6|CEBPB|GATA4|GTF2F1|HDAC4|MKL1|MKL2|MYOCD|NCOA6|NCOR2|NFYA|PML|SRC|SSRP1|TEAD1	0.416	SRF is a transcription factor that binds to the serum response element (SRE), a short sequence of dyad symmetry located 300 bp to the 5' of the site of transcription initiation of some genes (such as FOS). Required for cardiac differentiation and maturation.
SUMO1	SUMO1_HUMAN	17	BRCA1|DAXX|DNMT3B|ESR1|FAS|JUN|NOS1|PIAS2|PLK3|PML|SP1|TDG|TNFRSF1A|TOP2A|TOP2B|TP53|UBE2I	0.414	Ubiquitin-like protein that can be covalently attached to proteins as a monomer or a lysine-linked polymer. Covalent attachment via an isopeptide bond to its substrates requires prior activation by the E1 complex SAE1-SAE2 and linkage to the E2 enzyme UBE2I, and can be promoted by E3 ligases such as PIAS1-4, RANBP2 or CBX4. This post-translational modification on lysine residues of proteins plays…
CCNB1	CCNB1_HUMAN	7	CDC27|CDK1|CDKN1A|GAPDH|RALBP1|TSPYL2|ZC3HC1	0.414	Essential for the control of the cell cycle at the G2/M (mitosis) transition.
CBX4	CBX4_HUMAN	8	BMI1|CTBP1|CTBP2|DNMT3A|KDM5B|MBD1|RING1|SUV39H1	0.414	E3 SUMO-protein ligase which facilitates SUMO1 conjugation by UBE2I.
SKP2	SKP2_HUMAN	17	CCNA1|CCNA2|CDK2|CDKN1B|CDT1|CKS1A|CKS1B|CUL1|E2F1|FOXO1|MYC|ORC1L|RBX1|SKP1|SMAD4|TRIM21|USP18	0.414	Substrate recognition component of a SCF (SKP1-CUL1-F- box protein) E3 ubiquitin-protein ligase complex which mediates the ubiquitination and subsequent proteasomal degradation of target proteins involved in cell cycle progression, signal transduction and transcription. Specifically recognizes phosphorylated CDKN1B/p27kip and is involved in regulation of G1/S transition. Degradation of CDKN1B/p27…
BCL2	BCL2_HUMAN	29	AVEN|BAD|BAK1|BAX|BCAP31|BCL2L1|BCL2L11|BECN1|BIK|BNIP2|BNIP3|BNIPL|CAPN2|HRK|KEAP1|NR4A1|PARK2|PMAIP1|PPP2CA|PSEN1|PXN|RAD9A|RAF1|RRAS|RTN4|SMN1|SOD1|TP53BP2|UBC	0.414	Suppresses apoptosis in a variety of cell systems including factor-dependent lymphohematopoietic and neural cells. Regulates cell death by controlling the mitochondrial membrane permeability. Appears to function in a feedback loop system with caspases. Inhibits caspase activity either by preventing the release of cytochrome c from the mitochondria and/or by binding to the apoptosis-activating fac…
IL16	IL16_HUMAN	10	GRIN2A|GRIN2D|HDAC3|HSPA8|KCNJ10|KCNJ15|KCNJ2|PPP1R12A|PPP1R12B|PPP1R12C	0.414	Isoform 3 is involved in cell cycle progression in T- cells. Appears to be involved in transcriptional regulation of SKP2 and is probably part of a transcriptional repression complex on the core promoter of the SKP2 gene. May act as a scaffold for GABPB1 (the DNA-binding subunit the GABP transcription factor complex) and HDAC3 thus maintaining transcriptional repression and blocking cell cycle pr…
CREB1	CREB1_HUMAN	14	ABL1|CCDC6|CEBPB|CREBBP|EP300|FHL2|FHL3|FHL5|HDAC1|KAT5|MYC|POU2F1|RPS6KA5|TP53	0.412	Phosphorylation-dependent transcription factor that stimulates transcription upon binding to the DNA cAMP response element (CRE), a sequence present in many viral and cellular promoters. Transcription activation is enhanced by the TORC coactivators which act independently of Ser-133 phosphorylation. Involved in different cellular processes including the synchronization of circadian rhythmicity an…
POU2F1	PO2F1_HUMAN	12	CREB1|EPRS|GAPDH|HMGA1|MNAT1|NCOR2|NR3C1|PBX1|POU2AF1|RELA|SP1|TBP	0.412	Transcription factor that binds to the octamer motif (5'-ATTTGCAT-3') and activates the promoters of the genes for some small nuclear RNAs (snRNA) and of genes such as those for histone H2B and immunoglobulins. Modulates transcription transactivation by NR3C1, AR and PGR (By similarity). In case of human herpes simplex virus (HSV) infection, POU2F1 forms a multiprotein-DNA complex with the viral …
SOCS3	SOCS3_HUMAN	7	EPOR|IGF1R|IL6ST|JAK2|LEPR|PTPN11|RASA1	0.412	SOCS family proteins form part of a classical negative feedback system that regulates cytokine signal transduction. SOCS3 is involved in negative regulation of cytokines that signal through the JAK/STAT pathway. Inhibits cytokine signal transduction by binding to tyrosine kinase receptors including gp130, LIF, erythropoietin, insulin, IL12, GCSF and leptin receptors. Binding to JAK2 inhibits its …
SNAPIN	SNAPN_HUMAN	6	BLOC1S2|DTNBP1|RGS7|SNAP23|SNAP25|TRPV1	0.412	May modulate a step between vesicle priming, fusion and calcium-dependent neurotransmitter release by potentiating the interaction of synaptotagmins with the SNAREs and the plasma- membrane-associated protein SNAP25. Its phosphorylation state influences exocytotic protein interactions and may regulate synaptic vesicle exocytosis. May also have a role in the mechanisms of SNARE-mediated membrane f…
PLSCR1	PLS1_HUMAN	5	CPSF6|NEU4|SHC1|SLPI|TFG	0.41	May mediate accelerated ATP-independent bidirectional transbilayer migration of phospholipids upon binding calcium ions that results in a loss of phospholipid asymmetry in the plasma membrane. May play a central role in the initiation of fibrin clot formation, in the activation of mast cells and in the recognition of apoptotic and injured cells by the reticuloendothelial system.
NR1H4	NR1H4_HUMAN	6	PPARGC1A|PRKDC|RXRA|SIRT1|XRCC5|XRCC6	0.41	Ligand-activated transcription factor. Receptor for bile acids such as chenodeoxycholic acid, lithocholic acid and deoxycholic acid. Represses the transcription of the cholesterol 7-alpha-hydroxylase gene (CYP7A1) through the induction of NR0B2 or FGF19 expression, via two distinct mechanisms. Activates the intestinal bile acid-binding protein (IBABP). Activates the transcription of bile salt exp…
THRA	THA_HUMAN	15	COPS2|GRIP1|HDAC3|ITGB3BP|MED1|MEF2A|NCOA1|NCOA6|NCOR1|NCOR2|NR0B2|NSD1|PRKDC|TAF11|TRIP11	0.41	Nuclear hormone receptor. High affinity receptor for triiodothyronine.
STAT6	STAT6_HUMAN	8	ANXA2|CREBBP|EP300|IRF4|NCOA1|NFKB1|SFPQ|SND1	0.41	Carries out a dual function: signal transduction and activation of transcription. Involved in interleukin-4 signalling.
U2AF2	U2AF2_HUMAN	7	PUF60|SF1|SRPK2|SRSF11|SRSF2IP|U2AF1|WT1	0.408	Necessary for the splicing of pre-mRNA. Induces cardiac troponin-T (TNNT2) pre-mRNA exon inclusion in muscle. Regulates the TNNT2 exon 5 inclusion through competition with MBNL1. Binds preferentially to a single-stranded structure within the polypyrimidine tract of TNNT2 intron 4 during spliceosome assembly. Required for the export of mRNA out of the nucleus, even if the mRNA is encoded by an int…
SYNCRIP	HNRPQ_HUMAN	5	A1CF|APOBEC1|SYT7|SYT8|SYT9	0.408	Heterogenous nuclear ribonucleoprotein (hnRNP) implicated in mRNA processing mechanisms. Component of the CRD- mediated complex that promotes MYC mRNA stability. Isoform 1, isoform 2 and isoform 3 are associated in vitro with pre-mRNA, splicing intermediates and mature mRNA protein complexes. Isoform 1 binds to apoB mRNA AU-rich sequences. Isoform 1 is part of the APOB mRNA editosome complex and …
TOP1	TOP1_HUMAN	8	BTBD1|BTBD2|CDT1|NCL|SRSF1|TOPORS|TP53|UBE2I	0.408	Releases the supercoiling and torsional tension of DNA introduced during the DNA replication and transcription by transiently cleaving and rejoining one strand of the DNA duplex. Introduces a single-strand break via transesterification at a target site in duplex DNA. The scissile phosphodiester is attacked by the catalytic tyrosine of the enzyme, resulting in the formation of a DNA-(3'-phosphotyr…
RARA	RARA_HUMAN	28	BAG1|C1ORF103|CCND3|CLOCK|HMGA1|IRX4|JUB|MED1|NCOA1|NCOA2|NCOA3|NCOA6|NCOR1|NCOR2|NPAS2|NR0B2|NR4A2|NRIP1|NSD1|PDIA3|PML|RXRA|SMARCD3|SP1|SRC|TADA3|TOP2B|ZBTB16	0.406	Receptor for retinoic acid. Retinoic acid receptors bind as heterodimers to their target response elements in response to their ligands, all-trans or 9-cis retinoic acid, and regulate gene expression in various biological processes. The RXR/RAR heterodimers bind to the retinoic acid response elements (RARE) composed of tandem 5'-AGGTCA-3' sites known as DR1-DR5. In the absence of ligand, the RXR-…
MCRS1	MCRS1_HUMAN	5	DAXX|NOP2|PHC2|PINX1|TERT	0.406	Modulates the transcription repressor activity of DAXX by recruiting it to the nucleolus. As part of the NSL complex it may be involved in acetylation of nucleosomal histone H4 on several lysine residues. Putative regulatory component of the chromatin remodeling INO80 complex which is involved in transcriptional regulation, DNA replication and probably DNA repair. May also be an inhibitor of TERT…
PXN	PAXI_HUMAN	8	BCL2|CRK|CRKL|GIT1|ITGB1|PTK2|PTK2B|PTPN12	0.406	Cytoskeletal protein involved in actin-membrane attachment at sites of cell adhesion to the extracellular matrix (focal adhesion).
RBM39	RBM39_HUMAN	5	ESR1|ESR2|HIST1H1C|JUN|NCOA6	0.406	Transcriptional coactivator for steroid nuclear receptors ESR1/ER-alpha and ESR2/ER-beta, and JUN/AP-1 (By similarity). May be involved in pre-mRNA splicing process.
CBX5	CBX5_HUMAN	25	ARL5A|ATRX|CBX1|CBX3|CHAF1A|CHAF1B|DNMT3B|H3F3A|HDAC4|HDAC5|HDAC9|HIST1H3A|HIST4H4|LBR|MBD1|NIPBL|PAX3|SMARCA2|SMARCA4|SP100|SUV39H1|SUV420H2|TAF4|TRIM28|XRCC6	0.406	Component of heterochromatin that recognizes and binds histone H3 tails methylated at 'Lys-9' (H3K9me), leading to epigenetic repression. In contrast, it is excluded from chromatin when 'Tyr-41' of histone H3 is phosphorylated (H3Y41ph). Can interact with lamin-B receptor (LBR). This interaction can contribute to the association of the heterochromatin with the inner nuclear membrane. Involved in …
PSEN1	PSN1_HUMAN	8	BCL2|CTNNB1|CTNND1|FLNB|GFAP|ICAM5|PKP4|UBQLN1	0.406	Probable catalytic subunit of the gamma-secretase complex, an endoprotease complex that catalyzes the intramembrane cleavage of integral membrane proteins such as Notch receptors and APP (beta-amyloid precursor protein). Requires the other members of the gamma-secretase complex to have a protease activity. May play a role in intracellular signaling and gene expression or in linking chromatin to t…
RAC1	RAC1_HUMAN	19	ARFIP2|ARHGDIA|ARHGEF4|FHOD1|FMNL1|IQGAP1|IQGAP2|MCF2L|MYD88|NCKAP1|PAK1|PAK2|PAK3|PARD6A|PARD6B|SET|STAT3|SYNJ2|UNKL	0.404	Plasma membrane-associated small GTPase which cycles between active GTP-bound and inactive GDP-bound states. In its active state, binds to a variety of effector proteins to regulate cellular responses such as secretory processes, phagocytosis of apoptotic cells, epithelial cell polarization and growth-factor induced formation of membrane ruffles. Rac1 p21/rho GDI heterodimer is the active compone…
RAF1	RAF1_HUMAN	32	AKT1|BAG1|BCL2|CDC25A|FYN|GRB10|HRAS|KRAS|MAP2K1|MAP3K1|MAP3K5|MAPK7|MAPK8IP3|MYC|PAK1|PEBP1|PEBP4|PHB|PRKCZ|RAP1A|RB1|RBL2|RHEB|RRAS|RRAS2|SRC|STUB1|TSC22D3|YWHAB|YWHAE|YWHAQ|YWHAZ	0.404	Serine/threonine-protein kinase that acts as a regulatory link between the membrane-associated Ras GTPases and the MAPK/ERK cascade, and this critical regulatory link functions as a switch determining cell fate decisions including proliferation, differentiation, apoptosis, survival and oncogenic transformation. RAF1 activation initiates a mitogen-activated protein kinase (MAPK) cascade that compr…
PIAS4	PIAS4_HUMAN	10	HTT|LEF1|PARP1|SMAD1|SMAD2|SMAD3|SMAD4|SMAD6|SMAD7|TRIM27	0.404	Functions as an E3-type small ubiquitin-like modifier (SUMO) ligase, stabilizing the interaction between UBE2I and the substrate, and as a SUMO-tethering factor. Plays a crucial role as a transcriptional coregulation in various cellular pathways, including the STAT pathway, the p53/TP53 pathway, the Wnt pathway and the steroid hormone signaling pathway. Involved in gene silencing. Mediates sumoyl…
RUNX1T1	MTG8_HUMAN	10	ATN1|GFI1|NCOR1|NCOR2|PRKAR2A|SIN3A|TCF12|UBE2E2|VDR|ZBTB16	0.404	Transcription regulator that excerts its function by binding to histone deacetylases and transcription factors. Can repress transactivation mediated by TCF12.
APPL1	DP13A_HUMAN	5	AKT2|DCC|HDAC1|HDAC2|RUVBL2	0.404	Required for the regulation of cell proliferation in response to extracellular signals from an early endosomal compartment. Links Rab5 to nuclear signal transduction.
BNIPL	BNIPL_HUMAN	5	BCL2|BCL2L1|CDC42|GFER|MIF	0.404	May be a bridge molecule between BCL2 and ARHGAP1/CDC42 in promoting cell death.
PIAS1	PIAS1_HUMAN	15	DCLRE1A|DDX5|DNMT3A|MBD1|NCOR1|SATB1|SIAH1|SIAH2|SP3|STAT1|SUMO2|TP53|TRIM27|UBE2I|ZNF76	0.404	Functions as an E3-type small ubiquitin-like modifier (SUMO) ligase, stabilizing the interaction between UBE2I and the substrate, and as a SUMO-tethering factor. Plays a crucial role as a transcriptional coregulation in various cellular pathways, including the STAT pathway, the p53 pathway and the steroid hormone signaling pathway. In vitro, binds A/T-rich DNA. The effects of this transcriptional…
CDC7	CDC7_HUMAN	7	CHAF1A|CLSPN|DBF4|MCM2|MCM4|MCM7|RAD18	0.404	Seems to phosphorylate critical substrates that regulate the G1/S phase transition and/or DNA replication. Can phosphorylates MCM2 and MCM3.
MECP2	MECP2_HUMAN	11	CDKL5|DNMT1|HDAC1|LBR|PRPF40A|PRPF40B|SIN3A|SKI|SMARCA2|SPI1|YY1	0.402	Chromosomal protein that binds to methylated DNA. It can bind specifically to a single methyl-CpG pair. It is not influenced by sequences flanking the methyl-CpGs. Mediates transcriptional repression through interaction with histone deacetylase and the corepressor SIN3A.
NR4A1	NR4A1_HUMAN	10	AKT1|BCL2|EP300|GADD45GIP1|NCOR2|PML|RXRA|TP53|TRIM28|VHL	0.402	Orphan nuclear receptor. May act concomitantly with NURR1 in regulating the expression of delayed-early genes during liver regeneration. Binds the NGFI-B response element (NBRE) 5'- AAAAGGTCA-3' (By similarity). May inhibit NF-kappa-B transactivation of IL2.
ATF2	ATF2_HUMAN	14	CEBPA|CEBPB|CREBBP|CSNK2A1|CSNK2A2|JDP2|JUN|MAPK14|MAPK8|NCOA6|SMAD3|SMAD4|UBE2I|UTF1	0.402	Transcriptional activator, probably constitutive, which binds to the cAMP-responsive element (CRE) (consensus: 5'- GTGACGT[AC][AG]-3'), a sequence present in many viral and cellular promoters. Interaction with JUN redirects JUN to bind to CRES preferentially over the 12-O-tetradecanoylphorbol-13-acetate response elements (TRES) as part of an ATF2/JUN complex.
PPARG	PPARG_HUMAN	16	EDF1|EP300|HDAC1|HDAC3|HMGA1|MED1|NCOA1|NCOA2|NCOA3|NCOA4|NLK|NR0B2|NRIP1|RB1|RXRA|SP1	0.402	Receptor that binds peroxisome proliferators such as hypolipidemic drugs and fatty acids. Once activated by a ligand, the receptor binds to a promoter element in the gene for acyl-CoA oxidase and activates its transcription. It therefore controls the peroxisomal beta-oxidation pathway of fatty acids. Key regulator of adipocyte differentiation and glucose homeostasis.
MYST2	-	6	AR|CDK11B|CDT1|JUN|ORC1L|TP53	0.402	-
CCNA2	CCNA2_HUMAN	15	CDC20|CDC6|CDK1|CDK2|CKS1B|E2F1|FEN1|FZR1|ITGB3BP|KAT2B|RBL1|SIC1|SKP2|SP1|UBC	0.402	Essential for the control of the cell cycle at the G1/S (start) and the G2/M (mitosis) transitions.
SQSTM1	SQSTM_HUMAN	7	GABARAPL1|GABARAPL2|MAP1LC3B|NTRK1|PRKCI|RAD23A|RIPK1	0.4	Adapter protein which binds ubiquitin and may regulate the activation of NFKB1 by TNF-alpha, nerve growth factor (NGF) and interleukin-1. May play a role in titin/TTN downstream signaling in muscle cells. May regulate signaling cascades through ubiquitination. Adapter that mediates the interaction between TRAF6 and CYLD (By similarity). May be involved in cell differentiation, apoptosis, immune r…
TGS1	TGS1_HUMAN	5	CREBBP|EED|EP300|MED1|NCOA6	0.4	Catalyzes the 2 serial methylation steps for the conversion of the 7-monomethylguanosine (m(7)G) caps of snRNAs and snoRNAs to a 2,2,7-trimethylguanosine (m(2,2,7)G) cap structure. The enzyme is specific for guanine, and N7 methylation must precede N2 methylation. Hypermethylation of the m7G cap of U snRNAs leads to their concentration in nuclear foci, their colocalization with coilin and the for…
TCF3	TFE2_HUMAN	15	CBFA2T3|CREBBP|EP300|ID1|ID3|KAT2B|LMX1A|LYL1|MAPKAPK3|MEN1|MYOD1|TAL1|TWIST1|UBE2I|VDR	0.4	Transcriptional regulator. Involved in the initiation of neuronal differentiation. Heterodimers between TCF3 and tissue- specific basic helix-loop-helix (bHLH) proteins play major roles in determining tissue-specific cell fate during embryogenesis, like muscle or early B-cell differentiation. Dimers bind DNA on E- box motifs: 5'-CANNTG-3'. Binds to the kappa-E2 site in the kappa immunoglobulin ge…
ZMYND11	ZMY11_HUMAN	6	BMPR1A|C11ORF30|ETS2|MYB|PDLIM7|TAB1	0.4	Corepressor of transcription (Probable).
ZYX	ZYX_HUMAN	6	ACTN1|ENAH|LASP1|LATS1|NEBL|VASP	0.4	Adhesion plaque protein. Binds alpha-actinin and the CRP protein. Important for targeting TES and ENA/VASP family members to focal adhesions and for the formation of actin-rich structures. May be a component of a signal transduction pathway that mediates adhesion-stimulated changes in gene expression (By similarity).
PDZK1	NHRF3_HUMAN	10	AKAP10|CFTR|CLCN3|FARP2|PDZK1IP1|SLC22A12|SLC22A4|SLC34A3|SLC9A3R1|SLK	0.4	A scaffold protein that connects plasma membrane proteins and regulatory components, regulating their surface expression in epithelial cells apical domains. May be involved in the coordination of a diverse range of regulatory processes for ion transport and second messenger cascades. In complex with SLC9A3R1, may cluster proteins that are functionally dependent in a mutual fashion and modulate th…
RAD9A	RAD9A_HUMAN	9	ABL1|AR|BCL2|BCL2L1|DNAJC7|HUS1|RAD1|RAD17|TOPBP1	0.398	Component of the 9-1-1 cell-cycle checkpoint response complex that plays a major role in DNA repair. The 9-1-1 complex is recruited to DNA lesion upon damage by the RAD17-replication factor C (RFC) clamp loader complex. Acts then as a sliding clamp platform on DNA for several proteins involved in long-patch base excision repair (LP-BER). The 9-1-1 complex stimulates DNA polymerase beta (POLB) act…
STAT2	STAT2_HUMAN	8	CREBBP|EP300|IFNAR1|IFNAR2|IRF9|MED14|SMARCA4|STAT1	0.398	Signal transducer and activator of transcription that mediates signaling by type I IFNs (IFN-alpha and IFN-beta). Following type I IFN binding to cell surface receptors, Jak kinases (TYK2 and JAK1) are activated, leading to tyrosine phosphorylation of STAT1 and STAT2. The phosphorylated STATs dimerize, associate with ISGF3G/IRF-9 to form a complex termed ISGF3 transcription factor, that enters th…
AHR	AHR_HUMAN	8	AIP|ARNT|ARNTL|CCNT1|NEDD8|NRIP1|RB1|SRC	0.396	Ligand-activated transcriptional activator. Binds to the XRE promoter region of genes it activates. Activates the expression of multiple phase I and II xenobiotic chemical metabolizing enzyme genes (such as the CYP1A1 gene). Mediates biochemical and toxic effects of halogenated aromatic hydrocarbons. Involved in cell-cycle regulation. Likely to play an important role in the development and matura…
XRCC1	XRCC1_HUMAN	8	APEX1|APTX|LIG3|OGG1|PARP1|PCNA|PNKP|POLB	0.396	Corrects defective DNA strand-break repair and sister chromatid exchange following treatment with ionizing radiation and alkylating agents.
PNN	PININ_HUMAN	10	CTBP1|KRT18|KRT19|KRT8|PPIG|PRPF4B|RNPS1|SFRS18|SRRM2|SRSF4	0.396	Transcriptional activator binding to the E-box 1 core sequence of the E-cadherin promoter gene; the core-binding sequence is 5'CAGGTG-3'. Capable of reversing CTBP1-mediated transcription repression. Component of a splicing-dependent multiprotein exon junction complex (EJC) deposited at splice junction on mRNAs. The EJC is a dynamic structure consisting of a few core proteins and several more per…
EZH2	EZH2_HUMAN	16	AKT1|ATRX|CDK1|DNMT1|DNMT3A|DNMT3B|EED|EPC1|HIST1H3A|JARID2|PHF1|PPP1R8|RBBP4|RBL2|SUZ12|VAV1	0.394	Polycomb group (PcG) protein. Catalytic subunit of the PRC2/EED-EZH2 complex, which methylates 'Lys-9' (H3K9me) and 'Lys- 27' (H3K27me) of histone H3, leading to transcriptional repression of the affected target gene. Able to mono-, di- and trimethylate 'Lys-27' of histone H3 to form H3K27me1, H3K27me2 and H3K27me3, respectively. Compared to EZH2-containing complexes, it is more abundant in embry…
DDIT3	DDIT3_HUMAN	8	ATF3|CEBPB|CEBPG|CSNK2A1|FOS|JUN|JUND|RPS3A	0.394	Inhibits the DNA-binding activity of C/EBP and LAP by forming heterodimers that cannot bind DNA.
DYNLL1	DYL1_HUMAN	8	BCL2L11|DLG4|DLGAP1|MYO5A|NFKBIA|NRF1|PAK1|TP53BP1	0.394	Promotes transactivation functions of ESR1 and plays a role in the nuclear localization of ESR1.
AURKB	AURKB_HUMAN	6	BIRC5|CDCA8|EVI5|HIST1H3A|INCENP|RB1	0.394	Serine/threonine-protein kinase component of the chromosomal passenger complex (CPC), a complex that acts as a key regulator of mitosis. The CPC complex has essential functions at the centromere in ensuring correct chromosome alignment and segregation and is required for chromatin-induced microtubule stabilization and spindle assembly. Involved in the bipolar attachment of spindle microtubules to…
IGFBP3	IBP3_HUMAN	7	ADAM12|COL1A1|FN1|IGF1|IGF2|RXRA|TF	0.394	IGF-binding proteins prolong the half-life of the IGFs and have been shown to either inhibit or stimulate the growth promoting effects of the IGFs on cell culture. They alter the interaction of IGFs with their cell surface receptors.
TAF1	TAF1_HUMAN	9	CCND1|GTF2F1|MDM2|RB1|TAF2|TAF6|TAF7|TBP|UBTF	0.392	Largest component and core scaffold of the TFIID basal transcription factor complex. Contains novel N- and C-terminal Ser/Thr kinase domains which can autophosphorylate or transphosphorylate other transcription factors. Phosphorylates TP53 on 'Thr-55' which leads to MDM2-mediated degradation of TP53. Phosphorylates GTF2A1 and GTF2F1 on Ser residues. Possesses DNA- binding activity. Essential for …
KLF5	KLF5_HUMAN	8	EP300|ESR1|ESR2|FBXW7|HDAC1|SET|TRIM25|WWP1	0.392	Transcription factor that binds to GC box promoter elements. Activates the transcription of these genes.
NCOA1	NCOA1_HUMAN	23	AR|CCND1|CIITA|CREBBP|DDX17|ESR1|ESR2|FOS|JUN|KAT2B|NR3C1|PPARA|PPARG|PPARGC1A|RARA|RXRA|SMARCE1|STAT3|STAT6|TEAD2|THRA|THRB|TRIP4	0.392	Nuclear receptor coactivator that directly binds nuclear receptors and stimulates the transcriptional activities in a hormone-dependent fashion. Involved in the coactivation of different nuclear receptors, such as for steroids (PGR, GR and ER), retinoids (RXRs), thyroid hormone (TRs) and prostanoids (PPARs). Also involved in coactivation mediated by STAT3, STAT5A, STAT5B and STAT6 transcription f…
HIF1A	HIF1A_HUMAN	23	ARNT|ARNTL|CREBBP|EGLN1|EP300|HDAC1|HDAC3|HDAC4|HDAC5|HIF1AN|HSP90AA1|HSPA4|MCM7|MDM2|MTA1|NAA10|OS9|PSMA7|SAT2|TP53|USP20|VHL|VHLL	0.392	Functions as a master transcriptional regulator of the adaptive response to hypoxia. Under hypoxic conditions, activates the transcription of over 40 genes, including erythropoietin, glucose transporters, glycolytic enzymes, vascular endothelial growth factor, HILPDA, and other genes whose protein products increase oxygen delivery or facilitate metabolic adaptation to hypoxia. Plays an essential …
ASH2L	ASH2L_HUMAN	6	HIST3H3|MEN1|MLL3|PYGO2|RBBP5|WDR5	0.392	Component of the Set1/Ash2 histone methyltransferase (HMT) complex, a complex that specifically methylates 'Lys-4' of histone H3, but not if the neighboring 'Lys-9' residue is already methylated. As part of the MLL1/MLL complex it is involved in methylation and dimethylation at 'Lys-4' of histone H3. May function as a transcriptional regulator. May play a role in hematopoiesis.
FANCD2	FACD2_HUMAN	10	ATM|BRCA1|BRCA2|FANCE|FANCI|KAT5|MEN1|PCNA|TNKS|USP1	0.392	Required for maintenance of chromosomal stability. Promotes accurate and efficient pairing of homologs during meiosis. Involved in the repair of DNA double-strand breaks, both by homologous recombination and single-strand annealing. May participate in S phase and G2 phase checkpoint activation upon DNA damage. Plays a role in preventing breakage and loss of missegregating chromatin at the end of …
PAX6	PAX6_HUMAN	5	CDX2|EP300|IPO13|RAX|TBP	0.39	Transcription factor with important functions in the development of the eye, nose, central nervous system and pancreas. Required for the differentiation of pancreatic islet alpha cells (By similarity). Competes with PAX4 in binding to a common element in the glucagon, insulin and somatostatin promoters. Regulates specification of the ventral neuron subtypes by establishing the correct progenitor …
TAF1B	TAF1B_HUMAN	7	ESR1|HIST1H3A|HIST2H2AC|HIST2H2BE|RRN3|TAF1D|THAP7	0.39	Component of RNA polymerase I core factor complex that acts as a GTF2B/TFIIB-like factor and plays a key role in multiple steps during trancription initiation such as preinitiation complex (PIC) assembly and postpolymerase recruitment events in polymerase I (Pol I) transcription. Binds rDNA promoters and plays a role in Pol I recruitment as a component of the SL1/TIF-IB complex and, possibly, dir…
CDC42	CDC42_HUMAN	36	ARHGAP1|ARHGAP32|ARHGDIA|ARHGEF7|BAIAP2|BNIP2|BNIPL|CBL|CDC42EP2|CDC42EP3|CDC42EP5|DIAP3|ERRFI1|GDI1|IQGAP1|IQGAP2|ITSN1|KIN|MAP3K10|MAP3K11|MCF2L|NET1|PAK1|PAK2|PAK3|PAK4|PAK6|PAK7|PARD6A|PARD6B|PLD1|ROCK1|TNK2|TRIP10|WAS|WASL	0.39	Plasma membrane-associated small GTPase which cycles between an active GTP-bound and an inactive GDP-bound state. In active state binds to a variety of effector proteins to regulate cellular responses. Involved in epithelial cell polarization processes. Regulates the bipolar attachment of spindle microtubules to kinetochores before chromosome congression in metaphase. Plays a role in the extensio…
AURKA	AURKA_HUMAN	10	BRCA1|HDAC6|INCENP|MBD3|NME1|TLK1|TLK2|TP53|TPX2|UBE2N	0.388	Mitotic serine/threonine kinases that contributes to the regulation of cell cycle progression. Associates with the centrosome and the spindle microtubules during mitosis and plays a critical role in various mitotic events including the establishment of mitotic spindle, centrosome duplication, centrosome separation as well as maturation, chromosomal alignment, spindle assembly checkpoint, and cyto…
TNFRSF13B	TR13B_HUMAN	6	CAMLG|TNFSF13|TNFSF13B|TRAF2|TRAF5|TRAF6	0.388	Receptor for TNFSF13/APRIL and TNFSF13B/TALL1/BAFF/BLYS that binds both ligands with similar high affinity. Mediates calcineurin-dependent activation of NF-AT, as well as activation of NF-kappa-B and AP-1. Involved in the stimulation of B- and T- cell function and the regulation of humoral immunity.
TGFB1I1	TGFI1_HUMAN	7	AR|GIT1|HSPB1|PTK2|PTK2B|PTPN12|SLC6A3	0.388	Functions as a molecular adapter coordinating multiple protein-protein interactions at the focal adhesion complex and in the nucleus. Links various intracellular signaling modules to plasma membrane receptors and regulates the Wnt and TGFB signaling pathways. May also regulate SLC6A3 and SLC6A4 targeting to the plasma membrane hence regulating their activity. In the nucleus, functions as a nuclea…
BCL10	BCL10_HUMAN	8	C9ORF89|CARD10|CARD11|CARD14|CARD9|IKBKG|MALT1|TRAF2	0.388	Promotes apoptosis, pro-caspase-9 maturation and activation of NF-kappa-B via NIK and IKK. May be an adapter protein between upstream TNFR1-TRADD-RIP complex and the downstream NIK-IKK-IKAP complex. Is a substrate for MALT1.
RPS6KB1	KS6B1_HUMAN	9	COASY|CSNK2B|EP300|GDI2P1|KAT2B|MTOR|POLDIP3|RBX1|RPTOR	0.388	Serine/threonine-protein kinase that acts downstream of mTOR signaling in response to growth factors and nutrients to promote cell proliferation, cell growth and cell cycle progression. Regulates protein synthesis through phosphorylation of EIF4B, RPS6 and EEF2K, and contributes to cell survival by repressing the pro-apoptotic function of BAD. Under conditions of nutrient depletion, the inactive …
SET	SET_HUMAN	12	ANP32A|CDK5R1|CHAF1A|CHRM2|CHRM3|GAPDH|HIST1H3A|KLF5|MLL|NR3C1|RAC1|SETBP1	0.386	Multitasking protein, involved in apoptosis, transcription, nucleosome assembly and histone chaperoning. Isoform 2 anti-apoptotic activity is mediated by inhibition of the GZMA-activated DNase, NME1. In the course of cytotoxic T- lymphocyte (CTL)-induced apoptosis, GZMA cleaves SET, disrupting its binding to NME1 and releasing NME1 inhibition. Isoform 1 and isoform 2 are potent inhibitors of prot…
E2F4	E2F4_HUMAN	5	ATAD2|HCFC1|NDN|RB1|SMAD3	0.386	Transcription activator that binds DNA cooperatively with DP proteins through the E2 recognition site, 5'-TTTC[CG]CGC- 3' found in the promoter region of a number of genes whose products are involved in cell cycle regulation or in DNA replication. The DRTF1/E2F complex functions in the control of cell-cycle progression from G1 to S phase. E2F4 binds with high affinity to RBL1 and RBL2. In some in…
PIN1	PIN1_HUMAN	19	ADARB1|CDC25C|CDC27|CSNK2A1|CSNK2A2|DAB2|FOXO4|JUN|KIF20B|MCL1|MYT1|NONO|PKMYT1|PLK1|SMAD2|SMAD3|SUPT5H|TP53|WEE1	0.384	Essential PPIase that regulates mitosis presumably by interacting with NIMA and attenuating its mitosis-promoting activity. Displays a preference for an acidic residue N-terminal to the isomerized proline bond. Catalyzes pSer/Thr-Pro cis/trans isomerizations. Down-regulates kinase activity of BTK. Can transactivate multiple oncogenes and induce centrosome amplification, chromosome instability and…
CHEK2	CHK2_HUMAN	8	ATM|BRCA1|MDC1|MSH2|MUS81|PLK1|PLK3|TP53	0.384	Serine/threonine-protein kinase which is required for checkpoint-mediated cell cycle arrest, activation of DNA repair and apoptosis in response to the presence of DNA double-strand breaks. May also negatively regulate cell cycle progression during unperturbed cell cycles. Following activation, phosphorylates numerous effectors preferentially at the consensus sequence [L-X- R-X-X-S/T]. Regulates c…
SHANK2	SHAN2_HUMAN	5	ARHGEF7|CTTN|DLGAP1|DNM2|SSTR2	0.384	Seems to be an adapter protein in the postsynaptic density (PSD) of excitatory synapses that interconnects receptors of the postsynaptic membrane including NMDA-type and metabotropic glutamate receptors, and the actin-based cytoskeleton. May play a role in the structural and functional organization of the dendritic spine and synaptic junction.
AKAP8	AKAP8_HUMAN	5	AMY1A|CCND3|DDX5|MCM2|PRKAR2A	0.384	Anchoring protein that mediates the subcellular compartmentation of cAMP-dependent protein kinase (PKA type II).
TERF1	TERF1_HUMAN	11	ATM|FBXO4|KPNB1|MAPRE1|NME1|PINX1|SALL1|SKP1|TINF2|TNKS|TNKS2	0.384	Binds the telomeric double-stranded TTAGGG repeat and negatively regulates telomere length. Involved in the regulation of the mitotic spindle. Component of the shelterin complex (telosome) that is involved in the regulation of telomere length and protection. Shelterin associates with arrays of double- stranded TTAGGG repeats added by telomerase and protects chromosome ends; without its protective…
RNF11	RNF11_HUMAN	7	SMURF2|STAMBP|UBC|UBE2D1|UBE2D2|UBE2D3|WWP1	0.384	Essential component of a ubiquitin-editing protein complex, comprising also TNFAIP3, ITCH and TAX1BP1, that ensures the transient nature of inflammatory signaling pathways. Promotes the association of TNFAIP3 to RIPK1 after TNF stimulation. TNFAIP3 deubiquitinates 'Lys-63' polyubiquitin chains on RIPK1 and catalyzes the formation of 'Lys-48'-polyubiquitin chains. This leads to RIPK1 proteasomal d…
ABI1	ABI1_HUMAN	5	ABL1|ENAH|EPS8|NCKAP1|SOS1	0.382	May act in negative regulation of cell growth and transformation by interacting with nonreceptor tyrosine kinases ABL1 and/or ABL2. May play a role in regulation of EGF-induced Erk pathway activation. Involved in cytoskeletal reorganization and EGFR signaling. Together with EPS8 participates in transduction of signals from Ras to Rac. In vitro, a trimeric complex of ABI1, EPS8 and SOS1 exhibits R…
ANK1	ANK1_HUMAN	5	OBSCN|RHAG|SPTB|TIAM1|TTN	0.382	Attaches integral membrane proteins to cytoskeletal elements; binds to the erythrocyte membrane protein band 4.2, to Na-K ATPase, to the lymphocyte membrane protein GP85, and to the cytoskeletal proteins fodrin, tubulin, vimentin and desmin. Erythrocyte ankyrins also link spectrin (beta chain) to the cytoplasmic domain of the erythrocytes anion exchange protein; they retain most or all of these b…
YY1	TYY1_HUMAN	25	ACTL6A|ATF6|CDKN2A|EP300|FKBP3|HCVGP1|HDAC1|HDAC2|HDAC3|HOXA11|ILF3|INO80|MDM2|MECP2|MYC|NOTCH1|NPM1|PRMT1|RUVBL1|RUVBL2|RYBP|SAP30|SMAD4|TFCP2|TP53	0.382	Multifunctional transcription factor that exhibits positive and negative control on a large number of cellular and viral genes by binding to sites overlapping the transcription start site. Binds to the consensus sequence 5'-CCGCCATNTT-3'; some genes have been shown to contain a longer binding motif allowing enhanced binding; the initial CG dinucleotide can be methylated greatly reducing the bindi…
EXO1	EXO1_HUMAN	6	ATM|MLH1|MSH2|YWHAB|YWHAE|YWHAZ	0.382	5'->3' double-stranded DNA exonuclease which may also possess a cryptic 3'->5' double-stranded DNA exonuclease activity. Functions in DNA mismatch repair (MMR) to excise mismatch- containing DNA tracts directed by strand breaks located either 5' or 3' to the mismatch. Also exhibits endonuclease activity against 5'-overhanging flap structures similar to those generated by displacement synthesis wh…
MAX	MAX_HUMAN	12	CEBPA|EP300|MNT|MSH2|MXD1|MXD3|MXD4|MXI1|MYC|MYCN|SPAG9|TEAD1	0.38	Transcription regulator. Forms a sequence-specific DNA- binding protein complex with MYC or MAD which recognizes the core sequence 5'-CAC[GA]TG-3'. The MYC-MAX complex is a transcriptional activator, whereas the MAD-MAX complex is a repressor. May repress transcription via the recruitment of a chromatin remodeling complex containing H3 'Lys-9' histone methyltransferase activity.
PIAS2	PIAS2_HUMAN	13	AR|CDKN2A|DNMT3A|GTF2I|GTF2IRD1|HUWE1|MBD1|MYCN|PARK7|SUMO1|TP53|TRIM27|UBE2I	0.38	Functions as an E3-type small ubiquitin-like modifier (SUMO) ligase, stabilizing the interaction between UBE2I and the substrate, and as a SUMO-tethering factor. Plays a crucial role as a transcriptional coregulator in various cellular pathways, including the STAT pathway, the p53 pathway and the steroid hormone signaling pathway. The effects of this transcriptional coregulation, transactivation …
RNF2	RING2_HUMAN	14	BMI1|HIST2H2AC|MBD1|PCGF1|PCGF2|PSMC4|RING1|TFCP2|UBE2D1|UBE2D2|UBE2K|UBE3A|USP11|USP7	0.38	E3 ubiquitin-protein ligase that mediates monoubiquitination of 'Lys-119' of histone H2A, thereby playing a central role in histone code and gene regulation. H2A 'Lys-119' ubiquitination gives a specific tag for epigenetic transcriptional repression and participates in X chromosome inactivation of female mammals. May be involved in the initiation of both imprinted and random X inactivation. Essen…
MBD3	MBD3_HUMAN	10	AURKA|BCL11B|GATAD2B|HDAC1|JUN|MBD2|MBD3L1|MBD3L2|MECOM|MTA2	0.378	Does not bind DNA by itself. Recruits histone deacetylases and DNA methyltransferases. Acts as transcriptional repressor and plays a role in gene silencing.
PABPC1	PABP1_HUMAN	7	ANAPC5|CNOT7|EIF4G1|GSPT2|PAIP1|PAIP2|PAN3	0.378	Binds the poly(A) tail of mRNA. May be involved in cytoplasmic regulatory processes of mRNA metabolism such as pre- mRNA splicing. Its function in translational initiation regulation can either be enhanced by PAIP1 or repressed by PAIP2. Can probably bind to cytoplasmic RNA sequences other than poly(A) in vivo. Involved in translationally coupled mRNA turnover. Implicated with other RNA-binding p…
CBX1	CBX1_HUMAN	6	C11ORF30|CBX3|CBX5|HIST1H3A|SUV420H2|TRIM28	0.378	Component of heterochromatin. Recognizes and binds histone H3 tails methylated at 'Lys-9', leading to epigenetic repression. Interaction with lamin B receptor (LBR) can contribute to the association of the heterochromatin with the inner nuclear membrane.
S100B	S100B_HUMAN	7	AHNAK|IQGAP1|PGM1|S100A1|S100A11|S100A6|VAV1	0.376	Weakly binds calcium but binds zinc very tightly- distinct binding sites with different affinities exist for both ions on each monomer. Physiological concentrations of potassium ion antagonize the binding of both divalent cations, especially affecting high-affinity calcium-binding sites. Binds to and initiates the activation of STK38 by releasing autoinhibitory intramolecular interactions within …
ESR1	ESR1_HUMAN	87	AKAP13|BAG1|BRCA1|CAV1|CCNC|CCND1|CDC25B|CEBPB|CITED1|COBRA1|CREBBP|DDX17|DDX5|DDX54|DNTTIP2|EP300|ESR2|FOXO1|GRIP1|GTF2H1|HDAC1|HDAC4|HSP90AA1|HSPA4|ISL1|JUN|KDM5A|KLF5|LCOR|LMO4|MAPK1|MED1|MED10|MED12|MED14|MED16|MED20|MED23|MED24|MED6|MEN1|MGMT|MNAT1|MSH2|MTA1|MTA2|MUC1|MVP|NCOA1|NCOA2|NCOA3|NCOA6|NCOR1|NCOR2|NGG1|NR0B2|NR2C1|NR2F1|NRIP1|NSD1|PHB2|POU4F1|POU4F2|PPARGC1B|PRDM2|PRMT2|RBM39|RELA|…	0.376	Nuclear hormone receptor. The steroid hormones and their receptors are involved in the regulation of eukaryotic gene expression and affect cellular proliferation and differentiation in target tissues. Ligand-dependent nuclear transactivation involves either direct homodimer binding to a palindromic estrogen response element (ERE) sequence or association with other DNA- binding transcription facto…
NXF1	NXF1_HUMAN	5	DHX9|ELAVL4|MAGOH|TNPO2|U2AF1	0.376	Involved in the nuclear export of mRNA species bearing retroviral constitutive transport elements (CTE) and in the export of mRNA from the nucleus to the cytoplasm. The NXF1-NXT1 heterodimer is involved in the export of HSP70 mRNA in conjunction with ALYREF/THOC4 and THOC5.
MDFI	MDFI_HUMAN	9	C9ORF86|GNAI2|IQUB|MYF5|MYOD1|MYOG|PGLS|SIX1|ZBTB25	0.374	Inhibits the transactivation activity of the Myod family of myogenic factors and represses myogenesis. Acts by associating with Myod family members and retaining them in the cytoplasm by masking their nuclear localization signals. Can also interfere with the DNA-binding activity of Myod family members. Plays an important role in trophoblast and chondrogenic differentiation. Regulates the transcri…
MBD2	MBD2_HUMAN	14	CHD3|GATAD2A|GATAD2B|GPN1|HDAC1|HDAC2|HINFP|MBD3|MBD3L1|MBD3L2|MTA2|PTK2B|SIN3A|TACC3	0.374	Binds CpG islands in promoters where the DNA is methylated at position 5 of cytosine within CpG dinucleotides. Binds hemi-methylated DNA as well. Recruits histone deacetylases and DNA methyltransferases. Acts as transcriptional repressor and plays a role in gene silencing. May enhance the activation of some unmethylated cAMP-responsive promoters.
RASSF1	RASF1_HUMAN	7	CDC20|CNKSR1|DAXX|HRAS|MAP1B|MAP1S|RASSF5	0.374	Potential tumor suppressor. Required for death receptor- dependent apoptosis. Mediates activation of STK3/MST2 and STK4/MST1 during Fas-induced apoptosis by preventing their dephosphorylation. When associated with MOAP1, promotes BAX conformational change and translocation to mitochondrial membranes in response to TNF and TNFSF10 stimulation. Isoform A interacts with CDC20, an activator of the an…
EPOR	EPOR_HUMAN	10	CISH|CRKL|EPO|JAK2|LYN|PIK3R1|PTPN6|SOCS2|SOCS3|STAT5A	0.374	Receptor for erythropoietin. Mediates erythropoietin- induced erythroblast proliferation and differentiation. Upon EPO stimulation, EPOR dimerizes triggering the JAK2/STAT5 signaling cascade. In some cell types, can also activate STAT1 and STAT3. May also activate the LYN tyrosine kinase.
MLLT4	AFAD_HUMAN	13	BCR|EPHB3|F11R|HRAS|LMO2|PFN1|PVRL1|RAP1A|RAP1GAP|SORBS1|SSX2IP|TJP1|USP9X	0.374	Belongs to an adhesion system, probably together with the E-cadherin-catenin system, which plays a role in the organization of homotypic, interneuronal and heterotypic cell-cell adherens junctions (AJs). Nectin- and actin-filament-binding protein that connects nectin to the actin cytoskeleton.
CDKN1A	CDN1A_HUMAN	20	BCCIP|CCNB1|CCND1|CDK2|CIZ1|DTL|EP300|GADD45A|GADD45G|GAPDH|HDAC1|MDM2|MDM4|PARP1|PCNA|PIM1|RNF144B|TK1|TSG101|UBC	0.372	May be the important intermediate by which p53/TP53 mediates its role as an inhibitor of cellular proliferation in response to DNA damage. Binds to and inhibits cyclin-dependent kinase activity, preventing phosphorylation of critical cyclin- dependent kinase substrates and blocking cell cycle progression. Functions in the nuclear localization and assembly of cyclin D- CDK4 complex and promotes it…
NUP98	NUP98_HUMAN	5	CREBBP|HDAC1|NUP88|RAE1|TPR	0.37	Nup98 and Nup96 play a role in the bidirectional transport across the nucleoporin complex (NPC). The repeat domain in Nup98 has a direct role in the transport.
TSC2	TSC2_HUMAN	14	AKT1|FOXO1|GSK3B|MAPK1|PAM|PRKAA1|PTK2|RHEB|RPS6KA1|TBC1D7|TSC1|UBE3A|YWHAB|YWHAZ	0.37	In complex with TSC1, inhibits the nutrient-mediated or growth factor-stimulated phosphorylation of S6K1 and EIF4EBP1 by negatively regulating mTORC1 signaling. Acts as a GTPase- activating protein (GAP) for the small GTPase RHEB, a direct activator of the protein kinase activity of mTORC1. Implicated as a tumor suppressor. Involved in microtubule-mediated protein transport, but this seems to be …
JUND	JUND_HUMAN	5	ATF3|BRCA1|DDIT3|MAPK8|MEN1	0.37	Transcription factor binding AP-1 sites.
DAB2	DAB2_HUMAN	11	CDK1|CSK|DAB2IP|DVL2|DVL3|LRP2|MYO6|PIN1|SMAD2|SMAD3|SRC	0.368	Clathrin-associated sorting protein (CLASP) which can bind and assemble clathrin but also recruit cargo like the LDLR to clathrin-coated pits and regulate their endocytosis. Plays a role in the CSF-1 signal transduction pathway.
PEA15	PEA15_HUMAN	5	CASP8|FADD|MAPK1|PLD1|RPS6KA3	0.368	Blocks Ras-mediated inhibition of integrin activation and modulates the ERK MAP kinase cascade. Inhibits RPS6KA3 activities by retaining it in the cytoplasm (By similarity). Inhibits both TNFRSF6- and TNFRSF1A-mediated CASP8 activity and apoptosis. Regulates glucose transport by controlling both the content of SLC2A1 glucose transporters on the plasma membrane and the insulin-dependent traffickin…
GTF2F1	T2FA_HUMAN	6	CTDP1|PARP1|POLR2A|SRF|TAF1|TBP	0.368	TFIIF is a general transcription initiation factor that binds to RNA polymerase II and helps to recruit it to the initiation complex in collaboration with TFIIB. It promotes transcription elongation.
CPSF6	CPSF6_HUMAN	7	APBB1|ITCH|NEDD4|PLSCR1|TCERG1|WWOX|WWP1	0.368	Component of the cleavage factor Im complex (CFIm) that plays a key role in pre-mRNA 3'-processing. Involved in association with NUDT21/CPSF5 in pre-MRNA 3'-end poly(A) site cleavage and poly(A) addition. CPSF6 binds to cleavage and polyadenylation RNA substrates and promotes RNA looping.
CTTN	SRC8_HUMAN	9	ACTR3|CTNND1|FER|HDAC6|KCNA2|SHANK2|SIRT1|WASL|WIPF1	0.368	Contributes to the organization of the actin cytoskeleton and cell structure. Plays a role in the regulation of cell migration. Plays a role in the invasiveness of cancer cells, and the formation of metastases.
YBX1	YBOX1_HUMAN	8	ANKRD2|CTCF|HIST1H1C|IREB2|PCNA|RBBP6|SRSF9|TP53	0.366	Mediates pre-mRNA alternative splicing regulation. Binds to splice sites in pre-mRNA and regulates splice site selection. Binds and stabilizes cytoplasmic mRNA. Contributes to the regulation of translation by modulating the interaction between the mRNA and eukaryotic initiation factors (By similarity). Regulates the transcription of numerous genes. Its transcriptional activity on the multidrug re…
UBE2I	UBC9_HUMAN	40	AR|ATF2|BLM|BLMH|BRCA1|DACH1|DAXX|DNMT3A|DNMT3B|EGR2|ETS1|ETV6|FHIT|GCM1|GMEB1|GMEB2|HDAC4|HDAC7|HIPK2|MAP3K1|MDM2|MITF|NCOR1|PELI1|PIAS1|PIAS2|RANBP2|RANGAP1|SALL1|SP100|SREBF2|SUMO1|SUMO3|SUZ12|TCF3|TNFRSF1A|TOP1|TP53|UBA2|WT1	0.366	Accepts the ubiquitin-like proteins SUMO1, SUMO2, SUMO3 and SUMO4 from the UBLE1A-UBLE1B E1 complex and catalyzes their covalent attachment to other proteins with the help of an E3 ligase such as RANBP2 or CBX4. Can catalyze the formation of poly- SUMO chains. Necessary for sumoylation of FOXL2 and KAT5. Essential for nuclear architecture and chromosome segregation.
DAXX	DAXX_HUMAN	25	AR|ATRX|AXIN1|CDKN2A|CREBBP|ETS1|FAS|H3F3A|HDAC1|HDAC2|HIPK2|MCRS1|MDM2|NR3C1|PAX5|PLAGL1|PML|RASSF1|SLC2A4|SMAD4|STUB1|SUMO1|UBC|UBE2I|USP7	0.366	Transcription corepressor known to repress transcriptional potential of several sumoylated transcription factors. Acts as an adapter protein in a MDM2-DAXX-USP7 complex by regulating the RING-finger E3 ligase MDM2 ubiquitination activity. Under non-stress condition, in association with the deubiquitinating USP7, prevents MDM2 self-ubiquitination and enhances the intrinsic E3 ligase activity of MD…
RELA	TF65_HUMAN	51	AES|APBA2|ASCC1|ASCC2|ASCC3|ATF3|BRCA1|BRMS1|CARM1|CDK9|CEBPB|COMMD1|CREBBP|CSNK2A1|CSNK2A2|DHX9|EP300|ESR1|ETHE1|FUS|HDAC1|HDAC2|ING4|KDM2A|MEN1|MTPN|NCF1|NCOR2|NFKB1|NFKB2|NFKBIA|NFKBIB|NFKBIE|NR3C1|PARP1|PIAS3|POU2F1|PPP1R13L|PRKCZ|PRMT1|PSMD10|REL|RFC1|RNF25|SETD7|SIRT6|SP1|STAT3|TBK1|TBP|UBC	0.366	NF-kappa-B is a pleiotropic transcription factor present in almost all cell types and is the endpoint of a series of signal transduction events that are initiated by a vast array of stimuli related to many biological processes such as inflammation, immunity, differentiation, cell growth, tumorigenesis and apoptosis. NF-kappa-B is a homo- or heterodimeric complex formed by the Rel-like domain-cont…
NOS1AP	CAPON_HUMAN	5	LRP1|LRP2|NOS1|RASD1|SYN1	0.366	Adapter protein involved in neuronal nitric-oxide (NO) synthesis regulation via its association with nNOS/NOS1. The complex formed with NOS1 and synapsins is necessary for specific NO and synapsin functions at a presynaptic level. Mediates an indirect interaction between NOS1 and RASD1 leading to enhance the ability of NOS1 to activate RASD1. Competes with DLG4 for interaction with NOS1, possibly…
BAD	BAD_HUMAN	8	BCL2|BCL2A1|BCL2L1|BCL2L2|MCL1|S100A10|YWHAQ|YWHAZ	0.364	Promotes cell death. Successfully competes for the binding to Bcl-X(L), Bcl-2 and Bcl-W, thereby affecting the level of heterodimerization of these proteins with BAX. Can reverse the death repressor activity of Bcl-X(L), but not that of Bcl-2 (By similarity). Appears to act as a link between growth factor receptor signaling and the apoptotic pathways.
ATF3	ATF3_HUMAN	7	CREBBP|DDIT3|JUN|JUND|RELA|SMAD3|TP53	0.362	This protein binds the cAMP response element (CRE) (consensus: 5'-GTGACGT[AC][AG]-3'), a sequence present in many viral and cellular promoters. Represses transcription from promoters with ATF sites. It may repress transcription by stabilizing the binding of inhibitory cofactors at the promoter. Isoform 2 activates transcription presumably by sequestering inhibitory cofactors away from the promote…
PIAS3	PIAS3_HUMAN	9	GFI1|HMGA2|MITF|RELA|SMAD2|SMAD3|SMAD4|TRIM27|ZMIZ2	0.362	Functions as an E3-type small ubiquitin-like modifier (SUMO) ligase, stabilizing the interaction between UBE2I and the substrate, and as a SUMO-tethering factor. Plays a crucial role as a transcriptional coregulation in various cellular pathways, including the STAT pathway and the steroid hormone signaling pathway. Involved in regulating STAT3 signaling via inhibiting STAT3 DNA-binding and suppre…
SERTAD1	SRTD1_HUMAN	5	CDKN2A|CREBBP|KAT2B|SUPT7L|TRIM28	0.362	Acts at E2F-responsive promoters to integrate signals provided by PHD- and/or bromodomain-containing transcription factors. Stimulates E2F-1/DP-1 transcriptional activity. Renders the activity of cyclin D1/CDK4 resistant to the inhibitory effects of p16(INK4a).
SIAH1	SIAH1_HUMAN	19	APC|BAG1|CACYBP|DAB1|EEF1D|HIPK2|KHDRBS3|KIF22|NUMB|PEG10|PEG3|PHC2|PIAS1|PKD1|POU2AF1|RBBP8|SNCAIP|TRIB3|UBE2E2	0.362	E3 ubiquitin-protein ligase that mediates ubiquitination and subsequent proteasomal degradation of target proteins. E3 ubiquitin ligases accept ubiquitin from an E2 ubiquitin- conjugating enzyme in the form of a thioester and then directly transfers the ubiquitin to targeted substrates. Mediates E3 ubiquitin ligase activity either through direct binding to substrates or by functioning as the esse…
CCNE1	CCNE1_HUMAN	5	CDC25A|CDK2|CUL3|FBXW7|HERC5	0.36	Essential for the control of the cell cycle at the G1/S (start) transition.
LAT	LAT_HUMAN	8	GRAP|GRAP2|GRB2|ITK|PIK3R1|PLCG1|SH3BP2|VAV1	0.36	Required for TCR (T-cell antigen receptor)- and pre-TCR- mediated signaling, both in mature T-cells and during their development. Involved in FCGR3 (low affinity immunoglobulin gamma Fc region receptor III)-mediated signaling in natural killer cells and FCER1 (high affinity immunoglobulin epsilon receptor)-mediated signaling in mast cells. Couples activation of these receptors and their associate…
FOS	FOS_HUMAN	17	BCL3|CARM1|COBRA1|CSNK2A1|CSNK2A2|DDIT3|JUN|MAZ|NCOA1|NCOA2|NCOA3|NCOR2|RUNX1|RUNX2|SMAD3|TBP|UBR1	0.36	Nuclear phosphoprotein which forms a tight but non- covalently linked complex with the JUN/AP-1 transcription factor. In the heterodimer, FOS and JUN/AP-1 basic regions each seems to interact with symmetrical DNA half sites. On TGF-beta activation, forms a multimeric SMAD3/SMAD4/JUN/FOS complex at the AP1/SMAD- binding site to regulate TGF-beta-mediated signaling. Has a critical function in regul…
E2F1	E2F1_HUMAN	26	ARID3A|ATAD2|CCNA1|CCNA2|CUL1|GTF2H1|HCFC1|MDM4|NCOA6|NDN|NDNL2|NFKB1|NPDC1|NRIP1|PHB|RB1|RBL1|SKP2|SP1|SP2|SP3|SP4|TFDP1|TOPBP1|TP53BP1|YWHAQ	0.36	Transcription activator that binds DNA cooperatively with DP proteins through the E2 recognition site, 5'-TTTC[CG]CGC- 3' found in the promoter region of a number of genes whose products are involved in cell cycle regulation or in DNA replication. The DRTF1/E2F complex functions in the control of cell-cycle progression from G1 to S phase. E2F1 binds preferentially RB1 in a cell-cycle dependent ma…
BAG1	BAG1_HUMAN	10	AR|ESR1|HBEGF|HSPA8|MAPT|PPP1R15A|RAF1|RARA|SIAH1|STUB1	0.36	Inhibits the chaperone activity of HSP70/HSC70 by promoting substrate release. Inhibits the pro-apoptotic function of PPP1R15A, and has anti-apoptotic activity. Markedly increases the anti-cell death function of BCL2 induced by various stimuli.
SKIL	SKIL_HUMAN	7	CPNE4|NCOR1|NCOR2|RNF111|SIN3A|SKI|SMAD3	0.36	May have regulatory role in cell division or differentiation in response to extracellular signals.
SATB1	SATB1_HUMAN	8	CTBP1|CTNNB1|CUX1|KAT2B|PIAS1|PML|POLR2J|TAT	0.36	Crucial silencing factor contributing to the initiation of X inactivation mediated by Xist RNA that occurs during embryogenesis and in lymphoma (By similarity). Binds to DNA at special AT-rich sequences, the consensus SATB1-binding sequence (CSBS), at nuclear matrix- or scaffold-associated regions. Thought to recognize the sugar-phosphate structure of double-stranded DNA. Transcriptional represso…
FRS2	FRS2_HUMAN	6	CBL|FGFR1|GRB2|NTRK1|PRKCI|PTPN11	0.358	Adapter protein that links activated FGR and NGF receptors to downstream signaling pathways. Plays an important role in the activation of MAP kinases and in the phosphorylation of PIK3R1, the regulatory subunit of phosphatidylinositol 3- kinase, in response to ligand-mediated activation of FGFR1. Modulates signaling via SHC1 by competing for a common binding site on NTRK1.
IRF5	IRF5_HUMAN	5	CREBBP|EP300|HDAC1|NCOR2|SIN3A	0.358	Transcription factor involved in the induction of interferons IFNA and INFB and inflammatory cytokines upon virus infection. Activated by TLR7 or TLR8 signaling.
GGA1	GGA1_HUMAN	7	ARF3|BACE2|M6PR|RABEP1|SORL1|SORT1|VPS18	0.358	Plays a role in protein sorting and trafficking between the trans-Golgi network (TGN) and endosomes. Mediates the ARF- dependent recruitment of clathrin to the TGN and binds ubiquitinated proteins and membrane cargo molecules with a cytosolic acidic cluster-dileucine (AC-LL) motif.
NONO	NONO_HUMAN	7	AR|CPNE4|PIN1|SFPQ|SMARCA4|SMARCD1|SPI1	0.358	DNA- and RNA binding protein, involved in several nuclear processes. Binds the conventional octamer sequence in double stranded DNA. Also binds single-stranded DNA and RNA at a site independent of the duplex site (By similarity). Involved in pre-mRNA splicing, probably as an heterodimer with SFPQ. Interacts with U5 snRNA, probably by binding to a purine-rich sequence located on the 3' side of U5 …
MDM2	MDM2_HUMAN	57	ABL1|AKT1|APEX1|ARRB1|ARRB2|BAIAP2L1|BANP|CCNG1|CDH1|CDKN1A|CDKN2A|COPS5|CTBP1|CTBP2|DAXX|DHFR|EP300|FKBP3|FOXO4|G3BP2|GNL3|HDAC1|HIF1A|HIST2H2BE|HIST3H3|IGF1R|KAT2B|KAT5|MDM4|MTBP|NCL|NUMB|PML|PSMD10|PSME3|RAD23A|RB1|RPL11|RPL23|RPL26|RPL5|RPS27|RPS27A|RPS27L|RRM2B|RYBP|SFN|TAF1|TAT|TERT|TP53|TP73|UBC|UBE2I|UBE4B|USP7|YY1	0.356	E3 ubiquitin-protein ligase that mediates ubiquitination of p53/TP53, leading to its degradation by the proteasome. Inhibits p53/TP53- and p73/TP73-mediated cell cycle arrest and apoptosis by binding its transcriptional activation domain. Also acts as an ubiquitin ligase E3 toward itself and ARRB1. Permits the nuclear export of p53/TP53. Promotes proteasome-dependent ubiquitin-independent degrada…
WAS	WASP_HUMAN	12	CDC42|CRKL|FGR|FYN|GRB2|ITSN2|NCK1|PIK3R1|PSTPIP1|SRC|TRIP10|WIPF1	0.356	Effector protein for Rho-type GTPases. Regulates actin filament reorganization via its interaction with the Arp2/3 complex. Important for efficient actin polymerization. Possible regulator of lymphocyte and platelet function. Mediates actin filament reorganization and the formation of actin pedestals upon infection by pathogenic bacteria.
TP53BP1	TP53B_HUMAN	8	ATM|DYNLL1|E2F1|H2AFX|MDC1|PAXIP1|RAD18|TP53	0.356	Plays a key role in the response to DNA damage. May have a role in checkpoint signaling during mitosis. Enhances TP53- mediated transcriptional activation.
CASK	CSKP_HUMAN	12	APBA1|DLG1|DLG4|F11R|ID1|LIN7A|NPHS1|PARK2|RPH3A|SDC2|TBR1|TSPYL2	0.356	Multidomain scaffolding protein with a role in synaptic transmembrane protein anchoring and ion channel trafficking. Contributes to neural development and regulation of gene expression via interaction with the transcription factor TRB1. Binds to cell-surface proteins, including amyloid precursor protein, neurexins and syndecans. May mediate a link between the extracellular matrix and the actin cy…
GATA4	GATA4_HUMAN	9	CDK9|HAND2|ID1|ID2|ID3|NKX2-5|SP1|SRF|ZFPM2	0.356	Transcriptional activator. Binds to the consensus sequence 5'-AGATAG-3'. Acts as a transcriptional activator of ANF in cooperation with NKX2-5 (By similarity). Promotes cardiac myocyte enlargement.
WASL	WASL_HUMAN	6	CDC42|CTTN|GRB2|NCK1|PFN1|RHOQ	0.354	Regulates actin polymerization by stimulating the actin- nucleating activity of the Arp2/3 complex. Binds to HSF1/HSTF1 and forms a complex on heat shock promoter elements (HSE) that negatively regulates HSP90 expression.
NRIP1	NRIP1_HUMAN	13	AHR|CTBP1|CTBP2|E2F1|ESR1|HDAC3|NR0B1|NR3C1|NR5A1|PPARA|PPARG|PRMT1|RARA	0.354	Modulates transcriptional activation by steroid receptors such as NR3C1, NR3C2 and ESR1. Also modulates transcriptional repression by nuclear hormone receptors.
EGR1	EGR1_HUMAN	6	CEBPB|CREBBP|EP300|NAB1|PSMA3|TP53	0.354	Transcriptional regulator. Recognizes and binds to the DNA sequence 5'-CGCCCCCGC-3'(EGR-site). Activates the transcription of target genes whose products are required for mitogenesis and differentiation.
ORC2L	-	10	CDC6|DBF4|MCM10|MCM2|ORC1L|ORC3L|ORC4L|ORC5L|ORC6L|TERF2	0.354	-
KHDRBS1	KHDR1_HUMAN	17	CREBBP|DHX9|FYN|GRB2|HNRNPK|ITK|NCK1|PIK3R1|PLCG1|PRMT1|PTK6|RAPSN|RASA1|SMARCA2|SRC|WBP4|YTHDC1	0.354	Recruited and tyrosine phosphorylated by several receptor systems, for example the T-cell, leptin and insulin receptors. Once phosphorylated, functions as an adapter protein in signal transduction cascades by binding to SH2 and SH3 domain- containing proteins. Role in G2-M progression in the cell cycle. Represses CBP-dependent transcriptional activation apparently by competing with other nuclear …
BCOR	BCOR_HUMAN	5	BCL6|CPNE4|MLLT3|PCGF1|SP1	0.354	Transcriptional corepressor. May specifically inhibit gene expression when recruited to promoter regions by sequence specific DNA-binding proteins such as BCL6 and MLLT3. This repression may be mediated at least in part by histone deacetylase activities which can associate with this corepressor. Involved in the repression of TFAP2A; impairs binding of BCL6 and KDM2B to TFAP2A promoter regions. Vi…
BAIAP2	BAIP2_HUMAN	6	ATN1|CDC42|EPS8|SHANK1|WASF1|WASF2	0.354	Adapter protein that links membrane-bound small G- proteins to cytoplasmic effector proteins. Necessary for CDC42- mediated reorganization of the actin cytoskeleton and for RAC1- mediated membrane ruffling. Involved in the regulation of the actin cytoskeleton by WASF family members and the Arp2/3 complex. Plays a role in neurite growth. Acts syngeristically with ENAH to promote filipodia formatio…
MEF2D	MEF2D_HUMAN	6	CABIN1|HDAC3|MAPK7|NFATC2|SP1|YWHAQ	0.352	Transcriptional activator which binds specifically to the MEF2 element, 5'-YTA[AT](4)TAR-3', found in numerous muscle- specific, growth factor- and stress-induced genes. Mediates cellular functions not only in skeletal and cardiac muscle development, but also in neuronal differentiation and survival. Plays diverse roles in the control of cell growth, survival and apoptosis via p38 MAPK signaling …
RBBP8	COM1_HUMAN	7	ATM|BRCA1|CTBP1|LMO4|RB1|RBL2|SIAH1	0.352	Endonuclease that cooperates with the MRE11-RAD50-NBN (MRN) complex in processing meiotic and mitotic double-strand breaks (DSBs) by ensuring both resection and intrachromosomal association of the broken ends. Functions downstream of the MRN complex and ATM, promotes ATR activation and its recruitment to DSBs in the S/G2 phase facilitating the generation of ssDNA. Component of the BRCA1-RBBP8 com…
TCF4	ITF2_HUMAN	6	AR|ASCL1|CTNNB1|ID3|MEN1|TAL1	0.352	Transcription factor that binds to the immunoglobulin enchancer Mu-E5/KE5-motif. Involved in the initiation of neuronal differentiation. Activates transcription by binding to the E box (5'-CANNTG-3'). Binds to the E-box present in the somatostatin receptor 2 initiator element (SSTR2-INR) to activate transcription (By similarity). Preferentially binds to either 5'-ACANNTGT-3' or 5'-CCANNTGG-3'.
FOXO1	FOXO1_HUMAN	9	AR|CREBBP|ESR1|HNF4A|PARP1|SIRT2|SKP2|TSC2|UBC	0.352	Transcription factor that is the main target of insulin signaling and regulates metabolic homeostasis in response to oxidative stress. Binds to the insulin response element (IRE) with consensus sequence 5'-TT[G/A]TTTTG-3' and the related Daf-16 family binding element (DBE) with consensus sequence 5'- TT[G/A]TTTAC-3'. Activity suppressed by insulin. Main regulator of redox balance and osteoblast n…
FMR1	FMR1_HUMAN	6	CYFIP1|CYFIP2|FXR1|FXR2|NUFIP1|NUFIP2	0.35	Translation repressor. Component of the CYFIP1-EIF4E- FMR1 complex which binds to the mRNA cap and mediates translational repression. In the CYFIP1-EIF4E-FMR1 complex this subunit mediates translation repression (By similarity). RNA- binding protein that plays a role in intracellular RNA transport and in the regulation of translation of target mRNAs. Associated with polysomes. May play a role in …
GGA2	GGA2_HUMAN	5	BACE2|RABEP1|SORL1|SORT1|VPS18	0.35	Plays a role in protein sorting and trafficking between the trans-Golgi network (TGN) and endosomes. Mediates the ARF- dependent recruitment of clathrin to the TGN and binds ubiquitinated proteins and membrane cargo molecules with a cytosolic acidic cluster-dileucine (AC-LL) motif.
SMARCD1	SMRD1_HUMAN	5	DPF2|FEZ1|NONO|NR3C1|SMARCE1	0.348	Involved in chromatin remodeling. Belongs to the neural progenitors-specific chromatin remodeling complex (npBAF complex) and the neuron-specific chromatin remodeling complex (nBAF complex). During neural development a switch from a stem/progenitor to a post-mitotic chromatin remodeling mechanism occurs as neurons exit the cell cycle and become committed to their adult state. The transition from …
MYC	MYC_HUMAN	54	ATAD2|BRCA1|BTRC|CCNT1|CDCA7L|CDK9|CREB1|DNMT3A|EP300|EP400|FBXW7|FBXW8|GCN1L1|GSK3A|GTF2I|HBP1|HDAC1|HUWE1|KAT2A|KAT2B|KAT5|KIAA1967|MAPK1|MAPK8|MAX|MCM7|MEN1|MLH1|MYCBP|MYCBP2|NFYB|NFYC|NMI|PARP10|PFDN5|POLR2A|RAF1|RUVBL1|SKP2|SMAD2|SMAD3|SMARCA4|SMARCB1|SMARCC1|SUPT3H|TAF9|TFAP2A|TIAM1|TP73|TRIP12|TRRAP|YY1|ZBTB17|ZNF281	0.348	Participates in the regulation of gene transcription. Binds DNA in a non-specific manner, yet also specifically recognizes the core sequence 5'-CAC[GA]TG-3'. Seems to activate the transcription of growth-related genes.
SUZ12	SUZ12_HUMAN	5	CTCF|EED|EZH2|UBE2I|WDR77	0.346	Polycomb group (PcG) protein. Component of the PRC2/EED- EZH2 complex, which methylates 'Lys-9' (H3K9me) and 'Lys-27' (H3K27me) of histone H3, leading to transcriptional repression of the affected target gene. The PRC2/EED-EZH2 complex may also serve as a recruiting platform for DNA methyltransferases, thereby linking two epigenetic repression systems. Genes repressed by the PRC2/EED-EZH2 complex…
MORF4L1	MO4L1_HUMAN	5	MRFAP1|PALB2|PFN2|PHF12|RB1	0.346	Component of the NuA4 histone acetyltransferase (HAT) complex which is involved in transcriptional activation of select genes principally by acetylation of nucleosomal histones H4 and H2A. This modification may both alter nucleosome - DNA interactions and promote interaction of the modified histones with other proteins which positively regulate transcription. This complex may be required for the …
CRYAB	CRYAB_HUMAN	6	CCND1|CRYAA|CRYBB2|CRYGC|HSPB1|PSMA3	0.344	May contribute to the transparency and refractive index of the lens. Has chaperone-like activity, preventing aggregation of various proteins under a wide range of stress conditions.
SH3KBP1	SH3K1_HUMAN	10	ARHGAP27|BLNK|CBLB|MAP3K4|PAK2|SH3GL2|SH3GL3|SH3GLB2|SYNJ1|UBC	0.344	Adapter protein involved in regulating diverse signal transduction pathways. Involved in the regulation of endocytosis and lysosomal degradation of ligand-induced receptor tyrosine kinases, including EGFR and MET/hepatocyte growth factor receptor, through a association with CBL and endophilins. The association with CBL, and thus the receptor internalization, may inhibited by an interaction with P…
MBD4	MBD4_HUMAN	5	FADD|HDAC1|MLH1|SIN3A|TRIM27	0.344	Mismatch-specific DNA N-glycosylase involved in DNA repair. Has thymine glycosylase activity and is specific for G:T mismatches within methylated and unmethylated CpG sites. Can also remove uracil or 5-fluorouracil in G:U mismatches. Has no lyase activity. Was first identified as methyl-CpG-binding protein.
YAP1	YAP1_HUMAN	6	ERBB4|SLC9A3R1|SMAD7|TP53BP2|TP73|WBP1	0.344	Transcriptional regulator which can act both as a coactivator and a corepressor and is the critical downstream regulatory target in the Hippo signaling pathway that plays a pivotal role in organ size control and tumor suppression by restricting proliferation and promoting apoptosis. The core of this pathway is composed of a kinase cascade wherein STK3/MST2 and STK4/MST1, in complex with its regul…
MYBL2	MYBB_HUMAN	8	CCNA1|CCND1|CDK9|CDKN1C|EP300|PARP1|RBL1|ZNF622	0.342	Transcription factor involved in the regulation of cell survival, proliferation, and differentiation. Transactivates the expression of the CLU gene.
DPF2	REQU_HUMAN	6	ESRRA|RELB|SMARCA2|SMARCA4|SMARCB1|SMARCD1	0.342	May be a transcription factor required for the apoptosis response following survival factor withdrawal from myeloid cells. Might also have a role in the development and maturation of lymphoid cells.
SYTL4	SYTL4_HUMAN	5	RAB27A|RAB27B|RAB3A|RAB8A|STX1A	0.342	Modulates exocytosis of dense-core granules and secretion of hormones in the pancreas and the pituitary. Interacts with vesicles containing negatively charged phospholipids in a Ca(2+)-independent manner (By similarity).
PAX3	PAX3_HUMAN	9	CBX3|CBX5|CIB1|HDAC10|MEOX1|MEOX2|RAD23B|SOX10|TRIM28	0.342	Probable transcription factor associated with development of alveolar rhabdomyosarcoma.
CEBPB	CEBPB_HUMAN	18	ATF2|CARM1|CREB1|DDIT3|EGR1|EP300|ESR1|HMGA1|HSF1|KAT2A|KAT2B|MED23|NCOR2|NR3C1|RELA|SMARCA2|SRF|TRIM28	0.342	Important transcriptional activator in the regulation of genes involved in immune and inflammatory responses. Specifically binds to an IL-1 response element in the IL-6 gene. NF-IL6 also binds to regulatory regions of several acute-phase and cytokines genes. It probably plays a role in the regulation of acute-phase reaction, inflammation and hemopoiesis. The consensus recognition site is 5'-T[TG]…
PAK1	PAK1_HUMAN	13	ARHGEF2|ARHGEF7|ARPC1B|BMX|CDC42|CDK11A|CDK5|DYNLL1|LIMK1|NCK1|PAK1IP1|RAC1|RAF1	0.34	The activated kinase acts on a variety of targets. Likely to be the GTPase effector that links the Rho-related GTPases to the JNK MAP kinase pathway. Activated by CDC42 and RAC1. Involved in dissolution of stress fibers and reorganization of focal complexes. Involved in regulation of microtubule biogenesis through phosphorylation of TBCB. DVL1 and PAK1 form a ternary complex with MUSK which is im…
DEDD	DEDD_HUMAN	5	CASP8|CFLAR|DEDD2|FADD|GTF3C3	0.34	A scaffold protein that directs CASP3 to certain substrates and facilitates their ordered degradation during apoptosis. May also play a role in mediating CASP3 cleavage of KRT18. Regulates degradation of intermediate filaments during apoptosis. May play a role in the general transcription machinery in the nucleus and might be an important regulator of the activity of GTF3C3. Inhibits DNA transcri…
RUNX2	RUNX2_HUMAN	7	FOS|HDAC3|HDAC7|JUN|MYST4|SMAD3|STUB1	0.34	Transcription factor involved in osteoblastic differentiation and skeletal morphogenesis. Essential for the maturation of osteoblasts and both intramembranous and endochondral ossification. CBF binds to the core site, 5'- PYGPYGGT-3', of a number of enhancers and promoters, including murine leukemia virus, polyomavirus enhancer, T-cell receptor enhancers, osteocalcin, osteopontin, bone sialoprote…
GATA2	GATA2_HUMAN	6	LMO2|MED1|PML|POU1F1|SPI1|ZBTB16	0.34	Transcriptional activator which regulates endothelin-1 gene expression in endothelial cells. Binds to the consensus sequence 5'-AGATAG-3'.
CLNS1A	ICLN_HUMAN	6	ITGA2B|LSM10|LSM11|PRMT5|SNRPD1|SNRPD3	0.34	The interaction with Sm proteins inhibits their assembly on U RNA and interferes with snRNP biogenesis. Inhibits the binding of survival motor neuron protein (SMN) to Sm proteins. May participate in cellular volume control by activation of a swelling-induced chloride conductance pathway.
ETS2	ETS2_HUMAN	6	CDK10|CREBBP|EP300|ERG|JUN|ZMYND11	0.338	-
TFAP2A	AP2A_HUMAN	6	APC|CITED2|EP300|MYC|NPM1|TP53	0.338	Sequence-specific DNA-binding protein that interacts with inducible viral and cellular enhancer elements to regulate transcription of selected genes. AP-2 factors bind to the consensus sequence 5'-GCCNNNGGC-3' and activate genes involved in a large spectrum of important biological functions including proper eye, face, body wall, limb and neural tube development. They also suppress a number of gen…
BACH1	BACH1_HUMAN	5	BRCA1|HMMR|MAFK|RBCK1|TP53	0.338	Transcriptional regulator that acts as repressor or activator. Binds, in vitro, to NF-E2 binding sites. Play important roles in coordinating transcription activation and repression by MAFK.
NCOA2	NCOA2_HUMAN	13	AR|ARNT|BRCA1|CARM1|CREBBP|DDX17|ESR1|FOS|NR3C1|PPARG|PPFIA4|RARA|VDR	0.338	Transcriptional coactivator for steroid receptors and nuclear receptors. Coactivator of the steroid binding domain (AF- 2) but not of the modulating N-terminal domain (AF-1). Required with NCOA1 to control energy balance between white and brown adipose tissues.
CDC25C	MPIP3_HUMAN	9	CHEK1|MAPK1|MAPK14|MAPK3|NEDD4|PCNA|PIN1|PLK3|UBC	0.336	Functions as a dosage-dependent inducer in mitotic control. Tyrosine protein phosphatase required for progression of the cell cycle. When phosphorylated, highly effective in activating G2 cells into prophase. Directly dephosphorylates CDK1 and activates its kinase activity.
RUNX1	RUNX1_HUMAN	10	ELF4|FOS|HIPK2|JUN|MYOD1|MYST3|STUB1|SUV39H1|TLE1|VDR	0.336	CBF binds to the core site, 5'-PYGPYGGT-3', of a number of enhancers and promoters, including murine leukemia virus, polyomavirus enhancer, T-cell receptor enhancers, LCK, IL-3 and GM-CSF promoters. The alpha subunit binds DNA and appears to have a role in the development of normal hematopoiesis. Isoform AML-1L interferes with the transactivation activity of RUNX1. Acts synergistically with ELF4 …
TAF8	TAF8_HUMAN	6	SUPT7L|TAF10|TAF4|TAF5|TAF6|TBP	0.336	Transcription factor TFIID is one of the general factors required for accurate and regulated initiation by RNA polymerase II. Mediates both basal and activator-dependent transcription. Plays a role in the differentiation of preadipocyte fibroblasts to adipocytes, however, does not seem to play a role in differentiation of myoblasts. Required for the integration of TAF10 in the TAF complex. May be…
TJP1	ZO1_HUMAN	9	F11R|GJA1|GJA3|GJA8|GJD3|KIRREL|MLLT4|OCLN|TJP2	0.336	The N-terminal may be involved in transducing a signal required for tight junction assembly, while the C-terminal may have specific properties of tight junctions. The alpha domain might be involved in stabilizing junctions. Plays a role in the regulation of cell migration by targeting CDC42BPB to the leading edge of migrating cells.
TRIP10	CIP4_HUMAN	7	AKAP9|ARHGAP17|CDC42|HTT|RHOQ|STAT3|WAS	0.336	Required for translocation of GLUT4 to the plasma membrane in response to insulin signaling (By similarity). Required to coordinate membrane tubulation with reorganization of the actin cytoskeleton during endocytosis. Binds to lipids such as phosphatidylinositol 4,5-bisphosphate and phosphatidylserine and promotes membrane invagination and the formation of tubules. Also promotes CDC42-induced act…
SMARCE1	SMCE1_HUMAN	7	ESR1|NCOA1|RCOR1|SMARCB1|SMARCC1|SMARCC2|SMARCD1	0.336	Involved in transcriptional activation and repression of select genes by chromatin remodeling (alteration of DNA-nucleosome topology). Belongs to the neural progenitors-specific chromatin remodeling complex (npBAF complex) and the neuron-specific chromatin remodeling complex (nBAF complex). During neural development a switch from a stem/progenitor to a post-mitotic chromatin remodeling mechanism …
ETS1	ETS1_HUMAN	5	CREBBP|DAXX|EP300|TDP2|UBE2I	0.334	Transcription factor.
DMAP1	DMAP1_HUMAN	6	C19ORF2|DNMT1|HDAC1|ING1|MNAT1|RGS6	0.334	Involved in transcription repression and activation. Its interaction with HDAC2 may provide a mechanism for histone deacetylation in heterochromatin following replication of DNA at late firing origins. Can also repress transcription independently of histone deacetylase activity. May specifically potentiate DAXX- mediated repression of glucocorticoid receptor-dependent transcription. Component of …
MXD1	MAD1_HUMAN	6	AKT1|HDAC2|MAX|SIN3A|SIN3B|SMC3	0.334	Transcriptional repressor. MAD binds with MAX to form a sequence-specific DNA-binding protein complex which recognizes the core sequence 5'-CAC[GA]TG-3'. MAD thus antagonizes MYC transcriptional activity by competing for MAX.
WAC	WAC_HUMAN	6	CTD|POLR2A|RNF20|RNF40|VCP|VCPIP1	0.334	Acts as a linker between gene transcription and histone H2B monoubiquitination at 'Lys-120' (H2BK120ub1). Interacts with the RNA polymerase II transcriptional machinery via its WW domain and with RNF20-RNF40 via its coiled coil region, thereby linking and regulating H2BK120ub1 and gene transcription. Regulates the cell-cycle checkpoint activation in response to DNA damage. Positive regulator of a…
HNF1A	HNF1A_HUMAN	7	CREBBP|EP300|KAT2B|PCBD1|RAC3|SIRT1|SRC	0.332	Transcriptional activator that regulates the tissue specific expression of multiple genes, especially in pancreatic islet cells and in liver. Required for the expression of several liver specific genes. Binds to the inverted palindrome 5'- GTTAATNATTAAC-3'.
CDK5	CDK5_HUMAN	5	LMTK2|NES|PAK1|PARK2|TP53	0.332	Proline-directed serine/threonine-protein kinase essential for neuronal cell cycle arrest and differentiation and may be involved in apoptotic cell death in neuronal diseases by triggering abortive cell cycle re-entry. Interacts with D1 and D3- type G1 cyclins. Phosphorylates SRC, NOS3, VIM/vimentin, p35/CDK5R1, MEF2A, SIPA1L1, SH3GLB1, PXN, PAK1, MCAM/MUC18, SEPT5, SYN1, DNM1, AMPH, SYNJ1, CDK16…
GAB2	GAB2_HUMAN	6	AKT1|ARHGAP32|CRKL|GRB2|PIK3R1|PTPN11	0.332	Adapter protein which acts downstream of several membrane receptors including cytokine, antigen, hormone, cell matrix and growth factor receptors to regulate multiple signaling pathways. Regulates osteoclast differentiation mediating the TNFRSF11A/RANK signaling. In allergic response, it plays a role in mast cells activation and degranulation through PI-3-kinase regulation. Also involved in the r…
GPS2	GPS2_HUMAN	6	C21ORF7|CCNA1|EP300|NCOR1|TBL1X|TP53	0.332	Suppresses G-protein- and mitogen-activated protein kinase-mediated signal transduction.
DAB1	DAB1_HUMAN	5	APLP1|LDLR|LRP1|LRP2|SIAH1	0.33	Adapter molecule functioning in neural development. May regulate SIAH1 activity (By similarity).
CDK5R1	CD5R1_HUMAN	10	ACTN1|AMPH|CAMK2A|CDK16|CDK5RAP1|CDK5RAP2|CDK5RAP3|CTNNB1|SET|SUDS3	0.33	p35 is a neuron specific activator of CDK5. The complex p35/CDK5 is required for neurite outgrowth and cortical lamination. Involved in dendritic spine morphogenesis by mediating the EFNA1-EPHA4 signaling. Activator of TPKII.
HSF1	HSF1_HUMAN	10	CDC20|CEBPB|FILIP1|HSBP1|HSF2|HSP90AA1|HSPA1A|MTA1|RALBP1|SYMPK	0.33	DNA-binding protein that specifically binds heat shock promoter elements (HSE) and activates transcription. In higher eukaryotes, HSF is unable to bind to the HSE unless the cells are heat shocked.
EIF2AK2	E2AK2_HUMAN	9	DNAJC3|EIF2S1|ILF3|METAP2|PPP1CA|PRKRA|STAT1|TARBP2|TP53	0.328	Following activation by double-stranded RNA in the presence of ATP, the kinase becomes autophosphorylated and can catalyze the phosphorylation of the translation initiation factor EIF2S1, which leads to an inhibition of the initiation of protein synthesis. Double-stranded RNA is generated during the course of a viral infection. In addition to serine/threonine-protein kinase activity, also has tyr…
TEAD1	TEAD1_HUMAN	5	MAX|MEF2C|SRF|VGLL1|VGLL4	0.328	Transcription factor which plays a key role in the Hippo signaling pathway, a pathway involved in organ size control and tumor suppression by restricting proliferation and promoting apoptosis. The core of this pathway is composed of a kinase cascade wherein MST1/MST2, in complex with its regulatory protein SAV1, phosphorylates and activates LATS1/2 in complex with its regulatory protein MOB1, whi…
SFPQ	SFPQ_HUMAN	6	AR|NONO|PTBP1|SIN3A|STAT6|UBC	0.328	DNA- and RNA binding protein, involved in several nuclear processes. Essential pre-mRNA splicing factor required early in spliceosome formation and for splicing catalytic step II, probably as an heteromer with NONO. Binds to pre-mRNA in spliceosome C complex, and specifically binds to intronic polypyrimidine tracts. Interacts with U5 snRNA, probably by binding to a purine-rich sequence located on…
CBX3	CBX3_HUMAN	12	CBX1|CBX5|DNMT3B|H3F3A|HIST1H3A|L3MBTL|LBR|MKI67|PAX3|PIM1|SP100|TRIM28	0.328	Seems to be involved in transcriptional silencing in heterochromatin-like complexes. Recognizes and binds histone H3 tails methylated at 'Lys-9', leading to epigenetic repression. May contribute to the association of the heterochromatin with the inner nuclear membrane through its interaction with lamin B receptor (LBR). Involved in the formation of functional kinetochore through interaction with …
SAP30	SAP30_HUMAN	9	ARID4A|HDAC1|ING1|RBBP4|RBBP7|SAMSN1|SIN3A|YY1|ZNF395	0.326	Involved in the functional recruitment of the Sin3- histone deacetylase complex (HDAC) to a specific subset of N-CoR corepressor complexes. Capable of transcription repression by N- CoR. Active in deacetylating core histone octamers (when in a complex) but inactive in deacetylating nucleosomal histones.
CEBPA	CEBPA_HUMAN	8	ATF2|CDK2|CDK4|MAPK8|MAX|SMARCA2|SMARCA4|SPI1	0.326	C/EBP is a DNA-binding protein that recognizes two different motifs: the CCAAT homology common to many promoters and the enhanced core homology common to many enhancers.
MUC1	MUC1_HUMAN	9	CTNNB1|CTNND1|EGFR|ESR1|GRB2|GSK3B|LYN|PRKCD|SRC	0.324	The alpha subunit has cell adhesive properties. Can act both as an adhesion and an anti-adhesion protein. May provide a protective layer on epithelial cells against bacterial and enzyme attack.
REL	REL_HUMAN	7	CREBBP|EP300|MAPK8|MTPN|NFKBIE|PPP4C|RELA	0.324	Proto-oncogene that may play a role in differentiation and lymphopoiesis. NF-kappa-B is a pleiotropic transcription factor which is present in almost all cell types and is involved in many biological processed such as inflammation, immunity, differentiation, cell growth, tumorigenesis and apoptosis. NF- kappa-B is a homo- or heterodimeric complex formed by the Rel-like domain-containing proteins …
GAB1	GAB1_HUMAN	5	GRB2|MAP3K3|PIK3R1|PLCG1|PTPN11	0.324	Adapter protein that plays a role in intracellular signaling cascades triggered by activated receptor-type kinases. Plays a role in FGFR1 signaling. Probably involved in signaling by the epidermal growth factor receptor (EGFR) and the insulin receptor (INSR).
TP73	P73_HUMAN	13	ABL1|CEBPZ|CHUK|FBXO45|GNB2L1|HDAC1|HECW2|ITCH|MDM2|MDM4|MYC|RANBP9|YAP1	0.322	Participates in the apoptotic response to DNA damage. Isoforms containing the transactivation domain are pro-apoptotic, isoforms lacking the domain are anti-apoptotic and block the function of p53 and transactivating p73 isoforms. May be a tumor suppressor protein.
TBP	TBP_HUMAN	33	BRD2|BRF1|BTAF1|EDF1|FOS|GTF2A1|GTF2B|GTF2F1|MSX1|NFYB|PAX6|POU2F1|POU2F2|RELA|REST|RXRA|TAF1|TAF10|TAF11|TAF12|TAF13|TAF15|TAF1C|TAF2|TAF4|TAF5|TAF6|TAF7|TAF8|TAF9|TAT|TP53|ZNF76	0.322	General transcription factor that functions at the core of the DNA-binding multiprotein factor TFIID. Binding of TFIID to the TATA box is the initial transcriptional step of the pre- initiation complex (PIC), playing a role in the activation of eukaryotic genes transcribed by RNA polymerase II. Component of the transcription factor SL1/TIF-IB complex, which is involved in the assembly of the PIC …
RXRA	RXRA_HUMAN	24	BCL3|BRD8|CLOCK|IGFBP3|ITGB3BP|MED1|NCOA1|NCOA6|NCOR2|NFKBIB|NPAS2|NR0B2|NR1H2|NR1H4|NR4A1|PPARG|PPARGC1A|RARA|RNF8|SP1|TADA3|TBP|THRB|VDR	0.32	Receptor for retinoic acid. Retinoic acid receptors bind as heterodimers to their target response elements in response to their ligands, all-trans or 9-cis retinoic acid, and regulate gene expression in various biological processes. The RAR/RXR heterodimers bind to the retinoic acid response elements (RARE) composed of tandem 5'-AGGTCA-3' sites known as DR1-DR5. The high affinity ligand for RXRs …
SPI1	SPI1_HUMAN	11	BCL6|CEBPA|DNMT3A|DNMT3B|FUS|GATA2|HDAC1|MECP2|NONO|SIN3A|SKI	0.32	Binds to the PU-box, a purine-rich DNA sequence (5'- GAGGAA-3') that can act as a lymphoid-specific enhancer. This protein is a transcriptional activator that may be specifically involved in the differentiation or activation of macrophages or B- cells. Also binds RNA and may modulate pre-mRNA splicing (By similarity).
GATA1	GATA1_HUMAN	9	FLI1|HDAC3|HDAC4|HDAC5|HSPB1|LMO2|MED1|TAL1|ZFPM2	0.32	Transcriptional activator which probably serves as a general switch factor for erythroid development. It binds to DNA sites with the consensus sequence [AT]GATA[AG] within regulatory regions of globin genes and of other genes expressed in erythroid cells.
SHC1	SHC1_HUMAN	23	AP2A2|APP|CSF3R|DAG1|DDR2|EPHA2|EPS8|ESR1|FLT4|GRB2|IGF1R|IL2RB|IL4R|IL6ST|LRP1|MAPKAPK2|NTRK1|PLSCR1|PRKCD|PTPN12|RET|SHCBP1|ZAP70	0.318	Signaling adapter that couples activated growth factor receptors to signaling pathways. Participates in a signaling cascade initiated by activated KIT and KITLG/SCF. Isoform p46Shc and isoform p52Shc, once phosphorylated, couple activated receptor tyrosine kinases to Ras via the recruitment of the GRB2/SOS complex and are implicated in the cytoplasmic propagation of mitogenic signals. Isoform p46…
POU1F1	PIT1_HUMAN	5	CREBBP|GATA2|MED1|NCOR1|PITX1	0.318	Transcription factor involved in the specification of the lactotrope, somatotrope, and thyrotrope phenotypes in the developing anterior pituitary. Activates growth hormone and prolactin genes. Specifically binds to the consensus sequence 5'- TAAAT-3'.
GRB2	GRB2_HUMAN	64	ABL1|ADAM15|ADRB2|BCAR1|BCR|BLNK|CBL|CBLB|CD28|CRK|CSF1R|CSF3R|DAG1|DCTN1|DNM1|DOCK1|EGFR|EPHA2|ETV6|FASLG|FRS2|GAB1|GAB2|HNRNPC|HTT|IL6ST|INPP5D|IRS1|JAK1|JAK2|KHDRBS1|KIT|KRT8|LAT|LCP2|LY6G6F|MAP3K1|MAP4K1|MED28|MET|MST1R|MUC1|NCKIPSD|NTRK1|PDGFRB|PIK3R1|PLCG1|PRKAR1A|PTK2|PTPN11|PTPN12|PTPRA|RAPGEF1|SH2B1|SHC1|SOS1|SOS2|SPRY2|STAMBP|TNK2|VAV1|VAV3|WAS|WASL	0.318	Adapter protein that provides a critical link between cell surface growth factor receptors and the Ras signaling pathway.
NPM1	NPM_HUMAN	9	AKT1|CDKN2A|CDT1|HCVGP1|NCL|PADI4|TFAP2A|USP36|YY1	0.318	Involved in diverse cellular processes such as ribosome biogenesis, centrosome duplication, protein chaperoning, histone assembly, cell proliferation, and regulation of tumor suppressors p53/TP53 and ARF. Binds ribosome presumably to drive ribosome nuclear export. Associated with nucleolar ribonucleoprotein structures and bind single-stranded nucleic acids. Acts as a chaperonin for the core histo…
TDG	TDG_HUMAN	8	CREBBP|DNMT3A|DNMT3B|ESR1|PML|SUMO1|SUMO2|SUMO3	0.314	In the DNA of higher eukaryotes, hydrolytic deamination of 5-methylcytosine to thymine leads to the formation of G/T mismatches. This enzyme corrects G/T mispairs to G/C pairs. It is capable of hydrolyzing the carbon-nitrogen bond between the sugar- phosphate backbone of the DNA and a mispaired thymine. In addition to the G/T, it can remove thymine also from C/T and T/T mispairs in the order G/T …
SHB	SHB_HUMAN	7	EPS8|FGFR1|LCP2|PIK3R1|SRC|VAV1|ZAP70	0.314	Adapter protein which regulates several signal transduction cascades by linking activated receptors to downstream signaling components. May play a role in angiogenesis by regulating FGFR1, VEGFR2 and PDGFR signaling. May also play a role in T-cell antigen receptor/TCR signaling, interleukin-2 signaling, apoptosis and neuronal cells differentiation by mediating basic- FGF and NGF-induced signaling…
HNF4A	HNF4A_HUMAN	11	CREBBP|CTNNB1|FOXO1|MED1|MED14|NR0B2|NR2C2|PPARGC1A|PRMT1|SP1|ZNHIT3	0.314	Transcriptionally controlled transcription factor. Binds to DNA sites required for the transcription of alpha 1- antitrypsin, apolipoprotein CIII, transthyretin genes and HNF1- alpha. May be essential for development of the liver, kidney and intestine.
ITGB3BP	CENPR_HUMAN	6	CCNA2|ITGB3|MTA1|NFKB1|RXRA|THRA	0.314	Transcription coregulator that can have both coactivator and corepressor functions. Isoform 1, but not other isoforms, is involved in the coactivation of nuclear receptors for retinoid X (RXRs) and thyroid hormone (TRs) in a ligand-dependent fashion. In contrast, it does not coactivate nuclear receptors for retinoic acid, vitamin D, progesterone receptor, nor glucocorticoid. Acts as a coactivator…
SIAH2	SIAH2_HUMAN	11	AKAP1|DLST|HIPK2|PEG10|PEG3|PIAS1|PLCE1|SPRY2|SYP|USP13|VAV1	0.312	E3 ubiquitin-protein ligase that mediates ubiquitination and subsequent proteasomal degradation of target proteins. E3 ubiquitin ligases accept ubiquitin from an E2 ubiquitin- conjugating enzyme in the form of a thioester and then directly transfers the ubiquitin to targeted substrates. Mediates E3 ubiquitin ligase activity either through direct binding to substrates or by functioning as the esse…
TAL1	TAL1_HUMAN	9	CBFA2T3|EP300|GATA1|LMO1|LMO2|SIN3A|SP1|TCF3|TCF4	0.312	Implicated in the genesis of hemopoietic malignancies. It may play an important role in hemopoietic differentiation. Serves as a positive regulator of erythroid differentiation (By similarity).
ETV6	ETV6_HUMAN	7	FBXL6|FLI1|GRB2|KAT5|L3MBTL|NCOR1|UBE2I	0.312	Transcriptional repressor; binds to the DNA sequence 5'- CCGGAAGT-3'.
TAF15	RBP56_HUMAN	9	POLR2C|POLR2E|POLR2G|SAFB|TAF11|TAF13|TAF5|TAF7|TBP	0.31	RNA and ssDNA-binding protein that may play specific roles during transcription initiation at distinct promoters. Can enter the preinitiation complex together with the RNA polymerase II (Pol II).
PTTG1	PTTG1_HUMAN	6	CDC27|DNAJA1|PTTG1IP|RPS10|TP53|XRCC6	0.31	Regulatory protein, which plays a central role in chromosome stability, in the p53/TP53 pathway, and DNA repair. Probably acts by blocking the action of key proteins. During the mitosis, it blocks Separase/ESPL1 function, preventing the proteolysis of the cohesin complex and the subsequent segregation of the chromosomes. At the onset of anaphase, it is ubiquitinated, conducting to its destruction…
MYB	MYB_HUMAN	14	CHD3|CREBBP|FBXW7|HIPK2|MAF|NCOR1|NLK|PML|RPL4|SIN3A|SKI|SND1|TRIM28|ZMYND11	0.31	Transcriptional activator; DNA-binding protein that specifically recognize the sequence 5'-YAAC[GT]G-3'. Plays an important role in the control of proliferation and differentiation of hematopoietic progenitor cells.
TP53	P53_HUMAN	146	AIMP2|ANKRD2|APTX|ATF3|ATM|ATR|AURKA|BACH1|BAIAP2L1|BAK1|BANP|BLM|BRCA1|BTRC|CCNG1|CCNH|CDC14A|CDC14B|CDK1|CDK5|CDK7|CEBPZ|CHEK1|CHEK2|COPS5|CREB1|CREBBP|CUL7|CUL9|E4F1|EFEMP2|EGR1|EIF2AK2|ELL|EP300|ERCC3|ERCC6|FBXO11|G3BP1|G3BP2|GNL3|GPS2|HABP4|HDAC1|HDAC2|HIF1A|HIPK1|HIPK2|HMGB1|HSPA9|HTT|ING4|KAT2B|KDM1A|KPNA4|KPNB1|L3MBTL|MAGEA2|MAPK1|MAPK8|MAPK9|MDH1|MDM2|MDM4|MED1|MNAT1|MSL2|MTA1|MTA2|MYST1…	0.308	Acts as a tumor suppressor in many tumor types; induces growth arrest or apoptosis depending on the physiological circumstances and cell type. Involved in cell cycle regulation as a trans-activator that acts to negatively regulate cell division by controlling a set of genes required for this process. One of the activated genes is an inhibitor of cyclin-dependent kinases. Apoptosis induction seems…
ARNTL	BMAL1_HUMAN	6	AHR|EPAS1|HIF1A|NPAS2|SIRT1|SUMO3	0.308	ARNTL-CLOCK heterodimers activate E-box element (3'- CACGTG-5') transcription of a number of proteins of the circadian clock. This transcription is inhibited in a feedback loop by PER, and also by CRY proteins (By similarity).
CD3E	CD3E_HUMAN	5	CD3EAP|LCK|NCK2|TOP2B|ZAP70	0.306	The CD3 complex mediates signal transduction.
MEF2A	MEF2A_HUMAN	9	ACTN4|ASCL1|EP300|HDAC4|HDAC5|HDAC7|HDAC9|SMAD2|THRA	0.304	Transcriptional activator which binds specifically to the MEF2 element, 5'-YTA[AT](4)TAR-3', found in numerous muscle- specific genes. Also involved in the activation of numerous growth factor- and stress-induced genes. Mediates cellular functions not only in skeletal and cardiac muscle development, but also in neuronal differentiation and survival. Plays diverse roles in the control of cell grow…
UBQLN1	UBQL1_HUMAN	6	MTOR|P4HB|PSEN1|PSEN2|UBC|UBE3A	0.304	Links CD47 to the cytoskeleton. Promotes the surface expression of GABA-A receptors (By similarity). Promotes the accumulation of uncleaved PSEN1 and PSEN2 by stimulating their biosynthesis. Has no effect on PSEN1 and PSEN2 degradation.
TANK	TANK_HUMAN	8	IKBKE|IKBKG|IRF7|MARCH5|PLK1|TBK1|TRAF2|TRAF3	0.304	Acts as a regulator of TRAF function by maintaining them in a latent state. Overexpression inhibits TRAF2-mediated NF- kappa-B activation signaled by CD40, TNFR1 and TNFR2. Blocks TRAF2 binding to LMP1 and inhibits LMP1-mediated NF-kappa-B activation. May be involved in I-kappa-B-kinase (IKK) regulation; may function as an adapter for kinases such as TBK1 or IKBKE that can modulate IKK activity.
GATAD2B	P66B_HUMAN	6	FOXP2|HDAC1|MBD2|MBD3|RBBP4|RBBP7	0.304	Has transcriptional repressor activity. Targets MBD3 to discrete loci in the nucleus.
RYBP	RYBP_HUMAN	9	ABL1|CBX2|E2F2|E2F3|E2F6|MDM2|RING1|UBC|YY1	0.304	Inhibits ubiquitination and subsequent degradation of TP53, and thereby plays a role in regulating transcription of TP53 target genes. May be implicated in the regulation of the transcription as a repressor of the transcriptional activity of E4TF1. May bind to DNA. Promotes apoptosis.
EWSR1	EWS_HUMAN	7	BARD1|DHX9|POU4F1|PTK2B|SF1|SNRPC|ZNF165	0.3	Might normally function as a repressor. EWS-fusion- proteins (EFPS) may play a role in the tumorigenic process. They may disturb gene expression by mimicking, or interfering with the normal function of CTD-POLII within the transcription initiation complex. They may also contribute to an aberrant activation of the fusion protein target genes.
STAM	STAM1_HUMAN	7	ARRB1|HGS|JAK2|STAMBP|TIMM8A|UBC|USP8	0.298	Involved in intracellular signal transduction mediated by cytokines and growth factors. Upon IL-2 and GM-CSL stimulation, it plays a role in signaling leading to DNA synthesis and MYC induction. May also play a role in T-cell development. Involved in down-regulation of receptor tyrosine kinase via multivesicular body (MVBs) when complexed with HGS (ESCRT-0 complex). The ESCRT-0 complex binds ubiq…
CITED2	CITE2_HUMAN	5	EP300|LHX2|SMAD3|TFAP2A|TFAP2C	0.296	Transcriptional coactivator of the p300/CBP-mediated trancription complex. Acts as a bridge, linking TFAP2 transcription factors and the p300/CBP transcriptional coactivator complex in order to stimulate TFAP2-mediated transcriptional activation. Positively regulates TGF-beta signaling through its association with the SMAD/p300/CBP-mediated transcriptional coactivator complex. Stimulates the pero…
BCL2L11	B2L11_HUMAN	7	BCL2|BCL2A1|BCL2L1|BCL2L2|DYNLL1|MCL1|VDAC1	0.294	Induces apoptosis. Isoform BimL is more potent than isoform BimEL. Isoform Bim-alpha1, isoform Bim-alpha2 and isoform Bim-alpha3 induce apoptosis, although less potent than isoform BimEL, isoform BimL and isoform BimS. Isoform Bim-gamma induces apoptosis. Isoform Bim-alpha3 induces apoptosis possibly through a caspase-mediated pathway. Isoform BimAC and isoform BimABC lack the ability to induce a…
BRCA1	BRCA1_HUMAN	73	ACACA|AKT1|AR|ARNT|ATF1|ATM|ATR|AURKA|BACH1|BARD1|BRAP|BRCA2|BRD7|BRIP1|CCND1|CDK2|CDK4|CDKN2D|CHEK2|COBRA1|CREBBP|CSNK2B|DHX9|ELK4|EP300|ESR1|FANCA|FANCD2|FHL2|H2AFX|JUN|JUNB|JUND|KAT2A|LMO4|MAP3K3|MED1|MRE11A|MSH2|MSH3|MSH6|MYC|NCOA2|NCOA3|NMI|NUFIP1|POLR2A|PPP1CA|PPP1CB|PRMT1|RAD50|RAD51|RB1|RBBP4|RBBP7|RBBP8|RELA|RPL31|SMAD3|SMARCA4|SRC|STAT1|SUMO1|TOP2A|TP53|TRRAP|TUBG1|UBC|UBE2D3|UBE2I|VCP|…	0.294	E3 ubiquitin-protein ligase that specifically mediates the formation of 'Lys-6'-linked polyubiquitin chains and plays a central role in DNA repair by facilitating cellular responses to DNA damage. It is unclear whether it also mediates the formation of other types of polyubiquitin chains. The E3 ubiquitin-protein ligase activity is required for its tumor suppressor function. The BRCA1-BARD1 heter…
MED28	MED28_HUMAN	8	GRB2|MED1|MED12|MED13|MED17|MED20|MED21|NF2	0.294	Component of the Mediator complex, a coactivator involved in the regulated transcription of nearly all RNA polymerase II-dependent genes. Mediator functions as a bridge to convey information from gene-specific regulatory proteins to the basal RNA polymerase II transcription machinery. Mediator is recruited to promoters by direct interactions with regulatory proteins and serves as a scaffold for t…
TGIF1	TGIF1_HUMAN	5	CTBP1|JUN|SIN3A|SMAD2|SMAD3	0.294	Binds to a retinoid X receptor (RXR) responsive element from the cellular retinol-binding protein II promoter (CRBPII- RXRE). Inhibits the 9-cis-retinoic acid-dependent RXR alpha transcription activation of the retinoic acid responsive element. Active transcriptional corepressor of SMAD2. Links the nodal signaling pathway to the bifurcation of the forebrain and the establishment of ventral midlin…
CDC25B	MPIP2_HUMAN	11	BTRC|CHEK1|CSNK2A1|ESR1|FBXW11|MAPK14|MELK|YWHAB|YWHAE|YWHAH|YWHAZ	0.292	Tyrosine protein phosphatase which functions as a dosage-dependent inducer of mitotic progression. Required for G2/M phases of the cell cycle progression and abscission during cytokinesis in a ECT2-dependent manner. Directly dephosphorylates CDK1 and stimulates its kinase activity. The three isoforms seem to have a different level of activity.
ATF4	ATF4_HUMAN	7	BTRC|DAPK3|EP300|GABBR1|JUN|POLR2C|TRIB3	0.292	Transcriptional activator. Binds the cAMP response element (CRE) (consensus: 5'-GTGACGT[AC][AG]-3'), a sequence present in many viral and cellular promoters. Cooperates with FOXO1 in osteoblasts to regulate glucose homeostasis through suppression of beta-cell production and decrease in insulin production (By similarity). It binds to a Tax-responsive enhancer element in the long terminal repeat of…
FUS	FUS_HUMAN	6	ILF3|PRMT1|RELA|SPI1|SRSF10|TARDBP	0.288	Binds both single-stranded and double-stranded DNA and promotes ATP-independent annealing of complementary single- stranded DNAs and D-loop formation in superhelical double-stranded DNA. May play a role in maintenance of genomic integrity.
AES	AES_HUMAN	5	AR|PTRH2|RELA|SIX3|SIX6	0.286	Acts as dominant repressor towards other family members. Inhibits NF-kappa-B-regulated gene expression. May be required for the initiation and maintenance of the differentiated state.
CDKN1B	CDN1B_HUMAN	13	AKT1|CCND1|CCND3|CDK4|CKS1B|COPS5|NUP50|RCHY1|RNF123|SKP2|SPDYA|UBE3A|XPO1	0.286	Important regulator of cell cycle progression. Involved in G1 arrest. Potent inhibitor of cyclin E- and cyclin A-CDK2 complexes. Forms a complex with cyclin type D-CDK4 complexes and is involved in the assembly, stability, and modulation of CCND1- CDK4 complex activation. Acts either as an inhibitor or an activator of cyclin type D-CDK4 complexes depending on its phosphorylation state and/or stoi…
RAD18	RAD18_HUMAN	6	CDC7|HLTF|RAD51|TP53BP1|UBE2A|UBE2B	0.286	E3 ubiquitin-protein ligase involved in postreplication repair of UV-damaged DNA. Postreplication repair functions in gap- filling of a daughter strand on replication of damaged DNA. Associates to the E2 ubiquitin conjugating enzyme UBE2B to form the UBE2B-RAD18 ubiquitin ligase complex involved in mono- ubiquitination of DNA-associated PCNA on 'Lys-164'. Has ssDNA binding activity.
TADA3	TADA3_HUMAN	6	ANKRD12|ESR1|RARA|RXRA|TADA2A|USP5	0.286	Functions as a component of the PCAF complex. The PCAF complex is capable of efficiently acetylating histones in a nucleosomal context. The PCAF complex could be considered as the human version of the yeast SAGA complex. Also known as a coactivator for p53/TP53-dependent transcriptional activation. Component of the ATAC complex, a complex with histone acetyltransferase activity on histones H3 and…
LEF1	LEF1_HUMAN	8	CTNNB1|EP300|KPNA1|KPNA2|MITF|PIAS4|SMAD2|SMAD3	0.286	Participates in the Wnt signaling pathway. Activates transcription of target genes in the presence of CTNNB1 and EP300. May play a role in hair cell differentiation and follicle morphogenesis. TLE1, TLE2, TLE3 and TLE4 repress transactivation mediated by LEF1 and CTNNB1. Regulates T-cell receptor alpha enhancer function. Binds DNA in a sequence-specific manner. PIAG antagonizes both Wnt-dependent…
TAB2	TAB2_HUMAN	7	HDAC3|MAP3K7|NCOR1|NFKB1|NUMBL|TRAF6|UBC	0.284	Adapter linking MAP3K7/TAK1 and TRAF6. Promotes MAP3K7 activation in the IL1 signaling pathway. The binding of 'Lys-63'- linked polyubiquitin chains to TAB2 promotes autophosphorylation of MAP3K7 at 'Thr-187'. Involved in heart development.
AATF	AATF_HUMAN	5	MAGED1|POLR2J|RB1|SP1|TSG101	0.284	May function as a general inhibitor of the histone deacetylase HDAC1. Binding to the pocket region of RB1 may displace HDAC1 from RB1/E2F complexes, leading to activation of E2F target genes and cell cycle progression. Conversely, displacement of HDAC1 from SP1 bound to the CDKN1A promoter leads to increased expression of this CDK inhibitor and blocks cell cycle progression. Also antagonizes PAWR…
MEF2C	MEF2C_HUMAN	8	HDAC4|HDAC7|IFRD1|MAPK7|MYOD1|SOX18|SP1|TEAD1	0.284	Transcription activator which binds specifically to the MEF2 element present in the regulatory regions of many muscle- specific genes. Controls cardiac morphogenesis and myogenesis, and is also involved in vascular development. Plays an essential role in hippocampal-dependent learning and memory by suppressing the number of excitatory synapses and thus regulating basal and evoked synaptic transmi…
MYOD1	MYOD1_HUMAN	22	CDK4|CDKN1C|CREBBP|CSRP3|ELSPBP1|EP300|HDAC1|HIST1H3A|ID1|ID2|IFRD1|JUN|KAT2B|MDFI|MEF2C|MOS|PRMT5|RB1|RUNX1|STAT3|SUV39H1|TCF3	0.282	Involved in muscle differentiation (myogenic factor). Induces fibroblasts to differentiate into myoblasts. Activates muscle-specific promoters. Interacts with and is inhibited by the twist protein. This interaction probably involves the basic domains of both proteins (By similarity).
SNW1	SNW1_HUMAN	11	CIR1|MEN1|NCOR1|NCOR2|NOTCH1|PABPN1|RBPJ|SKI|SMAD2|SMAD3|VDR	0.282	Involved in vitamin D-mediated transcription. Can function as a splicing factor in pre-mRNA splicing.
CDC25A	MPIP1_HUMAN	9	BTRC|CCNE1|CHEK1|EGFR|FBXW11|MAP3K5|PIM1|RAF1|YWHAB	0.282	Tyrosine protein phosphatase which functions as a dosage-dependent inducer of mitotic progression. Directly dephosphorylates CDK1 and stimulates its kinase activity. Also dephosphorylates CDK2 in complex with cyclin E, in vitro.
TOPBP1	TOPB1_HUMAN	6	ABL1|BRIP1|E2F1|RAD9A|UBR5|ZBTB17	0.28	Required for DNA replication. Plays a role in the rescue of stalled replication forks and checkpoint control. Binds double- stranded DNA breaks and nicks as well as single-stranded DNA. Recruits the SWI/SNF chromatin remodeling complex to E2F1- responsive promoters. Down-regulates E2F1 activity and inhibits E2F1-dependent apoptosis during G1/S transition and after DNA damage. Induces a large incr…
NFE2L2	NF2L2_HUMAN	7	CREBBP|EIF2AK3|JUN|KEAP1|NCOR2|PRKCD|UBC	0.28	Transcription activator that binds to antioxidant response (ARE) elements in the promoter regions of target genes. Important for the coordinated up-regulation of genes in response to oxidative stress. May be involved in the transcriptional activation of genes of the beta-globin cluster by mediating enhancer activity of hypersensitive site 2 of the beta-globin locus control region.
EMD	EMD_HUMAN	5	ACTG2|GMCL1|LMNA|PSME1|YTHDC1	0.278	Stabilizes and promotes the formation of a nuclear actin cortical network. Stimulates actin polymerization in vitro by binding and stabilizing the pointed end of growing filaments. Inhibits beta-catenin activity by preventing its accumulation in the nucleus. Acts by influencing the nuclear accumulation of beta- catenin through a CRM1-dependent export pathway. Links centrosomes to the nuclear enve…
TOB1	TOB1_HUMAN	5	CNOT7|MAPK1|MAPK9|MARCKS|RPS6KA1	0.274	Anti-proliferative protein that interacts with the erbB- 2 receptor tyrosine kinase. May physically and/or functionally interact with protein-tyrosine kinase receptors.
SKP1	SKP1_HUMAN	20	BTRC|CACYBP|CDCA3|CDK9|CTNNB1|CUL1|FBXL3|FBXO18|FBXO4|FBXO44|FBXO5|FBXO7|FBXW11|FBXW2|FBXW7|NFKBIA|RBX1|SKP2|TERF1|ZC3HC1	0.27	Essential component of the SCF (SKP1-CUL1-F-box protein) ubiquitin ligase complex, which mediates the ubiquitination of proteins involved in cell cycle progression, signal transduction and transcription. In the SCF complex, serves as an adapter that links the F-box protein to CUL1. SCF(BTRC) mediates the ubiquitination of NFKBIA at 'Lys-21' and 'Lys-22'; the degradation frees the associated NFKB1…
TAF9	TAF9_HUMAN	6	GTF2B|MYC|NCOR1|TAF6|TBP|TP53	0.264	Essential for cell viability. TAF9 and TAF9B are involved in transcriptional activation as well as repression of distinct but overlapping sets of genes. May have a role in gene regulation associated with apoptosis. TAFs are components of the transcription factor IID (TFIID) complex, the TBP-free TAFII complex (TFTC), the PCAF histone acetylase complex and the STAGA transcription coactivator-HAT c…
LCP2	LCP2_HUMAN	10	GRAP2|GRB2|ITK|LYN|NCK1|PIK3R1|PLCG1|PTPN6|SHB|VAV1	0.26	Involved in T-cell antigen receptor mediated signaling.
NBN	NBN_HUMAN	5	ATM|H2AFX|MRE11A|RECQL5|SIRT1	0.254	Component of the MRE11-RAD50-NBN (MRN complex) which plays a critical role in the cellular response to DNA damage and the maintenance of chromosome integrity. The complex is involved in double-strand break (DSB) repair, DNA recombination, maintenance of telomere integrity, cell cycle checkpoint control and meiosis. The complex possesses single-strand endonuclease activity and double-strand-specif…
SMN1	SMN_HUMAN	18	BCL2|COIL|DDX20|DHX9|FBL|FUBP1|GAR1|GEMIN5|GEMIN7|HNRNPR|KPNB1|LSM10|LSM11|SIP1|SNRPB|SNRPD1|SNRPD2|TP53	0.244	The SMN complex plays an essential role in spliceosomal snRNP assembly in the cytoplasm and is required for pre-mRNA splicing in the nucleus. It may also play a role in the metabolism of snoRNPs.
PYGO2	PYGO2_HUMAN	5	ASH2L|KAT2A|MLL2|RBBP5|WDR5	0.238	Involved in signal transduction through the Wnt pathway.
BMI1	BMI1_HUMAN	6	CBX4|RING1|RNF2|USP11|USP7|ZBTB16	0.234	Component of a Polycomb group (PcG) multiprotein PRC1- like complex, a complex class required to maintain the transcriptionally repressive state of many genes, including Hox genes, throughout development. PcG PRC1 complex acts via chromatin remodeling and modification of histones; it mediates monoubiquitination of histone H2A 'Lys-119', rendering chromatin heritably changed in its expressibility.…
JUN	JUN_HUMAN	48	ASCC1|ASCC2|ASCC3|ATF2|ATF3|ATF4|BCL3|BCL6|BRCA1|COBRA1|COPS5|CREBBP|CSK|CSNK2A1|CSNK2A2|DACH1|DDIT3|DDX21|EDF1|EP300|ESR1|ETS2|FOS|FOSL1|HMGA1|MAPK8|MAZ|MBD3|MYOD1|MYST2|NACA|NCOA1|NCOR2|NFE2L1|NFE2L2|PIN1|PPP3CB|RB1|RBM39|RNF187|RUNX1|RUNX2|SMAD3|SP1|STAT3|SUMO1|TGIF1|UBC	0.232	Transcription factor that recognizes and binds to the enhancer heptamer motif 5'-TGA[CG]TCA-3'. Promotes activity of NR5A1 when phosphorylated by HIPK3 leading to increased steroidogenic gene expression upon cAMP signaling pathway stimulation.
HES1	HES1_HUMAN	7	FANCA|FANCF|FANCG|FANCL|SIRT1|TLE1|TLE2	0.206	Transcriptional repressor of genes that require a bHLH protein for their transcription. May act as a negative regulator of myogenesis by inhibiting the functions of MYOD1 and ASH1. Binds DNA on N-box motifs: 5'-CACNAG-3' with high affinity and on E-box motifs: 5'-CANNTG-3' with low affinity (By similarity). May play a role in a functional FA core complex response to DNA cross-link damage, being r…
